# Supplementary material for: Golgi-apparatus genes related signature for predicting the progression-free interval of patients with papillary thyroid carcinoma
Source: BMC Med Genomics. 2023 Mar 27;16:60. doi: 10.1186/s12920-023-01485-z (PMC10041766; doi:10.1186/s12920-023-01485-z)
Supplement: Supplementary file 3 — Supplementary Material 3 [file 12920_2023_1485_MOESM3_ESM.xlsx]

## Sheet: Sheet 1
Supplementary table 3. Functional enrichment results of 260 DE-GaGs
ONTOLOGY	ID	Description	GeneRatio	BgRatio	pvalue	p.adjust	qvalue	geneID	Count
BP	GO:0009101	glycoprotein biosynthetic process	50/246	348/18670	2.13984e-37	7.81468e-34	5.61763e-34	ACAN/BGN/VCAN/CSPG4/DCN/EXTL1/FUT1/FUT2/FUT3/MGAT3/MUC1/MUC4/MUC5AC/ST8SIA4/ST8SIA2/B3GALT2/ST3GAL5/B4GALT6/HS3ST4/B3GALT5/B3GNT3/CSPG5/FUT9/GALNT5/MGAT4B/B3GAT1/CHST11/GALNT9/ST8SIA3/GCNT4/GALNT7/CSGALNACT1/BCAN/HS3ST6/ST6GALNAC5/CHST9/HS6ST2/DSEL/B3GNT7/GALNT13/B4GALNT2/CHST13/B3GNT6/MUC20/MUC19/ACER2/B3GNT8/MUC21/GALNTL6/MUC5B	50
BP	GO:0006023	aminoglycan biosynthetic process	34/246	115/18670	7.73442e-37	1.41231e-33	1.01524e-33	ACAN/BGN/VCAN/CSPG4/DCN/EXTL1/FMOD/GPC3/CHST6/OMD/OGN/PDGFB/SDC1/SDC4/TGFB1/B4GALT6/CHST2/SDC3/B3GNT3/CSPG5/GALNT5/CHST11/CSGALNACT1/BCAN/HS3ST6/CHST9/HS6ST2/DSEL/B3GNT7/CHST13/B3GNT6/GPC2/B3GNT8/AGRN	34
BP	GO:0009100	glycoprotein metabolic process	51/246	419/18670	1.64094e-34	1.72404e-31	1.23934e-31	ACAN/BGN/VCAN/CSPG4/DCN/EXTL1/FUT1/FUT2/FUT3/MGAT3/MUC1/MUC4/MUC5AC/PCSK6/ST8SIA4/ST8SIA2/B3GALT2/ST3GAL5/B4GALT6/HS3ST4/B3GALT5/B3GNT3/CSPG5/FUT9/GALNT5/MGAT4B/B3GAT1/CHST11/GALNT9/ST8SIA3/GCNT4/GALNT7/CSGALNACT1/BCAN/HS3ST6/ST6GALNAC5/CHST9/HS6ST2/DSEL/B3GNT7/GALNT13/B4GALNT2/CHST13/B3GNT6/MUC20/MUC19/ACER2/B3GNT8/MUC21/GALNTL6/MUC5B	51
BP	GO:0006024	glycosaminoglycan biosynthetic process	32/246	110/18670	1.88832e-34	1.72404e-31	1.23934e-31	ACAN/BGN/VCAN/CSPG4/DCN/EXTL1/FMOD/GPC3/CHST6/OMD/OGN/PDGFB/SDC1/SDC4/TGFB1/B4GALT6/CHST2/SDC3/B3GNT3/CSPG5/GALNT5/CHST11/CSGALNACT1/BCAN/HS3ST6/CHST9/HS6ST2/DSEL/B3GNT7/CHST13/GPC2/AGRN	32
BP	GO:0006022	aminoglycan metabolic process	36/246	170/18670	3.19448e-33	2.33325e-30	1.67727e-30	ACAN/BGN/CD44/VCAN/CSPG4/DCN/EXTL1/FMOD/GPC3/CHST6/OMD/OGN/PDGFB/SDC1/SDC4/TGFB1/B4GALT6/CHST2/SDC3/B3GNT3/CSPG5/GALNT5/B3GAT1/CHST11/CSGALNACT1/BCAN/HS3ST6/CHST9/HS6ST2/DSEL/B3GNT7/CHST13/B3GNT6/GPC2/B3GNT8/AGRN	36
BP	GO:0030203	glycosaminoglycan metabolic process	34/246	160/18670	1.84364e-31	1.12216e-28	8.06672e-29	ACAN/BGN/CD44/VCAN/CSPG4/DCN/EXTL1/FMOD/GPC3/CHST6/OMD/OGN/PDGFB/SDC1/SDC4/TGFB1/B4GALT6/CHST2/SDC3/B3GNT3/CSPG5/GALNT5/B3GAT1/CHST11/CSGALNACT1/BCAN/HS3ST6/CHST9/HS6ST2/DSEL/B3GNT7/CHST13/GPC2/AGRN	34
BP	GO:0006486	protein glycosylation	35/246	258/18670	2.33881e-25	1.06767e-22	7.675e-23	EXTL1/FUT1/FUT2/FUT3/MGAT3/MUC1/MUC4/MUC5AC/ST8SIA4/ST8SIA2/B3GALT2/ST3GAL5/B4GALT6/B3GALT5/B3GNT3/FUT9/GALNT5/MGAT4B/B3GAT1/GALNT9/ST8SIA3/GCNT4/GALNT7/ST6GALNAC5/B3GNT7/GALNT13/B4GALNT2/B3GNT6/MUC20/MUC19/ACER2/B3GNT8/MUC21/GALNTL6/MUC5B	35
BP	GO:0043413	macromolecule glycosylation	35/246	258/18670	2.33881e-25	1.06767e-22	7.675e-23	EXTL1/FUT1/FUT2/FUT3/MGAT3/MUC1/MUC4/MUC5AC/ST8SIA4/ST8SIA2/B3GALT2/ST3GAL5/B4GALT6/B3GALT5/B3GNT3/FUT9/GALNT5/MGAT4B/B3GAT1/GALNT9/ST8SIA3/GCNT4/GALNT7/ST6GALNAC5/B3GNT7/GALNT13/B4GALNT2/B3GNT6/MUC20/MUC19/ACER2/B3GNT8/MUC21/GALNTL6/MUC5B	35
BP	GO:0070085	glycosylation	35/246	269/18670	9.88907e-25	4.01277e-22	2.8846e-22	EXTL1/FUT1/FUT2/FUT3/MGAT3/MUC1/MUC4/MUC5AC/ST8SIA4/ST8SIA2/B3GALT2/ST3GAL5/B4GALT6/B3GALT5/B3GNT3/FUT9/GALNT5/MGAT4B/B3GAT1/GALNT9/ST8SIA3/GCNT4/GALNT7/ST6GALNAC5/B3GNT7/GALNT13/B4GALNT2/B3GNT6/MUC20/MUC19/ACER2/B3GNT8/MUC21/GALNTL6/MUC5B	35
BP	GO:1903510	mucopolysaccharide metabolic process	23/246	112/18670	3.30576e-21	1.20726e-18	8.67848e-19	ACAN/BGN/CD44/VCAN/CSPG4/DCN/FMOD/CHST6/OMD/OGN/PDGFB/TGFB1/B4GALT6/CHST2/B3GNT3/CSPG5/CHST11/CSGALNACT1/BCAN/CHST9/DSEL/B3GNT7/CHST13	23
BP	GO:0006027	glycosaminoglycan catabolic process	18/246	61/18670	6.07368e-20	2.01646e-17	1.44955e-17	ACAN/BGN/CD44/VCAN/CSPG4/DCN/FMOD/GPC3/OMD/OGN/SDC1/SDC4/TGFB1/SDC3/CSPG5/BCAN/GPC2/AGRN	18
BP	GO:0006026	aminoglycan catabolic process	18/246	65/18670	2.20042e-19	6.69662e-17	4.81391e-17	ACAN/BGN/CD44/VCAN/CSPG4/DCN/FMOD/GPC3/OMD/OGN/SDC1/SDC4/TGFB1/SDC3/CSPG5/BCAN/GPC2/AGRN	18
BP	GO:0030166	proteoglycan biosynthetic process	17/246	69/18670	2.02336e-17	5.68409e-15	4.08604e-15	ACAN/BGN/VCAN/CSPG4/DCN/EXTL1/HS3ST4/CSPG5/B3GAT1/CHST11/CSGALNACT1/BCAN/HS3ST6/CHST9/HS6ST2/DSEL/CHST13	17
BP	GO:0016266	O-glycan processing	16/246	61/18670	6.05216e-17	1.57875e-14	1.13489e-14	MUC1/MUC4/MUC5AC/B3GNT3/GALNT5/GALNT9/GCNT4/GALNT7/B3GNT7/GALNT13/B3GNT6/MUC20/MUC19/B3GNT8/MUC21/MUC5B	16
BP	GO:0006029	proteoglycan metabolic process	17/246	94/18670	5.33513e-15	1.29893e-12	9.33741e-13	ACAN/BGN/VCAN/CSPG4/DCN/EXTL1/HS3ST4/CSPG5/B3GAT1/CHST11/CSGALNACT1/BCAN/HS3ST6/CHST9/HS6ST2/DSEL/CHST13	17
BP	GO:0006493	protein O-linked glycosylation	17/246	109/18670	6.9405e-14	1.58417e-11	1.13879e-11	MUC1/MUC4/MUC5AC/B3GNT3/GALNT5/GALNT9/GCNT4/GALNT7/B3GNT7/GALNT13/B3GNT6/MUC20/MUC19/B3GNT8/MUC21/GALNTL6/MUC5B	17
BP	GO:0050650	chondroitin sulfate proteoglycan biosynthetic process	11/246	31/18670	1.11527e-13	2.39586e-11	1.72228e-11	BGN/VCAN/CSPG4/DCN/CSPG5/B3GAT1/CHST11/CSGALNACT1/BCAN/CHST9/CHST13	11
BP	GO:0050654	chondroitin sulfate proteoglycan metabolic process	12/246	44/18670	3.04064e-13	6.16913e-11	4.43472e-11	BGN/VCAN/CSPG4/DCN/CSPG5/B3GAT1/CHST11/CSGALNACT1/BCAN/CHST9/DSEL/CHST13	12
BP	GO:0030206	chondroitin sulfate biosynthetic process	10/246	26/18670	5.79932e-13	1.11469e-10	8.01303e-11	BGN/VCAN/CSPG4/DCN/CSPG5/CHST11/CSGALNACT1/BCAN/CHST9/CHST13	10
BP	GO:0044272	sulfur compound biosynthetic process	20/246	192/18670	1.05089e-12	1.91892e-10	1.37943e-10	ACAN/BGN/VCAN/CSPG4/DCN/FMOD/CHST6/OMD/OGN/B4GALT6/CHST2/B3GNT3/CSPG5/CHST11/CSGALNACT1/BCAN/CHST9/DSEL/B3GNT7/CHST13	20
BP	GO:0030204	chondroitin sulfate metabolic process	11/246	39/18670	2.01194e-12	3.49886e-10	2.51518e-10	BGN/VCAN/CSPG4/DCN/CSPG5/CHST11/CSGALNACT1/BCAN/CHST9/DSEL/CHST13	11
BP	GO:0043062	extracellular structure organization	28/246	422/18670	2.18251e-12	3.62297e-10	2.60439e-10	ACAN/APOE/BGN/BMP1/CD44/COL1A1/VCAN/DCN/ELF3/FMOD/MMP11/MMP14/MMP16/MTTP/PDGFA/PDGFB/PDGFRA/QSOX1/SDC1/SDC4/SPP1/TGFB1/TGFBI/POSTN/CSGALNACT1/BCAN/WNT3A/AGRN	28
BP	GO:0050651	dermatan sulfate proteoglycan biosynthetic process	8/246	15/18670	4.81875e-12	7.65134e-10	5.50022e-10	BGN/VCAN/CSPG4/DCN/CSPG5/CSGALNACT1/BCAN/DSEL	8
BP	GO:0050655	dermatan sulfate proteoglycan metabolic process	8/246	16/18670	9.52833e-12	1.43666e-09	1.03275e-09	BGN/VCAN/CSPG4/DCN/CSPG5/CSGALNACT1/BCAN/DSEL	8
BP	GO:1901136	carbohydrate derivative catabolic process	19/246	192/18670	9.83474e-12	1.43666e-09	1.03275e-09	ACAN/BGN/CD44/VCAN/CSPG4/DCN/FMOD/GPC3/OMD/OGN/PDE9A/SDC1/SDC4/TGFB1/SDC3/CSPG5/BCAN/GPC2/AGRN	19
BP	GO:0030208	dermatan sulfate biosynthetic process	7/246	12/18670	4.74113e-11	6.65946e-09	4.78719e-09	BGN/VCAN/CSPG4/DCN/CSPG5/BCAN/DSEL	7
BP	GO:0018146	keratan sulfate biosynthetic process	9/246	28/18670	5.74297e-11	7.76789e-09	5.584e-09	ACAN/FMOD/CHST6/OMD/OGN/B4GALT6/CHST2/B3GNT3/B3GNT7	9
BP	GO:0030205	dermatan sulfate metabolic process	7/246	13/18670	1.01574e-10	1.32482e-08	9.52353e-09	BGN/VCAN/CSPG4/DCN/CSPG5/BCAN/DSEL	7
BP	GO:0030198	extracellular matrix organization	24/246	368/18670	1.27648e-10	1.60748e-08	1.15555e-08	ACAN/BGN/BMP1/CD44/COL1A1/VCAN/DCN/ELF3/FMOD/MMP11/MMP14/MMP16/PDGFA/PDGFB/PDGFRA/QSOX1/SPP1/TGFB1/TGFBI/POSTN/CSGALNACT1/BCAN/WNT3A/AGRN	24
BP	GO:0042339	keratan sulfate metabolic process	9/246	33/18670	3.02792e-10	3.68598e-08	2.64969e-08	ACAN/FMOD/CHST6/OMD/OGN/B4GALT6/CHST2/B3GNT3/B3GNT7	9
BP	GO:0001503	ossification	24/246	398/18670	6.26748e-10	7.3835e-08	5.30767e-08	AHSG/BMP1/COL1A1/VCAN/FGFR3/FGFR2/GPC3/MMP14/MMP16/MYOC/OMD/PHEX/SHH/SPP1/TGFB1/WNT3/WNT5A/WNT7B/FGF23/SOST/WWOX/CSGALNACT1/FAM20C/WNT3A	24
BP	GO:0044273	sulfur compound catabolic process	10/246	55/18670	2.28467e-09	2.60738e-07	1.87433e-07	ACAN/BGN/VCAN/CSPG4/DCN/FMOD/OMD/OGN/CSPG5/BCAN	10
BP	GO:0072001	renal system development	19/246	293/18670	1.28613e-08	1.42332e-06	1.02316e-06	DCN/EPHA4/FGFR2/GDNF/GPC3/NOTCH3/PDGFA/PDGFB/PDGFRA/SDC1/SDC4/SHH/TGFB1/WNT5A/WNT7B/SPRY1/GCNT4/LRRK2/PCSK9	19
BP	GO:0030207	chondroitin sulfate catabolic process	6/246	14/18670	1.35359e-08	1.45391e-06	1.04515e-06	BGN/VCAN/CSPG4/DCN/CSPG5/BCAN	6
BP	GO:0006688	glycosphingolipid biosynthetic process	7/246	25/18670	2.48602e-08	2.59399e-06	1.8647e-06	ST8SIA4/ST8SIA2/B3GALT2/ST3GAL5/B4GALT6/ST8SIA3/ST6GALNAC5	7
BP	GO:0001822	kidney development	18/246	278/18670	3.21767e-08	3.26415e-06	2.34646e-06	DCN/EPHA4/FGFR2/GDNF/GPC3/NOTCH3/PDGFA/PDGFB/PDGFRA/SDC1/SDC4/SHH/TGFB1/WNT7B/SPRY1/GCNT4/LRRK2/PCSK9	18
BP	GO:0030324	lung development	14/246	172/18670	6.85169e-08	6.7628e-06	4.86148e-06	FGF7/FGFR2/GPC3/MMP14/NOS3/PDGFA/PDGFRA/PHEX/SHH/SREBF1/WNT5A/WNT7B/SPRY1/ABCA12	14
BP	GO:0001655	urogenital system development	19/246	330/18670	8.55878e-08	8.22544e-06	5.91291e-06	DCN/EPHA4/FGFR2/GDNF/GPC3/NOTCH3/PDGFA/PDGFB/PDGFRA/SDC1/SDC4/SHH/TGFB1/WNT5A/WNT7B/SPRY1/GCNT4/LRRK2/PCSK9	19
BP	GO:0030323	respiratory tube development	14/246	176/18670	9.13765e-08	8.55659e-06	6.15096e-06	FGF7/FGFR2/GPC3/MMP14/NOS3/PDGFA/PDGFRA/PHEX/SHH/SREBF1/WNT5A/WNT7B/SPRY1/ABCA12	14
BP	GO:0006790	sulfur compound metabolic process	20/246	372/18670	1.18432e-07	1.08129e-05	7.7729e-06	ACAN/BGN/VCAN/CSPG4/DCN/FMOD/CHST6/OMD/OGN/B4GALT6/CHST2/B3GNT3/CSPG5/CHST11/CSGALNACT1/BCAN/CHST9/DSEL/B3GNT7/CHST13	20
BP	GO:0001574	ganglioside biosynthetic process	5/246	11/18670	1.65156e-07	1.45202e-05	1.04379e-05	ST8SIA4/ST8SIA2/ST3GAL5/B4GALT6/ST8SIA3	5
BP	GO:0016051	carbohydrate biosynthetic process	15/246	214/18670	1.6699e-07	1.45202e-05	1.04379e-05	EXTL1/FUT3/PDGFB/TGFB1/B3GALT2/B3GALT5/B3GNT3/CHST11/CSGALNACT1/ST6GALNAC5/CHST9/B3GNT7/CHST13/B3GNT6/B3GNT8	15
BP	GO:0051961	negative regulation of nervous system development	18/246	315/18670	2.1172e-07	1.79814e-05	1.29261e-05	APOE/CTSC/EPHA4/NOTCH3/SHH/SPP1/SYT4/TGFB1/TLR2/WNT3/WNT5A/WNT7A/ARHGEF2/STMN2/NLGN1/CDK5RAP2/WNT3A/LRRK2	18
BP	GO:0031214	biomineral tissue development	13/246	163/18670	2.57519e-07	2.13741e-05	1.53649e-05	AHSG/COL1A1/FGFR3/FGFR2/GPC3/NOS3/OMD/PHEX/SPP1/TGFB1/FGF23/FAM20A/FAM20C	13
BP	GO:0060541	respiratory system development	14/246	198/18670	3.90694e-07	3.1055e-05	2.23241e-05	FGF7/FGFR2/GPC3/MMP14/NOS3/PDGFA/PDGFRA/PHEX/SHH/SREBF1/WNT5A/WNT7B/SPRY1/ABCA12	14
BP	GO:0007269	neurotransmitter secretion	13/246	169/18670	3.91163e-07	3.1055e-05	2.23241e-05	ASIC1/SLC18A3/SNAP25/SYN1/SYT1/SYT4/WNT7A/STX11/BAIAP3/CSPG5/NLGN1/RPH3A/LRRK2	13
BP	GO:0007030	Golgi organization	12/246	142/18670	4.0169e-07	3.12122e-05	2.24371e-05	PLK3/GOLGA8A/SYNE1/PI4K2A/FHDC1/LRRK2/GOLGA8IP/GOLGA8T/GOLGA8K/GOLGA8M/GOLGA8O/GOLGA8R	12
BP	GO:0099643	signal release from synapse	13/246	170/18670	4.18655e-07	3.18527e-05	2.28975e-05	ASIC1/SLC18A3/SNAP25/SYN1/SYT1/SYT4/WNT7A/STX11/BAIAP3/CSPG5/NLGN1/RPH3A/LRRK2	13
BP	GO:0007596	blood coagulation	18/246	336/18670	5.46206e-07	4.07091e-05	2.9264e-05	APOE/COL1A1/F2R/F7/F10/FLNA/MPL/NOS3/PDGFA/PDGFB/PDGFRA/SERPINA1/PROC/PROS1/RAB27A/SHH/PROZ/WNT3A	18
BP	GO:0051897	positive regulation of protein kinase B signaling	13/246	176/18670	6.23045e-07	4.55072e-05	3.27131e-05	F7/F10/FGF7/FGFR3/FGFR2/HIP1/MYOC/PDGFA/PDGFB/PDGFRA/TGFB1/FGF23/GDF15	13
BP	GO:0060688	regulation of morphogenesis of a branching structure	8/246	56/18670	6.67376e-07	4.75311e-05	3.4168e-05	FGF7/FGFR2/GDNF/PDGFA/SHH/TGFB1/WNT5A/LRRK2	8
BP	GO:0007599	hemostasis	18/246	341/18670	6.76784e-07	4.75311e-05	3.4168e-05	APOE/COL1A1/F2R/F7/F10/FLNA/MPL/NOS3/PDGFA/PDGFB/PDGFRA/SERPINA1/PROC/PROS1/RAB27A/SHH/PROZ/WNT3A	18
BP	GO:0050817	coagulation	18/246	342/18670	7.06082e-07	4.8653e-05	3.49745e-05	APOE/COL1A1/F2R/F7/F10/FLNA/MPL/NOS3/PDGFA/PDGFB/PDGFRA/SERPINA1/PROC/PROS1/RAB27A/SHH/PROZ/WNT3A	18
BP	GO:0010721	negative regulation of cell development	18/246	344/18670	7.68164e-07	5.19506e-05	3.7345e-05	APOE/EPHA4/GBP1/NOTCH3/SHH/SPP1/SYT4/TGFB1/WNT3/WNT5A/WNT7A/ARHGEF2/POSTN/STMN2/NLGN1/CDK5RAP2/WNT3A/LRRK2	18
BP	GO:0045807	positive regulation of endocytosis	12/246	153/18670	8.96664e-07	5.95385e-05	4.27996e-05	AHSG/APOE/CLU/GPC3/HIP1/RAB27A/WNT5A/NLGN1/CLIP3/WNT3A/LRRK2/PCSK9	12
BP	GO:0030193	regulation of blood coagulation	9/246	79/18670	9.53953e-07	6.22114e-05	4.4721e-05	APOE/F2R/F7/NOS3/PDGFA/PDGFB/PDGFRA/PROC/PROS1	9
BP	GO:1900046	regulation of hemostasis	9/246	80/18670	1.06266e-06	6.80846e-05	4.8943e-05	APOE/F2R/F7/NOS3/PDGFA/PDGFB/PDGFRA/PROC/PROS1	9
BP	GO:0001505	regulation of neurotransmitter levels	18/246	354/18670	1.15969e-06	7.29088e-05	5.2411e-05	ASIC1/CLU/GDNF/NOS3/RAB3B/SLC18A3/SNAP25/SYN1/SYT1/SYT4/TLR2/WNT7A/STX11/BAIAP3/CSPG5/NLGN1/RPH3A/LRRK2	18
BP	GO:0017157	regulation of exocytosis	14/246	217/18670	1.17788e-06	7.29088e-05	5.2411e-05	RAB3B/RAB27A/RAB27B/SDC1/SDC4/SYN1/SYT1/SYT4/WNT7A/BAIAP3/CSPG5/NLGN1/LRRK2/RAB15	14
BP	GO:0042476	odontogenesis	11/246	132/18670	1.41537e-06	8.61487e-05	6.19285e-05	COL1A1/FGFR2/PAM/PDGFRA/PHEX/SDC1/SHH/TGFB1/FAM20A/FAM20C/PERP	11
BP	GO:0050818	regulation of coagulation	9/246	84/18670	1.61154e-06	9.64812e-05	6.93561e-05	APOE/F2R/F7/NOS3/PDGFA/PDGFB/PDGFRA/PROC/PROS1	9
BP	GO:0050768	negative regulation of neurogenesis	16/246	295/18670	2.01629e-06	0.000118766	8.53758e-05	APOE/EPHA4/NOTCH3/SHH/SPP1/SYT4/TGFB1/WNT3/WNT5A/WNT7A/ARHGEF2/STMN2/NLGN1/CDK5RAP2/WNT3A/LRRK2	16
BP	GO:0051588	regulation of neurotransmitter transport	11/246	139/18670	2.35621e-06	0.000136586	9.81854e-05	ASIC1/GDNF/RAB3B/SYN1/SYT1/SYT4/WNT7A/BAIAP3/CSPG5/NLGN1/LRRK2	11
BP	GO:0003401	axis elongation	6/246	31/18670	2.75041e-06	0.000156945	0.000112821	FGFR2/SHH/TGFB1/WNT5A/SPRY1/WNT3A	6
BP	GO:1903035	negative regulation of response to wounding	9/246	90/18670	2.8868e-06	0.000162016	0.000116466	APOE/EPHA4/NOS3/PDGFA/PDGFB/PDGFRA/PROC/PROS1/SPP1	9
BP	GO:0009311	oligosaccharide metabolic process	7/246	48/18670	2.94154e-06	0.000162016	0.000116466	FUT3/ST8SIA4/ST8SIA2/B3GALT2/B3GALT5/ST8SIA3/ST6GALNAC5	7
BP	GO:0006836	neurotransmitter transport	15/246	269/18670	3.01672e-06	0.000162016	0.000116466	ASIC1/GDNF/RAB3B/SLC18A3/SNAP25/SYN1/SYT1/SYT4/WNT7A/STX11/BAIAP3/CSPG5/NLGN1/RPH3A/LRRK2	15
BP	GO:0043491	protein kinase B signaling	15/246	269/18670	3.01672e-06	0.000162016	0.000116466	PLK3/F7/F10/FGF7/FGFR3/FGFR2/HIP1/HLA-G/MYOC/PDGFA/PDGFB/PDGFRA/TGFB1/FGF23/GDF15	15
BP	GO:0006672	ceramide metabolic process	9/246	92/18670	3.47082e-06	0.000183702	0.000132055	FUT3/ST8SIA4/ST8SIA2/B3GALT2/ST3GAL5/B4GALT6/ST8SIA3/ASAH2/ACER2	9
BP	GO:0001573	ganglioside metabolic process	5/246	19/18670	3.81301e-06	0.000196128	0.000140988	ST8SIA4/ST8SIA2/ST3GAL5/B4GALT6/ST8SIA3	5
BP	GO:0010544	negative regulation of platelet activation	5/246	19/18670	3.81301e-06	0.000196128	0.000140988	APOE/NOS3/PDGFA/PDGFB/PDGFRA	5
BP	GO:0051896	regulation of protein kinase B signaling	14/246	244/18670	4.66185e-06	0.000236459	0.00016998	F7/F10/FGF7/FGFR3/FGFR2/HIP1/HLA-G/MYOC/PDGFA/PDGFB/PDGFRA/TGFB1/FGF23/GDF15	14
BP	GO:0060602	branch elongation of an epithelium	5/246	20/18670	5.02952e-06	0.000248213	0.00017843	FGFR2/SHH/TGFB1/WNT5A/SPRY1	5
BP	GO:0097503	sialylation	5/246	20/18670	5.02952e-06	0.000248213	0.00017843	ST8SIA4/ST8SIA2/ST3GAL5/ST8SIA3/ST6GALNAC5	5
BP	GO:0030100	regulation of endocytosis	15/246	281/18670	5.13551e-06	0.000250065	0.000179761	AHSG/APOE/CLU/GPC3/HIP1/RAB27A/SYT4/TGFB1/TLR2/WNT5A/NLGN1/CLIP3/WNT3A/LRRK2/PCSK9	15
BP	GO:0030311	poly-N-acetyllactosamine biosynthetic process	4/246	10/18670	5.80414e-06	0.000276165	0.000198523	B3GNT3/B3GNT7/B3GNT6/B3GNT8	4
BP	GO:0030195	negative regulation of blood coagulation	7/246	53/18670	5.82276e-06	0.000276165	0.000198523	APOE/NOS3/PDGFA/PDGFB/PDGFRA/PROC/PROS1	7
BP	GO:1900047	negative regulation of hemostasis	7/246	54/18670	6.6155e-06	0.000309741	0.000222659	APOE/NOS3/PDGFA/PDGFB/PDGFRA/PROC/PROS1	7
BP	GO:0002576	platelet degranulation	10/246	128/18670	7.64706e-06	0.000353507	0.000254121	AHSG/CLU/FLNA/PDGFA/PDGFB/SERPINA1/PROS1/QSOX1/RAB27B/TGFB1	10
BP	GO:0016485	protein processing	16/246	328/18670	7.80684e-06	0.000356382	0.000256188	MYRF/CLU/CD55/F7/LHB/MMP14/MMP16/PCSK6/PCSK1/PROS1/SHH/PCSK1N/PERP/BIRC7/LRRK2/PCSK9	16
BP	GO:0030148	sphingolipid biosynthetic process	9/246	102/18670	8.16334e-06	0.000368056	0.000264579	ST8SIA4/ST8SIA2/B3GALT2/ST3GAL5/B4GALT6/ST8SIA3/ASAH2/ST6GALNAC5/ACER2	9
BP	GO:0000271	polysaccharide biosynthetic process	8/246	78/18670	8.58527e-06	0.000382359	0.000274861	EXTL1/PDGFB/TGFB1/B3GNT3/CSGALNACT1/B3GNT7/B3GNT6/B3GNT8	8
BP	GO:0030309	poly-N-acetyllactosamine metabolic process	4/246	11/18670	9.02642e-06	0.000397163	0.000285503	B3GNT3/B3GNT7/B3GNT6/B3GNT8	4
BP	GO:0050819	negative regulation of coagulation	7/246	57/18670	9.54992e-06	0.000411233	0.000295617	APOE/NOS3/PDGFA/PDGFB/PDGFRA/PROC/PROS1	7
BP	GO:0046928	regulation of neurotransmitter secretion	9/246	104/18670	9.57141e-06	0.000411233	0.000295617	ASIC1/SYN1/SYT1/SYT4/WNT7A/BAIAP3/CSPG5/NLGN1/LRRK2	9
BP	GO:0099504	synaptic vesicle cycle	12/246	194/18670	1.05948e-05	0.00044991	0.00032342	RAB3B/RAB27B/SNAP25/SYN1/SYT1/SYT4/WNT7A/STX11/CSPG5/NLGN1/WNT3A/LRRK2	12
BP	GO:0010769	regulation of cell morphogenesis involved in differentiation	15/246	301/18670	1.17056e-05	0.000491366	0.000353222	APOE/EPHA4/FLNA/GBP1/MPL/MYOC/SPP1/WNT3/WNT5A/WNT7A/POSTN/CSPG5/NLGN1/WNT3A/LRRK2	15
BP	GO:0042340	keratan sulfate catabolic process	4/246	12/18670	1.33996e-05	0.000556083	0.000399744	ACAN/FMOD/OMD/OGN	4
BP	GO:0046513	ceramide biosynthetic process	7/246	61/18670	1.50691e-05	0.000606666	0.000436106	ST8SIA4/ST8SIA2/B3GALT2/ST3GAL5/B4GALT6/ST8SIA3/ASAH2	7
BP	GO:0048645	animal organ formation	7/246	61/18670	1.50691e-05	0.000606666	0.000436106	FGFR2/GDNF/LRP2/SHH/WNT5A/SPRY1/WNT3A	7
BP	GO:0060560	developmental growth involved in morphogenesis	13/246	235/18670	1.51168e-05	0.000606666	0.000436106	APOE/FGFR2/SHH/SPP1/SYT1/SYT4/TGFB1/WNT3/WNT5A/WNT7B/SPRY1/POSTN/WNT3A	13
BP	GO:0072073	kidney epithelium development	10/246	140/18670	1.68499e-05	0.000668867	0.000480819	EPHA4/FGFR2/GDNF/GPC3/SDC1/SDC4/SHH/TGFB1/WNT7B/SPRY1	10
BP	GO:0048608	reproductive structure development	18/246	431/18670	1.76436e-05	0.000692842	0.000498054	DCN/FGFR2/FLNA/LHB/LRP2/MMP14/NOS3/PDGFB/PDGFRA/SDC1/SHH/SPP1/VGF/WNT5A/WNT7A/WNT7B/MAMLD1/RHOBTB3	18
BP	GO:0048705	skeletal system morphogenesis	13/246	239/18670	1.80755e-05	0.000702253	0.000504819	ACAN/BMP1/COL1A1/FGFR3/FGFR2/MMP14/MMP16/PDGFRA/TGFB1/WNT7A/CHST11/WWOX/CSGALNACT1	13
BP	GO:0061458	reproductive system development	18/246	434/18670	1.93499e-05	0.000743852	0.000534723	DCN/FGFR2/FLNA/LHB/LRP2/MMP14/NOS3/PDGFB/PDGFRA/SDC1/SHH/SPP1/VGF/WNT5A/WNT7A/WNT7B/MAMLD1/RHOBTB3	18
BP	GO:0030282	bone mineralization	9/246	114/18670	2.0147e-05	0.000763055	0.000548527	AHSG/FGFR3/FGFR2/GPC3/OMD/PHEX/TGFB1/FGF23/FAM20C	9
BP	GO:0044344	cellular response to fibroblast growth factor stimulus	10/246	143/18670	2.02674e-05	0.000763055	0.000548527	CD44/COL1A1/FGF7/FGFR3/FGFR2/WNT5A/FGF23/SPRY1/POSTN/FAM20C	10
BP	GO:0045921	positive regulation of exocytosis	8/246	88/18670	2.10187e-05	0.000783268	0.000563057	RAB27A/RAB27B/SDC1/SDC4/SYT1/SYT4/NLGN1/RAB15	8
BP	GO:0010256	endomembrane system organization	18/246	438/18670	2.18541e-05	0.000806175	0.000579524	MYRF/CLU/PLK3/F2R/RAB27A/SYT4/BAIAP3/GOLGA8A/SYNE1/PI4K2A/FHDC1/LRRK2/GOLGA8IP/GOLGA8T/GOLGA8K/GOLGA8M/GOLGA8O/GOLGA8R	18
BP	GO:0051216	cartilage development	12/246	209/18670	2.23287e-05	0.00081533	0.000586105	ACAN/BMP1/CD44/COL1A1/FGFR3/TGFB1/TGFBI/WNT5A/WNT7A/WNT7B/CHST11/CSGALNACT1	12
BP	GO:0010463	mesenchymal cell proliferation	6/246	44/18670	2.2851e-05	0.00081533	0.000586105	FGF7/FGFR2/GPC3/PDGFA/SHH/WNT5A	6
BP	GO:0014003	oligodendrocyte development	6/246	44/18670	2.2851e-05	0.00081533	0.000586105	MYRF/CLU/SHH/TGFB1/TLR2/B4GALT6	6
BP	GO:0009247	glycolipid biosynthetic process	7/246	65/18670	2.29953e-05	0.00081533	0.000586105	ST8SIA4/ST8SIA2/B3GALT2/ST3GAL5/B4GALT6/ST8SIA3/ST6GALNAC5	7
BP	GO:1903532	positive regulation of secretion by cell	17/246	399/18670	2.35345e-05	0.000826424	0.00059408	F2R/GDNF/RAB27A/RAB27B/SDC1/SDC4/SPP1/SYT1/SYT4/TGFB1/TLR2/WNT5A/BAIAP3/POSTN/NLGN1/LRRK2/RAB15	17
BP	GO:0022604	regulation of cell morphogenesis	19/246	484/18670	2.42528e-05	0.000843535	0.00060638	APOE/CD44/EPHA4/FLNA/GBP1/MPL/MYOC/SPP1/SYT1/SYT4/WNT3/WNT5A/WNT7A/POSTN/CSPG5/RHOBTB3/NLGN1/WNT3A/LRRK2	19
BP	GO:0001656	metanephros development	8/246	90/18670	2.47812e-05	0.000853784	0.000613748	GDNF/GPC3/PDGFA/PDGFB/PDGFRA/SHH/WNT7B/SPRY1	8
BP	GO:0006687	glycosphingolipid metabolic process	7/246	66/18670	2.54378e-05	0.000854504	0.000614266	ST8SIA4/ST8SIA2/B3GALT2/ST3GAL5/B4GALT6/ST8SIA3/ST6GALNAC5	7
BP	GO:1904888	cranial skeletal system development	7/246	66/18670	2.54378e-05	0.000854504	0.000614266	FGFR2/MMP14/MMP16/PDGFRA/TGFB1/COLEC10/CHST11	7
BP	GO:0006888	ER to Golgi vesicle-mediated transport	12/246	212/18670	2.57087e-05	0.000854504	0.000614266	CTSC/CD55/F7/F10/SERPINA1/PROC/PROS1/PROZ/KDELR3/LRRK2/GOLT1A/TRAPPC3L	12
BP	GO:0061351	neural precursor cell proliferation	10/246	147/18670	2.57381e-05	0.000854504	0.000614266	FGFR2/FLNA/LRP2/SHH/TGFB1/WNT5A/WNT7A/ARHGEF2/WNT3A/LRRK2	10
BP	GO:1903034	regulation of response to wounding	11/246	179/18670	2.63169e-05	0.000865851	0.000622422	APOE/EPHA4/F2R/F7/NOS3/PDGFA/PDGFB/PDGFRA/PROC/PROS1/SPP1	11
BP	GO:0016079	synaptic vesicle exocytosis	9/246	119/18670	2.8399e-05	0.00092601	0.000665668	SNAP25/SYN1/SYT1/SYT4/WNT7A/STX11/CSPG5/NLGN1/LRRK2	9
BP	GO:0001958	endochondral ossification	5/246	28/18670	2.92517e-05	0.000937081	0.000673627	COL1A1/FGFR3/MMP14/MMP16/CSGALNACT1	5
BP	GO:0036075	replacement ossification	5/246	28/18670	2.92517e-05	0.000937081	0.000673627	COL1A1/FGFR3/MMP14/MMP16/CSGALNACT1	5
BP	GO:0072089	stem cell proliferation	9/246	120/18670	3.03538e-05	0.000963932	0.000692929	FGFR2/SHH/TGFB1/WNT3/WNT5A/WNT7B/ARHGEF2/WNT3A/LRRK2	9
BP	GO:0071774	response to fibroblast growth factor	10/246	150/18670	3.06306e-05	0.000964334	0.000693218	CD44/COL1A1/FGF7/FGFR3/FGFR2/WNT5A/FGF23/SPRY1/POSTN/FAM20C	10
BP	GO:0007162	negative regulation of cell adhesion	14/246	289/18670	3.13631e-05	0.000978958	0.00070373	COL1A1/GBP1/HLA-G/MMP14/MUC1/MYOC/SDC4/SHH/TGFB1/TGFBI/POSTN/B4GALNT2/ACER2/MUC21	14
BP	GO:0048489	synaptic vesicle transport	10/246	152/18670	3.43171e-05	0.00105316	0.000757071	RAB27A/SNAP25/SYN1/SYT1/SYT4/WNT7A/STX11/CSPG5/NLGN1/LRRK2	10
BP	GO:0097480	establishment of synaptic vesicle localization	10/246	152/18670	3.43171e-05	0.00105316	0.000757071	RAB27A/SNAP25/SYN1/SYT1/SYT4/WNT7A/STX11/CSPG5/NLGN1/LRRK2	10
BP	GO:0006491	N-glycan processing	4/246	15/18670	3.58166e-05	0.00109002	0.000783566	ST8SIA4/ST8SIA2/MGAT4B/ST8SIA3	4
BP	GO:0030168	platelet activation	10/246	153/18670	3.62985e-05	0.00109555	0.000787546	APOE/COL1A1/F2R/FLNA/MPL/NOS3/PDGFA/PDGFB/PDGFRA/WNT3A	10
BP	GO:0017156	calcium ion regulated exocytosis	10/246	154/18670	3.83768e-05	0.00114879	0.000825813	SNAP25/SYN1/SYT1/SYT4/WNT7A/STX11/BAIAP3/CSPG5/NLGN1/LRRK2	10
BP	GO:0043406	positive regulation of MAP kinase activity	13/246	258/18670	4.01838e-05	0.0011931	0.000857668	CSPG4/EPHA4/F2R/PDGFA/PDGFB/TGFB1/WNT5A/WNT7B/GDF15/TENM1/BIRC7/LRRK2/MUC20	13
BP	GO:0060070	canonical Wnt signaling pathway	15/246	335/18670	4.06823e-05	0.00119816	0.000861304	APOE/COL1A1/FGFR2/GPC3/IGFBP1/IGFBP6/SDC1/SHH/WNT3/WNT5A/WNT7A/WNT7B/SOST/WNT3A/LRRK2	15
BP	GO:0001657	ureteric bud development	8/246	97/18670	4.26898e-05	0.00124723	0.000896576	FGFR2/GDNF/GPC3/SDC1/SDC4/SHH/TGFB1/SPRY1	8
BP	GO:0043405	regulation of MAP kinase activity	15/246	337/18670	4.3541e-05	0.001262	0.000907196	APOE/CSPG4/EPHA4/F2R/PDGFA/PDGFB/TGFB1/WNT5A/WNT7B/GDF15/TENM1/SPRY1/BIRC7/LRRK2/MUC20	15
BP	GO:0023061	signal release	18/246	462/18670	4.39389e-05	0.0012635	0.000908276	ASIC1/KCNS3/SLC18A3/SNAP25/SPP1/SREBF1/SYN1/SYT1/SYT4/VGF/WNT7A/FGF23/STX11/BAIAP3/CSPG5/NLGN1/RPH3A/LRRK2	18
BP	GO:0072163	mesonephric epithelium development	8/246	98/18670	4.59626e-05	0.00128325	0.000922475	FGFR2/GDNF/GPC3/SDC1/SDC4/SHH/TGFB1/SPRY1	8
BP	GO:0072164	mesonephric tubule development	8/246	98/18670	4.59626e-05	0.00128325	0.000922475	FGFR2/GDNF/GPC3/SDC1/SDC4/SHH/TGFB1/SPRY1	8
BP	GO:0001649	osteoblast differentiation	12/246	225/18670	4.60313e-05	0.00128325	0.000922475	COL1A1/VCAN/FGFR2/MYOC/SHH/SPP1/WNT3/WNT7B/FGF23/WWOX/FAM20C/WNT3A	12
BP	GO:0045665	negative regulation of neuron differentiation	12/246	225/18670	4.60313e-05	0.00128325	0.000922475	APOE/EPHA4/NOTCH3/SHH/SPP1/WNT3/WNT5A/STMN2/NLGN1/CDK5RAP2/WNT3A/LRRK2	12
BP	GO:0010543	regulation of platelet activation	5/246	31/18670	4.89673e-05	0.00135476	0.000973878	APOE/NOS3/PDGFA/PDGFB/PDGFRA	5
BP	GO:0006665	sphingolipid metabolic process	10/246	159/18670	5.03629e-05	0.0013829	0.000994104	FUT3/ST8SIA4/ST8SIA2/B3GALT2/ST3GAL5/B4GALT6/ST8SIA3/ASAH2/ST6GALNAC5/ACER2	10
BP	GO:0046661	male sex differentiation	10/246	160/18670	5.31085e-05	0.00143668	0.00103277	FLNA/LHB/LRP2/MMP14/PDGFRA/SDC1/SHH/WNT5A/MAMLD1/RHOBTB3	10
BP	GO:1903305	regulation of regulated secretory pathway	10/246	160/18670	5.31085e-05	0.00143668	0.00103277	RAB27A/SYN1/SYT1/SYT4/WNT7A/BAIAP3/CSPG5/NLGN1/LRRK2/RAB15	10
BP	GO:0051047	positive regulation of secretion	17/246	428/18670	5.66197e-05	0.00152041	0.00109295	F2R/GDNF/RAB27A/RAB27B/SDC1/SDC4/SPP1/SYT1/SYT4/TGFB1/TLR2/WNT5A/BAIAP3/POSTN/NLGN1/LRRK2/RAB15	17
BP	GO:0015012	heparan sulfate proteoglycan biosynthetic process	5/246	32/18670	5.74153e-05	0.00153052	0.00110022	EXTL1/HS3ST4/CSGALNACT1/HS3ST6/HS6ST2	5
BP	GO:0001763	morphogenesis of a branching structure	11/246	196/18670	6.03484e-05	0.00159705	0.00114805	FGF7/FGFR2/GDNF/GPC3/MMP14/PDGFA/SHH/TGFB1/WNT5A/SPRY1/LRRK2	11
BP	GO:0001823	mesonephros development	8/246	102/18670	6.12231e-05	0.00160854	0.00115631	FGFR2/GDNF/GPC3/SDC1/SDC4/SHH/TGFB1/SPRY1	8
BP	GO:0097479	synaptic vesicle localization	10/246	163/18670	6.21237e-05	0.00162054	0.00116494	RAB27A/SNAP25/SYN1/SYT1/SYT4/WNT7A/STX11/CSPG5/NLGN1/LRRK2	10
BP	GO:0061045	negative regulation of wound healing	7/246	76/18670	6.38648e-05	0.00164654	0.00118363	APOE/NOS3/PDGFA/PDGFB/PDGFRA/PROC/PROS1	7
BP	GO:0007548	sex differentiation	13/246	270/18670	6.40221e-05	0.00164654	0.00118363	FLNA/LHB/LRP2/MMP14/NOS3/PDGFRA/SDC1/SHH/VGF/WNT5A/WNT7A/MAMLD1/RHOBTB3	13
BP	GO:0010092	specification of animal organ identity	5/246	33/18670	6.69453e-05	0.00170968	0.00122901	FGFR2/GDNF/LRP2/SPRY1/WNT3A	5
BP	GO:0001523	retinoid metabolic process	8/246	104/18670	7.0306e-05	0.00178304	0.00128175	APOE/GPC3/LRP2/SDC1/SDC4/SDC3/GPC2/AGRN	8
BP	GO:0050804	modulation of chemical synaptic transmission	17/246	436/18670	7.10783e-05	0.00179019	0.00128689	ASIC1/APOE/EPHA4/F2R/GDNF/RAB3B/SNAP25/SYN1/SYT1/SYT4/WNT7A/BAIAP3/CSPG5/NLGN1/CLSTN2/WNT3A/LRRK2	17
BP	GO:0061448	connective tissue development	13/246	273/18670	7.16206e-05	0.0017915	0.00128783	ACAN/BMP1/CD44/COL1A1/FGFR3/PDGFB/TGFB1/TGFBI/WNT5A/WNT7A/WNT7B/CHST11/CSGALNACT1	13
BP	GO:0099177	regulation of trans-synaptic signaling	17/246	437/18670	7.3097e-05	0.00181599	0.00130544	ASIC1/APOE/EPHA4/F2R/GDNF/RAB3B/SNAP25/SYN1/SYT1/SYT4/WNT7A/BAIAP3/CSPG5/NLGN1/CLSTN2/WNT3A/LRRK2	17
BP	GO:0070206	protein trimerization	6/246	54/18670	7.49042e-05	0.00184786	0.00132834	ASIC1/CD247/COL1A1/HLA-G/TRIM22/STEAP4	6
BP	GO:2000300	regulation of synaptic vesicle exocytosis	7/246	78/18670	7.5475e-05	0.00184786	0.00132834	SYN1/SYT1/SYT4/WNT7A/CSPG5/NLGN1/LRRK2	7
BP	GO:0031589	cell-substrate adhesion	15/246	354/18670	7.58977e-05	0.00184786	0.00132834	CD44/COL1A1/EMP2/FAT2/FLNA/GBP1/MMP14/MUC4/MYOC/SDC4/MSLN/POSTN/CSPG5/COL26A1/ACER2	15
BP	GO:0007435	salivary gland morphogenesis	5/246	34/18670	7.76496e-05	0.00187	0.00134426	FGF7/FGFR2/PDGFA/SHH/TGFB1	5
BP	GO:0009312	oligosaccharide biosynthetic process	4/246	18/18670	7.78313e-05	0.00187	0.00134426	FUT3/B3GALT2/B3GALT5/ST6GALNAC5	4
BP	GO:0051604	protein maturation	16/246	397/18670	7.90737e-05	0.00188743	0.00135679	MYRF/CLU/CD55/F7/LHB/MMP14/MMP16/PCSK6/PCSK1/PROS1/SHH/PCSK1N/PERP/BIRC7/LRRK2/PCSK9	16
BP	GO:0008584	male gonad development	9/246	138/18670	9.06367e-05	0.00214938	0.0015451	FLNA/LHB/LRP2/MMP14/PDGFRA/SDC1/WNT5A/MAMLD1/RHOBTB3	9
BP	GO:0032526	response to retinoic acid	8/246	108/18670	9.18482e-05	0.00216406	0.00155565	COL1A1/FGFR2/SREBF1/WNT3/WNT5A/WNT7B/WNT3A/ACER2	8
BP	GO:0043687	post-translational protein modification	15/246	361/18670	9.44001e-05	0.00220993	0.00158862	AHSG/APOE/VCAN/GPC3/IGFBP1/SERPINA1/PROC/QSOX1/SPP1/VGF/FGF23/MSLN/TMEM132A/FAM20C/PCSK9	15
BP	GO:0046546	development of primary male sexual characteristics	9/246	139/18670	9.58158e-05	0.00222879	0.00160218	FLNA/LHB/LRP2/MMP14/PDGFRA/SDC1/WNT5A/MAMLD1/RHOBTB3	9
BP	GO:0099003	vesicle-mediated transport in synapse	11/246	207/18670	9.8461e-05	0.00227582	0.00163599	RAB27A/RAB27B/SNAP25/SYN1/SYT1/SYT4/WNT7A/STX11/CSPG5/NLGN1/LRRK2	11
BP	GO:0016101	diterpenoid metabolic process	8/246	110/18670	0.000104515	0.00240055	0.00172565	APOE/GPC3/LRP2/SDC1/SDC4/SDC3/GPC2/AGRN	8
BP	GO:0052547	regulation of peptidase activity	17/246	452/18670	0.000110063	0.00251218	0.0018059	AHSG/CD44/CRYAB/EPHA4/F2R/GPC3/HIP1/SERPINA1/PROS1/SLPI/TNFRSF10A/PCSK1N/SH3RF1/PERP/BIRC7/WNT3A/ACER2	17
BP	GO:1903362	regulation of cellular protein catabolic process	12/246	247/18670	0.00011235	0.00254437	0.00182903	APOE/CTSC/CLU/PLK3/EPHA4/LRP2/MGAT3/SHH/RNF144A/RHBDF1/LRRK2/PCSK9	12
BP	GO:0046467	membrane lipid biosynthetic process	9/246	142/18670	0.000112866	0.00254437	0.00182903	ST8SIA4/ST8SIA2/B3GALT2/ST3GAL5/B4GALT6/ST8SIA3/ASAH2/ST6GALNAC5/ACER2	9
BP	GO:0048193	Golgi vesicle transport	15/246	368/18670	0.000116728	0.00257338	0.00184989	CTSC/CD55/F7/F10/SERPINA1/PROC/PROS1/PROZ/CYTH3/KDELR3/RAB34/LRRK2/GOLT1A/STEAP2/TRAPPC3L	15
BP	GO:0003156	regulation of animal organ formation	5/246	37/18670	0.000117788	0.00257338	0.00184989	GDNF/SHH/WNT5A/SPRY1/WNT3A	5
BP	GO:0007431	salivary gland development	5/246	37/18670	0.000117788	0.00257338	0.00184989	FGF7/FGFR2/PDGFA/SHH/TGFB1	5
BP	GO:0030201	heparan sulfate proteoglycan metabolic process	5/246	37/18670	0.000117788	0.00257338	0.00184989	EXTL1/HS3ST4/CSGALNACT1/HS3ST6/HS6ST2	5
BP	GO:0017158	regulation of calcium ion-dependent exocytosis	8/246	112/18670	0.000118593	0.00257338	0.00184989	SYN1/SYT1/SYT4/WNT7A/BAIAP3/CSPG5/NLGN1/LRRK2	8
BP	GO:0098693	regulation of synaptic vesicle cycle	8/246	112/18670	0.000118593	0.00257338	0.00184989	RAB3B/SYN1/SYT1/SYT4/WNT7A/CSPG5/NLGN1/LRRK2	8
BP	GO:0030879	mammary gland development	9/246	143/18670	0.000119086	0.00257338	0.00184989	ELF3/FGFR2/PAM/TGFB1/WNT3/WNT5A/WNT7B/ATP2C2/WNT3A	9
BP	GO:0036065	fucosylation	4/246	20/18670	0.000120704	0.00258473	0.00185805	FUT1/FUT2/FUT3/FUT9	4
BP	GO:1902803	regulation of synaptic vesicle transport	7/246	84/18670	0.000121026	0.00258473	0.00185805	SYN1/SYT1/SYT4/WNT7A/CSPG5/NLGN1/LRRK2	7
BP	GO:0051650	establishment of vesicle localization	13/246	290/18670	0.000131239	0.00278653	0.00200312	CTSC/SERPINA1/RAB27A/RAB27B/SNAP25/SYN1/SYT1/SYT4/WNT7A/STX11/CSPG5/NLGN1/LRRK2	13
BP	GO:0006040	amino sugar metabolic process	5/246	38/18670	0.000134188	0.0028167	0.00202481	CHST6/MGAT3/CHST2/CSGALNACT1/B4GALNT2	5
BP	GO:0005976	polysaccharide metabolic process	8/246	114/18670	0.000134202	0.0028167	0.00202481	EXTL1/PDGFB/TGFB1/B3GNT3/CSGALNACT1/B3GNT7/B3GNT6/B3GNT8	8
BP	GO:0010810	regulation of cell-substrate adhesion	11/246	215/18670	0.00013769	0.00285707	0.00205382	COL1A1/EMP2/FLNA/GBP1/MMP14/MYOC/SDC4/POSTN/CSPG5/COL26A1/ACER2	11
BP	GO:0070374	positive regulation of ERK1 and ERK2 cascade	11/246	215/18670	0.00013769	0.00285707	0.00205382	APOE/CD44/F2R/FGFR3/FGFR2/PDGFA/PDGFB/PDGFRA/PLA2G5/TGFB1/FGF23	11
BP	GO:0071902	positive regulation of protein serine/threonine kinase activity	14/246	334/18670	0.000147308	0.00302765	0.00217645	CSPG4/EPHA4/F2R/PDGFA/PDGFB/TGFB1/WNT5A/WNT7B/GDF15/TENM1/FAM20A/BIRC7/LRRK2/MUC20	14
BP	GO:0140058	neuron projection arborization	4/246	21/18670	0.000147569	0.00302765	0.00217645	LRP2/WNT5A/NLGN1/LRRK2	4
BP	GO:0007405	neuroblast proliferation	6/246	61/18670	0.000149132	0.00303018	0.00217827	FGFR2/SHH/TGFB1/ARHGEF2/WNT3A/LRRK2	6
BP	GO:0008406	gonad development	11/246	217/18670	0.000149352	0.00303018	0.00217827	FLNA/LHB/LRP2/MMP14/NOS3/PDGFRA/SDC1/VGF/WNT5A/MAMLD1/RHOBTB3	11
BP	GO:0021782	glial cell development	8/246	116/18670	0.000151469	0.00305616	0.00219694	MYRF/CLU/MYOC/SHH/TGFB1/TLR2/B4GALT6/CSPG5	8
BP	GO:0061041	regulation of wound healing	9/246	148/18670	0.000154654	0.0030956	0.00222529	APOE/F2R/F7/NOS3/PDGFA/PDGFB/PDGFRA/PROC/PROS1	9
BP	GO:0061138	morphogenesis of a branching epithelium	10/246	182/18670	0.000155119	0.0030956	0.00222529	FGF7/FGFR2/GDNF/GPC3/MMP14/PDGFA/SHH/TGFB1/WNT5A/SPRY1	10
BP	GO:2000177	regulation of neural precursor cell proliferation	7/246	88/18670	0.000162239	0.0032201	0.00231479	FLNA/LRP2/SHH/TGFB1/WNT5A/WNT3A/LRRK2	7
BP	GO:0007409	axonogenesis	17/246	468/18670	0.000166713	0.003291	0.00236575	APOE/EPHA4/FGFR2/GDNF/GFRA1/NCAM1/RAP1GAP/SHH/SPP1/WNT3/WNT5A/WNT7A/B4GALT6/LYPLA2/ATP8A2/WNT3A/AGRN	17
BP	GO:0042176	regulation of protein catabolic process	15/246	381/18670	0.000170605	0.00334973	0.00240798	APOE/CTSC/CLU/PLK3/EPHA4/FLNA/GPC3/LRP2/MGAT3/SHH/WNT5A/RNF144A/RHBDF1/LRRK2/PCSK9	15
BP	GO:0090184	positive regulation of kidney development	5/246	40/18670	0.00017218	0.00336258	0.00241721	GDNF/PDGFA/PDGFB/SHH/TGFB1	5
BP	GO:0052548	regulation of endopeptidase activity	16/246	425/18670	0.000173286	0.00336617	0.0024198	AHSG/CD44/CRYAB/EPHA4/F2R/HIP1/SERPINA1/PROS1/SLPI/TNFRSF10A/PCSK1N/SH3RF1/PERP/BIRC7/WNT3A/ACER2	16
BP	GO:0018230	peptidyl-L-cysteine S-palmitoylation	4/246	22/18670	0.000178504	0.0033953	0.00244073	CLIP3/ZDHHC11/GOLGA7B/ZDHHC11B	4
BP	GO:0018231	peptidyl-S-diacylglycerol-L-cysteine biosynthetic process from peptidyl-cysteine	4/246	22/18670	0.000178504	0.0033953	0.00244073	CLIP3/ZDHHC11/GOLGA7B/ZDHHC11B	4
BP	GO:0022010	central nervous system myelination	4/246	22/18670	0.000178504	0.0033953	0.00244073	MYRF/CLU/TLR2/B4GALT6	4
BP	GO:0032291	axon ensheathment in central nervous system	4/246	22/18670	0.000178504	0.0033953	0.00244073	MYRF/CLU/TLR2/B4GALT6	4
BP	GO:0072659	protein localization to plasma membrane	12/246	260/18670	0.000181431	0.00343309	0.0024679	EMP2/FLNA/GBP1/MMP14/RAB3B/TGFB1/ATP2C2/CLIP3/ABCA12/RAB34/WNT3A/RAB15	12
BP	GO:0070372	regulation of ERK1 and ERK2 cascade	13/246	300/18670	0.000183311	0.00345078	0.00248062	APOE/CD44/F2R/FGFR3/FGFR2/GBP1/PDGFA/PDGFB/PDGFRA/PLA2G5/TGFB1/FGF23/SPRY1	13
BP	GO:0045137	development of primary sexual characteristics	11/246	223/18670	0.000189505	0.00354909	0.00255129	FLNA/LHB/LRP2/MMP14/NOS3/PDGFRA/SDC1/VGF/WNT5A/MAMLD1/RHOBTB3	11
BP	GO:0006721	terpenoid metabolic process	8/246	120/18670	0.000191514	0.0035503	0.00255215	APOE/GPC3/LRP2/SDC1/SDC4/SDC3/GPC2/AGRN	8
BP	GO:0022612	gland morphogenesis	8/246	120/18670	0.000191514	0.0035503	0.00255215	ELF3/FGF7/FGFR2/PDGFA/SHH/TGFB1/WNT5A/WNT3A	8
BP	GO:0050769	positive regulation of neurogenesis	17/246	474/18670	0.000193758	0.00357375	0.00256901	APOE/EPHA4/FLNA/LRP2/SHH/SYT1/SYT4/TGFB1/TLR2/WNT3/WNT5A/ARHGEF2/STMN2/NLGN1/ATP8A2/WNT3A/GPC2	17
BP	GO:0031345	negative regulation of cell projection organization	10/246	188/18670	0.000201972	0.00370653	0.00266447	APOE/EPHA4/RAP1GAP/SPP1/WNT3/WNT5A/STMN2/NLGN1/WNT3A/LRRK2	10
BP	GO:0060445	branching involved in salivary gland morphogenesis	4/246	23/18670	0.000213859	0.00390506	0.00280718	FGF7/FGFR2/PDGFA/SHH	4
BP	GO:0010977	negative regulation of neuron projection development	9/246	155/18670	0.000218992	0.0039789	0.00286026	APOE/EPHA4/SPP1/WNT3/WNT5A/STMN2/NLGN1/WNT3A/LRRK2	9
BP	GO:0051648	vesicle localization	13/246	306/18670	0.000222387	0.00402058	0.00289022	CTSC/SERPINA1/RAB27A/RAB27B/SNAP25/SYN1/SYT1/SYT4/WNT7A/STX11/CSPG5/NLGN1/LRRK2	13
BP	GO:0033273	response to vitamin	7/246	93/18670	0.000229007	0.00411986	0.00296159	COL1A1/F7/PHEX/SPP1/TGFB1/FGF23/POSTN	7
BP	GO:0060993	kidney morphogenesis	7/246	94/18670	0.000244696	0.0043758	0.00314557	GDNF/GPC3/SHH/TGFB1/WNT7B/GCNT4/LRRK2	7
BP	GO:0051260	protein homooligomerization	14/246	351/18670	0.000245629	0.0043758	0.00314557	ASIC1/APOE/CD247/CLU/CRYAB/GBP1/HLA-G/KCNJ2/KCNS3/PAM/SYT1/NLGN1/STEAP4/MUC20	14
BP	GO:2001234	negative regulation of apoptotic signaling pathway	11/246	230/18670	0.000247582	0.00438916	0.00315518	BDKRB2/CD44/CLU/GDNF/MUC1/NOS3/TNFRSF10A/ARHGEF2/ASAH2/SH3RF1/LRRK2	11
BP	GO:1990778	protein localization to cell periphery	13/246	311/18670	0.000260208	0.00459072	0.00330007	EMP2/FLNA/GBP1/MMP14/RAB3B/SNAP25/TGFB1/ATP2C2/CLIP3/ABCA12/RAB34/WNT3A/RAB15	13
BP	GO:0048706	embryonic skeletal system development	8/246	126/18670	0.000267562	0.00469778	0.00337703	COL1A1/FGFR2/MMP14/MMP16/PDGFRA/SHH/WNT5A/CHST11	8
BP	GO:0010812	negative regulation of cell-substrate adhesion	6/246	68/18670	0.000272277	0.00473502	0.0034038	COL1A1/GBP1/MMP14/MYOC/POSTN/ACER2	6
BP	GO:0050918	positive chemotaxis	6/246	68/18670	0.000272277	0.00473502	0.0034038	F7/FGF7/GDNF/PDGFB/WNT5A/COLEC10	6
BP	GO:0036465	synaptic vesicle recycling	6/246	69/18670	0.000294962	0.00503635	0.00362041	RAB27B/SYT1/WNT7A/NLGN1/WNT3A/LRRK2	6
BP	GO:0071300	cellular response to retinoic acid	6/246	69/18670	0.000294962	0.00503635	0.00362041	COL1A1/FGFR2/WNT3/WNT5A/WNT7B/WNT3A	6
BP	GO:0010771	negative regulation of cell morphogenesis involved in differentiation	7/246	97/18670	0.000297024	0.00503635	0.00362041	GBP1/SPP1/WNT3/WNT5A/POSTN/NLGN1/WNT3A	7
BP	GO:0002053	positive regulation of mesenchymal cell proliferation	4/246	25/18670	0.000299257	0.00503635	0.00362041	FGFR2/PDGFA/SHH/WNT5A	4
BP	GO:0031069	hair follicle morphogenesis	4/246	25/18670	0.000299257	0.00503635	0.00362041	FGF7/FGFR2/SHH/TMEM79	4
BP	GO:0048103	somatic stem cell division	4/246	25/18670	0.000299257	0.00503635	0.00362041	FGFR2/WNT7A/ARHGEF2/WNT3A	4
BP	GO:1905809	negative regulation of synapse organization	4/246	25/18670	0.000299257	0.00503635	0.00362041	APOE/TLR2/WNT5A/NLGN1	4
BP	GO:0048701	embryonic cranial skeleton morphogenesis	5/246	45/18670	0.000303033	0.00507649	0.00364927	FGFR2/MMP14/MMP16/PDGFRA/CHST11	5
BP	GO:0070371	ERK1 and ERK2 cascade	13/246	317/18670	0.000312738	0.00521516	0.00374895	APOE/CD44/F2R/FGFR3/FGFR2/GBP1/PDGFA/PDGFB/PDGFRA/PLA2G5/TGFB1/FGF23/SPRY1	13
BP	GO:0042157	lipoprotein metabolic process	8/246	130/18670	0.0003308	0.00549127	0.00394744	APOE/MTTP/LYPLA2/CLIP3/ZDHHC11/PCSK9/GOLGA7B/ZDHHC11B	8
BP	GO:2001233	regulation of apoptotic signaling pathway	15/246	406/18670	0.000336768	0.0055533	0.00399202	BDKRB2/CD44/CTSC/CLU/GDNF/MUC1/NOS3/TNFRSF10A/ARHGEF2/DAPK2/WWOX/ASAH2/SH3RF1/LRRK2/RNF183	15
BP	GO:0033692	cellular polysaccharide biosynthetic process	6/246	71/18670	0.000344768	0.0055533	0.00399202	EXTL1/B3GNT3/CSGALNACT1/B3GNT7/B3GNT6/B3GNT8	6
BP	GO:0003093	regulation of glomerular filtration	3/246	11/18670	0.000344825	0.0055533	0.00399202	EMP2/F2R/PDGFB	3
BP	GO:0060174	limb bud formation	3/246	11/18670	0.000344825	0.0055533	0.00399202	FGFR2/SHH/WNT3	3
BP	GO:0030111	regulation of Wnt signaling pathway	14/246	363/18670	0.00034518	0.0055533	0.00399202	APOE/COL1A1/FGFR2/GPC3/IGFBP1/IGFBP6/SHH/TLR2/WNT3/WNT5A/SOST/WWOX/WNT3A/LRRK2	14
BP	GO:0045861	negative regulation of proteolysis	14/246	363/18670	0.00034518	0.0055533	0.00399202	AHSG/CD44/CRYAB/CD55/EPHA4/GPC3/SERPINA1/PROS1/SHH/SLPI/PCSK1N/SH3RF1/BIRC7/LRRK2	14
BP	GO:0045862	positive regulation of proteolysis	14/246	363/18670	0.00034518	0.0055533	0.00399202	APOE/CTSC/CLU/PLK3/EPHA4/F2R/HIP1/MMP14/TNFRSF10A/RNF144A/PERP/WNT3A/LRRK2/ACER2	14
BP	GO:0050808	synapse organization	15/246	408/18670	0.00035466	0.00568078	0.00408366	APOE/EPHA4/F2R/GDNF/SYN1/TLR2/WNT5A/WNT7A/WNT7B/NLGN1/BCAN/CLSTN2/WNT3A/LRRK2/AGRN	15
BP	GO:0042552	myelination	8/246	132/18670	0.000366708	0.00584812	0.00420396	MYRF/CTSC/CLU/MYOC/TGFB1/TLR2/MALL/B4GALT6	8
BP	GO:0061180	mammary gland epithelium development	6/246	72/18670	0.00037202	0.00588764	0.00423237	FGFR2/TGFB1/WNT3/WNT5A/WNT7B/ATP2C2	6
BP	GO:0018198	peptidyl-cysteine modification	5/246	47/18670	0.000372411	0.00588764	0.00423237	RAB3B/CLIP3/ZDHHC11/GOLGA7B/ZDHHC11B	5
BP	GO:0016050	vesicle organization	13/246	325/18670	0.000396661	0.00622951	0.00447812	CTSC/F2R/SERPINA1/RAB27A/SDC1/SDC4/SNAP25/SYT1/SYT4/STX11/BAIAP3/PI4K2A/RAB34	13
BP	GO:0050806	positive regulation of synaptic transmission	9/246	168/18670	0.000397447	0.00622951	0.00447812	APOE/EPHA4/RAB3B/SNAP25/SYT1/WNT7A/BAIAP3/NLGN1/CLSTN2	9
BP	GO:0007272	ensheathment of neurons	8/246	134/18670	0.00040573	0.00626667	0.00450484	MYRF/CTSC/CLU/MYOC/TGFB1/TLR2/MALL/B4GALT6	8
BP	GO:0008366	axon ensheathment	8/246	134/18670	0.00040573	0.00626667	0.00450484	MYRF/CTSC/CLU/MYOC/TGFB1/TLR2/MALL/B4GALT6	8
BP	GO:0021700	developmental maturation	12/246	284/18670	0.000405758	0.00626667	0.00450484	DEFB1/FGFR3/MYOC/SYT4/WNT5A/BAIAP3/B4GALT6/FAM20C/BCAN/TMEM79/LRRK2/AGRN	12
BP	GO:0002021	response to dietary excess	4/246	27/18670	0.000406682	0.00626667	0.00450484	APOE/VGF/GDF15/PCSK1N	4
BP	GO:0035272	exocrine system development	5/246	48/18670	0.000411294	0.00631112	0.00453679	FGF7/FGFR2/PDGFA/SHH/TGFB1	5
BP	GO:0006643	membrane lipid metabolic process	10/246	207/18670	0.000435563	0.00665555	0.00478439	FUT3/ST8SIA4/ST8SIA2/B3GALT2/ST3GAL5/B4GALT6/ST8SIA3/ASAH2/ST6GALNAC5/ACER2	10
BP	GO:0071107	response to parathyroid hormone	3/246	12/18670	0.0004553	0.00687089	0.00493918	PHEX/FGF23/SOST	3
BP	GO:0099550	trans-synaptic signaling, modulating synaptic transmission	3/246	12/18670	0.0004553	0.00687089	0.00493918	F2R/SYT4/CSPG5	3
BP	GO:1904953	Wnt signaling pathway involved in midbrain dopaminergic neuron differentiation	3/246	12/18670	0.0004553	0.00687089	0.00493918	WNT3/WNT5A/WNT3A	3
BP	GO:0035116	embryonic hindlimb morphogenesis	4/246	28/18670	0.000469587	0.00705732	0.0050732	GPC3/SHH/WNT3/WNT7A	4
BP	GO:0071560	cellular response to transforming growth factor beta stimulus	11/246	249/18670	0.00048571	0.00726972	0.00522588	COL1A1/FGFR2/FMOD/TGFB1/WNT5A/WNT7A/GDF15/POSTN/CHST11/WWOX/PMEPA1	11
BP	GO:0042063	gliogenesis	12/246	290/18670	0.000489049	0.00728983	0.00524034	MYRF/CLU/CSPG4/EPHA4/LRP2/MMP14/MYOC/SHH/TGFB1/TLR2/B4GALT6/CSPG5	12
BP	GO:0009948	anterior/posterior axis specification	5/246	50/18670	0.000498164	0.00733587	0.00527344	GPC3/PCSK6/SHH/WNT3/WNT5A	5
BP	GO:0010171	body morphogenesis	5/246	50/18670	0.000498164	0.00733587	0.00527344	COL1A1/GPC3/PDGFRA/TGFB1/WNT3	5
BP	GO:0060425	lung morphogenesis	5/246	50/18670	0.000498164	0.00733587	0.00527344	FGF7/FGFR2/SHH/WNT7B/SPRY1	5
BP	GO:0051963	regulation of synapse assembly	7/246	106/18670	0.00050987	0.00747809	0.00537567	TLR2/WNT5A/WNT7A/NLGN1/CLSTN2/WNT3A/AGRN	7
BP	GO:0032386	regulation of intracellular transport	15/246	423/18670	0.000516877	0.00754006	0.00542022	PLK3/CRYAB/FLNA/SHH/SREBF1/SYN1/SYT1/SYT4/TGFB1/WNT7A/TENM1/CSPG5/NLGN1/LRRK2/PCSK9	15
BP	GO:0006720	isoprenoid metabolic process	8/246	139/18670	0.000518224	0.00754006	0.00542022	APOE/GPC3/LRP2/SDC1/SDC4/SDC3/GPC2/AGRN	8
BP	GO:0048730	epidermis morphogenesis	4/246	29/18670	0.000539125	0.00781304	0.00561645	FGF7/FGFR2/SHH/TMEM79	4
BP	GO:1903364	positive regulation of cellular protein catabolic process	8/246	140/18670	0.000543496	0.00784525	0.00563961	APOE/CTSC/CLU/PLK3/LRP2/RNF144A/LRRK2/PCSK9	8
BP	GO:0048146	positive regulation of fibroblast proliferation	5/246	51/18670	0.000546445	0.00785676	0.00564788	PDGFA/PDGFB/PDGFRA/TGFB1/WNT5A	5
BP	GO:2000027	regulation of animal organ morphogenesis	11/246	253/18670	0.00055482	0.00794589	0.00571195	FGF7/FGFR2/GDNF/GPC3/PDGFA/SHH/TGFB1/WNT5A/WNT7A/SPRY1/WNT3A	11
BP	GO:0045732	positive regulation of protein catabolic process	10/246	214/18670	0.000564934	0.00805913	0.00579336	APOE/CTSC/CLU/PLK3/GPC3/LRP2/WNT5A/RNF144A/LRRK2/PCSK9	10
BP	GO:0060601	lateral sprouting from an epithelium	3/246	13/18670	0.000586143	0.00832916	0.00598747	FGFR2/SHH/WNT5A	3
BP	GO:0071559	response to transforming growth factor beta	11/246	255/18670	0.000592343	0.00838464	0.00602735	COL1A1/FGFR2/FMOD/TGFB1/WNT5A/WNT7A/GDF15/POSTN/CHST11/WWOX/PMEPA1	11
BP	GO:0072006	nephron development	8/246	142/18670	0.000597033	0.00840181	0.00603969	GDNF/GPC3/NOTCH3/PDGFB/PDGFRA/SHH/TGFB1/WNT7B	8
BP	GO:1900024	regulation of substrate adhesion-dependent cell spreading	5/246	52/18670	0.000598157	0.00840181	0.00603969	FLNA/GBP1/MYOC/POSTN/CSPG5	5
BP	GO:0070168	negative regulation of biomineral tissue development	4/246	30/18670	0.000615681	0.00861482	0.00619282	AHSG/NOS3/TGFB1/FGF23	4
BP	GO:0050920	regulation of chemotaxis	10/246	217/18670	0.000629369	0.00870762	0.00625952	F7/PDGFB/PDGFRA/TGFB1/WNT3/WNT5A/CXCL14/DAPK2/MTUS1/WNT3A	10
BP	GO:0060348	bone development	10/246	217/18670	0.000629369	0.00870762	0.00625952	COL1A1/FGFR3/FGFR2/MMP14/MMP16/MYOC/PHEX/TGFB1/CSGALNACT1/FAM20C	10
BP	GO:0030177	positive regulation of Wnt signaling pathway	9/246	179/18670	0.000629466	0.00870762	0.00625952	COL1A1/FGFR2/GPC3/SHH/TLR2/WNT3/WNT5A/WNT3A/LRRK2	9
BP	GO:0006664	glycolipid metabolic process	7/246	110/18670	0.000636876	0.00877687	0.00630931	ST8SIA4/ST8SIA2/B3GALT2/ST3GAL5/B4GALT6/ST8SIA3/ST6GALNAC5	7
BP	GO:0050807	regulation of synapse organization	10/246	218/18670	0.000652151	0.00890111	0.00639862	APOE/EPHA4/TLR2/WNT5A/WNT7A/NLGN1/CLSTN2/WNT3A/LRRK2/AGRN	10
BP	GO:1903307	positive regulation of regulated secretory pathway	5/246	53/18670	0.000653453	0.00890111	0.00639862	RAB27A/SYT1/SYT4/NLGN1/RAB15	5
BP	GO:0022617	extracellular matrix disassembly	6/246	80/18670	0.000655641	0.00890111	0.00639862	BMP1/CD44/MMP11/MMP14/MMP16/TGFB1	6
BP	GO:0140029	exocytic process	6/246	80/18670	0.000655641	0.00890111	0.00639862	RAB3B/SNAP25/SYT1/STX11/NLGN1/RAB15	6
BP	GO:1903509	liposaccharide metabolic process	7/246	111/18670	0.000672247	0.00909276	0.00653639	ST8SIA4/ST8SIA2/B3GALT2/ST3GAL5/B4GALT6/ST8SIA3/ST6GALNAC5	7
BP	GO:0110110	positive regulation of animal organ morphogenesis	6/246	81/18670	0.000700406	0.00943868	0.00678506	FGF7/FGFR2/GDNF/TGFB1/SPRY1/WNT3A	6
BP	GO:0021953	central nervous system neuron differentiation	9/246	183/18670	0.000737336	0.00980176	0.00704605	EPHA4/FGFR2/NPY/SHH/WNT3/WNT5A/WNT7A/B4GALT6/WNT3A	9
BP	GO:0010935	regulation of macrophage cytokine production	3/246	14/18670	0.000738762	0.00980176	0.00704605	HLA-G/TGFB1/WNT5A	3
BP	GO:0035791	platelet-derived growth factor receptor-beta signaling pathway	3/246	14/18670	0.000738762	0.00980176	0.00704605	HIP1/PDGFA/PDGFB	3
BP	GO:0072216	positive regulation of metanephros development	3/246	14/18670	0.000738762	0.00980176	0.00704605	GDNF/PDGFA/PDGFB	3
BP	GO:0015850	organic hydroxy compound transport	11/246	262/18670	0.000740768	0.00980176	0.00704605	APOE/CLU/GDNF/RAB3B/SHH/SPP1/SYT1/SYT4/ABCB11/ABCA12/PCSK9	11
BP	GO:0002223	stimulatory C-type lectin receptor signaling pathway	7/246	113/18670	0.000747654	0.00985716	0.00708588	MUC1/MUC4/MUC5AC/MUC20/MUC19/MUC21/MUC5B	7
BP	GO:0043113	receptor clustering	5/246	55/18670	0.000775422	0.0101865	0.00732261	APOE/FLNA/TGFB1/NLGN1/AGRN	5
BP	GO:0008543	fibroblast growth factor receptor signaling pathway	7/246	114/18670	0.000787787	0.0102125	0.00734132	FGF7/FGFR3/FGFR2/WNT5A/FGF23/SPRY1/FAM20C	7
BP	GO:0060349	bone morphogenesis	7/246	114/18670	0.000787787	0.0102125	0.00734132	COL1A1/FGFR3/FGFR2/MMP14/MMP16/TGFB1/CSGALNACT1	7
BP	GO:0043552	positive regulation of phosphatidylinositol 3-kinase activity	4/246	32/18670	0.000791385	0.0102125	0.00734132	FGFR3/PDGFB/PDGFRA/TGFB1	4
BP	GO:0070207	protein homotrimerization	4/246	32/18670	0.000791385	0.0102125	0.00734132	ASIC1/CD247/HLA-G/STEAP4	4
BP	GO:0071295	cellular response to vitamin	4/246	32/18670	0.000791385	0.0102125	0.00734132	COL1A1/PHEX/FGF23/POSTN	4
BP	GO:0090183	regulation of kidney development	5/246	56/18670	0.000842412	0.0108327	0.00778716	GDNF/PDGFA/PDGFB/SHH/TGFB1	5
BP	GO:0048144	fibroblast proliferation	6/246	84/18670	0.000849004	0.0108792	0.00782056	PDGFA/PDGFB/PDGFRA/TGFB1/WNT5A/WNT7B	6
BP	GO:0016331	morphogenesis of embryonic epithelium	8/246	150/18670	0.00085543	0.0108851	0.00782484	FGFR2/GDNF/LRP2/SDC4/SHH/TGFB1/WNT5A/WNT7B	8
BP	GO:0048754	branching morphogenesis of an epithelial tube	8/246	150/18670	0.00085543	0.0108851	0.00782484	FGFR2/GDNF/GPC3/MMP14/SHH/TGFB1/WNT5A/SPRY1	8
BP	GO:0002220	innate immune response activating cell surface receptor signaling pathway	7/246	116/18670	0.000873153	0.0110721	0.00795922	MUC1/MUC4/MUC5AC/MUC20/MUC19/MUC21/MUC5B	7
BP	GO:0050803	regulation of synapse structure or activity	10/246	227/18670	0.000889556	0.0111858	0.00804095	APOE/EPHA4/TLR2/WNT5A/WNT7A/NLGN1/CLSTN2/WNT3A/LRRK2/AGRN	10
BP	GO:0010464	regulation of mesenchymal cell proliferation	4/246	33/18670	0.000891308	0.0111858	0.00804095	FGFR2/PDGFA/SHH/WNT5A	4
BP	GO:0016486	peptide hormone processing	4/246	33/18670	0.000891308	0.0111858	0.00804095	LHB/PCSK6/PCSK1/PCSK1N	4
BP	GO:0009798	axis specification	6/246	85/18670	0.00090358	0.0112829	0.00811081	GPC3/PCSK6/SHH/WNT3/WNT5A/WNT7A	6
BP	GO:0048008	platelet-derived growth factor receptor signaling pathway	5/246	57/18670	0.000913621	0.0112829	0.00811081	F7/HIP1/PDGFA/PDGFB/PDGFRA	5
BP	GO:0036445	neuronal stem cell division	3/246	15/18670	0.000914499	0.0112829	0.00811081	FGFR2/ARHGEF2/WNT3A	3
BP	GO:0055057	neuroblast division	3/246	15/18670	0.000914499	0.0112829	0.00811081	FGFR2/ARHGEF2/WNT3A	3
BP	GO:2000484	positive regulation of interleukin-8 secretion	3/246	15/18670	0.000914499	0.0112829	0.00811081	F2R/TLR2/WNT5A	3
BP	GO:0001942	hair follicle development	6/246	86/18670	0.000960818	0.0117568	0.00845142	FGF7/FGFR2/PDGFA/SHH/WNT5A/TMEM79	6
BP	GO:0034637	cellular carbohydrate biosynthetic process	6/246	86/18670	0.000960818	0.0117568	0.00845142	EXTL1/B3GNT3/CSGALNACT1/B3GNT7/B3GNT6/B3GNT8	6
BP	GO:0045785	positive regulation of cell adhesion	14/246	403/18670	0.000962561	0.0117568	0.00845142	CD44/CD55/EMP2/FLNA/HLA-G/MYOC/SDC4/SHH/TGFB1/WNT5A/CYTH3/CSPG5/WNT3A/COL26A1	14
BP	GO:0031667	response to nutrient levels	16/246	499/18670	0.000997018	0.0120902	0.00869115	APOE/COL1A1/F7/NPY/PHEX/SPP1/SREBF1/TGFB1/VGF/FGF23/XPR1/GDF15/POSTN/PCSK1N/LRRK2/PCSK9	16
BP	GO:0018345	protein palmitoylation	4/246	34/18670	0.000999796	0.0120902	0.00869115	CLIP3/ZDHHC11/GOLGA7B/ZDHHC11B	4
BP	GO:0031128	developmental induction	4/246	34/18670	0.000999796	0.0120902	0.00869115	GDNF/WNT3/SPRY1/WNT3A	4
BP	GO:0014068	positive regulation of phosphatidylinositol 3-kinase signaling	6/246	87/18670	0.0010208	0.0122631	0.00881539	DCN/F2R/MYOC/PDGFA/PDGFB/PDGFRA	6
BP	GO:0051781	positive regulation of cell division	6/246	87/18670	0.0010208	0.0122631	0.00881539	FGF7/FGFR2/PDGFA/PDGFB/SHH/TGFB1	6
BP	GO:0048839	inner ear development	9/246	192/18670	0.00103573	0.012361	0.0088858	EPHA4/FGFR2/SDC4/SHH/TGFB1/WNT5A/CXCL14/ATP8A2/WNT3A	9
BP	GO:0050731	positive regulation of peptidyl-tyrosine phosphorylation	9/246	192/18670	0.00103573	0.012361	0.0088858	CD44/CSPG4/EPHA4/FGF7/FGFR3/PDGFB/TGFB1/ARHGEF2/WNT3A	9
BP	GO:0022404	molting cycle process	6/246	88/18670	0.00108363	0.0128071	0.00920648	FGF7/FGFR2/PDGFA/SHH/WNT5A/TMEM79	6
BP	GO:0022405	hair cycle process	6/246	88/18670	0.00108363	0.0128071	0.00920648	FGF7/FGFR2/PDGFA/SHH/WNT5A/TMEM79	6
BP	GO:0098773	skin epidermis development	6/246	88/18670	0.00108363	0.0128071	0.00920648	FGF7/FGFR2/PDGFA/SHH/WNT5A/TMEM79	6
BP	GO:0043270	positive regulation of ion transport	11/246	275/18670	0.00109853	0.0129226	0.00928952	APOE/F2R/FLNA/GDNF/KCNJ2/PDGFB/RAB3B/S100A1/SYT4/ATP2C2/ATP8A2	11
BP	GO:0001977	renal system process involved in regulation of blood volume	3/246	16/18670	0.00111463	0.0129226	0.00928952	EMP2/F2R/PDGFB	3
BP	GO:0006004	fucose metabolic process	3/246	16/18670	0.00111463	0.0129226	0.00928952	FUT1/FUT2/FUT9	3
BP	GO:0010934	macrophage cytokine production	3/246	16/18670	0.00111463	0.0129226	0.00928952	HLA-G/TGFB1/WNT5A	3
BP	GO:0060572	morphogenesis of an epithelial bud	3/246	16/18670	0.00111463	0.0129226	0.00928952	FGFR2/SHH/WNT5A	3
BP	GO:1990000	amyloid fibril formation	3/246	16/18670	0.00111463	0.0129226	0.00928952	APOE/CLU/CRYAB	3
BP	GO:0007411	axon guidance	11/246	276/18670	0.00113111	0.0130722	0.00939701	EPHA4/GDNF/GFRA1/NCAM1/RAP1GAP/SHH/WNT3/WNT5A/LYPLA2/WNT3A/AGRN	11
BP	GO:0006869	lipid transport	13/246	365/18670	0.00116099	0.0133732	0.00961344	APOE/BDKRB2/CLU/MTTP/PLA2G5/SHH/SPP1/ABCB11/ATP11A/ABCA6/ABCA12/ATP8A2/PCSK9	13
BP	GO:0097485	neuron projection guidance	11/246	277/18670	0.00116448	0.0133732	0.00961344	EPHA4/GDNF/GFRA1/NCAM1/RAP1GAP/SHH/WNT3/WNT5A/LYPLA2/WNT3A/AGRN	11
BP	GO:0060562	epithelial tube morphogenesis	12/246	322/18670	0.0012163	0.0139019	0.00999348	EPHA4/FGFR2/GDNF/GPC3/LRP2/MMP14/SDC4/SHH/TGFB1/WNT5A/SPRY1/WNT3A	12
BP	GO:0030901	midbrain development	6/246	90/18670	0.00121813	0.0139019	0.00999348	FGFR2/S100A1/SHH/WNT3/WNT5A/WNT3A	6
BP	GO:0035137	hindlimb morphogenesis	4/246	36/18670	0.00124402	0.0140655	0.0101111	GPC3/SHH/WNT3/WNT7A	4
BP	GO:0060428	lung epithelium development	4/246	36/18670	0.00124402	0.0140655	0.0101111	FGF7/FGFR2/SHH/WNT7B	4
BP	GO:0090218	positive regulation of lipid kinase activity	4/246	36/18670	0.00124402	0.0140655	0.0101111	FGFR3/PDGFB/PDGFRA/TGFB1	4
BP	GO:0010976	positive regulation of neuron projection development	11/246	281/18670	0.00130621	0.014723	0.0105837	APOE/EPHA4/SYT1/SYT4/WNT3/WNT5A/STMN2/NLGN1/ATP8A2/WNT3A/GPC2	11
BP	GO:2000116	regulation of cysteine-type endopeptidase activity	10/246	239/18670	0.00131229	0.0147461	0.0106003	CD44/CRYAB/F2R/HIP1/TNFRSF10A/SH3RF1/PERP/BIRC7/WNT3A/ACER2	10
BP	GO:0050866	negative regulation of cell activation	9/246	199/18670	0.00132989	0.0148785	0.0106955	APOE/HLA-G/NOS3/PDGFA/PDGFB/PDGFRA/SDC4/SHH/TGFB1	9
BP	GO:0009880	embryonic pattern specification	5/246	62/18670	0.00133874	0.0148785	0.0106955	FGFR2/PCSK6/SHH/WNT5A/WNT7A	5
BP	GO:0035988	chondrocyte proliferation	3/246	17/18670	0.00134037	0.0148785	0.0106955	FGFR3/MMP14/MMP16	3
BP	GO:1904948	midbrain dopaminergic neuron differentiation	3/246	17/18670	0.00134037	0.0148785	0.0106955	WNT3/WNT5A/WNT3A	3
BP	GO:0051346	negative regulation of hydrolase activity	15/246	466/18670	0.00137249	0.0151403	0.0108837	AHSG/CD44/CRYAB/GPC3/NOS3/SERPINA1/PROS1/SLPI/PKMYT1/SPRY1/PPP1R15A/PCSK1N/SH3RF1/BIRC7/LRRK2	15
BP	GO:0033280	response to vitamin D	4/246	37/18670	0.00138053	0.0151403	0.0108837	PHEX/SPP1/TGFB1/FGF23	4
BP	GO:0060323	head morphogenesis	4/246	37/18670	0.00138053	0.0151403	0.0108837	COL1A1/PDGFRA/TGFB1/WNT3	4
BP	GO:0071542	dopaminergic neuron differentiation	4/246	37/18670	0.00138053	0.0151403	0.0108837	SHH/WNT3/WNT5A/WNT3A	4
BP	GO:0090092	regulation of transmembrane receptor protein serine/threonine kinase signaling pathway	10/246	241/18670	0.00139649	0.0152695	0.0109765	GPC3/LRP2/PCSK6/SHH/TGFB1/WNT5A/GDF15/CHST11/SOST/PMEPA1	10
BP	GO:0034394	protein localization to cell surface	5/246	63/18670	0.00143876	0.0156379	0.0112414	CD247/EMP2/FGF7/FLNA/ABCA12	5
BP	GO:0035418	protein localization to synapse	5/246	63/18670	0.00143876	0.0156379	0.0112414	RAB27B/SNAP25/WNT5A/WNT7A/NLGN1	5
BP	GO:0060828	regulation of canonical Wnt signaling pathway	11/246	286/18670	0.00150301	0.0162878	0.0117086	APOE/COL1A1/FGFR2/GPC3/IGFBP1/IGFBP6/SHH/WNT5A/SOST/WNT3A/LRRK2	11
BP	GO:0070167	regulation of biomineral tissue development	6/246	94/18670	0.00152513	0.0164035	0.0117918	AHSG/NOS3/OMD/TGFB1/FGF23/FAM20C	6
BP	GO:0030278	regulation of ossification	9/246	203/18670	0.0015261	0.0164035	0.0117918	AHSG/FGFR2/OMD/TGFB1/WNT5A/WNT7B/FGF23/SOST/FAM20C	9
BP	GO:0051590	positive regulation of neurotransmitter transport	4/246	38/18670	0.00152716	0.0164035	0.0117918	RAB3B/SYT1/BAIAP3/NLGN1	4
BP	GO:0048278	vesicle docking	5/246	64/18670	0.00154417	0.0165376	0.0118882	RAB3B/SNAP25/SYT1/STX11/RAB15	5
BP	GO:0050708	regulation of protein secretion	15/246	472/18670	0.00155564	0.0166117	0.0119414	APOE/F2R/GBP1/KCNS3/PAM/SNAP25/SREBF1/SYT4/TGFB1/TLR2/WNT5A/BAIAP3/POSTN/RHBDF1/LRRK2	15
BP	GO:0071695	anatomical structure maturation	8/246	165/18670	0.00157761	0.0167483	0.0120396	FGFR3/MYOC/WNT5A/B4GALT6/FAM20C/TMEM79/LRRK2/AGRN	8
BP	GO:2001242	regulation of intrinsic apoptotic signaling pathway	8/246	165/18670	0.00157761	0.0167483	0.0120396	BDKRB2/CD44/CLU/MUC1/ARHGEF2/DAPK2/LRRK2/RNF183	8
BP	GO:0031065	positive regulation of histone deacetylation	3/246	18/18670	0.00159288	0.0167643	0.0120511	SREBF1/TGFB1/LRRK2	3
BP	GO:0048557	embryonic digestive tract morphogenesis	3/246	18/18670	0.00159288	0.0167643	0.0120511	FGFR2/PDGFRA/SHH	3
BP	GO:0097094	craniofacial suture morphogenesis	3/246	18/18670	0.00159288	0.0167643	0.0120511	MMP14/MMP16/TGFB1	3
BP	GO:0097193	intrinsic apoptotic signaling pathway	11/246	289/18670	0.00163232	0.01713	0.012314	BDKRB2/CD44/CLU/MUC1/ARHGEF2/DAPK2/PPP1R15A/WWOX/PERP/LRRK2/RNF183	11
BP	GO:0090288	negative regulation of cellular response to growth factor stimulus	8/246	166/18670	0.00163905	0.0171514	0.0123294	DCN/LRP2/TGFB1/WNT5A/SPRY1/CHST11/SOST/PMEPA1	8
BP	GO:0048568	embryonic organ development	14/246	428/18670	0.00169679	0.0177048	0.0127272	FGFR2/GDNF/MMP14/MMP16/PDGFA/PDGFB/PDGFRA/SHH/TGFB1/WNT5A/WNT7B/CHST11/ATP8A2/WNT3A	14
BP	GO:0051302	regulation of cell division	8/246	168/18670	0.00176763	0.01837	0.0132054	PLK3/FGF7/FGFR2/PDGFA/PDGFB/SHH/TGFB1/KIF20A	8
BP	GO:0090287	regulation of cellular response to growth factor stimulus	11/246	292/18670	0.0017706	0.01837	0.0132054	DCN/GPC3/LRP2/PCSK6/TGFB1/WNT5A/SPRY1/CHST11/SOST/PMEPA1/FAM20C	11
BP	GO:0031346	positive regulation of cell projection organization	13/246	383/18670	0.00178212	0.0184371	0.0132536	APOE/EPHA4/SYT1/SYT4/WNT3/WNT5A/TENM1/STMN2/NLGN1/ATP8A2/WNT3A/GPC2/AGRN	13
BP	GO:0048709	oligodendrocyte differentiation	6/246	97/18670	0.00179156	0.0184825	0.0132862	MYRF/CLU/SHH/TGFB1/TLR2/B4GALT6	6
BP	GO:0071229	cellular response to acid chemical	9/246	209/18670	0.00186341	0.019056	0.0136985	COL1A1/FGFR2/PDGFB/PDGFRA/SREBF1/WNT3/WNT5A/WNT7B/WNT3A	9
BP	GO:0006044	N-acetylglucosamine metabolic process	3/246	19/18670	0.00187325	0.019056	0.0136985	CHST6/MGAT3/CHST2	3
BP	GO:0036342	post-anal tail morphogenesis	3/246	19/18670	0.00187325	0.019056	0.0136985	WNT5A/CHST11/WNT3A	3
BP	GO:1902074	response to salt	3/246	19/18670	0.00187325	0.019056	0.0136985	PHEX/TGFB1/FGF23	3
BP	GO:1990182	exosomal secretion	3/246	19/18670	0.00187325	0.019056	0.0136985	RAB27A/SDC1/SDC4	3
BP	GO:0099175	regulation of postsynapse organization	6/246	98/18670	0.00188777	0.0190974	0.0137283	APOE/EPHA4/WNT5A/WNT7A/NLGN1/LRRK2	6
BP	GO:2001243	negative regulation of intrinsic apoptotic signaling pathway	6/246	98/18670	0.00188777	0.0190974	0.0137283	BDKRB2/CD44/CLU/MUC1/ARHGEF2/LRRK2	6
BP	GO:0007163	establishment or maintenance of cell polarity	9/246	210/18670	0.00192501	0.0193591	0.0139164	SHH/WNT5A/WNT7A/WNT7B/ARHGEF2/CYTH3/SPRY1/RHOBTB3/CDK5RAP2	9
BP	GO:0009612	response to mechanical stimulus	9/246	210/18670	0.00192501	0.0193591	0.0139164	COL1A1/DCN/KCNJ2/MMP14/TGFB1/TNFRSF10A/POSTN/SOST/ATP8A2	9
BP	GO:0048732	gland development	14/246	434/18670	0.00192955	0.0193591	0.0139164	ELF3/FGF7/FGFR2/PAM/PDGFA/PDGFRA/SHH/TGFB1/WNT3/WNT5A/WNT7B/ATP2C2/WNT3A/PCSK9	14
BP	GO:0032355	response to estradiol	7/246	134/18670	0.00201423	0.0201533	0.0144873	COL1A1/CRYAB/F7/PAM/TGFB1/WNT7A/POSTN	7
BP	GO:0001101	response to acid chemical	12/246	343/18670	0.00206609	0.0206157	0.0148197	COL1A1/F7/FGFR2/PDGFB/PDGFRA/SREBF1/TLR2/WNT3/WNT5A/WNT7B/WNT3A/ACER2	12
BP	GO:0030010	establishment of cell polarity	7/246	135/18670	0.00210106	0.0209075	0.0150295	SHH/WNT5A/WNT7A/ARHGEF2/CYTH3/SPRY1/CDK5RAP2	7
BP	GO:0050730	regulation of peptidyl-tyrosine phosphorylation	10/246	256/18670	0.00217835	0.0214215	0.015399	CD44/CSPG4/EPHA4/FGF7/FGFR3/PDGFA/PDGFB/TGFB1/ARHGEF2/WNT3A	10
BP	GO:0001502	cartilage condensation	3/246	20/18670	0.00218252	0.0214215	0.015399	ACAN/BMP1/WNT7A	3
BP	GO:0032462	regulation of protein homooligomerization	3/246	20/18670	0.00218252	0.0214215	0.015399	APOE/CLU/CRYAB	3
BP	GO:0048670	regulation of collateral sprouting	3/246	20/18670	0.00218252	0.0214215	0.015399	SPP1/WNT3/WNT3A	3
BP	GO:0097734	extracellular exosome biogenesis	3/246	20/18670	0.00218252	0.0214215	0.015399	RAB27A/SDC1/SDC4	3
BP	GO:1903050	regulation of proteolysis involved in cellular protein catabolic process	9/246	214/18670	0.0021879	0.0214215	0.015399	APOE/CTSC/CLU/PLK3/EPHA4/SHH/RNF144A/RHBDF1/LRRK2	9
BP	GO:0017145	stem cell division	4/246	42/18670	0.0022225	0.021702	0.0156006	FGFR2/WNT7A/ARHGEF2/WNT3A	4
BP	GO:0043281	regulation of cysteine-type endopeptidase activity involved in apoptotic process	9/246	215/18670	0.0022579	0.0219889	0.0158069	CD44/CRYAB/F2R/HIP1/TNFRSF10A/SH3RF1/BIRC7/WNT3A/ACER2	9
BP	GO:0048638	regulation of developmental growth	12/246	347/18670	0.00227315	0.0220786	0.0158713	APOE/FGFR3/FGFR2/SPP1/SYT1/SYT4/WNT3/WNT5A/GDF15/ATP8A2/WNT3A/AGRN	12
BP	GO:0031644	regulation of neurological system process	7/246	137/18670	0.00228338	0.0221191	0.0159005	MYRF/CTSC/F2R/NOS3/WNT7A/NLGN1/LRRK2	7
BP	GO:0001953	negative regulation of cell-matrix adhesion	4/246	43/18670	0.00242543	0.0233415	0.0167792	MMP14/MYOC/POSTN/ACER2	4
BP	GO:0099054	presynapse assembly	4/246	43/18670	0.00242543	0.0233415	0.0167792	WNT5A/WNT7A/NLGN1/WNT3A	4
BP	GO:0044264	cellular polysaccharide metabolic process	6/246	103/18670	0.00242874	0.0233415	0.0167792	EXTL1/B3GNT3/CSGALNACT1/B3GNT7/B3GNT6/B3GNT8	6
BP	GO:0031333	negative regulation of protein complex assembly	7/246	139/18670	0.00247768	0.023674	0.0170182	CLU/CRYAB/ARHGEF2/STMN2/CLIP3/SOST/PMEPA1	7
BP	GO:0010001	glial cell differentiation	9/246	218/18670	0.00247864	0.023674	0.0170182	MYRF/CLU/EPHA4/MYOC/SHH/TGFB1/TLR2/B4GALT6/CSPG5	9
BP	GO:0003002	regionalization	12/246	351/18670	0.00249688	0.023674	0.0170182	FGFR2/GDNF/GPC3/LRP2/PCSK6/SHH/WNT3/WNT5A/WNT7A/WNT7B/SPRY1/WNT3A	12
BP	GO:0001956	positive regulation of neurotransmitter secretion	3/246	21/18670	0.00252168	0.023674	0.0170182	SYT1/BAIAP3/NLGN1	3
BP	GO:0003094	glomerular filtration	3/246	21/18670	0.00252168	0.023674	0.0170182	EMP2/F2R/PDGFB	3
BP	GO:0051900	regulation of mitochondrial depolarization	3/246	21/18670	0.00252168	0.023674	0.0170182	DCN/MYOC/LRRK2	3
BP	GO:0072111	cell proliferation involved in kidney development	3/246	21/18670	0.00252168	0.023674	0.0170182	GPC3/PDGFB/SHH	3
BP	GO:0098743	cell aggregation	3/246	21/18670	0.00252168	0.023674	0.0170182	ACAN/BMP1/WNT7A	3
BP	GO:1902473	regulation of protein localization to synapse	3/246	21/18670	0.00252168	0.023674	0.0170182	WNT5A/WNT7A/NLGN1	3
BP	GO:0043583	ear development	9/246	219/18670	0.00255592	0.0239339	0.017205	EPHA4/FGFR2/SDC4/SHH/TGFB1/WNT5A/CXCL14/ATP8A2/WNT3A	9
BP	GO:0010466	negative regulation of peptidase activity	10/246	262/18670	0.00257607	0.0240609	0.0172963	AHSG/CD44/CRYAB/GPC3/SERPINA1/PROS1/SLPI/PCSK1N/SH3RF1/BIRC7	10
BP	GO:0010876	lipid localization	13/246	400/18670	0.00259982	0.0241871	0.017387	APOE/BDKRB2/CLU/MTTP/PLA2G5/SHH/SPP1/ABCB11/ATP11A/ABCA6/ABCA12/ATP8A2/PCSK9	13
BP	GO:0051155	positive regulation of striated muscle cell differentiation	5/246	72/18670	0.00260283	0.0241871	0.017387	MMP14/SHH/TGFB1/GDF15/WNT3A	5
BP	GO:0048736	appendage development	8/246	179/18670	0.002624	0.0241991	0.0173957	FGFR2/GPC3/PAM/SHH/WNT3/WNT5A/WNT7A/CHST11	8
BP	GO:0048771	tissue remodeling	8/246	179/18670	0.002624	0.0241991	0.0173957	BGN/CSPG4/ELF3/F2R/MMP14/NOS3/SPP1/TGFB1	8
BP	GO:0060173	limb development	8/246	179/18670	0.002624	0.0241991	0.0173957	FGFR2/GPC3/PAM/SHH/WNT3/WNT5A/WNT7A/CHST11	8
BP	GO:0010975	regulation of neuron projection development	15/246	499/18670	0.00265318	0.0243452	0.0175007	APOE/EPHA4/SNAP25/SPP1/SYT1/SYT4/WNT3/WNT5A/WNT7A/STMN2/NLGN1/ATP8A2/WNT3A/LRRK2/GPC2	15
BP	GO:0050900	leukocyte migration	15/246	499/18670	0.00265318	0.0243452	0.0175007	CD44/COL1A1/F7/MMP14/PDGFB/PROS1/SDC1/SDC4/TGFB1/WNT5A/TNFRSF10A/CXCL14/SDC3/DAPK2/MTUS1	15
BP	GO:0002791	regulation of peptide secretion	15/246	500/18670	0.00270375	0.0247314	0.0177783	APOE/F2R/GBP1/KCNS3/PAM/SNAP25/SREBF1/SYT4/TGFB1/TLR2/WNT5A/BAIAP3/POSTN/RHBDF1/LRRK2	15
BP	GO:0071346	cellular response to interferon-gamma	8/246	180/18670	0.00271557	0.0247314	0.0177783	CD44/GBP1/GBP3/HLA-G/NCAM1/TLR2/WNT5A/TRIM22	8
BP	GO:1905330	regulation of morphogenesis of an epithelium	8/246	180/18670	0.00271557	0.0247314	0.0177783	FGF7/GDNF/GPC3/PDGFA/SHH/TGFB1/WNT5A/WNT7A	8
BP	GO:0060350	endochondral bone morphogenesis	5/246	73/18670	0.00276473	0.0251164	0.0180551	COL1A1/FGFR3/MMP14/MMP16/CSGALNACT1	5
BP	GO:1902904	negative regulation of supramolecular fiber organization	7/246	142/18670	0.0027927	0.0253076	0.0181925	APOE/CLU/CRYAB/MYOC/ARHGEF2/STMN2/CLIP3	7
BP	GO:0051147	regulation of muscle cell differentiation	8/246	181/18670	0.00280963	0.0253979	0.0182575	CDH15/FGFR2/MMP14/PDGFB/SHH/TGFB1/GDF15/WNT3A	8
BP	GO:0001759	organ induction	3/246	22/18670	0.00289166	0.0258199	0.0185608	GDNF/SPRY1/WNT3A	3
BP	GO:0031629	synaptic vesicle fusion to presynaptic active zone membrane	3/246	22/18670	0.00289166	0.0258199	0.0185608	SNAP25/SYT1/STX11	3
BP	GO:0090312	positive regulation of protein deacetylation	3/246	22/18670	0.00289166	0.0258199	0.0185608	SREBF1/TGFB1/LRRK2	3
BP	GO:0097205	renal filtration	3/246	22/18670	0.00289166	0.0258199	0.0185608	EMP2/F2R/PDGFB	3
BP	GO:0140112	extracellular vesicle biogenesis	3/246	22/18670	0.00289166	0.0258199	0.0185608	RAB27A/SDC1/SDC4	3
BP	GO:0051341	regulation of oxidoreductase activity	6/246	107/18670	0.00293944	0.0261825	0.0188215	APOE/GDNF/NOS3/S100A1/FGF23/LRRK2	6
BP	GO:0007160	cell-matrix adhesion	9/246	225/18670	0.0030606	0.0271954	0.0195496	CD44/EMP2/MMP14/MUC4/MYOC/SDC4/MSLN/POSTN/ACER2	9
BP	GO:0060443	mammary gland morphogenesis	4/246	46/18670	0.00311	0.0273699	0.019675	ELF3/FGFR2/TGFB1/WNT5A	4
BP	GO:0099172	presynapse organization	4/246	46/18670	0.00311	0.0273699	0.019675	WNT5A/WNT7A/NLGN1/WNT3A	4
BP	GO:0015914	phospholipid transport	5/246	75/18670	0.00311022	0.0273699	0.019675	APOE/MTTP/ATP11A/ABCA12/ATP8A2	5
BP	GO:0032482	Rab protein signal transduction	5/246	75/18670	0.00311022	0.0273699	0.019675	RAB3B/RAB27A/RAB27B/RAB34/RAB15	5
BP	GO:0051149	positive regulation of muscle cell differentiation	6/246	109/18670	0.003223	0.0282943	0.0203395	CDH15/MMP14/SHH/TGFB1/GDF15/WNT3A	6
BP	GO:0018108	peptidyl-tyrosine phosphorylation	12/246	363/18670	0.00327806	0.0285077	0.020493	CD44/CSPG4/EPHA4/FGF7/FGFR3/FGFR2/PDGFA/PDGFB/PDGFRA/TGFB1/ARHGEF2/WNT3A	12
BP	GO:0051882	mitochondrial depolarization	3/246	23/18670	0.00329333	0.0285077	0.020493	DCN/MYOC/LRRK2	3
BP	GO:0072215	regulation of metanephros development	3/246	23/18670	0.00329333	0.0285077	0.020493	GDNF/PDGFA/PDGFB	3
BP	GO:0099500	vesicle fusion to plasma membrane	3/246	23/18670	0.00329333	0.0285077	0.020493	SNAP25/SYT1/STX11	3
BP	GO:1902254	negative regulation of intrinsic apoptotic signaling pathway by p53 class mediator	3/246	23/18670	0.00329333	0.0285077	0.020493	BDKRB2/CD44/MUC1	3
BP	GO:0030500	regulation of bone mineralization	5/246	76/18670	0.00329416	0.0285077	0.020493	AHSG/OMD/TGFB1/FGF23/FAM20C	5
BP	GO:0001667	ameboidal-type cell migration	14/246	461/18670	0.00332995	0.0287494	0.0206667	APOE/DCN/EMP2/FAT2/FGF7/GDNF/GPC3/NOS3/PDGFB/SDC4/SHH/TGFB1/WNT5A/WNT7A	14
BP	GO:0042551	neuron maturation	4/246	47/18670	0.00336466	0.0288444	0.020735	MYOC/B4GALT6/LRRK2/AGRN	4
BP	GO:0048806	genitalia development	4/246	47/18670	0.00336466	0.0288444	0.020735	LRP2/PDGFRA/SHH/WNT5A	4
BP	GO:0050435	amyloid-beta metabolic process	4/246	47/18670	0.00336466	0.0288444	0.020735	APOE/CLU/EPHA4/MGAT3	4
BP	GO:0032102	negative regulation of response to external stimulus	12/246	365/18670	0.00342565	0.0292985	0.0210614	APOE/EPHA4/NOS3/PDGFA/PDGFB/PDGFRA/PROC/PROS1/SPP1/WNT3/WNT5A/WNT3A	12
BP	GO:0018212	peptidyl-tyrosine modification	12/246	366/18670	0.00350144	0.0297073	0.0213553	CD44/CSPG4/EPHA4/FGF7/FGFR3/FGFR2/PDGFA/PDGFB/PDGFRA/TGFB1/ARHGEF2/WNT3A	12
BP	GO:0035107	appendage morphogenesis	7/246	148/18670	0.00351412	0.0297073	0.0213553	FGFR2/GPC3/SHH/WNT3/WNT5A/WNT7A/CHST11	7
BP	GO:0035108	limb morphogenesis	7/246	148/18670	0.00351412	0.0297073	0.0213553	FGFR2/GPC3/SHH/WNT3/WNT5A/WNT7A/CHST11	7
BP	GO:0035148	tube formation	7/246	148/18670	0.00351412	0.0297073	0.0213553	FGFR2/GDNF/LRP2/SDC4/SHH/TGFB1/WNT5A	7
BP	GO:0051668	localization within membrane	7/246	148/18670	0.00351412	0.0297073	0.0213553	APOE/FLNA/HIP1/SNAP25/TGFB1/NLGN1/AGRN	7
BP	GO:0001774	microglial cell activation	4/246	48/18670	0.00363315	0.0303621	0.021826	CTSC/CLU/TLR2/LRRK2	4
BP	GO:0002269	leukocyte activation involved in inflammatory response	4/246	48/18670	0.00363315	0.0303621	0.021826	CTSC/CLU/TLR2/LRRK2	4
BP	GO:0051150	regulation of smooth muscle cell differentiation	4/246	48/18670	0.00363315	0.0303621	0.021826	FGFR2/PDGFB/SHH/TGFB1	4
BP	GO:0060324	face development	4/246	48/18670	0.00363315	0.0303621	0.021826	COL1A1/PDGFRA/TGFB1/WNT5A	4
BP	GO:1903727	positive regulation of phospholipid metabolic process	4/246	48/18670	0.00363315	0.0303621	0.021826	FGFR3/PDGFB/PDGFRA/TGFB1	4
BP	GO:0006487	protein N-linked glycosylation	5/246	78/18670	0.00368532	0.0303863	0.0218434	MGAT3/B3GALT2/B3GALT5/MGAT4B/B4GALNT2	5
BP	GO:0021954	central nervous system neuron development	5/246	78/18670	0.00368532	0.0303863	0.0218434	EPHA4/FGFR2/NPY/WNT5A/B4GALT6	5
BP	GO:0072332	intrinsic apoptotic signaling pathway by p53 class mediator	5/246	78/18670	0.00368532	0.0303863	0.0218434	BDKRB2/CD44/MUC1/WWOX/PERP	5
BP	GO:0031109	microtubule polymerization or depolymerization	6/246	112/18670	0.00368596	0.0303863	0.0218434	CRYAB/ARHGEF2/STMN2/TPPP/CLIP3/CDK5RAP2	6
BP	GO:0042303	molting cycle	6/246	112/18670	0.00368596	0.0303863	0.0218434	FGF7/FGFR2/PDGFA/SHH/WNT5A/TMEM79	6
BP	GO:0042633	hair cycle	6/246	112/18670	0.00368596	0.0303863	0.0218434	FGF7/FGFR2/PDGFA/SHH/WNT5A/TMEM79	6
BP	GO:0034505	tooth mineralization	3/246	24/18670	0.00372752	0.0305222	0.0219411	COL1A1/FAM20A/FAM20C	3
BP	GO:0062009	secondary palate development	3/246	24/18670	0.00372752	0.0305222	0.0219411	WNT5A/WNT7A/WNT3A	3
BP	GO:1901071	glucosamine-containing compound metabolic process	3/246	24/18670	0.00372752	0.0305222	0.0219411	CHST6/MGAT3/CHST2	3
BP	GO:0000302	response to reactive oxygen species	9/246	232/18670	0.00374546	0.0305304	0.021947	APOE/PLK3/COL1A1/CRYAB/NOS3/PDGFRA/SDC1/SOD3/LRRK2	9
BP	GO:0042445	hormone metabolic process	9/246	232/18670	0.00374546	0.0305304	0.021947	LHB/PCSK6/PCSK1/PDGFRA/SHH/SPP1/PCSK1N/GCNT4/CHST9	9
BP	GO:0018209	peptidyl-serine modification	11/246	322/18670	0.0037536	0.0305304	0.021947	BDKRB2/BGN/CD44/DCN/PDGFB/TGFB1/WNT5A/TENM1/WNT3A/GALNT13/LRRK2	11
BP	GO:0048640	negative regulation of developmental growth	6/246	113/18670	0.00385072	0.0312508	0.0224648	FGFR3/SPP1/WNT3/WNT5A/GDF15/WNT3A	6
BP	GO:0001570	vasculogenesis	5/246	79/18670	0.0038929	0.031499	0.0226432	EMP2/SHH/TGFB1/WNT7A/WNT7B	5
BP	GO:0045666	positive regulation of neuron differentiation	12/246	371/18670	0.00390096	0.031499	0.0226432	APOE/EPHA4/SYT1/SYT4/WNT3/WNT5A/ARHGEF2/STMN2/NLGN1/ATP8A2/WNT3A/GPC2	12
BP	GO:0001913	T cell mediated cytotoxicity	4/246	49/18670	0.00391581	0.031499	0.0226432	CTSC/EMP2/HLA-G/RAB27A	4
BP	GO:0048546	digestive tract morphogenesis	4/246	49/18670	0.00391581	0.031499	0.0226432	FGFR2/PDGFRA/SHH/WNT5A	4
BP	GO:0000187	activation of MAPK activity	7/246	152/18670	0.00406857	0.0326559	0.0234749	CSPG4/WNT5A/WNT7B/GDF15/BIRC7/LRRK2/MUC20	7
BP	GO:0002088	lens development in camera-type eye	5/246	80/18670	0.00410872	0.0328338	0.0236028	CRYAB/TGFB1/WNT5A/WNT7A/WNT7B	5
BP	GO:0097061	dendritic spine organization	5/246	80/18670	0.00410872	0.0328338	0.0236028	APOE/EPHA4/WNT7A/NLGN1/LRRK2	5
BP	GO:0003071	renal system process involved in regulation of systemic arterial blood pressure	3/246	25/18670	0.00419501	0.032888	0.0236418	EMP2/F2R/PDGFB	3
BP	GO:0045956	positive regulation of calcium ion-dependent exocytosis	3/246	25/18670	0.00419501	0.032888	0.0236418	SYT1/SYT4/NLGN1	3
BP	GO:0060571	morphogenesis of an epithelial fold	3/246	25/18670	0.00419501	0.032888	0.0236418	FGFR2/SHH/WNT5A	3
BP	GO:0072012	glomerulus vasculature development	3/246	25/18670	0.00419501	0.032888	0.0236418	NOTCH3/PDGFB/PDGFRA	3
BP	GO:0097186	amelogenesis	3/246	25/18670	0.00419501	0.032888	0.0236418	FAM20A/FAM20C/PERP	3
BP	GO:1904861	excitatory synapse assembly	3/246	25/18670	0.00419501	0.032888	0.0236418	WNT5A/WNT7A/NLGN1	3
BP	GO:2000482	regulation of interleukin-8 secretion	3/246	25/18670	0.00419501	0.032888	0.0236418	F2R/TLR2/WNT5A	3
BP	GO:0032963	collagen metabolic process	6/246	115/18670	0.00419655	0.032888	0.0236418	COL1A1/F2R/MMP11/MMP14/MMP16/TGFB1	6
BP	GO:0046660	female sex differentiation	6/246	115/18670	0.00419655	0.032888	0.0236418	LRP2/MMP14/NOS3/PDGFRA/VGF/WNT5A	6
BP	GO:0010770	positive regulation of cell morphogenesis involved in differentiation	7/246	154/18670	0.00436949	0.03417	0.0245633	EPHA4/FLNA/MPL/MYOC/WNT3/CSPG5/WNT3A	7
BP	GO:0045599	negative regulation of fat cell differentiation	4/246	51/18670	0.00452504	0.0352355	0.0253293	MMP11/TGFB1/WNT5A/WNT3A	4
BP	GO:0048260	positive regulation of receptor-mediated endocytosis	4/246	51/18670	0.00452504	0.0352355	0.0253293	CLU/HIP1/WNT3A/PCSK9	4
BP	GO:0008202	steroid metabolic process	11/246	331/18670	0.0046098	0.0358192	0.0257488	APOE/LHB/LRP2/PDGFRA/SHH/SPP1/SREBF1/FGF23/ABCB11/WWOX/PCSK9	11
BP	GO:0048843	negative regulation of axon extension involved in axon guidance	3/246	26/18670	0.00469653	0.0363384	0.0261221	WNT3/WNT5A/WNT3A	3
BP	GO:0060740	prostate gland epithelium morphogenesis	3/246	26/18670	0.00469653	0.0363384	0.0261221	FGFR2/SHH/WNT5A	3
BP	GO:0048145	regulation of fibroblast proliferation	5/246	83/18670	0.00480736	0.0370555	0.0266376	PDGFA/PDGFB/PDGFRA/TGFB1/WNT5A	5
BP	GO:0030900	forebrain development	12/246	381/18670	0.00481008	0.0370555	0.0266376	FGFR2/FLNA/LRP2/NPY/NOTCH3/SHH/WNT5A/WNT7A/WNT7B/BCAN/WNT3A/LRRK2	12
BP	GO:0032147	activation of protein kinase activity	11/246	333/18670	0.00481965	0.0370555	0.0266376	CSPG4/EMP2/F2R/PDGFB/WNT5A/WNT7B/TNFRSF10A/GDF15/BIRC7/LRRK2/MUC20	11
BP	GO:0015872	dopamine transport	4/246	52/18670	0.00485228	0.03715	0.0267055	GDNF/RAB3B/SYT1/SYT4	4
BP	GO:2000179	positive regulation of neural precursor cell proliferation	4/246	52/18670	0.00485228	0.03715	0.0267055	FLNA/LRP2/SHH/WNT3A	4
BP	GO:0001952	regulation of cell-matrix adhesion	6/246	119/18670	0.00495637	0.0378675	0.0272213	EMP2/MMP14/MYOC/SDC4/POSTN/ACER2	6
BP	GO:0034341	response to interferon-gamma	8/246	199/18670	0.00497974	0.0379666	0.0272925	CD44/GBP1/GBP3/HLA-G/NCAM1/TLR2/WNT5A/TRIM22	8
BP	GO:0006706	steroid catabolic process	3/246	27/18670	0.00523276	0.0394836	0.028383	APOE/SPP1/FGF23	3
BP	GO:0043032	positive regulation of macrophage activation	3/246	27/18670	0.00523276	0.0394836	0.028383	CTSC/WNT5A/LRRK2	3
BP	GO:0048668	collateral sprouting	3/246	27/18670	0.00523276	0.0394836	0.028383	SPP1/WNT3/WNT3A	3
BP	GO:0061437	renal system vasculature development	3/246	27/18670	0.00523276	0.0394836	0.028383	NOTCH3/PDGFB/PDGFRA	3
BP	GO:0061440	kidney vasculature development	3/246	27/18670	0.00523276	0.0394836	0.028383	NOTCH3/PDGFB/PDGFRA	3
BP	GO:0010811	positive regulation of cell-substrate adhesion	6/246	121/18670	0.00537206	0.040451	0.0290785	EMP2/FLNA/MYOC/SDC4/CSPG5/COL26A1	6
BP	GO:0071496	cellular response to external stimulus	11/246	339/18670	0.00549503	0.0412918	0.0296829	COL1A1/KCNJ2/PHEX/SREBF1/TGFB1/FGF23/TNFRSF10A/XPR1/POSTN/LRRK2/PCSK9	11
BP	GO:0030199	collagen fibril organization	4/246	54/18670	0.00555365	0.0415613	0.0298766	ACAN/COL1A1/FMOD/MMP11	4
BP	GO:0051353	positive regulation of oxidoreductase activity	4/246	54/18670	0.00555365	0.0415613	0.0298766	APOE/GDNF/S100A1/FGF23	4
BP	GO:0032760	positive regulation of tumor necrosis factor production	5/246	86/18670	0.00558646	0.0417214	0.0299917	CLU/TLR2/WNT5A/ARHGEF2/LRRK2	5
BP	GO:1902905	positive regulation of supramolecular fiber organization	8/246	204/18670	0.00576523	0.0427123	0.030704	APOE/CLU/FLNA/MYOC/SDC4/TENM1/STMN2/CDK5RAP2	8
BP	GO:0021846	cell proliferation in forebrain	3/246	28/18670	0.00580434	0.0427123	0.030704	FGFR2/WNT7A/WNT3A	3
BP	GO:0032770	positive regulation of monooxygenase activity	3/246	28/18670	0.00580434	0.0427123	0.030704	APOE/GDNF/S100A1	3
BP	GO:0034377	plasma lipoprotein particle assembly	3/246	28/18670	0.00580434	0.0427123	0.030704	APOE/BMP1/MTTP	3
BP	GO:0060512	prostate gland morphogenesis	3/246	28/18670	0.00580434	0.0427123	0.030704	FGFR2/SHH/WNT5A	3
BP	GO:1902003	regulation of amyloid-beta formation	3/246	28/18670	0.00580434	0.0427123	0.030704	APOE/CLU/EPHA4	3
BP	GO:1902668	negative regulation of axon guidance	3/246	28/18670	0.00580434	0.0427123	0.030704	WNT3/WNT5A/WNT3A	3
BP	GO:0002062	chondrocyte differentiation	6/246	123/18670	0.00581272	0.0427123	0.030704	ACAN/FGFR3/TGFB1/TGFBI/WNT7A/CHST11	6
BP	GO:0045926	negative regulation of growth	9/246	249/18670	0.00591153	0.0432726	0.0311068	CRYAB/FGFR3/GPC3/SPP1/TGFB1/WNT3/WNT5A/GDF15/WNT3A	9
BP	GO:0002011	morphogenesis of an epithelial sheet	4/246	55/18670	0.00592841	0.0432726	0.0311068	CD44/FLNA/WNT5A/WNT7A	4
BP	GO:0043551	regulation of phosphatidylinositol 3-kinase activity	4/246	55/18670	0.00592841	0.0432726	0.0311068	FGFR3/PDGFB/PDGFRA/TGFB1	4
BP	GO:0099173	postsynapse organization	7/246	163/18670	0.00593636	0.0432726	0.0311068	APOE/EPHA4/GDNF/WNT5A/WNT7A/NLGN1/LRRK2	7
BP	GO:0014066	regulation of phosphatidylinositol 3-kinase signaling	6/246	124/18670	0.00604268	0.0438725	0.031538	DCN/F2R/MYOC/PDGFA/PDGFB/PDGFRA	6
BP	GO:0046717	acid secretion	6/246	124/18670	0.00604268	0.0438725	0.031538	BDKRB2/PLA2G5/SNAP25/SYT1/SYT4/ABCB11	6
BP	GO:0010951	negative regulation of endopeptidase activity	9/246	250/18670	0.00606389	0.0439391	0.0315859	AHSG/CD44/CRYAB/SERPINA1/PROS1/SLPI/PCSK1N/SH3RF1/BIRC7	9
BP	GO:0050679	positive regulation of epithelial cell proliferation	8/246	206/18670	0.00610457	0.0441463	0.0317349	FGF7/FGFR2/PDGFB/SHH/TGFB1/WNT5A/WNT7A/WNT3A	8
BP	GO:0106027	neuron projection organization	5/246	88/18670	0.00615288	0.0442329	0.0317971	APOE/EPHA4/WNT7A/NLGN1/LRRK2	5
BP	GO:1903557	positive regulation of tumor necrosis factor superfamily cytokine production	5/246	88/18670	0.00615288	0.0442329	0.0317971	CLU/TLR2/WNT5A/ARHGEF2/LRRK2	5
BP	GO:1903725	regulation of phospholipid metabolic process	5/246	88/18670	0.00615288	0.0442329	0.0317971	FGFR3/PDGFA/PDGFB/PDGFRA/TGFB1	5
BP	GO:0070482	response to oxygen levels	12/246	394/18670	0.0062372	0.044751	0.0321696	PLK3/COL1A1/CRYAB/F7/MMP14/MPL/PAM/SOD3/TGFB1/TLR2/POSTN/B3GAT1	12
BP	GO:0030326	embryonic limb morphogenesis	6/246	125/18670	0.0062792	0.0447929	0.0321996	GPC3/SHH/WNT3/WNT5A/WNT7A/CHST11	6
BP	GO:0035113	embryonic appendage morphogenesis	6/246	125/18670	0.0062792	0.0447929	0.0321996	GPC3/SHH/WNT3/WNT5A/WNT7A/CHST11	6
BP	GO:0002064	epithelial cell development	8/246	207/18670	0.00627983	0.0447929	0.0321996	FLNA/PDGFB/PROC/SDC1/WNT5A/WNT7A/WNT7B/TMEM79	8
BP	GO:0048488	synaptic vesicle endocytosis	4/246	56/18670	0.00631964	0.0449014	0.0322777	RAB27B/SYT1/NLGN1/LRRK2	4
BP	GO:0140238	presynaptic endocytosis	4/246	56/18670	0.00631964	0.0449014	0.0322777	RAB27B/SYT1/NLGN1/LRRK2	4
BP	GO:0000132	establishment of mitotic spindle orientation	3/246	29/18670	0.00641187	0.0451178	0.0324332	ARHGEF2/SPRY1/CDK5RAP2	3
BP	GO:0031063	regulation of histone deacetylation	3/246	29/18670	0.00641187	0.0451178	0.0324332	SREBF1/TGFB1/LRRK2	3
BP	GO:0060441	epithelial tube branching involved in lung morphogenesis	3/246	29/18670	0.00641187	0.0451178	0.0324332	FGFR2/SHH/SPRY1	3
BP	GO:0070528	protein kinase C signaling	3/246	29/18670	0.00641187	0.0451178	0.0324332	PDGFB/WNT5A/FIBIN	3
BP	GO:0072606	interleukin-8 secretion	3/246	29/18670	0.00641187	0.0451178	0.0324332	F2R/TLR2/WNT5A	3
BP	GO:0060021	roof of mouth development	5/246	89/18670	0.00645071	0.0452742	0.0325457	PDGFRA/SHH/WNT5A/WNT7A/WNT3A	5
BP	GO:0050670	regulation of lymphocyte proliferation	8/246	208/18670	0.00645889	0.0452742	0.0325457	CD55/HLA-G/MPL/SDC4/SHH/TGFB1/SH3RF1/WNT3A	8
BP	GO:0090101	negative regulation of transmembrane receptor protein serine/threonine kinase signaling pathway	6/246	126/18670	0.00652239	0.0456317	0.0328027	LRP2/TGFB1/WNT5A/CHST11/SOST/PMEPA1	6
BP	GO:0032944	regulation of mononuclear cell proliferation	8/246	209/18670	0.00664179	0.0463783	0.0333393	CD55/HLA-G/MPL/SDC4/SHH/TGFB1/SH3RF1/WNT3A	8
BP	GO:0042475	odontogenesis of dentin-containing tooth	5/246	90/18670	0.00675851	0.0471032	0.0338604	PDGFRA/SHH/FAM20A/FAM20C/PERP	5
BP	GO:0032368	regulation of lipid transport	6/246	127/18670	0.00677235	0.0471062	0.0338626	APOE/SHH/SPP1/ABCA12/ATP8A2/PCSK9	6
BP	GO:0007178	transmembrane receptor protein serine/threonine kinase signaling pathway	11/246	349/18670	0.00678474	0.0471062	0.0338626	FMOD/GPC3/LRP2/PCSK6/SHH/TGFB1/WNT5A/GDF15/CHST11/SOST/PMEPA1	11
BP	GO:0030178	negative regulation of Wnt signaling pathway	8/246	210/18670	0.0068286	0.0473208	0.0340168	APOE/GPC3/IGFBP1/IGFBP6/SHH/WNT5A/SOST/WWOX	8
BP	GO:1990138	neuron projection extension	7/246	168/18670	0.00697046	0.0475807	0.0342037	APOE/SYT1/SYT4/WNT3/WNT5A/POSTN/WNT3A	7
BP	GO:1903531	negative regulation of secretion by cell	8/246	211/18670	0.00701935	0.0475807	0.0342037	ASIC1/APOE/F2R/GBP1/SREBF1/SYT4/FGF23/RHBDF1	8
BP	GO:0002687	positive regulation of leukocyte migration	6/246	128/18670	0.00702919	0.0475807	0.0342037	F7/MMP14/TGFB1/WNT5A/CXCL14/DAPK2	6
BP	GO:0051491	positive regulation of filopodium assembly	3/246	30/18670	0.00705589	0.0475807	0.0342037	TENM1/NLGN1/AGRN	3
BP	GO:0061082	myeloid leukocyte cytokine production	3/246	30/18670	0.00705589	0.0475807	0.0342037	HLA-G/TGFB1/WNT5A	3
BP	GO:0099068	postsynapse assembly	3/246	30/18670	0.00705589	0.0475807	0.0342037	WNT5A/WNT7A/NLGN1	3
BP	GO:1905606	regulation of presynapse assembly	3/246	30/18670	0.00705589	0.0475807	0.0342037	WNT7A/NLGN1/WNT3A	3
BP	GO:0030510	regulation of BMP signaling pathway	5/246	91/18670	0.00707645	0.0475807	0.0342037	GPC3/LRP2/PCSK6/WNT5A/SOST	5
BP	GO:0060333	interferon-gamma-mediated signaling pathway	5/246	91/18670	0.00707645	0.0475807	0.0342037	CD44/GBP1/HLA-G/NCAM1/TRIM22	5
BP	GO:0031663	lipopolysaccharide-mediated signaling pathway	4/246	58/18670	0.00715272	0.0475807	0.0342037	CD55/NOS3/TGFB1/TLR2	4
BP	GO:0060997	dendritic spine morphogenesis	4/246	58/18670	0.00715272	0.0475807	0.0342037	EPHA4/WNT7A/NLGN1/LRRK2	4
BP	GO:0061900	glial cell activation	4/246	58/18670	0.00715272	0.0475807	0.0342037	CTSC/CLU/TLR2/LRRK2	4
BP	GO:1902903	regulation of supramolecular fiber organization	11/246	352/18670	0.00721462	0.0475807	0.0342037	APOE/CLU/CRYAB/FLNA/MYOC/SDC4/ARHGEF2/TENM1/STMN2/CLIP3/CDK5RAP2	11
BP	GO:0008343	adult feeding behavior	2/246	10/18670	0.00725696	0.0475807	0.0342037	AGRP/NPY	2
BP	GO:0032463	negative regulation of protein homooligomerization	2/246	10/18670	0.00725696	0.0475807	0.0342037	CLU/CRYAB	2
BP	GO:0034378	chylomicron assembly	2/246	10/18670	0.00725696	0.0475807	0.0342037	APOE/MTTP	2
BP	GO:0048021	regulation of melanin biosynthetic process	2/246	10/18670	0.00725696	0.0475807	0.0342037	WNT5A/SLC24A5	2
BP	GO:0048340	paraxial mesoderm morphogenesis	2/246	10/18670	0.00725696	0.0475807	0.0342037	WNT5A/WNT3A	2
BP	GO:0048755	branching morphogenesis of a nerve	2/246	10/18670	0.00725696	0.0475807	0.0342037	FGFR2/LRRK2	2
BP	GO:0051901	positive regulation of mitochondrial depolarization	2/246	10/18670	0.00725696	0.0475807	0.0342037	DCN/MYOC	2
BP	GO:0060068	vagina development	2/246	10/18670	0.00725696	0.0475807	0.0342037	LRP2/WNT5A	2
BP	GO:0060513	prostatic bud formation	2/246	10/18670	0.00725696	0.0475807	0.0342037	SHH/WNT5A	2
BP	GO:0072203	cell proliferation involved in metanephros development	2/246	10/18670	0.00725696	0.0475807	0.0342037	GPC3/SHH	2
BP	GO:0097278	complement-dependent cytotoxicity	2/246	10/18670	0.00725696	0.0475807	0.0342037	CD55/RAB27A	2
BP	GO:0098917	retrograde trans-synaptic signaling	2/246	10/18670	0.00725696	0.0475807	0.0342037	SYT4/NLGN1	2
BP	GO:0106049	regulation of cellular response to osmotic stress	2/246	10/18670	0.00725696	0.0475807	0.0342037	BDKRB2/ARHGEF2	2
BP	GO:1904338	regulation of dopaminergic neuron differentiation	2/246	10/18670	0.00725696	0.0475807	0.0342037	SHH/WNT3A	2
BP	GO:1904350	regulation of protein catabolic process in the vacuole	2/246	10/18670	0.00725696	0.0475807	0.0342037	LRP2/MGAT3	2
BP	GO:2000049	positive regulation of cell-cell adhesion mediated by cadherin	2/246	10/18670	0.00725696	0.0475807	0.0342037	WNT5A/WNT3A	2
BP	GO:2000644	regulation of receptor catabolic process	2/246	10/18670	0.00725696	0.0475807	0.0342037	APOE/PCSK9	2
BP	GO:0001658	branching involved in ureteric bud morphogenesis	4/246	59/18670	0.00759514	0.0493523	0.0354772	GDNF/GPC3/SHH/TGFB1	4
BP	GO:0010518	positive regulation of phospholipase activity	4/246	59/18670	0.00759514	0.0493523	0.0354772	FGFR3/FGFR2/PDGFRA/PLA2G5	4
BP	GO:0042130	negative regulation of T cell proliferation	4/246	59/18670	0.00759514	0.0493523	0.0354772	HLA-G/SDC4/SHH/TGFB1	4
BP	GO:0070527	platelet aggregation	4/246	59/18670	0.00759514	0.0493523	0.0354772	FLNA/MPL/PDGFRA/WNT3A	4
BP	GO:0044319	wound healing, spreading of cells	3/246	31/18670	0.00773691	0.0493523	0.0354772	CD44/FLNA/WNT7A	3
BP	GO:0045880	positive regulation of smoothened signaling pathway	3/246	31/18670	0.00773691	0.0493523	0.0354772	GPC3/SHH/RAB34	3
BP	GO:0070306	lens fiber cell differentiation	3/246	31/18670	0.00773691	0.0493523	0.0354772	TGFB1/WNT7A/WNT7B	3
BP	GO:0090505	epiboly involved in wound healing	3/246	31/18670	0.00773691	0.0493523	0.0354772	CD44/FLNA/WNT7A	3
BP	GO:0099174	regulation of presynapse organization	3/246	31/18670	0.00773691	0.0493523	0.0354772	WNT7A/NLGN1/WNT3A	3
BP	GO:1902230	negative regulation of intrinsic apoptotic signaling pathway in response to DNA damage	3/246	31/18670	0.00773691	0.0493523	0.0354772	CD44/CLU/MUC1	3
BP	GO:1902253	regulation of intrinsic apoptotic signaling pathway by p53 class mediator	3/246	31/18670	0.00773691	0.0493523	0.0354772	BDKRB2/CD44/MUC1	3
BP	GO:1902895	positive regulation of pri-miRNA transcription by RNA polymerase II	3/246	31/18670	0.00773691	0.0493523	0.0354772	PDGFB/SREBF1/TGFB1	3
BP	GO:0003073	regulation of systemic arterial blood pressure	5/246	93/18670	0.0077434	0.0493523	0.0354772	EMP2/F2R/NOS3/PDGFB/POSTN	5
BP	GO:0032092	positive regulation of protein binding	5/246	93/18670	0.0077434	0.0493523	0.0354772	APOE/EPHA4/WNT5A/WNT3A/LRRK2	5
BP	GO:0048704	embryonic skeletal system morphogenesis	5/246	93/18670	0.0077434	0.0493523	0.0354772	FGFR2/MMP14/MMP16/PDGFRA/CHST11	5
BP	GO:0072080	nephron tubule development	5/246	93/18670	0.0077434	0.0493523	0.0354772	GDNF/GPC3/SHH/TGFB1/WNT7B	5
BP	GO:0006906	vesicle fusion	5/246	94/18670	0.00809274	0.0513995	0.0369488	SNAP25/SYT1/SYT4/STX11/RAB34	5
BP	GO:0042158	lipoprotein biosynthetic process	5/246	94/18670	0.00809274	0.0513995	0.0369488	APOE/CLIP3/ZDHHC11/GOLGA7B/ZDHHC11B	5
BP	GO:0072175	epithelial tube formation	6/246	132/18670	0.00812738	0.0515299	0.0370426	FGFR2/GDNF/LRP2/SDC4/TGFB1/WNT5A	6
BP	GO:0043393	regulation of protein binding	8/246	217/18670	0.00824971	0.0522148	0.037535	APOE/EPHA4/PDGFB/SLPI/WNT5A/WNT3A/LRRK2/PCSK9	8
BP	GO:0001666	response to hypoxia	11/246	359/18670	0.00830057	0.0524458	0.037701	PLK3/CRYAB/F7/MMP14/MPL/PAM/SOD3/TGFB1/TLR2/POSTN/B3GAT1	11
BP	GO:0042116	macrophage activation	5/246	95/18670	0.00845287	0.0526051	0.0378155	CTSC/CLU/TLR2/WNT5A/LRRK2	5
BP	GO:0061326	renal tubule development	5/246	95/18670	0.00845287	0.0526051	0.0378155	GDNF/GPC3/SHH/TGFB1/WNT7B	5
BP	GO:1903076	regulation of protein localization to plasma membrane	5/246	95/18670	0.00845287	0.0526051	0.0378155	GBP1/MMP14/TGFB1/CLIP3/WNT3A	5
BP	GO:0042311	vasodilation	3/246	32/18670	0.00845542	0.0526051	0.0378155	APOE/BDKRB2/NOS3	3
BP	GO:0048841	regulation of axon extension involved in axon guidance	3/246	32/18670	0.00845542	0.0526051	0.0378155	WNT3/WNT5A/WNT3A	3
BP	GO:0060325	face morphogenesis	3/246	32/18670	0.00845542	0.0526051	0.0378155	COL1A1/PDGFRA/TGFB1	3
BP	GO:0061311	cell surface receptor signaling pathway involved in heart development	3/246	32/18670	0.00845542	0.0526051	0.0378155	TGFB1/WNT5A/WNT3A	3
BP	GO:0065005	protein-lipid complex assembly	3/246	32/18670	0.00845542	0.0526051	0.0378155	APOE/BMP1/MTTP	3
BP	GO:0090504	epiboly	3/246	32/18670	0.00845542	0.0526051	0.0378155	CD44/FLNA/WNT7A	3
BP	GO:0007040	lysosome organization	4/246	61/18670	0.00853319	0.0527296	0.037905	RAB34/LRRK2/CLVS2/CLVS1	4
BP	GO:0032370	positive regulation of lipid transport	4/246	61/18670	0.00853319	0.0527296	0.037905	APOE/SPP1/ABCA12/ATP8A2	4
BP	GO:0042733	embryonic digit morphogenesis	4/246	61/18670	0.00853319	0.0527296	0.037905	SHH/WNT5A/WNT7A/CHST11	4
BP	GO:0080171	lytic vacuole organization	4/246	61/18670	0.00853319	0.0527296	0.037905	RAB34/LRRK2/CLVS2/CLVS1	4
BP	GO:0048565	digestive tract development	6/246	134/18670	0.00872044	0.0529028	0.0380295	FGFR2/NPY/PDGFRA/SHH/TGFB1/WNT5A	6
BP	GO:0015014	heparan sulfate proteoglycan biosynthetic process, polysaccharide chain biosynthetic process	2/246	11/18670	0.00879299	0.0529028	0.0380295	EXTL1/CSGALNACT1	2
BP	GO:0033629	negative regulation of cell adhesion mediated by integrin	2/246	11/18670	0.00879299	0.0529028	0.0380295	MUC1/ACER2	2
BP	GO:0046512	sphingosine biosynthetic process	2/246	11/18670	0.00879299	0.0529028	0.0380295	ASAH2/ACER2	2
BP	GO:0048672	positive regulation of collateral sprouting	2/246	11/18670	0.00879299	0.0529028	0.0380295	WNT3/WNT3A	2
BP	GO:0051583	dopamine uptake involved in synaptic transmission	2/246	11/18670	0.00879299	0.0529028	0.0380295	GDNF/RAB3B	2
BP	GO:0051934	catecholamine uptake involved in synaptic transmission	2/246	11/18670	0.00879299	0.0529028	0.0380295	GDNF/RAB3B	2
BP	GO:0060439	trachea morphogenesis	2/246	11/18670	0.00879299	0.0529028	0.0380295	SHH/WNT7B	2
BP	GO:0060736	prostate gland growth	2/246	11/18670	0.00879299	0.0529028	0.0380295	FGFR2/SHH	2
BP	GO:0060856	establishment of blood-brain barrier	2/246	11/18670	0.00879299	0.0529028	0.0380295	WNT7A/WNT7B	2
BP	GO:0072321	chaperone-mediated protein transport	2/246	11/18670	0.00879299	0.0529028	0.0380295	CLU/CLIP3	2
BP	GO:0098814	spontaneous synaptic transmission	2/246	11/18670	0.00879299	0.0529028	0.0380295	SYT1/RPH3A	2
BP	GO:1902805	positive regulation of synaptic vesicle transport	2/246	11/18670	0.00879299	0.0529028	0.0380295	SYT1/NLGN1	2
BP	GO:1903980	positive regulation of microglial cell activation	2/246	11/18670	0.00879299	0.0529028	0.0380295	CTSC/LRRK2	2
BP	GO:1905146	lysosomal protein catabolic process	2/246	11/18670	0.00879299	0.0529028	0.0380295	LRP2/MGAT3	2
BP	GO:1905383	protein localization to presynapse	2/246	11/18670	0.00879299	0.0529028	0.0380295	RAB27B/WNT7A	2
BP	GO:0050921	positive regulation of chemotaxis	6/246	135/18670	0.00902832	0.0542293	0.0389831	F7/PDGFB/TGFB1/WNT5A/CXCL14/DAPK2	6
BP	GO:0010038	response to metal ion	11/246	364/18670	0.00915105	0.0543483	0.0390686	PAM/SDC1/SHH/SOD3/SYT1/SYT4/WNT5A/FGF23/NLGN1/LRRK2/FIBIN	11
BP	GO:0007416	synapse assembly	7/246	177/18670	0.00916068	0.0543483	0.0390686	TLR2/WNT5A/WNT7A/NLGN1/CLSTN2/WNT3A/AGRN	7
BP	GO:0048469	cell maturation	7/246	177/18670	0.00916068	0.0543483	0.0390686	DEFB1/MYOC/B4GALT6/FAM20C/TMEM79/LRRK2/AGRN	7
BP	GO:0051591	response to cAMP	5/246	97/18670	0.00920615	0.0543483	0.0390686	COL1A1/PLA2G5/SDC1/SREBF1/VGF	5
BP	GO:0060996	dendritic spine development	5/246	97/18670	0.00920615	0.0543483	0.0390686	APOE/EPHA4/WNT7A/NLGN1/LRRK2	5
BP	GO:0035115	embryonic forelimb morphogenesis	3/246	33/18670	0.00921183	0.0543483	0.0390686	SHH/WNT3/WNT7A	3
BP	GO:0040001	establishment of mitotic spindle localization	3/246	33/18670	0.00921183	0.0543483	0.0390686	ARHGEF2/SPRY1/CDK5RAP2	3
BP	GO:0042755	eating behavior	3/246	33/18670	0.00921183	0.0543483	0.0390686	AGRP/GDF15/ATP8A2	3
BP	GO:0060603	mammary gland duct morphogenesis	3/246	33/18670	0.00921183	0.0543483	0.0390686	FGFR2/TGFB1/WNT5A	3
BP	GO:1901797	negative regulation of signal transduction by p53 class mediator	3/246	33/18670	0.00921183	0.0543483	0.0390686	BDKRB2/CD44/MUC1	3
BP	GO:1902692	regulation of neuroblast proliferation	3/246	33/18670	0.00921183	0.0543483	0.0390686	SHH/TGFB1/LRRK2	3
BP	GO:0070663	regulation of leukocyte proliferation	8/246	222/18670	0.00939312	0.0552647	0.0397274	CD55/HLA-G/MPL/SDC4/SHH/TGFB1/SH3RF1/WNT3A	8
BP	GO:0001558	regulation of cell growth	12/246	416/18670	0.00939742	0.0552647	0.0397274	APOE/CRYAB/IGFBP1/MMP14/SPP1/SYT1/SYT4/TGFB1/WNT3/WNT5A/CHPT1/WNT3A	12
BP	GO:0010950	positive regulation of endopeptidase activity	7/246	178/18670	0.00943192	0.0552895	0.0397452	EPHA4/F2R/HIP1/TNFRSF10A/PERP/WNT3A/ACER2	7
BP	GO:0090090	negative regulation of canonical Wnt signaling pathway	7/246	178/18670	0.00943192	0.0552895	0.0397452	APOE/GPC3/IGFBP1/IGFBP6/SHH/WNT5A/SOST	7
BP	GO:0032371	regulation of sterol transport	4/246	63/18670	0.00954398	0.0557674	0.0400887	APOE/SHH/ABCA12/PCSK9	4
BP	GO:0032374	regulation of cholesterol transport	4/246	63/18670	0.00954398	0.0557674	0.0400887	APOE/SHH/ABCA12/PCSK9	4
BP	GO:0060191	regulation of lipase activity	5/246	98/18670	0.00959962	0.0560029	0.040258	FGFR3/FGFR2/PCSK6/PDGFRA/PLA2G5	5
BP	GO:0045165	cell fate commitment	9/246	270/18670	0.00979536	0.0569629	0.0409481	FGFR2/NOTCH3/SHH/WNT3/WNT5A/WNT7A/WNT7B/ARHGEF2/WNT3A	9
BP	GO:0045927	positive regulation of growth	9/246	270/18670	0.00979536	0.0569629	0.0409481	FGFR2/IGFBP1/MMP14/SYT1/SYT4/WNT3/ATP8A2/WNT3A/AGRN	9
BP	GO:0097191	extrinsic apoptotic signaling pathway	8/246	224/18670	0.00988212	0.057376	0.0412451	FGFR3/GDNF/NOS3/TGFB1/TNFRSF10A/ARHGEF2/WWOX/SH3RF1	8
BP	GO:0043588	skin development	12/246	419/18670	0.00991068	0.0574505	0.0412987	COL1A1/FGF7/FGFR2/PCSK6/PDGFA/SHH/SPRR3/WNT5A/ABCA12/ATP8A2/PERP/TMEM79	12
BP	GO:0034205	amyloid-beta formation	3/246	34/18670	0.0100065	0.0578226	0.0415661	APOE/CLU/EPHA4	3
BP	GO:0048566	embryonic digestive tract development	3/246	34/18670	0.0100065	0.0578226	0.0415661	FGFR2/PDGFRA/SHH	3
BP	GO:0032768	regulation of monooxygenase activity	4/246	64/18670	0.0100773	0.0580478	0.041728	APOE/GDNF/NOS3/S100A1	4
BP	GO:0043550	regulation of lipid kinase activity	4/246	64/18670	0.0100773	0.0580478	0.041728	FGFR3/PDGFB/PDGFRA/TGFB1	4
BP	GO:0036293	response to decreased oxygen levels	11/246	370/18670	0.010259	0.0581459	0.0417986	PLK3/CRYAB/F7/MMP14/MPL/PAM/SOD3/TGFB1/TLR2/POSTN/B3GAT1	11
BP	GO:0048015	phosphatidylinositol-mediated signaling	7/246	181/18670	0.0102809	0.0581459	0.0417986	DCN/F2R/MUC5AC/MYOC/PDGFA/PDGFB/PDGFRA	7
BP	GO:0033135	regulation of peptidyl-serine phosphorylation	6/246	139/18670	0.0103379	0.0581459	0.0417986	BDKRB2/CD44/TGFB1/WNT5A/TENM1/WNT3A	6
BP	GO:0030301	cholesterol transport	5/246	100/18670	0.010421	0.0581459	0.0417986	APOE/CLU/SHH/ABCA12/PCSK9	5
BP	GO:0034446	substrate adhesion-dependent cell spreading	5/246	100/18670	0.010421	0.0581459	0.0417986	FLNA/GBP1/MYOC/POSTN/CSPG5	5
BP	GO:0090174	organelle membrane fusion	5/246	100/18670	0.010421	0.0581459	0.0417986	SNAP25/SYT1/SYT4/STX11/RAB34	5
BP	GO:2001023	regulation of response to drug	5/246	100/18670	0.010421	0.0581459	0.0417986	GDNF/RAB3B/SYT1/SYT4/LRRK2	5
BP	GO:0030002	cellular anion homeostasis	2/246	12/18670	0.0104605	0.0581459	0.0417986	FGF23/XPR1	2
BP	GO:0030320	cellular monovalent inorganic anion homeostasis	2/246	12/18670	0.0104605	0.0581459	0.0417986	FGF23/XPR1	2
BP	GO:0033700	phospholipid efflux	2/246	12/18670	0.0104605	0.0581459	0.0417986	APOE/ABCA12	2
BP	GO:0045161	neuronal ion channel clustering	2/246	12/18670	0.0104605	0.0581459	0.0417986	MYOC/AGRN	2
BP	GO:0046520	sphingoid biosynthetic process	2/246	12/18670	0.0104605	0.0581459	0.0417986	ASAH2/ACER2	2
BP	GO:0046929	negative regulation of neurotransmitter secretion	2/246	12/18670	0.0104605	0.0581459	0.0417986	ASIC1/SYT4	2
BP	GO:0055062	phosphate ion homeostasis	2/246	12/18670	0.0104605	0.0581459	0.0417986	FGF23/XPR1	2
BP	GO:0060442	branching involved in prostate gland morphogenesis	2/246	12/18670	0.0104605	0.0581459	0.0417986	FGFR2/SHH	2
BP	GO:0071679	commissural neuron axon guidance	2/246	12/18670	0.0104605	0.0581459	0.0417986	GDNF/NCAM1	2
BP	GO:0072178	nephric duct morphogenesis	2/246	12/18670	0.0104605	0.0581459	0.0417986	EPHA4/GPC3	2
BP	GO:0072505	divalent inorganic anion homeostasis	2/246	12/18670	0.0104605	0.0581459	0.0417986	FGF23/XPR1	2
BP	GO:0072506	trivalent inorganic anion homeostasis	2/246	12/18670	0.0104605	0.0581459	0.0417986	FGF23/XPR1	2
BP	GO:0072578	neurotransmitter-gated ion channel clustering	2/246	12/18670	0.0104605	0.0581459	0.0417986	APOE/NLGN1	2
BP	GO:0097090	presynaptic membrane organization	2/246	12/18670	0.0104605	0.0581459	0.0417986	APOE/NLGN1	2
BP	GO:1900376	regulation of secondary metabolite biosynthetic process	2/246	12/18670	0.0104605	0.0581459	0.0417986	WNT5A/SLC24A5	2
BP	GO:1904181	positive regulation of membrane depolarization	2/246	12/18670	0.0104605	0.0581459	0.0417986	DCN/MYOC	2
BP	GO:0009896	positive regulation of catabolic process	12/246	423/18670	0.0106286	0.0589062	0.0423451	APOE/CTSC/CLU/PLK3/DCN/GPC3/LRP2/WNT5A/RNF144A/TRIM22/LRRK2/PCSK9	12
BP	GO:0060675	ureteric bud morphogenesis	4/246	65/18670	0.0106296	0.0589062	0.0423451	GDNF/GPC3/SHH/TGFB1	4
BP	GO:0046330	positive regulation of JNK cascade	6/246	140/18670	0.0106852	0.059125	0.0425024	EPHA4/WNT5A/WNT7A/WNT7B/SH3RF1/BIRC7	6
BP	GO:0032103	positive regulation of response to external stimulus	10/246	323/18670	0.0108359	0.0593514	0.0426651	CTSC/F7/NPY/PDGFB/TGFB1/TLR2/WNT5A/CXCL14/DAPK2/LRRK2	10
BP	GO:0032801	receptor catabolic process	3/246	35/18670	0.0108399	0.0593514	0.0426651	APOE/TGFB1/PCSK9	3
BP	GO:0033363	secretory granule organization	3/246	35/18670	0.0108399	0.0593514	0.0426651	F2R/SYT4/BAIAP3	3
BP	GO:0051294	establishment of spindle orientation	3/246	35/18670	0.0108399	0.0593514	0.0426651	ARHGEF2/SPRY1/CDK5RAP2	3
BP	GO:0051954	positive regulation of amine transport	3/246	35/18670	0.0108399	0.0593514	0.0426651	GDNF/RAB3B/SYT4	3
BP	GO:0098801	regulation of renal system process	3/246	35/18670	0.0108399	0.0593514	0.0426651	EMP2/F2R/PDGFB	3
BP	GO:1902991	regulation of amyloid precursor protein catabolic process	3/246	35/18670	0.0108399	0.0593514	0.0426651	APOE/CLU/EPHA4	3
BP	GO:0050770	regulation of axonogenesis	7/246	183/18670	0.010877	0.0593763	0.042683	APOE/EPHA4/SPP1/WNT3/WNT5A/WNT7A/WNT3A	7
BP	GO:0061136	regulation of proteasomal protein catabolic process	7/246	183/18670	0.010877	0.0593763	0.042683	APOE/CLU/PLK3/SHH/RNF144A/RHBDF1/LRRK2	7
BP	GO:0050709	negative regulation of protein secretion	6/246	141/18670	0.0110408	0.0601725	0.0432554	APOE/F2R/GBP1/SREBF1/SYT4/RHBDF1	6
BP	GO:1903829	positive regulation of cellular protein localization	10/246	324/18670	0.0110558	0.0601725	0.0432554	CD247/PLK3/FLNA/MGAT3/SHH/TGFB1/TENM1/CLIP3/ABCA12/WNT3A	10
BP	GO:0048017	inositol lipid-mediated signaling	7/246	184/18670	0.0111843	0.0606017	0.0435639	DCN/F2R/MUC5AC/MYOC/PDGFA/PDGFB/PDGFRA	7
BP	GO:0048639	positive regulation of developmental growth	7/246	184/18670	0.0111843	0.0606017	0.0435639	FGFR2/SYT1/SYT4/WNT3/ATP8A2/WNT3A/AGRN	7
BP	GO:0010594	regulation of endothelial cell migration	8/246	229/18670	0.0111873	0.0606017	0.0435639	APOE/DCN/EMP2/NOS3/PDGFB/TGFB1/WNT5A/WNT7A	8
BP	GO:0072171	mesonephric tubule morphogenesis	4/246	66/18670	0.011201	0.0606017	0.0435639	GDNF/GPC3/SHH/TGFB1	4
BP	GO:0002367	cytokine production involved in immune response	5/246	102/18670	0.0112892	0.0609882	0.0438418	CD55/HLA-G/TGFB1/TLR2/WNT5A	5
BP	GO:0060485	mesenchyme development	9/246	278/18670	0.0116956	0.0629944	0.0452839	COL1A1/FGFR2/GDNF/NOS3/SHH/TGFB1/WNT5A/SPRY1/WNT3A	9
BP	GO:0000578	embryonic axis specification	3/246	36/18670	0.0117123	0.0629944	0.0452839	PCSK6/WNT5A/WNT7A	3
BP	GO:0040036	regulation of fibroblast growth factor receptor signaling pathway	3/246	36/18670	0.0117123	0.0629944	0.0452839	WNT5A/SPRY1/FAM20C	3
BP	GO:0032387	negative regulation of intracellular transport	4/246	67/18670	0.0117919	0.0633296	0.0455248	CRYAB/SYT4/LRRK2/PCSK9	4
BP	GO:1905475	regulation of protein localization to membrane	7/246	187/18670	0.0121439	0.0641239	0.0460958	GBP1/GPC3/MMP14/TGFB1/CLIP3/WNT3A/GPC2	7
BP	GO:2001237	negative regulation of extrinsic apoptotic signaling pathway	5/246	104/18670	0.0122055	0.0641239	0.0460958	GDNF/NOS3/TNFRSF10A/ARHGEF2/SH3RF1	5
BP	GO:0016049	cell growth	13/246	484/18670	0.0122317	0.0641239	0.0460958	APOE/CRYAB/IGFBP1/MMP14/SPP1/SYT1/SYT4/TGFB1/WNT3/WNT5A/POSTN/CHPT1/WNT3A	13
BP	GO:0003306	Wnt signaling pathway involved in heart development	2/246	13/18670	0.0122559	0.0641239	0.0460958	WNT5A/WNT3A	2
BP	GO:0006670	sphingosine metabolic process	2/246	13/18670	0.0122559	0.0641239	0.0460958	ASAH2/ACER2	2
BP	GO:0007183	SMAD protein complex assembly	2/246	13/18670	0.0122559	0.0641239	0.0460958	TGFB1/PMEPA1	2
BP	GO:0031115	negative regulation of microtubule polymerization	2/246	13/18670	0.0122559	0.0641239	0.0460958	STMN2/CLIP3	2
BP	GO:0032536	regulation of cell projection size	2/246	13/18670	0.0122559	0.0641239	0.0460958	WNT7A/WNT7B	2
BP	GO:0035627	ceramide transport	2/246	13/18670	0.0122559	0.0641239	0.0460958	MTTP/ABCA12	2
BP	GO:0035641	locomotory exploration behavior	2/246	13/18670	0.0122559	0.0641239	0.0460958	APOE/LRRK2	2
BP	GO:0047484	regulation of response to osmotic stress	2/246	13/18670	0.0122559	0.0641239	0.0460958	BDKRB2/ARHGEF2	2
BP	GO:0048681	negative regulation of axon regeneration	2/246	13/18670	0.0122559	0.0641239	0.0460958	EPHA4/SPP1	2
BP	GO:0090594	inflammatory response to wounding	2/246	13/18670	0.0122559	0.0641239	0.0460958	F2R/TGFB1	2
BP	GO:1900025	negative regulation of substrate adhesion-dependent cell spreading	2/246	13/18670	0.0122559	0.0641239	0.0460958	GBP1/POSTN	2
BP	GO:1900272	negative regulation of long-term synaptic potentiation	2/246	13/18670	0.0122559	0.0641239	0.0460958	APOE/EPHA4	2
BP	GO:1902430	negative regulation of amyloid-beta formation	2/246	13/18670	0.0122559	0.0641239	0.0460958	APOE/CLU	2
BP	GO:1903726	negative regulation of phospholipid metabolic process	2/246	13/18670	0.0122559	0.0641239	0.0460958	PDGFA/PDGFB	2
BP	GO:2000052	positive regulation of non-canonical Wnt signaling pathway	2/246	13/18670	0.0122559	0.0641239	0.0460958	GPC3/WNT5A	2
BP	GO:0051965	positive regulation of synapse assembly	4/246	68/18670	0.0124025	0.064798	0.0465804	WNT7A/NLGN1/CLSTN2/AGRN	4
BP	GO:0043312	neutrophil degranulation	13/246	485/18670	0.0124257	0.0648265	0.0466009	AHSG/CD44/CTSC/CD55/FCGR2A/SERPINA1/QSOX1/RAB27A/SLPI/SNAP25/TLR2/TMC6/ATP11A	13
BP	GO:0045089	positive regulation of innate immune response	11/246	381/18670	0.0125552	0.0651165	0.0468094	HLA-G/MUC1/MUC4/MUC5AC/S100A1/TLR2/WNT5A/MUC20/MUC19/MUC21/MUC5B	11
BP	GO:0048588	developmental cell growth	8/246	234/18670	0.0126158	0.0651165	0.0468094	APOE/SPP1/SYT1/SYT4/WNT3/WNT5A/POSTN/WNT3A	8
BP	GO:0030212	hyaluronan metabolic process	3/246	37/18670	0.0126239	0.0651165	0.0468094	CD44/PDGFB/TGFB1	3
BP	GO:0031111	negative regulation of microtubule polymerization or depolymerization	3/246	37/18670	0.0126239	0.0651165	0.0468094	ARHGEF2/STMN2/CLIP3	3
BP	GO:0042307	positive regulation of protein import into nucleus	3/246	37/18670	0.0126239	0.0651165	0.0468094	FLNA/SHH/TGFB1	3
BP	GO:0048846	axon extension involved in axon guidance	3/246	37/18670	0.0126239	0.0651165	0.0468094	WNT3/WNT5A/WNT3A	3
BP	GO:1900026	positive regulation of substrate adhesion-dependent cell spreading	3/246	37/18670	0.0126239	0.0651165	0.0468094	FLNA/MYOC/CSPG5	3
BP	GO:1902284	neuron projection extension involved in neuron projection guidance	3/246	37/18670	0.0126239	0.0651165	0.0468094	WNT3/WNT5A/WNT3A	3
BP	GO:0008593	regulation of Notch signaling pathway	5/246	105/18670	0.012682	0.0651401	0.0468264	ELF3/MMP14/NOS3/NOTCH3/POSTN	5
BP	GO:0015748	organophosphate ester transport	5/246	105/18670	0.012682	0.0651401	0.0468264	APOE/MTTP/ATP11A/ABCA12/ATP8A2	5
BP	GO:0033138	positive regulation of peptidyl-serine phosphorylation	5/246	105/18670	0.012682	0.0651401	0.0468264	CD44/TGFB1/WNT5A/TENM1/WNT3A	5
BP	GO:0050673	epithelial cell proliferation	12/246	434/18670	0.0128116	0.0657136	0.0472387	APOE/FGF7/FGFR2/GPC3/MMP14/PDGFB/SHH/TGFB1/WNT5A/WNT7A/EHF/WNT3A	12
BP	GO:0046777	protein autophosphorylation	8/246	235/18670	0.0129169	0.06612	0.0475308	EPHA4/FGFR3/FGFR2/PDGFA/PDGFB/PDGFRA/DAPK2/LRRK2	8
BP	GO:0045834	positive regulation of lipid metabolic process	6/246	146/18670	0.0129452	0.06612	0.0475308	APOE/FGFR3/PDGFB/PDGFRA/SREBF1/TGFB1	6
BP	GO:0055123	digestive system development	6/246	146/18670	0.0129452	0.06612	0.0475308	FGFR2/NPY/PDGFRA/SHH/TGFB1/WNT5A	6
BP	GO:0002283	neutrophil activation involved in immune response	13/246	488/18670	0.0130218	0.0662897	0.0476528	AHSG/CD44/CTSC/CD55/FCGR2A/SERPINA1/QSOX1/RAB27A/SLPI/SNAP25/TLR2/TMC6/ATP11A	13
BP	GO:0050771	negative regulation of axonogenesis	4/246	69/18670	0.0130329	0.0662897	0.0476528	SPP1/WNT3/WNT5A/WNT3A	4
BP	GO:0055008	cardiac muscle tissue morphogenesis	4/246	69/18670	0.0130329	0.0662897	0.0476528	FGFR2/LRP2/TGFB1/WNT5A	4
BP	GO:0002456	T cell mediated immunity	5/246	106/18670	0.0131709	0.0668989	0.0480907	CTSC/CD55/EMP2/HLA-G/RAB27A	5
BP	GO:0043434	response to peptide hormone	12/246	436/18670	0.013243	0.0671715	0.0482867	AGRP/AHSG/COL1A1/F7/IGFBP1/PHEX/SREBF1/TGFB1/TLR2/VGF/GDF15/PCSK9	12
BP	GO:0072593	reactive oxygen species metabolic process	9/246	284/18670	0.0132924	0.0673287	0.0483996	CLU/CRYAB/NOS3/PDGFB/RAB27A/SOD3/TGFB1/TLR2/LRRK2	9
BP	GO:0042692	muscle cell differentiation	11/246	385/18670	0.0134807	0.0681875	0.049017	CDH15/FGFR2/MMP14/PDGFB/PDGFRA/SDC1/SHH/TGFB1/GDF15/SYNE1/WNT3A	11
BP	GO:0031669	cellular response to nutrient levels	8/246	237/18670	0.0135347	0.0683663	0.0491455	COL1A1/PHEX/SREBF1/FGF23/XPR1/POSTN/LRRK2/PCSK9	8
BP	GO:0060416	response to growth hormone	3/246	38/18670	0.013575	0.0684752	0.0492238	F7/PHEX/GDF15	3
BP	GO:0010517	regulation of phospholipase activity	4/246	70/18670	0.0136834	0.0689264	0.0495482	FGFR3/FGFR2/PDGFRA/PLA2G5	4
BP	GO:0002792	negative regulation of peptide secretion	6/246	148/18670	0.0137677	0.0691604	0.0497164	APOE/F2R/GBP1/SREBF1/SYT4/RHBDF1	6
BP	GO:0014065	phosphatidylinositol 3-kinase signaling	6/246	148/18670	0.0137677	0.0691604	0.0497164	DCN/F2R/MYOC/PDGFA/PDGFB/PDGFRA	6
BP	GO:0051048	negative regulation of secretion	8/246	238/18670	0.0138516	0.0694865	0.0499508	ASIC1/APOE/F2R/GBP1/SREBF1/SYT4/FGF23/RHBDF1	8
BP	GO:0003128	heart field specification	2/246	14/18670	0.0141754	0.0701359	0.0504176	LRP2/WNT3A	2
BP	GO:0030213	hyaluronan biosynthetic process	2/246	14/18670	0.0141754	0.0701359	0.0504176	PDGFB/TGFB1	2
BP	GO:0032802	low-density lipoprotein particle receptor catabolic process	2/246	14/18670	0.0141754	0.0701359	0.0504176	APOE/PCSK9	2
BP	GO:0043455	regulation of secondary metabolic process	2/246	14/18670	0.0141754	0.0701359	0.0504176	WNT5A/SLC24A5	2
BP	GO:0045591	positive regulation of regulatory T cell differentiation	2/246	14/18670	0.0141754	0.0701359	0.0504176	HLA-G/TGFB1	2
BP	GO:0060009	Sertoli cell development	2/246	14/18670	0.0141754	0.0701359	0.0504176	FLNA/SDC1	2
BP	GO:0070307	lens fiber cell development	2/246	14/18670	0.0141754	0.0701359	0.0504176	WNT7A/WNT7B	2
BP	GO:2001044	regulation of integrin-mediated signaling pathway	2/246	14/18670	0.0141754	0.0701359	0.0504176	EMP2/FLNA	2
BP	GO:0015696	ammonium transport	5/246	108/18670	0.0141868	0.0701359	0.0504176	GDNF/RAB3B/SLC18A3/SYT1/SYT4	5
BP	GO:0051092	positive regulation of NF-kappaB transcription factor activity	6/246	149/18670	0.0141923	0.0701359	0.0504176	CLU/TGFB1/TLR2/WNT5A/ARHGEF2/TRIM22	6
BP	GO:2001056	positive regulation of cysteine-type endopeptidase activity	6/246	149/18670	0.0141923	0.0701359	0.0504176	F2R/HIP1/TNFRSF10A/PERP/WNT3A/ACER2	6
BP	GO:0007219	Notch signaling pathway	7/246	193/18670	0.0142393	0.070178	0.0504479	ELF3/MMP14/NOS3/NOTCH3/TGFB1/POSTN/PERP	7
BP	GO:0051224	negative regulation of protein transport	7/246	193/18670	0.0142393	0.070178	0.0504479	APOE/F2R/GBP1/SREBF1/SYT4/RHBDF1/LRRK2	7
BP	GO:0048562	embryonic organ morphogenesis	9/246	288/18670	0.0144435	0.0710886	0.0511025	FGFR2/MMP14/MMP16/PDGFRA/SHH/WNT5A/CHST11/ATP8A2/WNT3A	9
BP	GO:0007257	activation of JUN kinase activity	3/246	39/18670	0.0145659	0.071116	0.0511222	WNT5A/WNT7B/BIRC7	3
BP	GO:0010874	regulation of cholesterol efflux	3/246	39/18670	0.0145659	0.071116	0.0511222	APOE/SHH/ABCA12	3
BP	GO:1902042	negative regulation of extrinsic apoptotic signaling pathway via death domain receptors	3/246	39/18670	0.0145659	0.071116	0.0511222	NOS3/TNFRSF10A/ARHGEF2	3
BP	GO:1902116	negative regulation of organelle assembly	3/246	39/18670	0.0145659	0.071116	0.0511222	ARHGEF2/CDK5RAP2/LRRK2	3
BP	GO:1902229	regulation of intrinsic apoptotic signaling pathway in response to DNA damage	3/246	39/18670	0.0145659	0.071116	0.0511222	CD44/CLU/MUC1	3
BP	GO:1904591	positive regulation of protein import	3/246	39/18670	0.0145659	0.071116	0.0511222	FLNA/SHH/TGFB1	3
BP	GO:0072009	nephron epithelium development	5/246	109/18670	0.0147139	0.0717423	0.0515724	GDNF/GPC3/SHH/TGFB1/WNT7B	5
BP	GO:0060193	positive regulation of lipase activity	4/246	72/18670	0.0150454	0.073261	0.0526641	FGFR3/FGFR2/PDGFRA/PLA2G5	4
BP	GO:0042119	neutrophil activation	13/246	498/18670	0.0151697	0.073768	0.0530286	AHSG/CD44/CTSC/CD55/FCGR2A/SERPINA1/QSOX1/RAB27A/SLPI/SNAP25/TLR2/TMC6/ATP11A	13
BP	GO:0061387	regulation of extent of cell growth	5/246	110/18670	0.0152539	0.0740789	0.0532521	APOE/SPP1/WNT3/WNT5A/WNT3A	5
BP	GO:0010632	regulation of epithelial cell migration	9/246	291/18670	0.015354	0.0744661	0.0535304	APOE/DCN/EMP2/FGF7/NOS3/PDGFB/TGFB1/WNT5A/WNT7A	9
BP	GO:0002685	regulation of leukocyte migration	7/246	196/18670	0.0153787	0.0744842	0.0535434	F7/MMP14/TGFB1/WNT5A/CXCL14/DAPK2/MTUS1	7
BP	GO:0002446	neutrophil mediated immunity	13/246	499/18670	0.0153986	0.0744842	0.0535434	AHSG/CD44/CTSC/CD55/FCGR2A/SERPINA1/QSOX1/RAB27A/SLPI/SNAP25/TLR2/TMC6/ATP11A	13
BP	GO:0007389	pattern specification process	12/246	446/18670	0.015569	0.0748481	0.053805	FGFR2/GDNF/GPC3/LRP2/PCSK6/SHH/WNT3/WNT5A/WNT7A/WNT7B/SPRY1/WNT3A	12
BP	GO:0001941	postsynaptic membrane organization	3/246	40/18670	0.0155968	0.0748481	0.053805	APOE/GDNF/NLGN1	3
BP	GO:0014046	dopamine secretion	3/246	40/18670	0.0155968	0.0748481	0.053805	GDNF/SYT1/SYT4	3
BP	GO:0014059	regulation of dopamine secretion	3/246	40/18670	0.0155968	0.0748481	0.053805	GDNF/SYT1/SYT4	3
BP	GO:0071526	semaphorin-plexin signaling pathway	3/246	40/18670	0.0155968	0.0748481	0.053805	FLNA/GDNF/NCAM1	3
BP	GO:0072210	metanephric nephron development	3/246	40/18670	0.0155968	0.0748481	0.053805	GDNF/PDGFB/PDGFRA	3
BP	GO:0032945	negative regulation of mononuclear cell proliferation	4/246	73/18670	0.0157573	0.0751972	0.054056	HLA-G/SDC4/SHH/TGFB1	4
BP	GO:0045685	regulation of glial cell differentiation	4/246	73/18670	0.0157573	0.0751972	0.054056	EPHA4/SHH/TGFB1/TLR2	4
BP	GO:0050672	negative regulation of lymphocyte proliferation	4/246	73/18670	0.0157573	0.0751972	0.054056	HLA-G/SDC4/SHH/TGFB1	4
BP	GO:0010952	positive regulation of peptidase activity	7/246	197/18670	0.0157725	0.0751972	0.054056	EPHA4/F2R/HIP1/TNFRSF10A/PERP/WNT3A/ACER2	7
BP	GO:1904950	negative regulation of establishment of protein localization	7/246	197/18670	0.0157725	0.0751972	0.054056	APOE/F2R/GBP1/SREBF1/SYT4/RHBDF1/LRRK2	7
BP	GO:0007265	Ras protein signal transduction	12/246	448/18670	0.0160693	0.0761171	0.0547173	APOE/F2R/MYOC/RAB3B/RAB27A/RAB27B/ARHGEF2/CYTH3/SPRY1/RHOBTB3/RAB34/RAB15	12
BP	GO:0031099	regeneration	7/246	198/18670	0.0161734	0.0761171	0.0547173	EPHA4/F7/IGFBP1/SPP1/TGFB1/WNT7A/POSTN	7
BP	GO:0007039	protein catabolic process in the vacuole	2/246	15/18670	0.0162155	0.0761171	0.0547173	LRP2/MGAT3	2
BP	GO:0007351	tripartite regional subdivision	2/246	15/18670	0.0162155	0.0761171	0.0547173	PCSK6/WNT5A	2
BP	GO:0008595	anterior/posterior axis specification, embryo	2/246	15/18670	0.0162155	0.0761171	0.0547173	PCSK6/WNT5A	2
BP	GO:0034380	high-density lipoprotein particle assembly	2/246	15/18670	0.0162155	0.0761171	0.0547173	APOE/BMP1	2
BP	GO:0042074	cell migration involved in gastrulation	2/246	15/18670	0.0162155	0.0761171	0.0547173	GPC3/WNT5A	2
BP	GO:0042159	lipoprotein catabolic process	2/246	15/18670	0.0162155	0.0761171	0.0547173	APOE/LYPLA2	2
BP	GO:0051770	positive regulation of nitric-oxide synthase biosynthetic process	2/246	15/18670	0.0162155	0.0761171	0.0547173	TLR2/LRRK2	2
BP	GO:0070571	negative regulation of neuron projection regeneration	2/246	15/18670	0.0162155	0.0761171	0.0547173	EPHA4/SPP1	2
BP	GO:0090494	dopamine uptake	2/246	15/18670	0.0162155	0.0761171	0.0547173	GDNF/RAB3B	2
BP	GO:1903543	positive regulation of exosomal secretion	2/246	15/18670	0.0162155	0.0761171	0.0547173	SDC1/SDC4	2
BP	GO:0015918	sterol transport	5/246	112/18670	0.0163735	0.0766631	0.0551097	APOE/CLU/SHH/ABCA12/PCSK9	5
BP	GO:0014015	positive regulation of gliogenesis	4/246	74/18670	0.0164901	0.0766631	0.0551097	LRP2/SHH/TGFB1/TLR2	4
BP	GO:0031670	cellular response to nutrient	4/246	74/18670	0.0164901	0.0766631	0.0551097	COL1A1/PHEX/FGF23/POSTN	4
BP	GO:0043507	positive regulation of JUN kinase activity	4/246	74/18670	0.0164901	0.0766631	0.0551097	EPHA4/WNT5A/WNT7B/BIRC7	4
BP	GO:0051145	smooth muscle cell differentiation	4/246	74/18670	0.0164901	0.0766631	0.0551097	FGFR2/PDGFB/SHH/TGFB1	4
BP	GO:0060998	regulation of dendritic spine development	4/246	74/18670	0.0164901	0.0766631	0.0551097	APOE/EPHA4/NLGN1/LRRK2	4
BP	GO:0072078	nephron tubule morphogenesis	4/246	74/18670	0.0164901	0.0766631	0.0551097	GDNF/GPC3/SHH/TGFB1	4
BP	GO:0010955	negative regulation of protein processing	3/246	41/18670	0.0166677	0.0766631	0.0551097	CD55/BIRC7/LRRK2	3
BP	GO:0035136	forelimb morphogenesis	3/246	41/18670	0.0166677	0.0766631	0.0551097	SHH/WNT3/WNT7A	3
BP	GO:0040019	positive regulation of embryonic development	3/246	41/18670	0.0166677	0.0766631	0.0551097	GDNF/SHH/WNT3A	3
BP	GO:0044091	membrane biogenesis	3/246	41/18670	0.0166677	0.0766631	0.0551097	EMP2/NLGN1/CLIP3	3
BP	GO:0048286	lung alveolus development	3/246	41/18670	0.0166677	0.0766631	0.0551097	FGFR2/PDGFA/ABCA12	3
BP	GO:0061028	establishment of endothelial barrier	3/246	41/18670	0.0166677	0.0766631	0.0551097	PROC/WNT7A/WNT7B	3
BP	GO:0098815	modulation of excitatory postsynaptic potential	3/246	41/18670	0.0166677	0.0766631	0.0551097	WNT7A/NLGN1/LRRK2	3
BP	GO:1902893	regulation of pri-miRNA transcription by RNA polymerase II	3/246	41/18670	0.0166677	0.0766631	0.0551097	PDGFB/SREBF1/TGFB1	3
BP	GO:1903318	negative regulation of protein maturation	3/246	41/18670	0.0166677	0.0766631	0.0551097	CD55/BIRC7/LRRK2	3
BP	GO:2001236	regulation of extrinsic apoptotic signaling pathway	6/246	155/18670	0.0169334	0.0777871	0.0559177	GDNF/NOS3/TNFRSF10A/ARHGEF2/WWOX/SH3RF1	6
BP	GO:0045088	regulation of innate immune response	12/246	452/18670	0.0171062	0.0784821	0.0564174	APOE/HLA-G/MUC1/MUC4/MUC5AC/S100A1/TLR2/WNT5A/MUC20/MUC19/MUC21/MUC5B	12
BP	GO:0001707	mesoderm formation	4/246	75/18670	0.0172439	0.0788168	0.0566579	FGFR2/WNT3/WNT5A/WNT3A	4
BP	GO:0003281	ventricular septum development	4/246	75/18670	0.0172439	0.0788168	0.0566579	FGFR2/LRP2/NOS3/WNT5A	4
BP	GO:0150076	neuroinflammatory response	4/246	75/18670	0.0172439	0.0788168	0.0566579	CTSC/CLU/TLR2/LRRK2	4
BP	GO:0042129	regulation of T cell proliferation	6/246	156/18670	0.0174232	0.0795371	0.0571758	CD55/HLA-G/SDC4/SHH/TGFB1/SH3RF1	6
BP	GO:0002688	regulation of leukocyte chemotaxis	5/246	114/18670	0.0175465	0.0799998	0.0575084	F7/WNT5A/CXCL14/DAPK2/MTUS1	5
BP	GO:0002758	innate immune response-activating signal transduction	9/246	298/18670	0.0176422	0.0802357	0.0576779	MUC1/MUC4/MUC5AC/S100A1/TLR2/MUC20/MUC19/MUC21/MUC5B	9
BP	GO:0070661	leukocyte proliferation	9/246	298/18670	0.0176422	0.0802357	0.0576779	CLU/CD55/HLA-G/MPL/SDC4/SHH/TGFB1/SH3RF1/WNT3A	9
BP	GO:0030517	negative regulation of axon extension	3/246	42/18670	0.0177789	0.0807568	0.0580525	WNT3/WNT5A/WNT3A	3
BP	GO:0030509	BMP signaling pathway	6/246	157/18670	0.0179228	0.0809379	0.0581827	GPC3/LRP2/PCSK6/WNT5A/GDF15/SOST	6
BP	GO:1905952	regulation of lipid localization	6/246	157/18670	0.0179228	0.0809379	0.0581827	APOE/SHH/SPP1/ABCA12/ATP8A2/PCSK9	6
BP	GO:0046785	microtubule polymerization	4/246	76/18670	0.0180189	0.0809379	0.0581827	STMN2/TPPP/CLIP3/CDK5RAP2	4
BP	GO:0060411	cardiac septum morphogenesis	4/246	76/18670	0.0180189	0.0809379	0.0581827	FGFR2/LRP2/NOS3/WNT5A	4
BP	GO:0072088	nephron epithelium morphogenesis	4/246	76/18670	0.0180189	0.0809379	0.0581827	GDNF/GPC3/SHH/TGFB1	4
BP	GO:1904375	regulation of protein localization to cell periphery	5/246	115/18670	0.0181533	0.0809379	0.0581827	GBP1/MMP14/TGFB1/CLIP3/WNT3A	5
BP	GO:0010631	epithelial cell migration	10/246	351/18670	0.0183706	0.0809379	0.0581827	APOE/DCN/EMP2/FAT2/FGF7/NOS3/PDGFB/TGFB1/WNT5A/WNT7A	10
BP	GO:0010875	positive regulation of cholesterol efflux	2/246	16/18670	0.0183728	0.0809379	0.0581827	APOE/ABCA12	2
BP	GO:0016540	protein autoprocessing	2/246	16/18670	0.0183728	0.0809379	0.0581827	MYRF/PCSK9	2
BP	GO:0030214	hyaluronan catabolic process	2/246	16/18670	0.0183728	0.0809379	0.0581827	CD44/TGFB1	2
BP	GO:0032225	regulation of synaptic transmission, dopaminergic	2/246	16/18670	0.0183728	0.0809379	0.0581827	GDNF/RAB3B	2
BP	GO:0043217	myelin maintenance	2/246	16/18670	0.0183728	0.0809379	0.0581827	MYRF/CLU	2
BP	GO:0046519	sphingoid metabolic process	2/246	16/18670	0.0183728	0.0809379	0.0581827	ASAH2/ACER2	2
BP	GO:0048791	calcium ion-regulated exocytosis of neurotransmitter	2/246	16/18670	0.0183728	0.0809379	0.0581827	SYT1/SYT4	2
BP	GO:0061684	chaperone-mediated autophagy	2/246	16/18670	0.0183728	0.0809379	0.0581827	CLU/PLK3	2
BP	GO:0072176	nephric duct development	2/246	16/18670	0.0183728	0.0809379	0.0581827	EPHA4/GPC3	2
BP	GO:0072224	metanephric glomerulus development	2/246	16/18670	0.0183728	0.0809379	0.0581827	PDGFB/PDGFRA	2
BP	GO:0090493	catecholamine uptake	2/246	16/18670	0.0183728	0.0809379	0.0581827	GDNF/RAB3B	2
BP	GO:0097091	synaptic vesicle clustering	2/246	16/18670	0.0183728	0.0809379	0.0581827	SYN1/NLGN1	2
BP	GO:1900242	regulation of synaptic vesicle endocytosis	2/246	16/18670	0.0183728	0.0809379	0.0581827	NLGN1/LRRK2	2
BP	GO:1902004	positive regulation of amyloid-beta formation	2/246	16/18670	0.0183728	0.0809379	0.0581827	CLU/EPHA4	2
BP	GO:1902166	negative regulation of intrinsic apoptotic signaling pathway in response to DNA damage by p53 class mediator	2/246	16/18670	0.0183728	0.0809379	0.0581827	CD44/MUC1	2
BP	GO:1902992	negative regulation of amyloid precursor protein catabolic process	2/246	16/18670	0.0183728	0.0809379	0.0581827	APOE/CLU	2
BP	GO:1903541	regulation of exosomal secretion	2/246	16/18670	0.0183728	0.0809379	0.0581827	SDC1/SDC4	2
BP	GO:2001224	positive regulation of neuron migration	2/246	16/18670	0.0183728	0.0809379	0.0581827	FLNA/ARHGEF2	2
BP	GO:0048332	mesoderm morphogenesis	4/246	77/18670	0.0188152	0.0826872	0.0594402	FGFR2/WNT3/WNT5A/WNT3A	4
BP	GO:0051937	catecholamine transport	4/246	77/18670	0.0188152	0.0826872	0.0594402	GDNF/RAB3B/SYT1/SYT4	4
BP	GO:0006904	vesicle docking involved in exocytosis	3/246	43/18670	0.0189304	0.0827949	0.0595177	RAB3B/SNAP25/RAB15	3
BP	GO:0032459	regulation of protein oligomerization	3/246	43/18670	0.0189304	0.0827949	0.0595177	APOE/CLU/CRYAB	3
BP	GO:0045687	positive regulation of glial cell differentiation	3/246	43/18670	0.0189304	0.0827949	0.0595177	SHH/TGFB1/TLR2	3
BP	GO:0051293	establishment of spindle localization	3/246	43/18670	0.0189304	0.0827949	0.0595177	ARHGEF2/SPRY1/CDK5RAP2	3
BP	GO:0090132	epithelium migration	10/246	354/18670	0.019362	0.0845814	0.0608019	APOE/DCN/EMP2/FAT2/FGF7/NOS3/PDGFB/TGFB1/WNT5A/WNT7A	10
BP	GO:0051153	regulation of striated muscle cell differentiation	5/246	117/18670	0.0194082	0.0846818	0.060874	MMP14/SHH/TGFB1/GDF15/WNT3A	5
BP	GO:0021915	neural tube development	6/246	160/18670	0.0194801	0.0848942	0.0610267	LRP2/SDC4/SHH/TGFB1/WNT5A/WNT3A	6
BP	GO:0008589	regulation of smoothened signaling pathway	4/246	78/18670	0.019633	0.0851541	0.0612136	FGFR2/GPC3/SHH/RAB34	4
BP	GO:0061333	renal tubule morphogenesis	4/246	78/18670	0.019633	0.0851541	0.0612136	GDNF/GPC3/SHH/TGFB1	4
BP	GO:0070664	negative regulation of leukocyte proliferation	4/246	78/18670	0.019633	0.0851541	0.0612136	HLA-G/SDC4/SHH/TGFB1	4
BP	GO:0072028	nephron morphogenesis	4/246	78/18670	0.019633	0.0851541	0.0612136	GDNF/GPC3/SHH/TGFB1	4
BP	GO:0046394	carboxylic acid biosynthetic process	12/246	462/18670	0.019919	0.086252	0.0620028	BGN/VCAN/CSPG4/DCN/PDGFB/PLA2G5/TGFB1/ABCB11/CSPG5/ASAH2/BCAN/DSEL	12
BP	GO:0014047	glutamate secretion	3/246	44/18670	0.0201223	0.086252	0.0620028	SNAP25/SYT1/SYT4	3
BP	GO:0042987	amyloid precursor protein catabolic process	3/246	44/18670	0.0201223	0.086252	0.0620028	APOE/CLU/EPHA4	3
BP	GO:0044331	cell-cell adhesion mediated by cadherin	3/246	44/18670	0.0201223	0.086252	0.0620028	CDH15/WNT5A/WNT3A	3
BP	GO:0051489	regulation of filopodium assembly	3/246	44/18670	0.0201223	0.086252	0.0620028	TENM1/NLGN1/AGRN	3
BP	GO:0060412	ventricular septum morphogenesis	3/246	44/18670	0.0201223	0.086252	0.0620028	FGFR2/NOS3/WNT5A	3
BP	GO:0061001	regulation of dendritic spine morphogenesis	3/246	44/18670	0.0201223	0.086252	0.0620028	EPHA4/NLGN1/LRRK2	3
BP	GO:0090311	regulation of protein deacetylation	3/246	44/18670	0.0201223	0.086252	0.0620028	SREBF1/TGFB1/LRRK2	3
BP	GO:1902667	regulation of axon guidance	3/246	44/18670	0.0201223	0.086252	0.0620028	WNT3/WNT5A/WNT3A	3
BP	GO:1903573	negative regulation of response to endoplasmic reticulum stress	3/246	44/18670	0.0201223	0.086252	0.0620028	CLU/PPP1R15A/LRRK2	3
BP	GO:0016053	organic acid biosynthetic process	12/246	463/18670	0.0202182	0.0865613	0.0622252	BGN/VCAN/CSPG4/DCN/PDGFB/PLA2G5/TGFB1/ABCB11/CSPG5/ASAH2/BCAN/DSEL	12
BP	GO:0031110	regulation of microtubule polymerization or depolymerization	4/246	79/18670	0.0204725	0.0874451	0.0628604	ARHGEF2/STMN2/CLIP3/CDK5RAP2	4
BP	GO:0071260	cellular response to mechanical stimulus	4/246	79/18670	0.0204725	0.0874451	0.0628604	COL1A1/KCNJ2/TGFB1/TNFRSF10A	4
BP	GO:0031960	response to corticosteroid	6/246	162/18670	0.0205681	0.0876641	0.0630179	COL1A1/PAM/SDC1/TGFB1/WNT7B/FIBIN	6
BP	GO:0006825	copper ion transport	2/246	17/18670	0.0206438	0.0876641	0.0630179	STEAP4/STEAP2	2
BP	GO:0030540	female genitalia development	2/246	17/18670	0.0206438	0.0876641	0.0630179	LRP2/WNT5A	2
BP	GO:0032460	negative regulation of protein oligomerization	2/246	17/18670	0.0206438	0.0876641	0.0630179	CLU/CRYAB	2
BP	GO:0070166	enamel mineralization	2/246	17/18670	0.0206438	0.0876641	0.0630179	FAM20A/FAM20C	2
BP	GO:0001974	blood vessel remodeling	3/246	45/18670	0.0213547	0.0903678	0.0649614	BGN/NOS3/TGFB1	3
BP	GO:0032570	response to progesterone	3/246	45/18670	0.0213547	0.0903678	0.0649614	SREBF1/TGFB1/TLR2	3
BP	GO:0071827	plasma lipoprotein particle organization	3/246	45/18670	0.0213547	0.0903678	0.0649614	APOE/BMP1/MTTP	3
BP	GO:1903052	positive regulation of proteolysis involved in cellular protein catabolic process	5/246	120/18670	0.0213951	0.0904341	0.0650091	CTSC/CLU/PLK3/RNF144A/LRRK2	5
BP	GO:0043254	regulation of protein complex assembly	12/246	467/18670	0.0214486	0.0905064	0.0650611	APOE/CLU/CRYAB/TGFB1/ARHGEF2/TENM1/STMN2/TPPP/CLIP3/SOST/CDK5RAP2/PMEPA1	12
BP	GO:0090130	tissue migration	10/246	360/18670	0.0214618	0.0905064	0.0650611	APOE/DCN/EMP2/FAT2/FGF7/NOS3/PDGFB/TGFB1/WNT5A/WNT7A	10
BP	GO:0003007	heart morphogenesis	8/246	259/18670	0.0218263	0.0918356	0.0660166	FGFR2/LRP2/NOS3/SHH/TGFB1/WNT5A/SPRY1/WNT3A	8
BP	GO:0031331	positive regulation of cellular catabolic process	10/246	361/18670	0.0218273	0.0918356	0.0660166	APOE/CTSC/CLU/PLK3/DCN/LRP2/RNF144A/TRIM22/LRRK2/PCSK9	10
BP	GO:0001704	formation of primary germ layer	5/246	121/18670	0.0220858	0.0927095	0.0666448	FGFR2/MMP14/WNT3/WNT5A/WNT3A	5
BP	GO:0030968	endoplasmic reticulum unfolded protein response	5/246	121/18670	0.0220858	0.0927095	0.0666448	EXTL1/IGFBP1/KDELR3/PPP1R15A/RNF175	5
BP	GO:0032436	positive regulation of proteasomal ubiquitin-dependent protein catabolic process	4/246	81/18670	0.0222169	0.093046	0.0668867	CLU/PLK3/RNF144A/LRRK2	4
BP	GO:0034109	homotypic cell-cell adhesion	4/246	81/18670	0.0222169	0.093046	0.0668867	FLNA/MPL/PDGFRA/WNT3A	4
BP	GO:0001504	neurotransmitter uptake	3/246	46/18670	0.0226276	0.0945491	0.0679672	GDNF/RAB3B/SNAP25	3
BP	GO:0022602	ovulation cycle process	3/246	46/18670	0.0226276	0.0945491	0.0679672	NOS3/PAM/PDGFRA	3
BP	GO:0051091	positive regulation of DNA-binding transcription factor activity	8/246	261/18670	0.0227259	0.0948513	0.0681844	CLU/SHH/TGFB1/TLR2/WNT5A/ARHGEF2/TRIM22/WNT3A	8
BP	GO:0032434	regulation of proteasomal ubiquitin-dependent protein catabolic process	5/246	122/18670	0.0227908	0.0950135	0.0683011	CLU/PLK3/SHH/RNF144A/LRRK2	5
BP	GO:0048339	paraxial mesoderm development	2/246	18/18670	0.0230252	0.0952298	0.0684565	WNT5A/WNT3A	2
BP	GO:0090190	positive regulation of branching involved in ureteric bud morphogenesis	2/246	18/18670	0.0230252	0.0952298	0.0684565	GDNF/TGFB1	2
BP	GO:0150078	positive regulation of neuroinflammatory response	2/246	18/18670	0.0230252	0.0952298	0.0684565	CTSC/LRRK2	2
BP	GO:1900221	regulation of amyloid-beta clearance	2/246	18/18670	0.0230252	0.0952298	0.0684565	APOE/CLU	2
BP	GO:1902165	regulation of intrinsic apoptotic signaling pathway in response to DNA damage by p53 class mediator	2/246	18/18670	0.0230252	0.0952298	0.0684565	CD44/MUC1	2
BP	GO:1905276	regulation of epithelial tube formation	2/246	18/18670	0.0230252	0.0952298	0.0684565	GDNF/WNT5A	2
BP	GO:2000047	regulation of cell-cell adhesion mediated by cadherin	2/246	18/18670	0.0230252	0.0952298	0.0684565	WNT5A/WNT3A	2
BP	GO:0030279	negative regulation of ossification	4/246	82/18670	0.0231221	0.0953068	0.0685119	AHSG/TGFB1/FGF23/SOST	4
BP	GO:0060415	muscle tissue morphogenesis	4/246	82/18670	0.0231221	0.0953068	0.0685119	FGFR2/LRP2/TGFB1/WNT5A	4
BP	GO:1905954	positive regulation of lipid localization	4/246	82/18670	0.0231221	0.0953068	0.0685119	APOE/SPP1/ABCA12/ATP8A2	4
BP	GO:0051222	positive regulation of protein transport	11/246	418/18670	0.023209	0.095557	0.0686918	PLK3/F2R/FLNA/SHH/TGFB1/TLR2/WNT5A/BAIAP3/TENM1/POSTN/LRRK2	11
BP	GO:0030574	collagen catabolic process	3/246	47/18670	0.023941	0.0983492	0.0706989	MMP11/MMP14/MMP16	3
BP	GO:0061614	pri-miRNA transcription by RNA polymerase II	3/246	47/18670	0.023941	0.0983492	0.0706989	PDGFB/SREBF1/TGFB1	3
BP	GO:0071277	cellular response to calcium ion	4/246	83/18670	0.0240494	0.0986837	0.0709394	SYT1/SYT4/WNT5A/NLGN1	4
BP	GO:0032388	positive regulation of intracellular transport	7/246	215/18670	0.0241373	0.098933	0.0711186	PLK3/FLNA/SHH/SYT1/TGFB1/TENM1/NLGN1	7
BP	GO:0001838	embryonic epithelial tube formation	5/246	124/18670	0.0242441	0.0990374	0.0711937	GDNF/LRP2/SDC4/TGFB1/WNT5A	5
BP	GO:0014013	regulation of gliogenesis	5/246	124/18670	0.0242441	0.0990374	0.0711937	EPHA4/LRP2/SHH/TGFB1/TLR2	5
BP	GO:0048284	organelle fusion	5/246	124/18670	0.0242441	0.0990374	0.0711937	SNAP25/SYT1/SYT4/STX11/RAB34	5
CC	GO:0005796	Golgi lumen	45/259	102/19717	4.17277e-58	1.46464e-55	1.18155e-55	ACAN/AGRP/BGN/VCAN/CSPG4/DCN/DEFB1/F7/F10/FMOD/GPC3/LHB/MMP11/MMP14/MMP16/MUC1/MUC4/MUC5AC/OMD/OGN/PCSK6/PDGFA/PDGFB/PROC/PROS1/SDC1/SDC4/SOD3/TGFB1/WNT3/WNT5A/WNT7A/WNT7B/FGF23/PROZ/SDC3/CSPG5/BCAN/WNT3A/MUC20/GPC2/MUC19/AGRN/MUC21/MUC5B	45
CC	GO:0062023	collagen-containing extracellular matrix	35/259	406/19717	8.64246e-19	1.46723e-16	1.18364e-16	ACAN/AHSG/APLP1/APOE/BGN/CTSC/CLU/COL1A1/VCAN/CSPG4/DCN/F7/FGFR2/FMOD/GPC3/MYOC/NCAM1/OMD/OGN/PCSK6/PDGFB/SERPINA1/SHH/SLPI/SOD3/TGFB1/TGFBI/WNT5A/GDF15/SDC3/POSTN/SOST/COL26A1/GPC2/AGRN	35
CC	GO:0005788	endoplasmic reticulum lumen	31/259	309/19717	1.25404e-18	1.46723e-16	1.18364e-16	AHSG/APOE/CTSC/CLU/COL1A1/VCAN/F7/F10/GPC3/IGFBP1/MTTP/PDGFA/PDGFB/SERPINA1/PROC/QSOX1/SHH/SPP1/VGF/WNT3/WNT5A/WNT7A/WNT7B/FGF23/PROZ/MSLN/TMEM132A/FAM20C/WNT3A/COL26A1/PCSK9	31
CC	GO:0005795	Golgi stack	21/259	149/19717	5.90031e-16	5.17752e-14	4.1768e-14	PLK3/FUT1/FUT2/FUT3/RAB27B/B4GALT6/FUT9/MGAT4B/LYPLA2/GOLGA8A/CLIP3/CSGALNACT1/RAB34/GOLT1A/B4GALNT3/GOLGA8IP/GOLGA8T/GOLGA8K/GOLGA8M/GOLGA8O/GOLGA8R	21
CC	GO:0043202	lysosomal lumen	16/259	95/19717	1.08084e-13	7.58752e-12	6.12098e-12	ACAN/BGN/VCAN/CSPG4/DCN/FMOD/GPC3/OMD/OGN/SDC1/SDC4/SDC3/CSPG5/BCAN/GPC2/AGRN	16
CC	GO:0031985	Golgi cisterna	16/259	116/19717	2.66291e-12	1.5578e-10	1.25671e-10	FUT1/FUT2/FUT3/B4GALT6/FUT9/GOLGA8A/CSGALNACT1/RAB34/GOLT1A/B4GALNT3/GOLGA8IP/GOLGA8T/GOLGA8K/GOLGA8M/GOLGA8O/GOLGA8R	16
CC	GO:0005775	vacuolar lumen	18/259	172/19717	1.33545e-11	6.69635e-10	5.40206e-10	ACAN/BGN/CTSC/VCAN/CSPG4/DCN/FMOD/GPC3/OMD/OGN/SDC1/SDC4/SDC3/CSPG5/DAPK2/BCAN/GPC2/AGRN	18
CC	GO:0032580	Golgi cisterna membrane	14/259	92/19717	1.62229e-11	7.11779e-10	5.74205e-10	FUT1/FUT2/FUT3/B4GALT6/FUT9/GOLGA8A/CSGALNACT1/B4GALNT3/GOLGA8IP/GOLGA8T/GOLGA8K/GOLGA8M/GOLGA8O/GOLGA8R	14
CC	GO:0005802	trans-Golgi network	20/259	236/19717	4.63673e-11	1.80833e-09	1.45881e-09	CHST6/PAM/SNAP25/TGFBI/BAIAP3/CHST2/POSTN/RHOBTB3/ATP11A/CLIP3/PCSK1N/RBFOX1/PI4K2A/TMEM79/LRRK2/GOLT1A/CLVS2/CLVS1/CABP7/SLC24A5	20
CC	GO:0005801	cis-Golgi network	11/259	68/19717	1.28643e-09	4.51538e-08	3.64264e-08	HLA-G/KDELR3/GOLGA8A/RNF183/GOLGA8IP/GOLGA8T/GOLGA8K/GOLGA8M/GOLGA8O/TRAPPC3L/GOLGA8R	11
CC	GO:0000137	Golgi cis cisterna	8/259	28/19717	1.97052e-09	6.28773e-08	5.07243e-08	GOLGA8A/GOLT1A/GOLGA8IP/GOLGA8T/GOLGA8K/GOLGA8M/GOLGA8O/GOLGA8R	8
CC	GO:0030133	transport vesicle	23/259	392/19717	2.40117e-09	7.02341e-08	5.66591e-08	BGN/CD55/FGFR3/HLA-G/PAM/PCSK1/RAB3B/RAB27A/RAB27B/SLC18A3/SNAP25/SREBF1/SYN1/SYT1/SYT4/VGF/STX11/KDELR3/RPH3A/LRRK2/STEAP2/RAB15/SFTA2	23
CC	GO:0030135	coated vesicle	18/259	289/19717	5.67502e-08	1.53226e-06	1.2361e-06	APOE/CTSC/HIP1/HLA-G/LRP2/SERPINA1/RAB27A/RAB27B/SLC18A3/SREBF1/SYT1/WNT5A/MALL/KDELR3/CLVS2/CLVS1/PCSK9/STEAP2	18
CC	GO:0030666	endocytic vesicle membrane	12/259	167/19717	2.21555e-06	5.55471e-05	4.48108e-05	APOE/HIP1/HLA-G/NOS3/SLC18A3/TLR2/WNT3/WNT5A/WNT7A/WNT7B/RAB34/WNT3A	12
CC	GO:0031093	platelet alpha granule lumen	8/259	67/19717	2.65732e-06	6.21812e-05	5.01627e-05	AHSG/CLU/PDGFA/PDGFB/SERPINA1/PROS1/QSOX1/TGFB1	8
CC	GO:0098978	glutamatergic synapse	17/259	349/19717	4.02258e-06	8.82454e-05	7.11892e-05	ACAN/APOE/EPHA4/FLNA/HIP1/SNAP25/SYT1/SYT4/WNT5A/WNT7A/ARHGEF2/CSPG5/NLGN1/BCAN/CLSTN2/WNT3A/LRRK2	17
CC	GO:0030136	clathrin-coated vesicle	12/259	188/19717	7.53816e-06	0.000155641	0.000125558	APOE/HIP1/LRP2/RAB27A/RAB27B/SLC18A3/SYT1/WNT5A/MALL/CLVS2/CLVS1/STEAP2	12
CC	GO:0031228	intrinsic component of Golgi membrane	7/259	65/19717	2.26288e-05	0.000441262	0.000355974	QSOX1/SYT4/CHST2/CSGALNACT1/B4GALNT2/STEAP2/ACER2	7
CC	GO:0005798	Golgi-associated vesicle	11/259	178/19717	2.44794e-05	0.000452225	0.000364818	CTSC/HLA-G/SERPINA1/RAB27B/SLC18A3/SREBF1/CSPG5/KDELR3/LRRK2/PCSK9/STEAP2	11
CC	GO:0031091	platelet alpha granule	8/259	91/19717	2.6402e-05	0.000463355	0.000373797	AHSG/CLU/PDGFA/PDGFB/SERPINA1/PROS1/QSOX1/TGFB1	8
CC	GO:0032588	trans-Golgi network membrane	8/259	92/19717	2.85921e-05	0.000477897	0.000385528	BAIAP3/RHOBTB3/CLIP3/TMEM79/CLVS2/CLVS1/CABP7/SLC24A5	8
CC	GO:0031225	anchored component of membrane	10/259	170/19717	8.66662e-05	0.00138272	0.00111547	CD55/GFRA1/GPC3/NCAM1/RAB3B/RAB27B/SYN1/MSLN/BCAN/GPC2	10
CC	GO:0098793	presynapse	18/259	491/19717	9.33066e-05	0.00141137	0.00113857	EPHA4/HIP1/RAB3B/RAB27B/SLC18A3/SNAP25/SYN1/SYT1/SYT4/WNT7A/STX11/BAIAP3/NLGN1/RPH3A/PI4K2A/WNT3A/LRRK2/RAB15	18
CC	GO:0070382	exocytic vesicle	11/259	207/19717	9.65036e-05	0.00141137	0.00113857	RAB3B/RAB27A/RAB27B/SNAP25/SYN1/SYT1/SYT4/STX11/RPH3A/LRRK2/RAB15	11
CC	GO:0030658	transport vesicle membrane	11/259	208/19717	0.000100728	0.00141423	0.00114088	HLA-G/PAM/RAB3B/RAB27B/SLC18A3/SREBF1/SYN1/SYT1/SYT4/RPH3A/LRRK2	11
CC	GO:0005902	microvillus	7/259	83/19717	0.000110435	0.00149087	0.00120271	CD44/PDGFA/PDGFRA/TGFB1/WWOX/LRRK2/MUC20	7
CC	GO:0030173	integral component of Golgi membrane	6/259	60/19717	0.000134027	0.00174235	0.00140559	QSOX1/SYT4/CSGALNACT1/B4GALNT2/STEAP2/ACER2	6
CC	GO:0030139	endocytic vesicle	13/259	303/19717	0.000197777	0.00247928	0.00200008	APOE/HIP1/HLA-G/LRP2/NOS3/SLC18A3/TLR2/WNT3/WNT5A/WNT7A/WNT7B/RAB34/WNT3A	13
CC	GO:0008021	synaptic vesicle	10/259	191/19717	0.000225239	0.00272617	0.00219925	RAB3B/RAB27B/SNAP25/SYN1/SYT1/SYT4/STX11/RPH3A/LRRK2/RAB15	10
CC	GO:0005769	early endosome	14/259	350/19717	0.000233418	0.002731	0.00220314	APOE/EPHA4/F2R/HLA-G/ST8SIA2/ATP11A/CLIP3/PMEPA1/STEAP4/WNT3A/CLVS2/CLVS1/PCSK9/STEAP2	14
CC	GO:0045121	membrane raft	13/259	315/19717	0.000288138	0.00325825	0.00262849	CDH15/CD55/EMP2/F2R/NOS3/SDC4/SHH/TLR2/MALL/CLIP3/PI4K2A/ASAH2/LRRK2	13
CC	GO:0098857	membrane microdomain	13/259	316/19717	0.000297049	0.00325825	0.00262849	CDH15/CD55/EMP2/F2R/NOS3/SDC4/SHH/TLR2/MALL/CLIP3/PI4K2A/ASAH2/LRRK2	13
CC	GO:0031300	intrinsic component of organelle membrane	11/259	237/19717	0.000313815	0.00333786	0.00269271	QSOX1/RAB3B/RAB27B/SYN1/SYT1/SYT4/CHST2/CSGALNACT1/B4GALNT2/STEAP2/ACER2	11
CC	GO:0098563	intrinsic component of synaptic vesicle membrane	5/259	47/19717	0.000367838	0.00379739	0.00306342	RAB3B/RAB27B/SYN1/SYT1/SYT4	5
CC	GO:0098589	membrane region	13/259	328/19717	0.000423728	0.0041338	0.00333481	CDH15/CD55/EMP2/F2R/NOS3/SDC4/SHH/TLR2/MALL/CLIP3/PI4K2A/ASAH2/LRRK2	13
CC	GO:0098858	actin-based cell projection	10/259	208/19717	0.00044403	0.0041338	0.00333481	CD44/EPHA4/HLA-G/PDGFA/PDGFRA/TGFB1/NLGN1/WWOX/LRRK2/MUC20	10
CC	GO:0030672	synaptic vesicle membrane	7/259	104/19717	0.000447534	0.0041338	0.00333481	RAB3B/RAB27B/SYN1/SYT1/SYT4/RPH3A/LRRK2	7
CC	GO:0099501	exocytic vesicle membrane	7/259	104/19717	0.000447534	0.0041338	0.00333481	RAB3B/RAB27B/SYN1/SYT1/SYT4/RPH3A/LRRK2	7
CC	GO:0060205	cytoplasmic vesicle lumen	13/259	338/19717	0.000561884	0.00497623	0.00401441	AHSG/APOE/CTSC/CLU/PCSK1/PDGFA/PDGFB/SERPINA1/PROS1/QSOX1/RAB27A/SLPI/TGFB1	13
CC	GO:0031983	vesicle lumen	13/259	339/19717	0.000577587	0.00497623	0.00401441	AHSG/APOE/CTSC/CLU/PCSK1/PDGFA/PDGFB/SERPINA1/PROS1/QSOX1/RAB27A/SLPI/TGFB1	13
CC	GO:0098993	anchored component of synaptic vesicle membrane	3/259	13/19717	0.000581269	0.00497623	0.00401441	RAB3B/RAB27B/SYN1	3
CC	GO:0030667	secretory granule membrane	12/259	298/19717	0.000609748	0.00509575	0.00411084	CD44/CD55/FCGR2A/PAM/RAB27A/RAB27B/SNAP25/SYT1/SYT4/TLR2/TMC6/ATP11A	12
CC	GO:0030662	coated vesicle membrane	9/259	182/19717	0.0006968	0.00568783	0.00458847	APOE/HIP1/HLA-G/LRP2/SLC18A3/SREBF1/SYT1/WNT5A/KDELR3	9
CC	GO:0031901	early endosome membrane	8/259	149/19717	0.000805709	0.00642736	0.00518507	EPHA4/HLA-G/CLIP3/PMEPA1/STEAP4/WNT3A/CLVS2/CLVS1	8
CC	GO:0043025	neuronal cell body	16/259	497/19717	0.00093486	0.0072919	0.00588251	AGRP/APOE/PLK3/CRYAB/EPHA4/FLNA/KCNJ2/MPL/PAM/PDE9A/SYT4/TGFB1/ARHGEF2/STMN2/PI4K2A/LRRK2	16
CC	GO:0034774	secretory granule lumen	12/259	321/19717	0.00116129	0.00886113	0.00714843	AHSG/CTSC/CLU/PCSK1/PDGFA/PDGFB/SERPINA1/PROS1/QSOX1/RAB27A/SLPI/TGFB1	12
CC	GO:0043198	dendritic shaft	4/259	36/19717	0.00123128	0.00919531	0.00741802	EPHA4/FLNA/ARHGEF2/NLGN1	4
CC	GO:0010008	endosome membrane	15/259	479/19717	0.00175662	0.0128453	0.0103625	EPHA4/HLA-G/RAB27A/RAB27B/BAIAP3/RNF144A/CLIP3/PMEPA1/STEAP4/WNT3A/CLVS2/CLVS1/PCSK9/STEAP2/RAB15	15
CC	GO:0030669	clathrin-coated endocytic vesicle membrane	4/259	44/19717	0.0026142	0.0187262	0.0151067	APOE/HIP1/SLC18A3/WNT5A	4
CC	GO:0005901	caveola	5/259	80/19717	0.00406132	0.0285086	0.0229984	CDH15/F2R/NOS3/ASAH2/LRRK2	5
CC	GO:0030665	clathrin-coated vesicle membrane	6/259	115/19717	0.00414227	0.0285086	0.0229984	APOE/HIP1/LRP2/SLC18A3/SYT1/WNT5A	6
CC	GO:0097060	synaptic membrane	13/259	432/19717	0.00487052	0.032876	0.0265217	CRYAB/EPHA4/F2R/HIP1/SNAP25/SYT1/STX11/CSPG5/NLGN1/RPH3A/SYNE1/PI4K2A/CLSTN2	13
CC	GO:0030134	COPII-coated ER to Golgi transport vesicle	5/259	93/19717	0.00765635	0.0498933	0.0402498	CTSC/HLA-G/SERPINA1/SREBF1/PCSK9	5
CC	GO:0030140	trans-Golgi network transport vesicle	3/259	31/19717	0.00767589	0.0498933	0.0402498	RAB27B/SLC18A3/STEAP2	3
CC	GO:0045334	clathrin-coated endocytic vesicle	4/259	63/19717	0.00945227	0.0603227	0.0486634	APOE/HIP1/SLC18A3/WNT5A	4
CC	GO:0032585	multivesicular body membrane	2/259	12/19717	0.0104011	0.0629445	0.0507784	RAB27A/RAB27B	2
CC	GO:0060198	clathrin-sculpted vesicle	2/259	12/19717	0.0104011	0.0629445	0.0507784	SLC18A3/SYT1	2
CC	GO:1990909	Wnt signalosome	2/259	12/19717	0.0104011	0.0629445	0.0507784	WNT3/LRRK2	2
CC	GO:0044853	plasma membrane raft	5/259	109/19717	0.0145538	0.0865829	0.0698479	CDH15/F2R/NOS3/ASAH2/LRRK2	5
CC	GO:0030122	AP-2 adaptor complex	2/259	15/19717	0.0161245	0.0927372	0.0748127	HIP1/SLC18A3	2
CC	GO:0031083	BLOC-1 complex	2/259	15/19717	0.0161245	0.0927372	0.0748127	SNAP25/PI4K2A	2
CC	GO:0019898	extrinsic component of membrane	9/259	295/19717	0.0163809	0.0927372	0.0748127	CDH15/DEFB1/GFRA1/HIP1/SNAP25/SYN1/CYTH3/RPH3A/PCSK9	9
CC	GO:0030660	Golgi-associated vesicle membrane	5/259	114/19717	0.0173577	0.096707	0.0780152	HLA-G/SLC18A3/SREBF1/CSPG5/KDELR3	5
CC	GO:0031594	neuromuscular junction	4/259	76/19717	0.0178512	0.0979026	0.0789798	CDH15/EPHA4/F2R/POSTN	4
CC	GO:0030128	clathrin coat of endocytic vesicle	2/259	16/19717	0.0182701	0.0986584	0.0795895	HIP1/SLC18A3	2
MF	GO:0016757	transferase activity, transferring glycosyl groups	30/240	280/17697	1.53824e-18	6.22986e-16	5.13285e-16	EXTL1/FUT1/FUT2/FUT3/MGAT3/ST8SIA4/ST8SIA2/B3GALT2/ST3GAL5/B4GALT6/B3GALT5/B3GNT3/FUT9/GALNT5/MGAT4B/B3GAT1/GALNT9/ST8SIA3/GCNT4/GALNT7/CSGALNACT1/ST6GALNAC5/GLT8D2/B3GNT7/GALNT13/B4GALNT2/B3GNT6/B4GALNT3/B3GNT8/GALNTL6	30
MF	GO:0008376	acetylgalactosaminyltransferase activity	14/240	47/17697	1.11774e-15	2.26343e-13	1.86487e-13	B3GALT2/B3GALT5/B3GNT3/GALNT5/GALNT9/GALNT7/CSGALNACT1/B3GNT7/GALNT13/B4GALNT2/B3GNT6/B4GALNT3/B3GNT8/GALNTL6	14
MF	GO:0016758	transferase activity, transferring hexosyl groups	24/240	216/17697	2.16889e-15	2.928e-13	2.41241e-13	EXTL1/FUT1/FUT2/FUT3/MGAT3/B3GALT2/B4GALT6/B3GALT5/B3GNT3/FUT9/GALNT5/MGAT4B/B3GAT1/GALNT9/GCNT4/GALNT7/CSGALNACT1/B3GNT7/GALNT13/B4GALNT2/B3GNT6/B4GALNT3/B3GNT8/GALNTL6	24
MF	GO:0008194	UDP-glycosyltransferase activity	20/240	151/17697	1.73643e-14	1.75813e-12	1.44855e-12	EXTL1/MGAT3/B3GALT2/B4GALT6/B3GALT5/B3GNT3/GALNT5/MGAT4B/B3GAT1/GALNT9/GCNT4/GALNT7/CSGALNACT1/B3GNT7/GALNT13/B4GALNT2/B3GNT6/B4GALNT3/B3GNT8/GALNTL6	20
MF	GO:0005539	glycosaminoglycan binding	19/240	229/17697	3.36317e-10	2.72417e-08	2.24447e-08	ACAN/APLP1/APOE/BGN/CD44/VCAN/DCN/FGF7/FGFR2/PCSK6/PLA2G5/SHH/SOD3/TLR2/TENM1/POSTN/SOST/BCAN/AGRN	19
MF	GO:0008378	galactosyltransferase activity	8/240	36/17697	2.22046e-08	1.49881e-06	1.23489e-06	B3GALT2/B4GALT6/B3GALT5/B3GNT3/B3GAT1/B3GNT7/B3GNT6/B3GNT8	8
MF	GO:0008146	sulfotransferase activity	9/240	52/17697	2.95828e-08	1.71158e-06	1.41019e-06	CHST6/CHST2/HS3ST4/CHST11/HS3ST6/CHST9/HS6ST2/DSEL/CHST13	9
MF	GO:0048018	receptor ligand activity	23/240	482/17697	1.84838e-07	9.35741e-06	7.70968e-06	AGRP/BMP1/FGF7/GDNF/LHB/NPY/OGN/PDGFA/PDGFB/SHH/SPP1/TGFB1/VGF/WNT3/WNT5A/WNT7A/WNT7B/FGF23/GDF15/CXCL14/COLEC10/CSPG5/WNT3A	23
MF	GO:0030021	extracellular matrix structural constituent conferring compression resistance	6/240	22/17697	3.63566e-07	1.51067e-05	1.24466e-05	ACAN/BGN/VCAN/DCN/FMOD/OGN	6
MF	GO:0016782	transferase activity, transferring sulfur-containing groups	9/240	69/17697	3.73004e-07	1.51067e-05	1.24466e-05	CHST6/CHST2/HS3ST4/CHST11/HS3ST6/CHST9/HS6ST2/DSEL/CHST13	9
MF	GO:0140103	catalytic activity, acting on a glycoprotein	6/240	23/17697	4.86324e-07	1.79056e-05	1.47526e-05	MGAT3/B3GNT3/MGAT4B/GCNT4/B3GNT6/B4GALNT3	6
MF	GO:0008375	acetylglucosaminyltransferase activity	8/240	55/17697	7.15594e-07	2.41513e-05	1.98985e-05	EXTL1/MGAT3/B3GNT3/MGAT4B/GCNT4/B3GNT7/B3GNT6/B3GNT8	8
MF	GO:0005201	extracellular matrix structural constituent	12/240	163/17697	2.34517e-06	7.30611e-05	6.01959e-05	ACAN/BGN/COL1A1/VCAN/DCN/FMOD/MUC4/MUC5AC/OGN/TGFBI/POSTN/AGRN	12
MF	GO:0004653	polypeptide N-acetylgalactosaminyltransferase activity	5/240	19/17697	4.3807e-06	0.000126727	0.000104412	GALNT5/GALNT9/GALNT7/GALNT13/GALNTL6	5
MF	GO:0008373	sialyltransferase activity	5/240	20/17697	5.77653e-06	0.000155966	0.000128503	ST8SIA4/ST8SIA2/ST3GAL5/ST8SIA3/ST6GALNAC5	5
MF	GO:0048407	platelet-derived growth factor binding	4/240	11/17697	1.01023e-05	0.000255716	0.000210687	COL1A1/PDGFA/PDGFB/PDGFRA	4
MF	GO:0005109	frizzled binding	6/240	39/17697	1.31085e-05	0.00031229	0.000257299	MYOC/WNT3/WNT5A/WNT7A/WNT7B/WNT3A	6
MF	GO:0008083	growth factor activity	11/240	163/17697	1.42259e-05	0.000319572	0.000263299	BMP1/FGF7/GDNF/OGN/PDGFA/PDGFB/TGFB1/VGF/FGF23/GDF15/CSPG5	11
MF	GO:0033691	sialic acid binding	4/240	12/17697	1.49923e-05	0.000319572	0.000263299	ST8SIA4/ST8SIA2/ST8SIA3/AGRN	4
MF	GO:0019838	growth factor binding	10/240	137/17697	1.77621e-05	0.000359683	0.000296347	COL1A1/FGFR3/FGFR2/IGFBP1/IGFBP6/PCSK6/PDGFA/PDGFB/PDGFRA/RHBDF1	10
MF	GO:0008417	fucosyltransferase activity	4/240	13/17697	2.14252e-05	0.0004132	0.00034044	FUT1/FUT2/FUT3/FUT9	4
MF	GO:0008201	heparin binding	10/240	169/17697	0.000106065	0.00195256	0.00160874	APLP1/APOE/FGF7/FGFR2/PCSK6/PLA2G5/SOD3/TENM1/POSTN/SOST	10
MF	GO:0050840	extracellular matrix binding	6/240	57/17697	0.00011895	0.00209456	0.00172573	BGN/DCN/SHH/SPP1/TGFBI/AGRN	6
MF	GO:0042056	chemoattractant activity	5/240	38/17697	0.000153265	0.00256497	0.00211331	FGF7/GDNF/PDGFB/WNT5A/COLEC10	5
MF	GO:0005540	hyaluronic acid binding	4/240	21/17697	0.000164665	0.00256497	0.00211331	ACAN/CD44/VCAN/BCAN	4
MF	GO:0050750	low-density lipoprotein particle receptor binding	4/240	21/17697	0.000164665	0.00256497	0.00211331	APOE/CLU/SYT1/PCSK9	4
MF	GO:0035250	UDP-galactosyltransferase activity	4/240	23/17697	0.000238492	0.00357738	0.00294745	B3GALT2/B4GALT6/B3GALT5/B3GAT1	4
MF	GO:0048531	beta-1,3-galactosyltransferase activity	3/240	10/17697	0.00027549	0.00398477	0.0032831	B3GALT2/B3GALT5/B3GAT1	3
MF	GO:0031406	carboxylic acid binding	10/240	193/17697	0.000312347	0.00436209	0.00359397	ACAN/CD44/VCAN/NOS3/PAM/ST8SIA4/ST8SIA2/ST8SIA3/BCAN/AGRN	10
MF	GO:0004252	serine-type endopeptidase activity	9/240	160/17697	0.000341203	0.00460623	0.00379513	CTSC/F7/F10/PCSK6/PCSK1/PROC/PROZ/KLK11/PCSK9	9
MF	GO:0017075	syntaxin-1 binding	4/240	26/17697	0.000390001	0.00493595	0.00406678	SNAP25/SYT1/SYT4/LRRK2	4
MF	GO:0070325	lipoprotein particle receptor binding	4/240	26/17697	0.000390001	0.00493595	0.00406678	APOE/CLU/SYT1/PCSK9	4
MF	GO:0001664	G protein-coupled receptor binding	12/240	280/17697	0.000459447	0.00563866	0.00464576	APLP1/BDKRB2/DEFB1/FLNA/MYOC/NPY/WNT3/WNT5A/WNT7A/WNT7B/CXCL14/WNT3A	12
MF	GO:0043177	organic acid binding	10/240	205/17697	0.000502982	0.0059914	0.00493639	ACAN/CD44/VCAN/NOS3/PAM/ST8SIA4/ST8SIA2/ST8SIA3/BCAN/AGRN	10
MF	GO:1901681	sulfur compound binding	11/240	250/17697	0.000634512	0.00734221	0.00604934	APLP1/APOE/FGF7/FGFR2/PCSK6/PLA2G5/SOD3/TENM1/POSTN/SOST/AGRN	11
MF	GO:0001540	amyloid-beta binding	6/240	78/17697	0.000664683	0.00747769	0.00616095	APOE/CLU/CRYAB/EPHA4/TLR2/NLGN1	6
MF	GO:0004175	endopeptidase activity	15/240	427/17697	0.000759187	0.00831002	0.00684672	BMP1/CTSC/F7/F10/MMP11/MMP14/MMP16/PCSK6/PCSK1/PHEX/PROC/PROZ/KLK11/PCSK9/CAPN8	15
MF	GO:0008236	serine-type peptidase activity	9/240	182/17697	0.000865951	0.00922921	0.00760406	CTSC/F7/F10/PCSK6/PCSK1/PROC/PROZ/KLK11/PCSK9	9
MF	GO:0005161	platelet-derived growth factor receptor binding	3/240	15/17697	0.000993433	0.00997332	0.00821713	PDGFA/PDGFB/PDGFRA	3
MF	GO:0034483	heparan sulfate sulfotransferase activity	3/240	15/17697	0.000993433	0.00997332	0.00821713	HS3ST4/HS3ST6/HS6ST2	3
MF	GO:0017171	serine hydrolase activity	9/240	186/17697	0.00100964	0.00997332	0.00821713	CTSC/F7/F10/PCSK6/PCSK1/PROC/PROZ/KLK11/PCSK9	9
MF	GO:0048306	calcium-dependent protein binding	5/240	61/17697	0.00141086	0.0136047	0.0112091	S100A1/SNAP25/SYN1/SYT1/STMN2	5
MF	GO:0031489	myosin V binding	3/240	17/17697	0.00145525	0.0137064	0.0112929	RAB3B/RAB27A/RAB27B	3
MF	GO:0008017	microtubule binding	10/240	246/17697	0.00200103	0.0184185	0.0151753	CRYAB/ARHGEF2/KIF20A/TPPP/CLIP3/CDK5RAP2/MTUS1/FHDC1/LRRK2/JAKMIP3	10
MF	GO:0005518	collagen binding	5/240	67/17697	0.00214487	0.0193038	0.0159046	CD44/DCN/PDGFA/PDGFB/TGFBI	5
MF	GO:0019905	syntaxin binding	5/240	75/17697	0.00351271	0.0309271	0.0254812	SNAP25/SYT1/SYT4/BAIAP3/LRRK2	5
MF	GO:0000149	SNARE binding	6/240	110/17697	0.00387499	0.0326952	0.026938	SNAP25/SYT1/SYT4/STX11/BAIAP3/LRRK2	6
MF	GO:1902936	phosphatidylinositol bisphosphate binding	6/240	110/17697	0.00387499	0.0326952	0.026938	HIP1/KCNJ2/SYT1/RPH3A/CLVS2/CLVS1	6
MF	GO:0030246	carbohydrate binding	10/240	271/17697	0.00400353	0.0330904	0.0272635	ACAN/VCAN/PAM/COLEC10/GALNT5/GALNT9/GALNT7/BCAN/GALNT13/GALNTL6	10
MF	GO:0001968	fibronectin binding	3/240	27/17697	0.00566542	0.0451958	0.0372373	IGFBP6/MYOC/SDC4	3
MF	GO:0005543	phospholipid binding	13/240	427/17697	0.00569132	0.0451958	0.0372373	APOE/F10/HIP1/KCNJ2/PLA2G5/SYT1/SYT4/WNT5A/BAIAP3/CYTH3/RPH3A/CLVS2/CLVS1	13
MF	GO:0005184	neuropeptide hormone activity	3/240	28/17697	0.00628252	0.0457682	0.0377089	AGRP/NPY/VGF	3
MF	GO:0019706	protein-cysteine S-palmitoyltransferase activity	3/240	28/17697	0.00628252	0.0457682	0.0377089	ZDHHC11/GOLGA7B/ZDHHC11B	3
MF	GO:0019707	protein-cysteine S-acyltransferase activity	3/240	28/17697	0.00628252	0.0457682	0.0377089	ZDHHC11/GOLGA7B/ZDHHC11B	3
MF	GO:0080025	phosphatidylinositol-3,5-bisphosphate binding	3/240	28/17697	0.00628252	0.0457682	0.0377089	HIP1/CLVS2/CLVS1	3
MF	GO:0015631	tubulin binding	11/240	336/17697	0.00632844	0.0457682	0.0377089	CRYAB/ARHGEF2/KIF20A/STMN2/TPPP/CLIP3/CDK5RAP2/MTUS1/FHDC1/LRRK2/JAKMIP3	11
MF	GO:1901981	phosphatidylinositol phosphate binding	7/240	161/17697	0.0064627	0.0459192	0.0378334	HIP1/KCNJ2/SYT1/CYTH3/RPH3A/CLVS2/CLVS1	7
MF	GO:0030276	clathrin binding	4/240	57/17697	0.00742811	0.0518687	0.0427352	HIP1/SYT1/SYT4/LRRK2	4
MF	GO:0005319	lipid transporter activity	6/240	131/17697	0.00895409	0.0614645	0.0506413	APOE/MTTP/ABCB11/ABCA6/ABCA12/ATP8A2	6
MF	GO:0016417	S-acyltransferase activity	3/240	32/17697	0.00914192	0.061708	0.0508419	ZDHHC11/GOLGA7B/ZDHHC11B	3
MF	GO:0070851	growth factor receptor binding	6/240	134/17697	0.00994812	0.0640093	0.052738	FGF7/HIP1/PDGFA/PDGFB/PDGFRA/FGF23	6
MF	GO:0004714	transmembrane receptor protein tyrosine kinase activity	4/240	62/17697	0.00995512	0.0640093	0.052738	EPHA4/FGFR3/FGFR2/PDGFRA	4
MF	GO:0015020	glucuronosyltransferase activity	3/240	33/17697	0.00995701	0.0640093	0.052738	EXTL1/B3GAT1/CSGALNACT1	3
MF	GO:0061134	peptidase regulator activity	8/240	219/17697	0.0102096	0.0646073	0.0532307	AHSG/CTSC/GPC3/SERPINA1/PROS1/SLPI/PCSK1N/BIRC7	8
MF	GO:0031994	insulin-like growth factor I binding	2/240	12/17697	0.0110523	0.0688646	0.0567383	IGFBP1/IGFBP6	2
MF	GO:0030414	peptidase inhibitor activity	7/240	182/17697	0.012222	0.0749985	0.0617922	AHSG/GPC3/SERPINA1/PROS1/SLPI/PCSK1N/BIRC7	7
MF	GO:0039706	co-receptor binding	2/240	13/17697	0.012946	0.0779091	0.0641902	WNT3A/LRRK2	2
MF	GO:0004222	metalloendopeptidase activity	5/240	103/17697	0.0131509	0.0779091	0.0641902	BMP1/MMP11/MMP14/MMP16/PHEX	5
MF	GO:0003924	GTPase activity	10/240	324/17697	0.0132734	0.0779091	0.0641902	GBP1/GBP3/RAB3B/RAB27A/RAB27B/RAP1GAP/RHOBTB3/RAB34/LRRK2/RAB15	10
MF	GO:0016409	palmitoyltransferase activity	3/240	39/17697	0.0157184	0.0900421	0.0741867	ZDHHC11/GOLGA7B/ZDHHC11B	3
MF	GO:0017022	myosin binding	4/240	71/17697	0.0157852	0.0900421	0.0741867	MYOC/RAB3B/RAB27A/RAB27B	4
MF	GO:0017160	Ral GTPase binding	2/240	15/17697	0.0171201	0.0963007	0.0793432	FLNA/RAB34	2
KEGG	hsa00601	Glycosphingolipid biosynthesis - lacto and neolacto series	7/132	27/8076	1.79693e-07	3.34228e-05	2.894e-05	FUT1/FUT2/FUT3/B3GALT2/B3GALT5/B3GNT3/FUT9	7
KEGG	hsa00512	Mucin type O-glycan biosynthesis	7/132	32/8076	6.36265e-07	5.91726e-05	5.12361e-05	GALNT5/GALNT9/GCNT4/GALNT7/GALNT13/B3GNT6/GALNTL6	7
KEGG	hsa05205	Proteoglycans in cancer	15/132	205/8076	1.10359e-06	6.84226e-05	5.92453e-05	CD44/COL1A1/DCN/FLNA/GPC3/SDC1/SDC4/SHH/TGFB1/TLR2/WNT3/WNT5A/WNT7A/WNT7B/WNT3A	15
KEGG	hsa04610	Complement and coagulation cascades	9/132	85/8076	9.12956e-06	0.000424525	0.000367585	BDKRB2/CLU/CD55/F2R/F7/F10/SERPINA1/PROC/PROS1	9
KEGG	hsa00603	Glycosphingolipid biosynthesis - globo and isoglobo series	4/132	15/8076	8.09453e-05	0.00301117	0.00260729	FUT1/FUT2/B3GALT5/FUT9	4
KEGG	hsa05226	Gastric cancer	10/132	149/8076	0.000154047	0.00477546	0.00413495	FGF7/FGFR2/SHH/TGFB1/WNT3/WNT5A/WNT7A/WNT7B/FGF23/WNT3A	10
KEGG	hsa05217	Basal cell carcinoma	6/132	63/8076	0.000538823	0.0143173	0.012397	SHH/WNT3/WNT5A/WNT7A/WNT7B/WNT3A	6
KEGG	hsa00514	Other types of O-glycan biosynthesis	5/132	47/8076	0.000956378	0.0222358	0.0192534	GALNT5/GALNT9/GALNT7/GALNT13/GALNTL6	5
KEGG	hsa00533	Glycosaminoglycan biosynthesis - keratan sulfate	3/132	14/8076	0.00136167	0.0281412	0.0243667	CHST6/CHST2/B3GNT7	3
KEGG	hsa05224	Breast cancer	8/132	147/8076	0.00274144	0.0477932	0.0413829	FGF7/NOTCH3/WNT3/WNT5A/WNT7A/WNT7B/FGF23/WNT3A	8
KEGG	hsa04514	Cell adhesion molecules	8/132	149/8076	0.00298055	0.0477932	0.0413829	CDH15/VCAN/HLA-G/NCAM1/SDC1/SDC4/SDC3/NLGN1	8
KEGG	hsa04512	ECM-receptor interaction	6/132	88/8076	0.00308343	0.0477932	0.0413829	CD44/COL1A1/SDC1/SDC4/SPP1/AGRN	6
KEGG	hsa00532	Glycosaminoglycan biosynthesis - chondroitin sulfate / dermatan sulfate	3/132	20/8076	0.0039698	0.0567986	0.0491805	CHST11/CSGALNACT1/CHST13	3
KEGG	hsa02010	ABC transporters	4/132	45/8076	0.0060512	0.0781974	0.0677092	DEFB1/ABCB11/ABCA6/ABCA12	4
KEGG	hsa05218	Melanoma	5/132	72/8076	0.00630625	0.0781974	0.0677092	FGF7/PDGFA/PDGFB/PDGFRA/FGF23	5
KEGG	hsa04015	Rap1 signaling pathway	9/132	210/8076	0.00735404	0.0854907	0.0740242	F2R/FGF7/FGFR3/FGFR2/PDGFA/PDGFB/PDGFRA/RAP1GAP/FGF23	9
KEGG	hsa04979	Cholesterol metabolism	4/132	50/8076	0.00878626	0.0864285	0.0748362	APOE/LRP2/ABCB11/PCSK9	4
KEGG	hsa04550	Signaling pathways regulating pluripotency of stem cells	7/132	143/8076	0.00883464	0.0864285	0.0748362	FGFR3/FGFR2/WNT3/WNT5A/WNT7A/WNT7B/WNT3A	7
KEGG	hsa01521	EGFR tyrosine kinase inhibitor resistance	5/132	79/8076	0.00928072	0.0864285	0.0748362	FGFR3/FGFR2/PDGFA/PDGFB/PDGFRA	5
KEGG	hsa04810	Regulation of actin cytoskeleton	9/132	218/8076	0.00929338	0.0864285	0.0748362	BDKRB2/F2R/FGF7/FGFR3/FGFR2/PDGFA/PDGFB/PDGFRA/FGF23	9
