# Supplementary material for: Golgi-apparatus genes related signature for predicting the progression-free interval of patients with papillary thyroid carcinoma
Source: BMC Med Genomics. 2023 Mar 27;16:60. doi: 10.1186/s12920-023-01485-z (PMC10041766; doi:10.1186/s12920-023-01485-z)
Supplement: Supplementary file 4 — Supplementary Material 4 [file 12920_2023_1485_MOESM4_ESM.xlsx]

## Sheet: Sheet1
Supplementary table 4. Gene set enrichment analyses between high and low risk group in TCGA-THCA dataset
Terms enriched in high risk group
C2 KEGG: 62 terms
NAME	SIZE	ES	NES	NOM p-val	FDR q-val
KEGG_HOMOLOGOUS_RECOMBINATION	26	0.763949	1.88745	0	0.0732952
KEGG_CELL_CYCLE	124	0.620323	1.81934	0	0.0822269
KEGG_DNA_REPLICATION	36	0.733019	1.8078	0	0.0620201
KEGG_P53_SIGNALING_PATHWAY	66	0.577086	1.70572	0.0202429	0.134337
KEGG_ONE_CARBON_POOL_BY_FOLATE	17	0.641944	1.63257	0.008	0.215728
KEGG_MISMATCH_REPAIR	23	0.617788	1.57982	0.027451	0.278076
KEGG_PROGESTERONE_MEDIATED_OOCYTE_MATURATION	85	0.437698	1.38833	0.109504	0.809145
KEGG_PYRIMIDINE_METABOLISM	98	0.421583	1.38088	0.162055	0.73845
KEGG_OOCYTE_MEIOSIS	111	0.398451	1.36043	0.129512	0.724428
KEGG_ALANINE_ASPARTATE_AND_GLUTAMATE_METABOLISM	30	0.414561	1.33889	0.0913349	0.724718
KEGG_AMINO_SUGAR_AND_NUCLEOTIDE_SUGAR_METABOLISM	43	0.432679	1.31377	0.185824	0.737264
KEGG_BIOSYNTHESIS_OF_UNSATURATED_FATTY_ACIDS	20	0.45757	1.28652	0.202703	0.764704
KEGG_NUCLEOTIDE_EXCISION_REPAIR	44	0.452536	1.27594	0.263261	0.738488
KEGG_BASE_EXCISION_REPAIR	34	0.443475	1.26502	0.26378	0.718124
KEGG_ASTHMA	28	0.572328	1.23773	0.283976	0.748587
KEGG_RIBOSOME	88	0.461393	1.18625	0.318637	0.843882
KEGG_BLADDER_CANCER	41	0.387451	1.18614	0.319277	0.794537
KEGG_GLYCOSPHINGOLIPID_BIOSYNTHESIS_LACTO_AND_NEOLACTO_SERIES	26	0.373289	1.13678	0.300242	0.88585
KEGG_GLYOXYLATE_AND_DICARBOXYLATE_METABOLISM	16	0.398073	1.13631	0.305376	0.840783
KEGG_TYPE_I_DIABETES_MELLITUS	41	0.510946	1.1358	0.403259	0.799827
KEGG_LYSOSOME	121	0.335391	1.12231	0.380198	0.793514
KEGG_OTHER_GLYCAN_DEGRADATION	16	0.397728	1.10213	0.400398	0.805067
KEGG_ALLOGRAFT_REJECTION	35	0.536157	1.07679	0.479208	0.83157
KEGG_AMINOACYL_TRNA_BIOSYNTHESIS	22	0.43986	1.06601	0.479691	0.820115
KEGG_SMALL_CELL_LUNG_CANCER	84	0.35919	1.04781	0.452191	0.827672
KEGG_PANCREATIC_CANCER	69	0.338808	1.0133	0.506718	0.872648
KEGG_CHRONIC_MYELOID_LEUKEMIA	73	0.338595	1.01289	0.490421	0.841045
KEGG_SPHINGOLIPID_METABOLISM	36	0.331628	1.01113	0.496868	0.815192
KEGG_FRUCTOSE_AND_MANNOSE_METABOLISM	33	0.325265	1.00132	0.481953	0.807654
KEGG_ETHER_LIPID_METABOLISM	30	0.326879	0.994334	0.468889	0.794205
KEGG_PATHOGENIC_ESCHERICHIA_COLI_INFECTION	56	0.303991	0.994007	0.467641	0.769465
KEGG_VIRAL_MYOCARDITIS	68	0.356534	0.953362	0.53211	0.826872
KEGG_PURINE_METABOLISM	154	0.260033	0.935431	0.56	0.8369
KEGG_UBIQUITIN_MEDIATED_PROTEOLYSIS	130	0.31028	0.934091	0.611969	0.815312
KEGG_ALPHA_LINOLENIC_ACID_METABOLISM	19	0.34068	0.93232	0.548165	0.795475
KEGG_GALACTOSE_METABOLISM	26	0.277622	0.908802	0.584551	0.816835
KEGG_GRAFT_VERSUS_HOST_DISEASE	37	0.451391	0.892145	0.617587	0.826082
KEGG_PENTOSE_AND_GLUCURONATE_INTERCONVERSIONS	28	0.297771	0.883513	0.597598	0.819326
KEGG_GLYCOSAMINOGLYCAN_DEGRADATION	21	0.297934	0.869743	0.599537	0.825929
KEGG_AUTOIMMUNE_THYROID_DISEASE	50	0.355748	0.86615	0.591418	0.811882
KEGG_NON_SMALL_CELL_LUNG_CANCER	54	0.282846	0.864959	0.635644	0.794196
KEGG_NOD_LIKE_RECEPTOR_SIGNALING_PATHWAY	61	0.316874	0.861407	0.612903	0.781311
KEGG_CELL_ADHESION_MOLECULES_CAMS	128	0.320372	0.859248	0.61191	0.768323
KEGG_CYTOKINE_CYTOKINE_RECEPTOR_INTERACTION	262	0.296164	0.83871	0.648421	0.786601
KEGG_LEISHMANIA_INFECTION	70	0.343234	0.832943	0.616935	0.779205
KEGG_INTESTINAL_IMMUNE_NETWORK_FOR_IGA_PRODUCTION	46	0.381619	0.814063	0.668033	0.792932
KEGG_ERBB_SIGNALING_PATHWAY	86	0.251517	0.80575	0.665347	0.78997
KEGG_NATURAL_KILLER_CELL_MEDIATED_CYTOTOXICITY	132	0.276656	0.798128	0.671968	0.78656
KEGG_ANTIGEN_PROCESSING_AND_PRESENTATION	81	0.294257	0.790561	0.666667	0.781732
KEGG_GLIOMA	65	0.24459	0.78458	0.693446	0.775658
KEGG_CHEMOKINE_SIGNALING_PATHWAY	185	0.256874	0.765754	0.702648	0.789949
KEGG_PROTEASOME	45	0.237886	0.757439	0.697531	0.787871
KEGG_APOPTOSIS	87	0.245818	0.753676	0.703846	0.778203
KEGG_CITRATE_CYCLE_TCA_CYCLE	31	0.288762	0.751337	0.688492	0.766962
KEGG_CYSTEINE_AND_METHIONINE_METABOLISM	34	0.222837	0.740976	0.80625	0.768425
KEGG_FC_GAMMA_R_MEDIATED_PHAGOCYTOSIS	93	0.233526	0.727156	0.75098	0.774325
KEGG_JAK_STAT_SIGNALING_PATHWAY	155	0.224891	0.715129	0.828221	0.776942
KEGG_SNARE_INTERACTIONS_IN_VESICULAR_TRANSPORT	38	0.230795	0.702138	0.786408	0.780601
KEGG_RNA_POLYMERASE	29	0.243974	0.694773	0.777108	0.777438
KEGG_SYSTEMIC_LUPUS_ERYTHEMATOSUS	55	0.308943	0.692534	0.754678	0.767887
KEGG_RIG_I_LIKE_RECEPTOR_SIGNALING_PATHWAY	69	0.195851	0.624166	0.87963	0.841307
KEGG_SPLICEOSOME	126	0.109951	0.324246	0.988304	0.997715
C5 GO: 1932 terms
NAME	SIZE	ES	NES	NOM p-val	FDR q-val
GO_MITOTIC_SPINDLE_ASSEMBLY	61	0.750649	1.99892	0	0.245477
GO_INTERLEUKIN_1_RECEPTOR_BINDING	16	0.863453	1.94621	0	0.231945
GO_POSITIVE_REGULATION_OF_CHROMOSOME_SEGREGATION	30	0.721582	1.93621	0	0.180326
GO_REGULATION_OF_TRANSCRIPTION_INVOLVED_IN_G1_S_TRANSITION_OF_MITOTIC_CELL_CYCLE	35	0.770202	1.93172	0	0.147662
GO_CORNIFIED_ENVELOPE	44	0.745511	1.9168	0.00232019	0.145816
GO_SINGLE_STRANDED_DNA_HELICASE_ACTIVITY	18	0.840673	1.88177	0	0.204687
GO_POSITIVE_REGULATION_OF_CHROMOSOME_SEPARATION	15	0.726241	1.86362	0	0.224271
GO_SPINDLE_MICROTUBULE	64	0.694023	1.86055	0	0.20537
GO_DNA_REPLICATION_INITIATION	39	0.755642	1.85839	0	0.190091
GO_DNA_POLYMERASE_BINDING	20	0.707372	1.8564	0	0.175051
GO_CYTOKINETIC_PROCESS	39	0.662688	1.8313	0	0.225698
GO_CENTROMERE_COMPLEX_ASSEMBLY	37	0.775333	1.82859	0	0.215312
GO_FEMALE_MEIOTIC_NUCLEAR_DIVISION	28	0.672076	1.8279	0.00210084	0.200621
GO_CONDENSED_CHROMOSOME_CENTROMERIC_REGION	111	0.673234	1.82192	0	0.201153
GO_PROTEIN_LOCALIZATION_TO_CHROMATIN	21	0.760348	1.82181	0	0.188133
GO_POSTSYNAPTIC_CYTOSKELETON_ORGANIZATION	15	0.744735	1.81888	0.00224215	0.18366
GO_POSITIVE_REGULATION_OF_MITOTIC_SISTER_CHROMATID_SEGREGATION	19	0.73543	1.81153	0	0.190024
GO_ATTACHMENT_OF_SPINDLE_MICROTUBULES_TO_KINETOCHORE	30	0.708212	1.80804	0.00202429	0.186997
GO_POSITIVE_REGULATION_OF_DNA_REPLICATION	39	0.640206	1.8049	0	0.185205
GO_CHROMOSOME_CONDENSATION	32	0.670679	1.79959	0.00813008	0.188722
GO_REGULATION_OF_MITOTIC_SPINDLE_ASSEMBLY	17	0.704184	1.7964	0	0.188198
GO_DNA_UNWINDING_INVOLVED_IN_DNA_REPLICATION	15	0.796099	1.79541	0	0.181632
GO_REGULATION_OF_DOUBLE_STRAND_BREAK_REPAIR_VIA_HOMOLOGOUS_RECOMBINATION	40	0.701509	1.79212	0.00204918	0.181349
GO_KINETOCHORE	128	0.65496	1.788	0.002	0.182602
GO_MITOTIC_SPINDLE_ORGANIZATION	111	0.642998	1.78571	0	0.180118
GO_REGULATION_OF_WATER_LOSS_VIA_SKIN	28	0.648979	1.77405	0.00623701	0.199014
GO_CONDENSED_CHROMOSOME	205	0.582805	1.77136	0.00409836	0.198385
GO_PRONUCLEUS	15	0.745064	1.77051	0.00204918	0.19314
GO_KINETOCHORE_ORGANIZATION	20	0.837072	1.76901	0	0.189722
GO_MITOTIC_CHROMOSOME_CONDENSATION	15	0.821278	1.76891	0	0.183585
GO_CONDENSED_NUCLEAR_CHROMOSOME_CENTROMERIC_REGION	28	0.724327	1.7633	0	0.190381
GO_DNA_REPLICATION_INDEPENDENT_NUCLEOSOME_ORGANIZATION	35	0.726015	1.76246	0	0.186051
GO_CHROMATIN_REMODELING_AT_CENTROMERE	28	0.776211	1.76058	0	0.185853
GO_DNA_REPLICATION_CHECKPOINT	17	0.783254	1.75905	0.00400802	0.183931
GO_DEOXYRIBONUCLEOTIDE_BIOSYNTHETIC_PROCESS	15	0.705558	1.75885	0.00206186	0.179115
GO_CHROMOSOME_CENTROMERIC_REGION	183	0.625493	1.7583	0.00203666	0.175219
GO_METAPHASE_PLATE_CONGRESSION	60	0.620113	1.75372	0.00199601	0.181172
GO_CELL_CYCLE_DNA_REPLICATION	64	0.675341	1.75166	0.00200803	0.182122
GO_MITOTIC_SISTER_CHROMATID_SEGREGATION	154	0.608287	1.74935	0.00206612	0.182255
GO_MITOTIC_NUCLEAR_DIVISION	266	0.561107	1.74805	0.0040404	0.180488
GO_MITOTIC_DNA_REPLICATION	15	0.827546	1.74747	0	0.177227
GO_DNA_STRAND_ELONGATION	25	0.752673	1.74442	0	0.180166
GO_REGULATION_OF_SPINDLE_ASSEMBLY	24	0.647724	1.74338	0	0.178345
GO_RESPONSE_TO_STEROL_DEPLETION	16	0.697085	1.74223	0	0.176778
GO_REPLICATION_FORK	67	0.651731	1.7389	0.0039604	0.179756
GO_TELOMERE_MAINTENANCE_VIA_SEMI_CONSERVATIVE_REPLICATION	27	0.706074	1.73584	0.00389864	0.18221
GO_POSITIVE_REGULATION_OF_CELL_AGING	21	0.646535	1.73563	0.00902527	0.178715
GO_SISTER_CHROMATID_SEGREGATION	187	0.584488	1.73531	0.00205761	0.175487
GO_RECOMBINATIONAL_REPAIR	129	0.607914	1.72957	0.00401606	0.182726
GO_KINETOCHORE_ASSEMBLY	15	0.811505	1.72952	0	0.179175
GO_CYCLIN_DEPENDENT_PROTEIN_KINASE_HOLOENZYME_COMPLEX	42	0.626462	1.72695	0.00594059	0.180862
GO_CHROMOSOME_LOCALIZATION	74	0.582326	1.72485	0.012024	0.18163
GO_MICROTUBULE_CYTOSKELETON_ORGANIZATION_INVOLVED_IN_MITOSIS	137	0.622959	1.72456	0.00407332	0.178857
GO_DNA_DAMAGE_RESPONSE_SIGNAL_TRANSDUCTION_RESULTING_IN_TRANSCRIPTION	18	0.646376	1.72208	0.00976562	0.180628
GO_SEQUESTERING_OF_METAL_ION	16	0.641757	1.71984	0.0120724	0.181674
GO_DNA_DEPENDENT_DNA_REPLICATION	145	0.621908	1.71564	0.00400802	0.186528
GO_MITOTIC_CELL_CYCLE_CHECKPOINT	161	0.579465	1.71453	0.0100806	0.185458
GO_SPINDLE_ASSEMBLY	109	0.58153	1.71045	0.0020284	0.191541
GO_REGULATION_OF_CHROMOSOME_SEGREGATION	101	0.597579	1.70995	0.00847458	0.189236
GO_DNA_REPLICATION_ORIGIN_BINDING	23	0.752252	1.70908	0	0.187829
GO_CHROMOSOMAL_REGION	314	0.572384	1.70837	0.0100604	0.186196
GO_CENTROSOME_SEPARATION	15	0.750484	1.70773	0.00410678	0.184288
GO_CELL_CYCLE_CHECKPOINT	211	0.573714	1.70686	0.01222	0.182949
GO_INTRINSIC_APOPTOTIC_SIGNALING_PATHWAY_IN_RESPONSE_TO_DNA_DAMAGE_BY_P53_CLASS_MEDIATOR	44	0.537564	1.70471	0.0137255	0.183783
GO_NUCLEAR_CHROMOSOME_SEGREGATION	251	0.532828	1.70173	0.00835073	0.187035
GO_CONDENSED_NUCLEAR_CHROMOSOME_KINETOCHORE	17	0.802481	1.69959	0.00201613	0.188253
GO_G2_DNA_DAMAGE_CHECKPOINT	31	0.66957	1.69672	0.0103093	0.191199
GO_MITOTIC_G2_M_TRANSITION_CHECKPOINT	29	0.676336	1.6926	0.00811359	0.196075
GO_MICROTUBULE_ORGANIZING_CENTER_LOCALIZATION	29	0.722909	1.69064	0.00782779	0.197441
GO_SIGNAL_TRANSDUCTION_INVOLVED_IN_CELL_CYCLE_CHECKPOINT	71	0.574982	1.68838	0.0181087	0.199064
GO_CELLULAR_RESPONSE_TO_STEROL_DEPLETION	15	0.676109	1.68613	0.004158	0.200737
GO_ATTACHMENT_OF_MITOTIC_SPINDLE_MICROTUBULES_TO_KINETOCHORE	15	0.767451	1.68567	0	0.198876
GO_CELL_DIVISION_SITE	58	0.58191	1.68185	0.0122951	0.20425
GO_CORTICAL_ACTIN_CYTOSKELETON_ORGANIZATION	38	0.64389	1.68069	0.0204082	0.204001
GO_MITOTIC_METAPHASE_PLATE_CONGRESSION	47	0.618145	1.67982	0.00592885	0.203135
GO_ER_TO_GOLGI_TRANSPORT_VESICLE_MEMBRANE	59	0.594494	1.67637	0.0178926	0.207603
GO_POSITIVE_REGULATION_OF_CYTOKINESIS	40	0.588782	1.6758	0.00877193	0.206248
GO_REGULATION_OF_CYTOKINESIS	89	0.566945	1.67555	0.0147059	0.204044
GO_HISTONE_EXCHANGE	41	0.608435	1.67451	0.0120724	0.203717
GO_CHROMOSOME_SEGREGATION	310	0.527466	1.67231	0.0104603	0.205732
GO_DNA_INTEGRITY_CHECKPOINT	153	0.576259	1.67188	0.0142276	0.204025
GO_SPINDLE_LOCALIZATION	49	0.606059	1.67121	0.0183673	0.202913
GO_POSITIVE_REGULATION_OF_MITOCHONDRIAL_OUTER_MEMBRANE_PERMEABILIZATION_INVOLVED_IN_APOPTOTIC_SIGNALING_PATHWAY	34	0.537524	1.67094	0.0262626	0.20089
GO_CHROMOSOME_ORGANIZATION_INVOLVED_IN_MEIOTIC_CELL_CYCLE	61	0.540193	1.67067	0.00896861	0.199029
GO_REGULATION_OF_DOUBLE_STRAND_BREAK_REPAIR	72	0.574573	1.66327	0.0121457	0.211175
GO_CONDENSED_NUCLEAR_CHROMOSOME	94	0.53221	1.66305	0.0125	0.209136
GO_POLYSOMAL_RIBOSOME	32	0.595372	1.66224	0.0204918	0.208438
GO_DNA_REPLICATION	263	0.556465	1.65063	0.0140845	0.231579
GO_3_5_DNA_HELICASE_ACTIVITY	18	0.740073	1.6456	0.00199203	0.240466
GO_DNA_STRAND_ELONGATION_INVOLVED_IN_DNA_REPLICATION	19	0.748492	1.64519	0.00200803	0.238768
GO_METAPHASE_ANAPHASE_TRANSITION_OF_CELL_CYCLE	60	0.613085	1.64391	0.024948	0.239024
GO_CLEAVAGE_FURROW	50	0.565846	1.64134	0.0142857	0.242439
GO_POSITIVE_REGULATION_OF_CELL_CYCLE_ARREST	80	0.530692	1.64104	0.0343434	0.240519
GO_DNA_POLYMERASE_COMPLEX	22	0.63789	1.63925	0.01875	0.242324
GO_CHROMOSOME_SEPARATION	91	0.561785	1.63481	0.0209205	0.250383
GO_NEGATIVE_REGULATION_OF_CELL_CYCLE_G2_M_PHASE_TRANSITION	102	0.494391	1.63205	0.0336634	0.254256
GO_ORGANELLE_FISSION	438	0.48529	1.62657	0.0191083	0.265363
GO_NUCLEAR_REPLICATION_FORK	41	0.620064	1.62646	0.0140281	0.26291
GO_DOUBLE_STRAND_BREAK_REPAIR	224	0.547484	1.62536	0.0164948	0.262868
GO_HOMOLOGOUS_RECOMBINATION	52	0.565887	1.62525	0.0150538	0.260522
GO_NEGATIVE_REGULATION_OF_METAPHASE_ANAPHASE_TRANSITION_OF_CELL_CYCLE	37	0.63561	1.62363	0.0204499	0.261904
GO_DNA_HELICASE_ACTIVITY	75	0.61346	1.62318	0.0182927	0.260399
GO_REGULATION_OF_EXIT_FROM_MITOSIS	17	0.630551	1.62278	0.0202429	0.258744
GO_MEIOTIC_CHROMOSOME_SEGREGATION	80	0.519935	1.6202	0.0159091	0.262532
GO_CHROMOCENTER	15	0.698212	1.61604	0.00992064	0.270566
GO_PROTEIN_LOCALIZATION_TO_CHROMOSOME_CENTROMERIC_REGION	20	0.689331	1.61447	0.011976	0.272053
GO_SISTER_CHROMATID_COHESION	54	0.579326	1.61446	0.018711	0.269528
GO_MITOTIC_SISTER_CHROMATID_COHESION	21	0.650825	1.61315	0.0198807	0.270521
GO_EXIT_FROM_MITOSIS	28	0.573192	1.61036	0.0160966	0.274835
GO_DNA_DEPENDENT_ATPASE_ACTIVITY	105	0.604244	1.6092	0.0247423	0.275192
GO_DNA_PACKAGING	161	0.511131	1.60761	0.0323232	0.276751
GO_REGULATION_OF_CHROMOSOME_SEPARATION	66	0.578889	1.60718	0.029661	0.275411
GO_MITOTIC_G1_S_TRANSITION_CHECKPOINT	63	0.553312	1.60674	0.0290456	0.274019
GO_PROTEIN_INSERTION_INTO_MITOCHONDRIAL_MEMBRANE_INVOLVED_IN_APOPTOTIC_SIGNALING_PATHWAY	30	0.547465	1.60572	0.0419162	0.273762
GO_COLLAGEN_CATABOLIC_PROCESS	45	0.623882	1.60552	0.0557851	0.27192
GO_NEGATIVE_REGULATION_OF_BEHAVIOR	16	0.599532	1.60542	0.0145631	0.269801
GO_PROTEIN_LOCALIZATION_TO_CHROMOSOME	74	0.570278	1.60491	0.0262097	0.268518
GO_BASE_EXCISION_REPAIR	40	0.564362	1.60453	0.0196464	0.267316
GO_TETRAHYDROFOLATE_METABOLIC_PROCESS	18	0.638529	1.60405	0.0176211	0.266176
GO_CYCLIN_DEPENDENT_PROTEIN_SERINE_THREONINE_KINASE_REGULATOR_ACTIVITY	48	0.549013	1.59816	0.0219124	0.278046
GO_REGULATION_OF_SISTER_CHROMATID_SEGREGATION	80	0.564532	1.59752	0.033543	0.277208
GO_CYTOKINESIS	156	0.500902	1.5951	0.0375783	0.280985
GO_DNA_PACKAGING_COMPLEX	23	0.62275	1.594	0.024	0.281411
GO_REGULATION_OF_DNA_RECOMBINATION	86	0.568081	1.59366	0.0306122	0.279903
GO_SERTOLI_CELL_DEVELOPMENT	15	0.588356	1.5925	0.0222717	0.28077
GO_MEIOTIC_CHROMOSOME_SEPARATION	22	0.625363	1.59151	0.0185567	0.280869
GO_MITOTIC_DNA_INTEGRITY_CHECKPOINT	104	0.549054	1.59109	0.034413	0.279593
GO_ESTABLISHMENT_OF_MITOTIC_SPINDLE_LOCALIZATION	35	0.628094	1.59089	0.036	0.277944
GO_MICROVILLUS_MEMBRANE	26	0.565438	1.59075	0.0238095	0.276141
GO_NEGATIVE_REGULATION_OF_HISTONE_ACETYLATION	16	0.610275	1.59068	0.029703	0.274154
GO_MEIOTIC_CELL_CYCLE_PROCESS	177	0.472505	1.58872	0.027027	0.276726
GO_TERTIARY_GRANULE_LUMEN	55	0.496005	1.58433	0.0541761	0.284755
GO_NUCLEOTIDE_SUGAR_BIOSYNTHETIC_PROCESS	22	0.59659	1.58326	0.0296443	0.285346
GO_G0_TO_G1_TRANSITION	45	0.568008	1.5825	0.028	0.285156
GO_HISTONE_KINASE_ACTIVITY	15	0.676934	1.5821	0.0254237	0.284065
GO_INTRINSIC_APOPTOTIC_SIGNALING_PATHWAY_BY_P53_CLASS_MEDIATOR	76	0.451245	1.58169	0.0444444	0.282881
GO_DESMOSOME	25	0.628738	1.5805	0.0577778	0.283639
GO_NEGATIVE_REGULATION_OF_CHROMOSOME_SEGREGATION	44	0.601071	1.57746	0.0384615	0.288686
GO_STEREOCILIUM_TIP	18	0.596501	1.57649	0.0165485	0.288942
GO_DNA_LIGATION	16	0.650059	1.57643	0.00782779	0.286973
GO_NUCLEOSOME_ASSEMBLY	71	0.564313	1.57263	0.031746	0.294296
GO_UDP_N_ACETYLGLUCOSAMINE_METABOLIC_PROCESS	16	0.629798	1.57225	0.0224949	0.293177
GO_LAMELLIPODIUM_MORPHOGENESIS	17	0.608889	1.57212	0.04375	0.291374
GO_REGULATION_OF_DNA_REPLICATION	108	0.523286	1.57172	0.0365854	0.290368
GO_NUCLEOTIDE_EXCISION_REPAIR_DNA_GAP_FILLING	23	0.601706	1.56942	0.0262664	0.294157
GO_INTERSTRAND_CROSS_LINK_REPAIR	49	0.607444	1.56924	0.0184426	0.29252
GO_SERTOLI_CELL_DIFFERENTIATION	21	0.509219	1.56437	0.0407674	0.302767
GO_ESTABLISHMENT_OF_SPINDLE_ORIENTATION	36	0.585623	1.56308	0.0351967	0.303964
GO_MITOTIC_RECOMBINATION	21	0.652018	1.56236	0.0230608	0.303705
GO_SPINDLE_MIDZONE	36	0.602796	1.56234	0.0455487	0.301736
GO_MITOTIC_G2_DNA_DAMAGE_CHECKPOINT	21	0.661103	1.56074	0.0389344	0.30362
GO_HISTONE_H3_K27_METHYLATION	16	0.637768	1.5556	0.022541	0.314232
GO_BLASTOCYST_GROWTH	20	0.615453	1.55493	0.0227273	0.313929
GO_CORTICAL_CYTOSKELETON_ORGANIZATION	59	0.521714	1.55228	0.0554415	0.318339
GO_FATTY_ACID_DERIVATIVE_BINDING	27	0.503588	1.54992	0.0505263	0.3223
GO_REGULATION_OF_DNA_DEPENDENT_DNA_REPLICATION	51	0.579019	1.5492	0.0425101	0.322062
GO_NEGATIVE_REGULATION_OF_DNA_REPAIR	29	0.622719	1.54798	0.0514851	0.323255
GO_SINGLE_STRANDED_VIRAL_RNA_REPLICATION_VIA_DOUBLE_STRANDED_DNA_INTERMEDIATE	18	0.671301	1.54763	0.0381526	0.322063
GO_4_IRON_4_SULFUR_CLUSTER_BINDING	41	0.547915	1.54602	0.048	0.324044
GO_DOSAGE_COMPENSATION	17	0.617158	1.54485	0.024948	0.324866
GO_SPINDLE_ORGANIZATION	174	0.516823	1.54474	0.0349794	0.323152
GO_POSITIVE_REGULATION_OF_MITOTIC_NUCLEAR_DIVISION	54	0.502889	1.54328	0.0457516	0.324973
GO_NEGATIVE_REGULATION_OF_CELL_CYCLE_PHASE_TRANSITION	262	0.441871	1.54254	0.064833	0.324786
GO_PROTEIN_LOCALIZATION_TO_KINETOCHORE	16	0.680832	1.53942	0.0262097	0.331001
GO_DNA_GEOMETRIC_CHANGE	113	0.547981	1.53885	0.0529532	0.330448
GO_REGULATION_OF_NUCLEAR_DIVISION	184	0.470865	1.53777	0.0513919	0.331318
GO_CELL_CYCLE_G1_S_PHASE_TRANSITION	306	0.459839	1.53557	0.068	0.335143
GO_DNA_CONFORMATION_CHANGE	273	0.498307	1.53414	0.0584677	0.33687
GO_ANAPHASE_PROMOTING_COMPLEX	22	0.560496	1.53192	0.0375783	0.34053
GO_DNA_DAMAGE_RESPONSE_DETECTION_OF_DNA_DAMAGE	37	0.532631	1.52863	0.0505837	0.347302
GO_SPECIFIC_GRANULE_LUMEN	62	0.480251	1.52795	0.0551724	0.346991
GO_REGULATION_OF_EXOSOMAL_SECRETION	15	0.528407	1.52689	0.0513834	0.347838
GO_MIDBODY	169	0.495751	1.52524	0.056338	0.350205
GO_NEGATIVE_REGULATION_OF_NUCLEAR_DIVISION	60	0.5133	1.52312	0.0654008	0.35378
GO_SINGLE_STRANDED_DNA_BINDING	107	0.492476	1.51951	0.0670732	0.361564
GO_POSITIVE_REGULATION_OF_PROTEIN_EXPORT_FROM_NUCLEUS	21	0.54901	1.51904	0.0741445	0.360826
GO_ANTIGEN_PROCESSING_AND_PRESENTATION_OF_ENDOGENOUS_PEPTIDE_ANTIGEN	17	0.657806	1.51787	0.0661323	0.36187
GO_REGULATION_OF_INTRINSIC_APOPTOTIC_SIGNALING_PATHWAY_IN_RESPONSE_TO_DNA_DAMAGE_BY_P53_CLASS_MEDIATOR	17	0.514819	1.51675	0.059501	0.36299
GO_MEIOTIC_CELL_CYCLE	236	0.44151	1.51389	0.0429864	0.368587
GO_MIDBODY_ABSCISSION	17	0.578079	1.50947	0.0216963	0.378844
GO_POSITIVE_REGULATION_OF_CELL_CYCLE_PHASE_TRANSITION	110	0.462519	1.50913	0.0587045	0.377716
GO_AZUROPHIL_GRANULE_LUMEN	88	0.442309	1.50717	0.095339	0.381076
GO_COPII_VESICLE_COAT	15	0.642269	1.50402	0.0173077	0.387982
GO_ESTABLISHMENT_OF_PROTEIN_LOCALIZATION_TO_MITOCHONDRIAL_MEMBRANE	47	0.454559	1.50387	0.0892857	0.386327
GO_REGULATION_OF_CELL_CYCLE_ARREST	104	0.436431	1.50362	0.0756646	0.384908
GO_MITOTIC_CYTOKINESIS	71	0.543963	1.50194	0.054878	0.387469
GO_NUCLEOSIDE_MONOPHOSPHATE_BIOSYNTHETIC_PROCESS	41	0.489793	1.49951	0.0728745	0.392418
GO_ATP_DEPENDENT_CHROMATIN_REMODELING	72	0.503787	1.49875	0.0668016	0.392467
GO_POSITIVE_REGULATION_OF_CELL_CYCLE_PROCESS	297	0.441427	1.49734	0.0748441	0.394531
GO_POSITIVE_REGULATION_OF_TELOMERE_CAPPING	17	0.582853	1.4942	0.0490196	0.401268
GO_MEMBRANE_LIPID_CATABOLIC_PROCESS	37	0.428388	1.49416	0.0782609	0.399285
GO_NUCLEOSIDE_SALVAGE	15	0.563434	1.49309	0.0646465	0.400328
GO_KERATINIZATION	223	0.429087	1.49201	0.0506329	0.401421
GO_TELOMERE_ORGANIZATION	143	0.494588	1.49001	0.0758483	0.40519
GO_DNA_SYNTHESIS_INVOLVED_IN_DNA_REPAIR	49	0.493044	1.48873	0.0828157	0.406667
GO_VIRAL_RNA_GENOME_REPLICATION	33	0.516653	1.48803	0.0796813	0.406607
GO_REGULATION_OF_CYCLIN_DEPENDENT_PROTEIN_KINASE_ACTIVITY	104	0.474046	1.48734	0.0603622	0.406341
GO_REGULATION_OF_CELL_CYCLE_G2_M_PHASE_TRANSITION	210	0.455653	1.48328	0.0823293	0.415479
GO_POSITIVE_REGULATION_OF_ESTABLISHMENT_OF_PROTEIN_LOCALIZATION_TO_MITOCHONDRION	58	0.472923	1.48034	0.114919	0.421931
GO_PEPTIDE_CROSS_LINKING	33	0.569358	1.47849	0.0774487	0.425286
GO_UBIQUITIN_LIKE_PROTEIN_CONJUGATING_ENZYME_ACTIVITY	43	0.458583	1.4782	0.0958333	0.423981
GO_PENTOSE_METABOLIC_PROCESS	15	0.516527	1.47764	0.0675991	0.423419
GO_DNA_RECOMBINATION	264	0.469885	1.47757	0.0669456	0.42158
GO_ANTIGEN_PROCESSING_AND_PRESENTATION_OF_PEPTIDE_OR_POLYSACCHARIDE_ANTIGEN_VIA_MHC_CLASS_II	100	0.493781	1.47724	0.113131	0.420556
GO_NEGATIVE_REGULATION_OF_CELL_DIVISION	18	0.615233	1.47711	0.0735294	0.418864
GO_CORNIFICATION	112	0.474166	1.4748	0.0892388	0.423352
GO_POSITIVE_REGULATION_OF_MITOTIC_CELL_CYCLE	165	0.44054	1.47014	0.0807453	0.434637
GO_NEGATIVE_REGULATION_OF_CELL_CYCLE_PROCESS	349	0.412184	1.4671	0.10495	0.441764
GO_MEIOSIS_I_CELL_CYCLE_PROCESS	112	0.453464	1.46473	0.0666667	0.446478
GO_MITOTIC_SPINDLE	127	0.506415	1.46468	0.0946502	0.444499
GO_POSITIVE_REGULATION_OF_LYMPHOCYTE_APOPTOTIC_PROCESS	18	0.612655	1.46452	0.0811404	0.442856
GO_NUCLEAR_CHROMOSOME_TELOMERIC_REGION	97	0.508641	1.46333	0.105159	0.4443
GO_CYTOSKELETON_DEPENDENT_CYTOKINESIS	85	0.492345	1.4631	0.0867769	0.442969
GO_SPECIFIC_GRANULE	158	0.478747	1.46192	0.120172	0.444297
GO_MITOTIC_CYTOKINETIC_PROCESS	23	0.528331	1.46147	0.0632184	0.443587
GO_REGULATION_OF_UBIQUITIN_PROTEIN_LIGASE_ACTIVITY	24	0.535297	1.46096	0.101266	0.442987
GO_REGULATION_OF_SISTER_CHROMATID_COHESION	18	0.591388	1.46018	0.0843137	0.443298
GO_REGULATION_OF_MICROGLIAL_CELL_ACTIVATION	19	0.685414	1.45979	0.0892116	0.442356
GO_TRANSLATION_REPRESSOR_ACTIVITY	26	0.538776	1.45287	0.0728051	0.461123
GO_FILOPODIUM_TIP	17	0.542924	1.45269	0.078125	0.459605
GO_MAMMARY_GLAND_EPITHELIAL_CELL_PROLIFERATION	28	0.553616	1.44977	0.109756	0.466581
GO_NEGATIVE_REGULATION_OF_MITOTIC_CELL_CYCLE	334	0.417458	1.44879	0.130604	0.467423
GO_NEGATIVE_REGULATION_OF_DNA_RECOMBINATION	28	0.589926	1.44847	0.0821643	0.466279
GO_HEPATOCYTE_GROWTH_FACTOR_RECEPTOR_SIGNALING_PATHWAY	16	0.576691	1.44686	0.102515	0.469009
GO_NEGATIVE_REGULATION_OF_CHROMOSOME_ORGANIZATION	131	0.474647	1.44578	0.0851927	0.470277
GO_CHROMOSOME_TELOMERIC_REGION	134	0.477071	1.44521	0.104418	0.469792
GO_DNA_DEPENDENT_DNA_REPLICATION_MAINTENANCE_OF_FIDELITY	40	0.589915	1.44518	0.0940695	0.467791
GO_ENTRY_OF_BACTERIUM_INTO_HOST_CELL	15	0.63696	1.4444	0.0829959	0.46799
GO_PHAGOPHORE_ASSEMBLY_SITE	29	0.558473	1.4433	0.0581162	0.469325
GO_PURINE_NUCLEOSIDE_MONOPHOSPHATE_BIOSYNTHETIC_PROCESS	20	0.517907	1.44233	0.0889328	0.470185
GO_5_3_EXONUCLEASE_ACTIVITY	17	0.617338	1.44162	0.060241	0.470265
GO_EUKARYOTIC_48S_PREINITIATION_COMPLEX	15	0.608871	1.43553	0.0518234	0.486505
GO_COPII_COATED_ER_TO_GOLGI_TRANSPORT_VESICLE	91	0.469205	1.43305	0.119192	0.491919
GO_ANAPHASE_PROMOTING_COMPLEX_DEPENDENT_CATABOLIC_PROCESS	82	0.455712	1.43103	0.148893	0.495946
GO_FOLIC_ACID_CONTAINING_COMPOUND_METABOLIC_PROCESS	27	0.526942	1.43069	0.0864979	0.494873
GO_COPII_COATED_VESICLE_CARGO_LOADING	15	0.605668	1.42982	0.0496183	0.495386
GO_OOCYTE_MATURATION	24	0.537073	1.42925	0.101031	0.494974
GO_CD40_SIGNALING_PATHWAY	15	0.669248	1.42905	0.112676	0.49356
GO_FORMATION_OF_CYTOPLASMIC_TRANSLATION_INITIATION_COMPLEX	16	0.598005	1.42688	0.0697674	0.497964
GO_HETEROCHROMATIN	71	0.476209	1.42552	0.131579	0.500136
GO_POSITIVE_REGULATION_OF_CELL_CYCLE_G2_M_PHASE_TRANSITION	30	0.507768	1.4236	0.0893971	0.503881
GO_MITOCHONDRIA_ASSOCIATED_ENDOPLASMIC_RETICULUM_MEMBRANE	16	0.570601	1.41996	0.10609	0.513231
GO_MHC_PROTEIN_COMPLEX	23	0.759429	1.41964	0.121094	0.512205
GO_PLASMA_MEMBRANE_TUBULATION	18	0.497382	1.41917	0.11359	0.511522
GO_CADHERIN_BINDING	308	0.426697	1.4181	0.170254	0.512548
GO_RESPONSE_TO_GAMMA_RADIATION	53	0.494761	1.41699	0.131524	0.513847
GO_ANTIMICROBIAL_HUMORAL_RESPONSE	125	0.442246	1.41596	0.0653951	0.514862
GO_NUCLEAR_UBIQUITIN_LIGASE_COMPLEX	42	0.485151	1.41432	0.143426	0.517966
GO_TRANSLESION_SYNTHESIS	39	0.500236	1.41096	0.136	0.52633
GO_MRNA_TRANSCRIPTION	17	0.529406	1.41021	0.141153	0.5266
GO_POSITIVE_REGULATION_OF_AUTOPHAGY_OF_MITOCHONDRION	19	0.583209	1.4099	0.0928854	0.525393
GO_SIGNAL_TRANSDUCTION_IN_RESPONSE_TO_DNA_DAMAGE	127	0.453174	1.40981	0.154618	0.523601
GO_POSITIVE_REGULATION_OF_DOUBLE_STRAND_BREAK_REPAIR	28	0.513788	1.40915	0.121901	0.523393
GO_REGULATION_OF_CELL_CYCLE_PHASE_TRANSITION	475	0.405297	1.40674	0.152475	0.528654
GO_PROTEIN_HETEROOLIGOMERIZATION	22	0.456931	1.40554	0.090703	0.530328
GO_MYOSIN_V_BINDING	17	0.520053	1.40537	0.120729	0.528873
GO_DOPAMINE_RECEPTOR_BINDING	17	0.527371	1.40316	0.119748	0.533515
GO_GTP_RHO_BINDING	20	0.562452	1.40255	0.114786	0.533283
GO_ACYL_COA_BINDING	22	0.469676	1.40132	0.124	0.535264
GO_POSTREPLICATION_REPAIR	49	0.495225	1.39779	0.15	0.544076
GO_NF_KAPPAB_BINDING	31	0.473145	1.39497	0.139847	0.550544
GO_POSITIVE_REGULATION_OF_CELL_CYCLE	389	0.39681	1.39247	0.13125	0.556672
GO_ANTIGEN_PROCESSING_AND_PRESENTATION_OF_ENDOGENOUS_ANTIGEN	24	0.606675	1.39215	0.138833	0.55551
GO_CADHERIN_BINDING_INVOLVED_IN_CELL_CELL_ADHESION	18	0.577597	1.3913	0.156	0.556204
GO_CERAMIDE_BINDING	15	0.58673	1.3906	0.137295	0.556243
GO_SIGNAL_TRANSDUCTION_BY_P53_CLASS_MEDIATOR	260	0.419836	1.39017	0.171937	0.555496
GO_ORGANELLE_INHERITANCE	15	0.51724	1.38437	0.100616	0.571245
GO_AZUROPHIL_GRANULE	150	0.393024	1.38261	0.183932	0.574445
GO_EXOGENOUS_PROTEIN_BINDING	71	0.502704	1.38234	0.155925	0.573186
GO_FUCOSYLATION	16	0.56384	1.38227	0.132883	0.571284
GO_NEGATIVE_REGULATION_OF_DNA_DEPENDENT_DNA_REPLICATION	18	0.603067	1.38105	0.133333	0.573019
GO_CATALYTIC_ACTIVITY_ACTING_ON_A_GLYCOPROTEIN	22	0.545013	1.37878	0.176596	0.578317
GO_POSITIVE_REGULATION_OF_DNA_TEMPLATED_TRANSCRIPTION_ELONGATION	26	0.569102	1.37572	0.0976096	0.586181
GO_NEGATIVE_REGULATION_OF_DNA_REPLICATION	32	0.50741	1.37475	0.151822	0.587088
GO_NUCLEOSOME_ORGANIZATION	108	0.446348	1.37428	0.146881	0.58646
GO_REGULATION_OF_MITOCHONDRIAL_OUTER_MEMBRANE_PERMEABILIZATION_INVOLVED_IN_APOPTOTIC_SIGNALING_PATHWAY	44	0.420259	1.37385	0.142	0.585727
GO_TERTIARY_GRANULE	160	0.460058	1.37367	0.18259	0.584146
GO_INTERLEUKIN_17_PRODUCTION	43	0.51308	1.37281	0.153535	0.584629
GO_REGULATION_OF_DNA_REPAIR	115	0.448723	1.3715	0.166324	0.586606
GO_CELL_CYCLE_G2_M_PHASE_TRANSITION	264	0.418847	1.37014	0.179641	0.588967
GO_ACTIN_DEPENDENT_ATPASE_ACTIVITY	24	0.49495	1.37014	0.12527	0.586893
GO_PTERIDINE_CONTAINING_COMPOUND_METABOLIC_PROCESS	33	0.475743	1.37012	0.12	0.584882
GO_FICOLIN_1_RICH_GRANULE	124	0.423652	1.36972	0.191235	0.584039
GO_ZYMOGEN_GRANULE	15	0.492582	1.36897	0.148515	0.584294
GO_ENGULFMENT_OF_APOPTOTIC_CELL	17	0.557394	1.36782	0.131915	0.58586
GO_POSITIVE_REGULATION_OF_DNA_RECOMBINATION	38	0.495328	1.36756	0.141129	0.5846
GO_PERICENTRIC_HETEROCHROMATIN	18	0.562516	1.36667	0.166667	0.585313
GO_NUCLEAR_HETEROCHROMATIN	29	0.536943	1.36292	0.140244	0.594948
GO_PODOSOME_ASSEMBLY	19	0.557146	1.3628	0.148148	0.593217
GO_FORMATION_OF_EXTRACHROMOSOMAL_CIRCULAR_DNA	15	0.601807	1.36266	0.112051	0.591853
GO_FOUR_WAY_JUNCTION_DNA_BINDING	17	0.595743	1.36178	0.115702	0.59255
GO_REGULATORY_T_CELL_DIFFERENTIATION	34	0.626572	1.36046	0.181275	0.594549
GO_REGULATION_OF_TELOMERE_CAPPING	26	0.529164	1.36009	0.142023	0.593631
GO_EXTRACELLULAR_MATRIX_DISASSEMBLY	78	0.448645	1.3589	0.167382	0.595286
GO_NEGATIVE_REGULATION_OF_TYPE_I_INTERFERON_MEDIATED_SIGNALING_PATHWAY	15	0.535922	1.35776	0.140816	0.59691
GO_KERATINOCYTE_DIFFERENTIATION	301	0.374719	1.35736	0.119469	0.59623
GO_POSITIVE_REGULATION_OF_T_HELPER_1_TYPE_IMMUNE_RESPONSE	20	0.652919	1.35642	0.166324	0.597219
GO_LATERAL_PLASMA_MEMBRANE	64	0.427434	1.35635	0.135776	0.595412
GO_DNA_DAMAGE_RESPONSE_SIGNAL_TRANSDUCTION_BY_P53_CLASS_MEDIATOR	103	0.439827	1.35516	0.199601	0.597237
GO_POSITIVE_REGULATION_OF_GENE_EXPRESSION_EPIGENETIC	48	0.486579	1.35448	0.199226	0.597284
GO_ACTIVATION_OF_JUN_KINASE_ACTIVITY	37	0.485003	1.35338	0.178499	0.59876
GO_MANNOSIDASE_ACTIVITY	15	0.594071	1.35294	0.157588	0.598017
GO_SITE_OF_DNA_DAMAGE	70	0.48907	1.35276	0.185771	0.59659
GO_DNA_SECONDARY_STRUCTURE_BINDING	33	0.499762	1.35212	0.14553	0.596532
GO_CYTOPLASMIC_TRANSLATIONAL_INITIATION	34	0.485758	1.35016	0.177388	0.600619
GO_REGULATION_OF_MAMMARY_GLAND_EPITHELIAL_CELL_PROLIFERATION	17	0.530153	1.348	0.155102	0.605396
GO_POSITIVE_REGULATION_OF_PEPTIDYL_THREONINE_PHOSPHORYLATION	30	0.457322	1.34665	0.161359	0.607539
GO_POSITIVE_REGULATION_OF_TORC1_SIGNALING	15	0.521943	1.3463	0.142285	0.606621
GO_NEGATIVE_REGULATION_OF_DNA_TEMPLATED_TRANSCRIPTION_ELONGATION	15	0.49306	1.34364	0.149888	0.61263
GO_GLUCOSAMINE_CONTAINING_COMPOUND_METABOLIC_PROCESS	24	0.499536	1.34228	0.141975	0.615182
GO_REGULATION_OF_ESTABLISHMENT_OF_PROTEIN_LOCALIZATION_TO_MITOCHONDRION	71	0.398396	1.33971	0.186373	0.621321
GO_REGULATION_OF_VIRAL_INDUCED_CYTOPLASMIC_PATTERN_RECOGNITION_RECEPTOR_SIGNALING_PATHWAY	19	0.518901	1.33839	0.173913	0.623332
GO_REGULATION_OF_T_HELPER_1_TYPE_IMMUNE_RESPONSE	27	0.639283	1.33814	0.19877	0.622104
GO_SMALL_SUBUNIT_PROCESSOME	34	0.514364	1.33705	0.160542	0.623544
GO_POSITIVE_REGULATION_OF_VASCULAR_ENDOTHELIAL_GROWTH_FACTOR_PRODUCTION	28	0.526517	1.3358	0.167756	0.625483
GO_O_GLYCAN_PROCESSING	59	0.437159	1.33558	0.13253	0.624177
GO_RESPONSE_TO_X_RAY	31	0.513769	1.33531	0.184959	0.623033
GO_CHROMATIN_SILENCING	41	0.457581	1.33459	0.14135	0.62339
GO_NUCLEOBASE_CONTAINING_SMALL_MOLECULE_INTERCONVERSION	26	0.447568	1.3336	0.136821	0.62443
GO_POSITIVE_REGULATION_OF_T_HELPER_CELL_DIFFERENTIATION	22	0.610038	1.33352	0.199211	0.622745
GO_POSITIVE_REGULATION_OF_TOR_SIGNALING	41	0.416436	1.33136	0.150515	0.627464
GO_INTESTINAL_EPITHELIAL_CELL_DEVELOPMENT	15	0.570009	1.32941	0.179704	0.631917
GO_CELLULAR_COMPONENT_MAINTENANCE	57	0.418847	1.32874	0.16269	0.631955
GO_CELL_CORTEX_REGION	42	0.433457	1.32872	0.159236	0.630063
GO_REPLISOME	26	0.497481	1.32864	0.178295	0.628331
GO_EPIDERMAL_CELL_DIFFERENTIATION	358	0.35774	1.32794	0.124153	0.628523
GO_EXODEOXYRIBONUCLEASE_ACTIVITY	22	0.489076	1.32709	0.159236	0.629284
GO_POSITIVE_REGULATION_OF_PROTEIN_LOCALIZATION_TO_NUCLEUS	80	0.389022	1.32664	0.206452	0.628692
GO_POSITIVE_REGULATION_OF_NUCLEAR_DIVISION	68	0.406129	1.32425	0.133949	0.634332
GO_DAMAGED_DNA_BINDING	65	0.47057	1.32385	0.217304	0.633661
GO_NUCLEAR_IMPORT_SIGNAL_RECEPTOR_ACTIVITY	19	0.513347	1.32297	0.192079	0.634592
GO_SPINDLE_POLE	160	0.447441	1.31942	0.214724	0.644109
GO_INTRA_S_DNA_DAMAGE_CHECKPOINT	15	0.542985	1.31598	0.182752	0.653135
GO_PROTEIN_LOCALIZATION_TO_ENDOSOME	23	0.488522	1.31566	0.21875	0.652218
GO_ANTIGEN_PROCESSING_AND_PRESENTATION_OF_PEPTIDE_ANTIGEN	190	0.408369	1.31536	0.242485	0.651205
GO_REPLICATION_FORK_PROCESSING	31	0.547872	1.31478	0.185185	0.651097
GO_POSITIVE_REGULATION_OF_MITOCHONDRION_ORGANIZATION	116	0.381745	1.31469	0.206693	0.649461
GO_RESPONSE_TO_IONIZING_RADIATION	136	0.433411	1.31442	0.238095	0.648456
GO_EPHRIN_RECEPTOR_BINDING	27	0.485571	1.31431	0.206316	0.646871
GO_PROTEIN_K11_LINKED_UBIQUITINATION	27	0.466068	1.31159	0.186667	0.653512
GO_NADPH_REGENERATION	17	0.488991	1.31099	0.206	0.653481
GO_INTRINSIC_APOPTOTIC_SIGNALING_PATHWAY	280	0.356811	1.31097	0.198381	0.651625
GO_POSITIVE_REGULATION_OF_UBIQUITIN_PROTEIN_TRANSFERASE_ACTIVITY	35	0.430634	1.31079	0.19	0.650254
GO_FLEMMING_BODY	31	0.488136	1.3106	0.199588	0.649098
GO_POSITIVE_REGULATION_OF_INTERLEUKIN_17_PRODUCTION	18	0.612339	1.31011	0.22379	0.648678
GO_DIOL_BIOSYNTHETIC_PROCESS	22	0.498582	1.30968	0.172199	0.648021
GO_CHROMATIN_REMODELING	182	0.421163	1.30815	0.198758	0.650827
GO_SOMATIC_DIVERSIFICATION_OF_IMMUNE_RECEPTORS_VIA_SOMATIC_MUTATION	17	0.52663	1.30724	0.213462	0.651728
GO_CHEMOKINE_ACTIVITY	47	0.558674	1.30632	0.256048	0.652787
GO_POSITIVE_REGULATION_OF_CD4_POSITIVE_ALPHA_BETA_T_CELL_DIFFERENTIATION	30	0.598976	1.30621	0.232283	0.651259
GO_PROTEIN_DNA_COMPLEX_SUBUNIT_ORGANIZATION	206	0.409413	1.30519	0.218254	0.652525
GO_LIPOXYGENASE_PATHWAY	16	0.525574	1.3044	0.169165	0.65306
GO_EPITHELIAL_CELL_MATURATION	15	0.498977	1.30384	0.142222	0.652999
GO_PROTEIN_KINASE_COMPLEX	102	0.437279	1.30383	0.204301	0.651194
GO_BLOC_COMPLEX	19	0.504481	1.30339	0.187023	0.650674
GO_MITOCHONDRIAL_OUTER_MEMBRANE_PERMEABILIZATION	53	0.389622	1.30254	0.190283	0.651297
GO_DEOXYRIBONUCLEOTIDE_METABOLIC_PROCESS	34	0.424171	1.30252	0.194499	0.649538
GO_INTRINSIC_APOPTOTIC_SIGNALING_PATHWAY_IN_RESPONSE_TO_OXIDATIVE_STRESS	42	0.425703	1.30249	0.209776	0.647827
GO_REGULATION_OF_PODOSOME_ASSEMBLY	15	0.51898	1.30246	0.19604	0.646126
GO_SEX_CHROMOSOME	25	0.493343	1.30192	0.20935	0.645928
GO_CALCIUM_DEPENDENT_PROTEIN_BINDING	78	0.384552	1.30018	0.158696	0.649454
GO_ERROR_FREE_TRANSLESION_SYNTHESIS	21	0.50154	1.29929	0.195358	0.650451
GO_CHROMATIN_ASSEMBLY_OR_DISASSEMBLY	143	0.425256	1.29782	0.24498	0.653231
GO_T_HELPER_1_CELL_DIFFERENTIATION	19	0.562593	1.29712	0.225296	0.653485
GO_RESPONSE_TO_INTERLEUKIN_4	35	0.489807	1.29568	0.216867	0.65624
GO_MEMBRANE_DISASSEMBLY	16	0.546282	1.29537	0.221074	0.655465
GO_EUKARYOTIC_TRANSLATION_INITIATION_FACTOR_3_COMPLEX	17	0.529836	1.29337	0.180077	0.659893
GO_POSITIVE_REGULATION_OF_MRNA_PROCESSING	33	0.404718	1.29196	0.213508	0.662302
GO_PHOSPHATIDYLINOSITOL_5_PHOSPHATE_BINDING	17	0.487118	1.29108	0.176972	0.663145
GO_FEMALE_GAMETE_GENERATION	131	0.385374	1.29036	0.131944	0.663558
GO_SPINDLE	351	0.419155	1.28997	0.229339	0.662943
GO_REGULATION_OF_AUTOPHAGY_OF_MITOCHONDRION	40	0.481611	1.28956	0.234469	0.662332
GO_MULTIVESICULAR_BODY_SORTING_PATHWAY	39	0.438091	1.28947	0.236581	0.660821
GO_LUMENAL_SIDE_OF_ENDOPLASMIC_RETICULUM_MEMBRANE	27	0.549012	1.28938	0.264	0.659339
GO_P53_BINDING	64	0.427525	1.28788	0.214876	0.661957
GO_NEGATIVE_REGULATION_OF_RESPONSE_TO_DNA_DAMAGE_STIMULUS	74	0.438365	1.28669	0.244048	0.663748
GO_GOLGI_ASSOCIATED_VESICLE_MEMBRANE	107	0.37204	1.28529	0.219758	0.666232
GO_HELICASE_ACTIVITY	156	0.449182	1.28501	0.25625	0.665269
GO_MYELOID_DENDRITIC_CELL_DIFFERENTIATION	18	0.560694	1.28277	0.194332	0.670061
GO_LAMININ_BINDING	28	0.499725	1.28262	0.223762	0.668769
GO_SPECIFIC_GRANULE_MEMBRANE	89	0.47432	1.28075	0.259875	0.672587
GO_POSITIVE_REGULATION_OF_MUSCLE_CELL_APOPTOTIC_PROCESS	35	0.39547	1.28062	0.157895	0.671205
GO_CATALYTIC_ACTIVITY_ACTING_ON_DNA	200	0.419681	1.27869	0.258197	0.675244
GO_DIOL_METABOLIC_PROCESS	25	0.47628	1.27841	0.213552	0.674371
GO_ESC_E_Z_COMPLEX	15	0.528941	1.27613	0.199179	0.67927
GO_GLUTAMINE_METABOLIC_PROCESS	21	0.461596	1.27586	0.194748	0.678356
GO_NEGATIVE_REGULATION_OF_INTERLEUKIN_17_PRODUCTION	21	0.492559	1.27494	0.212476	0.679467
GO_90S_PRERIBOSOME	26	0.491486	1.2745	0.237094	0.678928
GO_REGULATION_OF_MITOCHONDRIAL_MEMBRANE_PERMEABILITY_INVOLVED_IN_APOPTOTIC_PROCESS	63	0.360243	1.27398	0.221074	0.678758
GO_REGULATION_OF_SPINDLE_ORGANIZATION	38	0.443574	1.27238	0.248497	0.681771
GO_PROTEIN_TYROSINE_KINASE_ACTIVATOR_ACTIVITY	17	0.466901	1.27225	0.193617	0.680383
GO_METALLOAMINOPEPTIDASE_ACTIVITY	21	0.451698	1.2708	0.203285	0.682948
GO_RESPONSE_TO_INTERLEUKIN_12	50	0.42302	1.27013	0.268499	0.683314
GO_REGULATION_OF_CENTROSOME_CYCLE	58	0.46188	1.26937	0.252083	0.683887
GO_ANTIGEN_PROCESSING_AND_PRESENTATION	228	0.405952	1.26925	0.292	0.682552
GO_NEGATIVE_REGULATION_OF_PROTEIN_ACETYLATION	23	0.426315	1.2689	0.217069	0.681855
GO_CELLULAR_RESPONSE_TO_IONIZING_RADIATION	66	0.427577	1.26763	0.252941	0.683857
GO_ERROR_PRONE_TRANSLESION_SYNTHESIS	21	0.510233	1.26724	0.203252	0.683224
GO_HISTONE_MONOUBIQUITINATION	29	0.496139	1.26623	0.237425	0.684523
GO_MEMBRANE_FISSION	15	0.507972	1.26378	0.221987	0.68999
GO_NUCLEOCYTOPLASMIC_CARRIER_ACTIVITY	29	0.47297	1.26322	0.246124	0.689844
GO_B_CELL_APOPTOTIC_PROCESS	26	0.492308	1.26321	0.260606	0.688154
GO_PYRIMIDINE_NUCLEOBASE_METABOLIC_PROCESS	16	0.495717	1.26308	0.221491	0.686858
GO_N_ACETYLGLUCOSAMINE_METABOLIC_PROCESS	17	0.489671	1.26299	0.217565	0.685388
GO_CHROMATIN_ORGANIZATION_INVOLVED_IN_REGULATION_OF_TRANSCRIPTION	89	0.419752	1.26274	0.259259	0.684428
GO_MALE_MEIOSIS_I	23	0.437433	1.25708	0.165899	0.699073
GO_ANTIMICROBIAL_HUMORAL_IMMUNE_RESPONSE_MEDIATED_BY_ANTIMICROBIAL_PEPTIDE	66	0.411437	1.25669	0.186111	0.698465
GO_CELL_JUNCTION_MAINTENANCE	30	0.43703	1.25592	0.199571	0.699035
GO_NEGATIVE_REGULATION_OF_INTRINSIC_APOPTOTIC_SIGNALING_PATHWAY	95	0.34091	1.2546	0.233871	0.701194
GO_SYNAPTONEMAL_STRUCTURE	40	0.40778	1.25364	0.170022	0.702356
GO_HISTONE_H2A_UBIQUITINATION	26	0.50353	1.25295	0.23	0.702637
GO_OVULATION	21	0.52822	1.25182	0.238901	0.704395
GO_NEGATIVE_REGULATION_OF_KIDNEY_DEVELOPMENT	17	0.491101	1.25149	0.205063	0.703663
GO_REGULATION_OF_SIGNAL_TRANSDUCTION_BY_P53_CLASS_MEDIATOR	174	0.386474	1.25068	0.269076	0.704298
GO_INTERACTION_WITH_HOST	208	0.380544	1.24909	0.250526	0.707275
GO_METAL_CLUSTER_BINDING	65	0.391788	1.24867	0.245436	0.706847
GO_DNA_DOUBLE_STRAND_BREAK_PROCESSING	24	0.495242	1.24865	0.271605	0.705218
GO_POSITIVE_REGULATION_OF_FIBROBLAST_PROLIFERATION	50	0.436426	1.2461	0.227181	0.711021
GO_TRANSLATION_REPRESSOR_ACTIVITY_MRNA_REGULATORY_ELEMENT_BINDING	16	0.534107	1.24586	0.252654	0.710093
GO_MOVEMENT_IN_HOST_ENVIRONMENT	165	0.392361	1.24469	0.273885	0.711939
GO_LYSOSOMAL_TRANSPORT	108	0.396925	1.2444	0.282474	0.711111
GO_ENDOPLASMIC_RETICULUM_GOLGI_INTERMEDIATE_COMPARTMENT_MEMBRANE	72	0.369551	1.24392	0.257796	0.71089
GO_PHOSPHATIDYLSERINE_METABOLIC_PROCESS	33	0.416083	1.24335	0.227586	0.710883
GO_NEGATIVE_REGULATION_OF_T_CELL_PROLIFERATION	61	0.459832	1.2429	0.282051	0.710561
GO_REGULATION_OF_CELL_CYCLE_CHECKPOINT	32	0.462306	1.24211	0.273834	0.711383
GO_POSITIVE_REGULATION_OF_STRIATED_MUSCLE_CELL_APOPTOTIC_PROCESS	18	0.438813	1.24192	0.206827	0.710304
GO_PHAGOPHORE_ASSEMBLY_SITE_MEMBRANE	15	0.543069	1.24124	0.200772	0.710647
GO_ENTRY_INTO_HOST	143	0.403816	1.24075	0.284501	0.710327
GO_TRANSLATION_PREINITIATION_COMPLEX	18	0.506933	1.24041	0.226667	0.709622
GO_REGULATION_OF_DNA_DAMAGE_CHECKPOINT	17	0.51629	1.24016	0.290514	0.708657
GO_TERTIARY_GRANULE_MEMBRANE	71	0.493537	1.23977	0.303393	0.708202
GO_ENDOLYSOSOME	20	0.460235	1.23954	0.266958	0.70722
GO_SITE_OF_DOUBLE_STRAND_BREAK	52	0.450701	1.23948	0.293069	0.705759
GO_REGULATION_OF_DNA_TEMPLATED_TRANSCRIPTION_ELONGATION	46	0.44425	1.23928	0.288032	0.704685
GO_MICROFILAMENT_MOTOR_ACTIVITY	29	0.426271	1.23887	0.221393	0.704153
GO_NEGATIVE_REGULATION_OF_PEPTIDYL_LYSINE_ACETYLATION	19	0.436975	1.23863	0.238384	0.703272
GO_POSTSYNAPTIC_CYTOSOL	18	0.474829	1.23807	0.232906	0.703209
GO_HOMOLOGOUS_CHROMOSOME_PAIRING_AT_MEIOSIS	42	0.39467	1.23769	0.195062	0.702751
GO_CERAMIDE_CATABOLIC_PROCESS	21	0.417375	1.2365	0.221505	0.704473
GO_REGULATION_OF_PROTEIN_EXPORT_FROM_NUCLEUS	41	0.422912	1.23526	0.28876	0.706473
GO_RNA_DEPENDENT_DNA_BIOSYNTHETIC_PROCESS	68	0.403497	1.23523	0.319688	0.704954
GO_POSITIVE_REGULATION_OF_T_CELL_MEDIATED_CYTOTOXICITY	26	0.543728	1.23457	0.255624	0.705252
GO_OOCYTE_DIFFERENTIATION	48	0.397108	1.23308	0.190583	0.707957
GO_RETROMER_COMPLEX	20	0.508068	1.23239	0.257426	0.708522
GO_DNA_POLYMERASE_ACTIVITY	30	0.448439	1.23218	0.261603	0.707506
GO_ENDOSOME_TO_LYSOSOME_TRANSPORT	52	0.423437	1.23196	0.298354	0.706536
GO_ODORANT_BINDING	101	0.398211	1.23108	0.2	0.707353
GO_UTERUS_DEVELOPMENT	21	0.503504	1.2303	0.257757	0.70793
GO_REGULATION_OF_CELL_DIVISION	167	0.39032	1.22973	0.240535	0.708129
GO_REGULATION_OF_PEPTIDYL_THREONINE_PHOSPHORYLATION	48	0.391615	1.22932	0.275362	0.707647
GO_TELOMERE_MAINTENANCE_VIA_TELOMERE_LENGTHENING	78	0.39833	1.2288	0.302419	0.707506
GO_TRANSLATION_REGULATOR_ACTIVITY	134	0.341266	1.22826	0.3	0.707485
GO_MISMATCH_REPAIR	38	0.421272	1.22811	0.285132	0.70629
GO_T_CELL_MEDIATED_CYTOTOXICITY	42	0.522351	1.2276	0.278226	0.706261
GO_DNA_BIOSYNTHETIC_PROCESS	182	0.352213	1.22708	0.296	0.706102
GO_NEGATIVE_REGULATION_OF_INTERFERON_GAMMA_PRODUCTION	36	0.463964	1.22569	0.257019	0.70836
GO_HOMOLOGOUS_CHROMOSOME_SEGREGATION	53	0.385546	1.22565	0.19	0.7069
GO_REGULATION_OF_DOUBLE_STRAND_BREAK_REPAIR_VIA_NONHOMOLOGOUS_END_JOINING	21	0.492262	1.22554	0.299595	0.705665
GO_HISTONE_H2A_MONOUBIQUITINATION	17	0.517818	1.22527	0.255906	0.70482
GO_POSITIVE_REGULATION_OF_TELOMERE_MAINTENANCE	50	0.412699	1.22033	0.312621	0.717715
GO_POSTSYNAPTIC_SPECIALIZATION_INTRACELLULAR_COMPONENT	21	0.431409	1.21873	0.24714	0.720858
GO_T_CELL_MEDIATED_IMMUNITY	102	0.453157	1.2187	0.288577	0.719381
GO_REGULATION_OF_CYSTEINE_TYPE_ENDOPEPTIDASE_ACTIVITY_INVOLVED_IN_APOPTOTIC_SIGNALING_PATHWAY	17	0.501042	1.21656	0.285425	0.724204
GO_PYRIMIDINE_NUCLEOSIDE_MONOPHOSPHATE_METABOLIC_PROCESS	15	0.463152	1.21407	0.273101	0.729762
GO_PHAGOCYTIC_VESICLE_MEMBRANE	75	0.407852	1.21342	0.308333	0.73
GO_PROTEIN_C_TERMINUS_BINDING	186	0.354495	1.21245	0.286013	0.731111
GO_INTRINSIC_APOPTOTIC_SIGNALING_PATHWAY_IN_RESPONSE_TO_DNA_DAMAGE	101	0.372479	1.21231	0.292247	0.729922
GO_MICROTUBULE_END	33	0.460395	1.21208	0.279022	0.729027
GO_LUMENAL_SIDE_OF_MEMBRANE	33	0.45587	1.21189	0.317814	0.727922
GO_PRERIBOSOME	72	0.453871	1.21157	0.309198	0.727244
GO_SOMATIC_DIVERSIFICATION_OF_IMMUNOGLOBULINS	60	0.451612	1.21155	0.307071	0.725749
GO_REGULATION_OF_TELOMERE_MAINTENANCE_VIA_TELOMERE_LENGTHENING	59	0.419504	1.21141	0.329389	0.724601
GO_POSITIVE_REGULATION_OF_TELOMERE_MAINTENANCE_VIA_TELOMERE_LENGTHENING	37	0.438515	1.21046	0.30814	0.725709
GO_FOLIC_ACID_METABOLIC_PROCESS	19	0.47565	1.20936	0.236443	0.72719
GO_KINESIN_COMPLEX	50	0.434457	1.20922	0.264463	0.726056
GO_NUCLEOBASE_BIOSYNTHETIC_PROCESS	18	0.472054	1.20768	0.300613	0.728998
GO_POSITIVE_REGULATION_OF_T_CELL_MEDIATED_IMMUNITY	48	0.484905	1.20618	0.300403	0.731599
GO_CHEMOKINE_RECEPTOR_BINDING	63	0.48627	1.20618	0.313008	0.730069
GO_TELOMERE_CAPPING	38	0.462352	1.20598	0.323587	0.729108
GO_REGULATION_OF_NEUROINFLAMMATORY_RESPONSE	41	0.481301	1.2058	0.269068	0.728062
GO_REGULATION_OF_TELOMERASE_ACTIVITY	48	0.39425	1.20568	0.308911	0.726925
GO_REGULATION_OF_T_CELL_MEDIATED_CYTOTOXICITY	33	0.527041	1.20248	0.306748	0.734183
GO_SUBSTANTIA_NIGRA_DEVELOPMENT	40	0.339474	1.20076	0.251055	0.737492
GO_HISTONE_PHOSPHORYLATION	37	0.421578	1.20031	0.284232	0.737272
GO_HISTONE_UBIQUITINATION	48	0.426797	1.19901	0.317172	0.739491
GO_POSITIVE_REGULATION_OF_MEMBRANE_PERMEABILITY	64	0.337526	1.19894	0.25625	0.738165
GO_REGULATION_OF_CHROMOSOME_ORGANIZATION	333	0.361552	1.19827	0.320487	0.738571
GO_ESTABLISHMENT_OF_ORGANELLE_LOCALIZATION	417	0.348165	1.1982	0.306452	0.737221
GO_REGULATION_OF_B_CELL_APOPTOTIC_PROCESS	20	0.486963	1.19809	0.312377	0.736054
GO_POSITIVE_REGULATION_OF_ERBB_SIGNALING_PATHWAY	37	0.418977	1.19629	0.272532	0.739591
GO_NEGATIVE_REGULATION_OF_MACROAUTOPHAGY	32	0.437403	1.19603	0.302789	0.738804
GO_POSITIVE_REGULATION_OF_ACUTE_INFLAMMATORY_RESPONSE	31	0.486189	1.19491	0.289421	0.740309
GO_REGULATION_OF_RUFFLE_ASSEMBLY	29	0.415604	1.19458	0.259023	0.739726
GO_PYRIMIDINE_CONTAINING_COMPOUND_BIOSYNTHETIC_PROCESS	38	0.385161	1.19396	0.281376	0.739904
GO_TELOMERASE_HOLOENZYME_COMPLEX	21	0.422899	1.19346	0.296451	0.739697
GO_MAGNESIUM_ION_TRANSPORT	17	0.526831	1.19253	0.312	0.740692
GO_MAGNESIUM_ION_TRANSMEMBRANE_TRANSPORTER_ACTIVITY	16	0.533918	1.1924	0.322645	0.739577
GO_PROTEIN_HETEROTETRAMERIZATION	15	0.441839	1.19225	0.269841	0.73853
GO_RAC_GTPASE_BINDING	69	0.43564	1.19186	0.325866	0.738063
GO_REGULATION_OF_OXIDATIVE_PHOSPHORYLATION	30	0.34257	1.19128	0.251111	0.738185
GO_POSITIVE_REGULATION_OF_PROTEIN_TYROSINE_KINASE_ACTIVITY	58	0.413615	1.18987	0.288032	0.740658
GO_PHOSPHATIDYLINOSITOL_3_PHOSPHATE_BINDING	46	0.394174	1.18837	0.271805	0.743302
GO_EPIDERMIS_DEVELOPMENT	468	0.319776	1.18609	0.252193	0.748154
GO_INTERCELLULAR_BRIDGE	70	0.367284	1.18597	0.312102	0.74695
GO_INHIBITORY_SYNAPSE_ASSEMBLY	16	0.444478	1.18535	0.244499	0.747172
GO_CYTOPLASMIC_PATTERN_RECOGNITION_RECEPTOR_SIGNALING_PATHWAY_IN_RESPONSE_TO_VIRUS	28	0.42857	1.18512	0.336134	0.746338
GO_INFLAMMATORY_RESPONSE_TO_ANTIGENIC_STIMULUS	63	0.431681	1.18496	0.293869	0.745272
GO_RESOLUTION_OF_MEIOTIC_RECOMBINATION_INTERMEDIATES	15	0.501256	1.18452	0.286638	0.744969
GO_NEGATIVE_REGULATION_OF_CELL_KILLING	24	0.531668	1.18417	0.345912	0.744439
GO_ESTABLISHMENT_OF_PROTEIN_LOCALIZATION_TO_TELOMERE	18	0.448682	1.18282	0.315789	0.746677
GO_INTERLEUKIN_5_PRODUCTION	20	0.461477	1.18176	0.257019	0.748167
GO_HOST_CELLULAR_COMPONENT	62	0.416513	1.18034	0.356275	0.750413
GO_REGULATION_OF_UBIQUITIN_PROTEIN_TRANSFERASE_ACTIVITY	54	0.378985	1.17956	0.345455	0.751164
GO_PROTEIN_MONOUBIQUITINATION	66	0.424479	1.17847	0.353877	0.752626
GO_REGULATION_OF_INTRINSIC_APOPTOTIC_SIGNALING_PATHWAY	159	0.310318	1.17836	0.309055	0.75146
GO_RESPONSE_TO_MITOCHONDRIAL_DEPOLARISATION	19	0.465699	1.17817	0.331361	0.750478
GO_VIRAL_RELEASE_FROM_HOST_CELL	34	0.416076	1.17764	0.349398	0.750431
GO_REGULATION_OF_SUPEROXIDE_ANION_GENERATION	22	0.457576	1.17744	0.333333	0.749447
GO_NUCLEOBASE_METABOLIC_PROCESS	34	0.377409	1.17671	0.290618	0.750061
GO_REGULATION_OF_DNA_METHYLATION	27	0.379175	1.17595	0.291855	0.75069
GO_SPHINGOLIPID_BINDING	24	0.471199	1.17581	0.306288	0.749618
GO_LIGASE_ACTIVITY_FORMING_CARBON_OXYGEN_BONDS	22	0.479677	1.17554	0.339321	0.74896
GO_TRANS_GOLGI_NETWORK_MEMBRANE	86	0.36105	1.17491	0.309859	0.749166
GO_PIGMENT_GRANULE	105	0.339379	1.17453	0.32766	0.748784
GO_NEGATIVE_REGULATION_OF_CELL_CYCLE_G1_S_PHASE_TRANSITION	130	0.344163	1.17366	0.323643	0.749799
GO_RESPONSE_TO_DSRNA	51	0.37983	1.17275	0.327239	0.750812
GO_PARALLEL_FIBER_TO_PURKINJE_CELL_SYNAPSE	16	0.457027	1.17247	0.24173	0.750166
GO_PEPTIDYL_THREONINE_MODIFICATION	122	0.381955	1.17219	0.31677	0.749458
GO_NEGATIVE_REGULATION_OF_INTRINSIC_APOPTOTIC_SIGNALING_PATHWAY_BY_P53_CLASS_MEDIATOR	21	0.399562	1.17197	0.302187	0.748594
GO_POSITIVE_REGULATION_OF_NUCLEOCYTOPLASMIC_TRANSPORT	66	0.371772	1.17122	0.336117	0.749204
GO_SKIN_DEVELOPMENT	420	0.317143	1.17026	0.263948	0.750493
GO_LAMELLAR_BODY	17	0.440986	1.16966	0.259423	0.750602
GO_PLASMA_MEMBRANE_PHOSPHOLIPID_SCRAMBLING	17	0.449763	1.16952	0.256351	0.749593
GO_GLYCOPROTEIN_CATABOLIC_PROCESS	25	0.388116	1.16832	0.29661	0.751373
GO_NEGATIVE_REGULATION_OF_LEUKOCYTE_MEDIATED_CYTOTOXICITY	20	0.567882	1.1664	0.364979	0.755086
GO_INTRACELLULAR_STEROL_TRANSPORT	24	0.420894	1.16459	0.284585	0.758428
GO_CELLULAR_RESPONSE_TO_DSRNA	20	0.450032	1.16277	0.348178	0.761952
GO_FICOLIN_1_RICH_GRANULE_MEMBRANE	57	0.432746	1.16119	0.341667	0.764791
GO_NUCLEAR_MATRIX	108	0.381612	1.16065	0.366733	0.764934
GO_CELL_CYCLE_ARREST	230	0.33602	1.16059	0.34413	0.763665
GO_AUDITORY_RECEPTOR_CELL_DEVELOPMENT	19	0.401805	1.16036	0.280285	0.762853
GO_PRERIBOSOME_SMALL_SUBUNIT_PRECURSOR	15	0.509924	1.16033	0.339357	0.761518
GO_MODIFICATION_OF_SYNAPTIC_STRUCTURE	24	0.434604	1.15959	0.331967	0.762154
GO_REGULATION_OF_SYNCYTIUM_FORMATION_BY_PLASMA_MEMBRANE_FUSION	28	0.454967	1.15883	0.30474	0.762836
GO_GLUTAMINE_FAMILY_AMINO_ACID_BIOSYNTHETIC_PROCESS	16	0.42134	1.15875	0.315041	0.761668
GO_CALCIUM_ION_REGULATED_EXOCYTOSIS_OF_NEUROTRANSMITTER	23	0.427989	1.15833	0.266033	0.761596
GO_NEGATIVE_REGULATION_OF_CHROMATIN_ORGANIZATION	52	0.382388	1.15793	0.345603	0.761312
GO_ESTABLISHMENT_OF_PROTEIN_LOCALIZATION_TO_CHROMOSOME	23	0.425969	1.15764	0.347475	0.760735
GO_CIRCADIAN_SLEEP_WAKE_CYCLE	28	0.395792	1.15658	0.264916	0.762159
GO_T_HELPER_1_TYPE_IMMUNE_RESPONSE	44	0.498541	1.15633	0.363454	0.761441
GO_NEGATIVE_REGULATION_OF_GENE_SILENCING	26	0.386413	1.15602	0.292793	0.760882
GO_VESICLE_BUDDING_FROM_MEMBRANE	108	0.344773	1.15589	0.335294	0.759856
GO_SOMATIC_RECOMBINATION_OF_IMMUNOGLOBULIN_GENE_SEGMENTS	50	0.44415	1.15481	0.338776	0.761443
GO_RESPONSE_TO_GONADOTROPIN	27	0.42833	1.15366	0.306818	0.762966
GO_EOSINOPHIL_CHEMOTAXIS	18	0.560303	1.15326	0.337398	0.762711
GO_REGULATION_OF_DNA_METABOLIC_PROCESS	332	0.339727	1.1515	0.346473	0.765916
GO_TRANSLATION_INITIATION_FACTOR_ACTIVITY	50	0.376948	1.15073	0.364919	0.766588
GO_MALE_MEIOTIC_NUCLEAR_DIVISION	45	0.369006	1.14903	0.282974	0.76957
GO_RIBONUCLEOSIDE_MONOPHOSPHATE_BIOSYNTHETIC_PROCESS	32	0.386273	1.14836	0.346392	0.769954
GO_REGULATION_OF_CELL_CYCLE_G1_S_PHASE_TRANSITION	202	0.328432	1.14797	0.336614	0.769705
GO_BLASTOCYST_DEVELOPMENT	103	0.316785	1.14747	0.316854	0.769646
GO_DNA_DIRECTED_DNA_POLYMERASE_ACTIVITY	23	0.44899	1.14746	0.361789	0.768302
GO_NEGATIVE_REGULATION_OF_HISTONE_MODIFICATION	43	0.371789	1.14732	0.366733	0.767247
GO_RESPONSE_TO_UV	135	0.365935	1.14713	0.369388	0.766357
GO_TELOMERASE_RNA_BINDING	21	0.42826	1.14673	0.35041	0.766046
GO_POSITIVE_REGULATION_OF_MRNA_SPLICING_VIA_SPLICEOSOME	23	0.363753	1.14668	0.308559	0.76482
GO_GLYCOLYTIC_PROCESS_THROUGH_FRUCTOSE_6_PHOSPHATE	29	0.33304	1.14402	0.304965	0.770366
GO_PROTEIN_TARGETING_TO_LYSOSOME	22	0.469432	1.14398	0.37251	0.769109
GO_POSITIVE_REGULATION_OF_PROTEIN_IMPORT	42	0.361556	1.1437	0.352052	0.768458
GO_NCRNA_EXPORT_FROM_NUCLEUS	36	0.48655	1.14337	0.38856	0.767946
GO_VACUOLAR_TRANSPORT	148	0.353582	1.14318	0.388889	0.767127
GO_POSITIVE_REGULATION_OF_TELOMERASE_ACTIVITY	36	0.394084	1.14307	0.365759	0.76606
GO_TOLL_LIKE_RECEPTOR_3_SIGNALING_PATHWAY	20	0.500475	1.14267	0.394118	0.76593
GO_DENDRITIC_SPINE_MAINTENANCE	20	0.404371	1.14247	0.302273	0.765147
GO_POSITIVE_REGULATION_OF_EXOCYTOSIS	90	0.326677	1.14153	0.268765	0.766187
GO_O_ACYLTRANSFERASE_ACTIVITY	47	0.343233	1.1412	0.303614	0.765696
GO_POSITIVE_REGULATION_OF_TISSUE_REMODELING	45	0.398047	1.13957	0.319018	0.768607
GO_CELLULAR_RESPONSE_TO_RADIATION	180	0.327054	1.13938	0.346473	0.767741
GO_POSITIVE_REGULATION_OF_RELEASE_OF_CYTOCHROME_C_FROM_MITOCHONDRIA	28	0.374956	1.13834	0.330629	0.769173
GO_CERAMIDE_METABOLIC_PROCESS	93	0.310617	1.13829	0.330337	0.768033
GO_REGULATION_OF_CYTOPLASMIC_TRANSPORT	23	0.436104	1.13767	0.373541	0.768181
GO_REGULATION_OF_CD4_POSITIVE_ALPHA_BETA_T_CELL_DIFFERENTIATION	48	0.484898	1.13767	0.380198	0.766882
GO_LEUKOCYTE_ACTIVATION_INVOLVED_IN_INFLAMMATORY_RESPONSE	48	0.471798	1.13752	0.371369	0.76592
GO_POSITIVE_REGULATION_OF_CELL_DIVISION	85	0.360535	1.1375	0.315668	0.764666
GO_INVADOPODIUM	15	0.477252	1.13724	0.363462	0.764023
GO_CELL_AGING	113	0.352318	1.13716	0.377432	0.762918
GO_PHOSPHATIDYLINOSITOL_4_PHOSPHATE_BINDING	27	0.411461	1.13675	0.351738	0.762627
GO_MICROTUBULE_ORGANIZING_CENTER_ORGANIZATION	132	0.396448	1.1366	0.392786	0.761689
GO_DENDRITIC_CELL_DIFFERENTIATION	44	0.483153	1.13655	0.381526	0.76056
GO_REGULATION_OF_T_HELPER_CELL_DIFFERENTIATION	36	0.485229	1.1361	0.371032	0.760503
GO_POSITIVE_REGULATION_OF_BONE_RESORPTION	19	0.454782	1.13543	0.338843	0.760873
GO_CYTOKINE_RECEPTOR_BINDING	260	0.363731	1.13382	0.341202	0.76377
GO_POSITIVE_REGULATION_OF_LEUKOCYTE_APOPTOTIC_PROCESS	29	0.447467	1.13358	0.369231	0.763064
GO_MITOPHAGY	23	0.47577	1.1332	0.373518	0.762769
GO_PROTEASE_BINDING	133	0.344234	1.13311	0.373102	0.761728
GO_SYNAPTIC_VESICLE_CYTOSKELETAL_TRANSPORT	18	0.429374	1.13195	0.372709	0.763426
GO_RNA_POLYMERASE_ACTIVITY	43	0.371661	1.13182	0.385246	0.762473
GO_COPII_COATED_VESICLE_BUDDING	72	0.362271	1.13112	0.363281	0.762969
GO_AMINO_SUGAR_METABOLIC_PROCESS	39	0.369622	1.13112	0.297959	0.7617
GO_ANTIBACTERIAL_HUMORAL_RESPONSE	49	0.380848	1.13112	0.290761	0.760437
GO_NUCLEAR_ENVELOPE_ORGANIZATION	52	0.373638	1.12968	0.39798	0.762862
GO_CARBOHYDRATE_KINASE_ACTIVITY	21	0.425605	1.12955	0.340381	0.761883
GO_MEMBRANE_PROTEIN_PROTEOLYSIS	60	0.375394	1.12919	0.381048	0.761471
GO_POSITIVE_REGULATION_OF_CD4_POSITIVE_ALPHA_BETA_T_CELL_ACTIVATION	36	0.487643	1.12875	0.403922	0.76131
GO_GTP_DEPENDENT_PROTEIN_BINDING	23	0.42232	1.12854	0.372591	0.760628
GO_MEMBRANE_PROTEIN_ECTODOMAIN_PROTEOLYSIS	41	0.402841	1.12854	0.377593	0.759387
GO_TRANSFORMING_GROWTH_FACTOR_BETA_PRODUCTION	38	0.435876	1.1277	0.375486	0.760312
GO_POSITIVE_REGULATION_OF_ACTIN_NUCLEATION	16	0.428567	1.12692	0.343496	0.760987
GO_POSITIVE_REGULATION_OF_ADAPTIVE_IMMUNE_RESPONSE	102	0.43379	1.12627	0.39759	0.761436
GO_POSITIVE_REGULATION_OF_ISOTYPE_SWITCHING	22	0.457288	1.12499	0.388	0.763439
GO_METALLOENDOPEPTIDASE_ACTIVITY	104	0.36841	1.12482	0.326087	0.762594
GO_NUCLEOSOMAL_DNA_BINDING	24	0.434963	1.12235	0.383721	0.767634
GO_AMINO_ACID_ACTIVATION	30	0.432787	1.12204	0.403042	0.767123
GO_REGULATION_OF_CELL_AGING	58	0.361405	1.12093	0.372781	0.768541
GO_NUCLEAR_PERIPHERY	130	0.36705	1.12026	0.420523	0.768926
GO_CELLULAR_RESPONSE_TO_ALKALOID	35	0.360612	1.12016	0.317618	0.767902
GO_NUCLEOTIDE_SUGAR_METABOLIC_PROCESS	37	0.399146	1.11963	0.393762	0.767914
GO_LONG_CHAIN_FATTY_ACID_BIOSYNTHETIC_PROCESS	33	0.384823	1.11962	0.324009	0.766687
GO_SPHINGOLIPID_METABOLIC_PROCESS	150	0.305017	1.11929	0.311947	0.7663
GO_DEFENSE_RESPONSE_TO_FUNGUS	41	0.367101	1.1189	0.297235	0.766026
GO_POSITIVE_REGULATION_OF_RESPONSE_TO_ENDOPLASMIC_RETICULUM_STRESS	37	0.409698	1.11863	0.415323	0.765547
GO_SECRETORY_GRANULE_MEMBRANE	296	0.331142	1.1181	0.400428	0.7657
GO_CELLULAR_RESPONSE_TO_VITAMIN	32	0.381594	1.11758	0.309168	0.765738
GO_CYTOSOLIC_SMALL_RIBOSOMAL_SUBUNIT	45	0.385029	1.11729	0.353183	0.765263
GO_INTESTINAL_EPITHELIAL_CELL_DIFFERENTIATION	24	0.38296	1.11643	0.311364	0.766141
GO_PML_BODY	101	0.363782	1.11598	0.410714	0.765966
GO_BASAL_PLASMA_MEMBRANE	50	0.396545	1.11555	0.354298	0.765806
GO_CD4_POSITIVE_ALPHA_BETA_T_CELL_CYTOKINE_PRODUCTION	23	0.469011	1.11531	0.381818	0.765165
GO_REGULATION_OF_RESPONSE_TO_DNA_DAMAGE_STIMULUS	205	0.347667	1.11516	0.386774	0.764292
GO_RESPONSE_TO_UV_C	16	0.416026	1.11404	0.394422	0.765856
GO_MYELOID_DENDRITIC_CELL_ACTIVATION	29	0.504413	1.11392	0.406504	0.764917
GO_MEMBRANE_RAFT_ORGANIZATION	25	0.388339	1.11363	0.358607	0.764362
GO_COLLAGEN_METABOLIC_PROCESS	110	0.365562	1.11319	0.361963	0.76417
GO_REGULATION_OF_TRANSCRIPTION_ELONGATION_FROM_RNA_POLYMERASE_II_PROMOTER	26	0.418987	1.11205	0.430328	0.765702
GO_PHOSPHATIDYLSERINE_ACYL_CHAIN_REMODELING	20	0.419668	1.11191	0.339367	0.764847
GO_PHOSPHATIDYLETHANOLAMINE_ACYL_CHAIN_REMODELING	23	0.391849	1.11171	0.334096	0.76412
GO_AXONAL_FASCICULATION	23	0.445728	1.11156	0.371663	0.763324
GO_NUCLEOTIDE_EXCISION_REPAIR	109	0.361304	1.11077	0.432692	0.764014
GO_POSITIVE_REGULATION_OF_ALPHA_BETA_T_CELL_DIFFERENTIATION	47	0.446793	1.11067	0.414141	0.76305
GO_NEGATIVE_REGULATION_OF_CELL_AGING	28	0.389132	1.10904	0.350951	0.765819
GO_SPHINGOID_METABOLIC_PROCESS	18	0.433414	1.10853	0.365904	0.765969
GO_REGULATION_OF_CIRCADIAN_SLEEP_WAKE_CYCLE	22	0.40206	1.10835	0.30179	0.765228
GO_T_CELL_ACTIVATION_INVOLVED_IN_IMMUNE_RESPONSE	109	0.422004	1.10819	0.378168	0.764415
GO_INNER_EAR_RECEPTOR_CELL_STEREOCILIUM_ORGANIZATION	27	0.343076	1.10723	0.33414	0.765632
GO_POSITIVE_REGULATION_OF_DNA_METABOLIC_PROCESS	185	0.328899	1.1068	0.406571	0.765428
GO_AMELOGENESIS	22	0.419347	1.10646	0.360169	0.765103
GO_EXONUCLEASE_ACTIVITY	79	0.366617	1.10631	0.435484	0.764302
GO_CYTOKINE_ACTIVITY	232	0.370343	1.10614	0.359649	0.763546
GO_PROTEIN_INSERTION_INTO_MEMBRANE	61	0.307545	1.106	0.366316	0.762738
GO_VACUOLAR_LUMEN	167	0.307046	1.1053	0.370933	0.763277
GO_STRUCTURAL_CONSTITUENT_OF_SYNAPSE	18	0.443415	1.10512	0.356522	0.76273
GO_RESPONSE_TO_TYPE_I_INTERFERON	98	0.388907	1.10488	0.416016	0.762091
GO_NEGATIVE_REGULATION_OF_T_CELL_MEDIATED_IMMUNITY	19	0.492461	1.10376	0.398357	0.76356
GO_NUCLEAR_TRANSCRIBED_MRNA_CATABOLIC_PROCESS_NONSENSE_MEDIATED_DECAY	119	0.373877	1.10289	0.4375	0.764513
GO_GOLGI_ASSOCIATED_VESICLE	175	0.307293	1.10221	0.386831	0.765033
GO_VESICLE_DOCKING_INVOLVED_IN_EXOCYTOSIS	44	0.342854	1.10202	0.382932	0.764273
GO_REGULATION_OF_MRNA_3_END_PROCESSING	27	0.43752	1.1017	0.432271	0.763952
GO_REGULATION_OF_MITOCHONDRION_ORGANIZATION	185	0.302397	1.10082	0.387033	0.76483
GO_VIRAL_LIFE_CYCLE	330	0.326001	1.09921	0.400826	0.76759
GO_POSITIVE_REGULATION_OF_INTERLEUKIN_6_PRODUCTION	86	0.408772	1.09845	0.406186	0.768247
GO_MODIFICATION_OF_POSTSYNAPTIC_STRUCTURE	18	0.435315	1.09721	0.37422	0.770153
GO_REGULATION_OF_T_CELL_MEDIATED_IMMUNITY	71	0.422695	1.09388	0.423077	0.777089
GO_POSITIVE_REGULATION_OF_TYPE_2_IMMUNE_RESPONSE	16	0.522195	1.09331	0.420432	0.777325
GO_VASCULAR_ENDOTHELIAL_GROWTH_FACTOR_PRODUCTION	63	0.348756	1.09233	0.359375	0.778677
GO_NUCLEOTIDE_EXCISION_REPAIR_DNA_INCISION	39	0.377277	1.09228	0.417143	0.777643
GO_PHOSPHATIDYLINOSITOL_PHOSPHATE_BINDING	170	0.318486	1.09217	0.366446	0.776774
GO_POSITIVE_REGULATION_OF_METALLOPEPTIDASE_ACTIVITY	15	0.426906	1.09194	0.366089	0.776168
GO_EOSINOPHIL_MIGRATION	22	0.510787	1.09155	0.391919	0.775963
GO_PROTEIN_K48_LINKED_UBIQUITINATION	55	0.376776	1.0911	0.431373	0.77601
GO_RETROGRADE_VESICLE_MEDIATED_TRANSPORT_GOLGI_TO_ENDOPLASMIC_RETICULUM	85	0.344532	1.09058	0.426854	0.776098
GO_REGULATION_OF_GENE_SILENCING	98	0.355765	1.09023	0.424116	0.775838
GO_MONOSACCHARIDE_CATABOLIC_PROCESS	64	0.294101	1.0902	0.342529	0.774738
GO_FIBROBLAST_PROLIFERATION	83	0.333629	1.09013	0.405567	0.773797
GO_MITOGEN_ACTIVATED_PROTEIN_KINASE_BINDING	32	0.409	1.08955	0.396728	0.774007
GO_AMYLOID_BETA_CLEARANCE	37	0.408468	1.08929	0.414487	0.773481
GO_REGULATION_OF_TOLL_LIKE_RECEPTOR_4_SIGNALING_PATHWAY	23	0.444804	1.08927	0.38013	0.772418
GO_CELLULAR_RESPONSE_TO_LOW_DENSITY_LIPOPROTEIN_PARTICLE_STIMULUS	23	0.389324	1.08883	0.367391	0.772254
GO_NEGATIVE_REGULATION_OF_INTRINSIC_APOPTOTIC_SIGNALING_PATHWAY_IN_RESPONSE_TO_DNA_DAMAGE	30	0.375759	1.08821	0.409182	0.77261
GO_AUTOPHAGY_OF_MITOCHONDRION	76	0.345818	1.08821	0.420543	0.771484
GO_ACTIN_FILAMENT_BASED_TRANSPORT	21	0.414091	1.08782	0.41517	0.771239
GO_REGULATION_OF_INTRINSIC_APOPTOTIC_SIGNALING_PATHWAY_BY_P53_CLASS_MEDIATOR	29	0.325408	1.08766	0.374245	0.770497
GO_SELECTIVE_AUTOPHAGY	55	0.380748	1.0871	0.434185	0.770822
GO_MITOTIC_SPINDLE_POLE	30	0.424314	1.08582	0.427125	0.772826
GO_PYRIMIDINE_NUCLEOSIDE_METABOLIC_PROCESS	34	0.362979	1.085	0.350427	0.773725
GO_NEGATIVE_REGULATION_OF_INTERLEUKIN_10_PRODUCTION	22	0.485041	1.08466	0.404908	0.773393
GO_TRANSLATION_REGULATOR_ACTIVITY_NUCLEIC_ACID_BINDING	105	0.314555	1.08433	0.423228	0.773056
GO_PHOSPHOLIPASE_A2_ACTIVITY	27	0.371088	1.08338	0.340278	0.774221
GO_SPHINGOLIPID_BIOSYNTHETIC_PROCESS	95	0.319124	1.08334	0.35123	0.773153
GO_NEGATIVE_REGULATION_OF_MORPHOGENESIS_OF_AN_EPITHELIUM	17	0.454359	1.08316	0.407336	0.772423
GO_NEGATIVE_REGULATION_OF_LEUKOCYTE_PROLIFERATION	83	0.412753	1.08314	0.420259	0.77136
GO_T_HELPER_2_CELL_CYTOKINE_PRODUCTION	15	0.451978	1.08286	0.400826	0.770893
GO_PROTEIN_PHOSPHATASE_2A_BINDING	31	0.374754	1.08189	0.407643	0.772026
GO_POSITIVE_REGULATION_OF_PROTEIN_MATURATION	25	0.376609	1.08093	0.359202	0.773365
GO_RIG_I_SIGNALING_PATHWAY	23	0.403683	1.0807	0.432548	0.77283
GO_VESICLE_FUSION_TO_PLASMA_MEMBRANE	23	0.370795	1.08051	0.352818	0.772156
GO_FUCOSE_METABOLIC_PROCESS	15	0.434804	1.08033	0.401848	0.771473
GO_INTERFERON_GAMMA_MEDIATED_SIGNALING_PATHWAY	89	0.405119	1.08023	0.435583	0.770624
GO_INTERLEUKIN_13_PRODUCTION	21	0.434764	1.07928	0.399168	0.77177
GO_ANIMAL_ORGAN_REGENERATION	75	0.328869	1.07893	0.383028	0.771512
GO_CELL_DEATH_IN_RESPONSE_TO_OXIDATIVE_STRESS	94	0.32065	1.07858	0.37577	0.771159
GO_VESICLE_TARGETING_TO_FROM_OR_WITHIN_GOLGI	73	0.349425	1.07845	0.429126	0.770365
GO_REGULATION_OF_TELOMERE_MAINTENANCE	77	0.370913	1.07777	0.472441	0.770952
GO_REGULATION_OF_PROTEIN_LOCALIZATION_TO_SYNAPSE	26	0.376709	1.07733	0.411135	0.770802
GO_NUCLEOSIDE_MONOPHOSPHATE_METABOLIC_PROCESS	68	0.320214	1.07706	0.395918	0.770386
GO_NEGATIVE_REGULATION_OF_TYPE_I_INTERFERON_PRODUCTION	44	0.407962	1.07653	0.441478	0.770477
GO_POSITIVE_REGULATION_OF_INTRACELLULAR_PROTEIN_TRANSPORT	179	0.315082	1.07623	0.414079	0.770143
GO_ENDOSOME_ORGANIZATION	75	0.336002	1.07219	0.441352	0.778363
GO_POSITIVE_REGULATION_OF_DNA_REPAIR	59	0.347046	1.07198	0.4	0.777737
GO_CHRONIC_INFLAMMATORY_RESPONSE	20	0.523901	1.07136	0.455102	0.778128
GO_GLYCOSYL_COMPOUND_BIOSYNTHETIC_PROCESS	40	0.348511	1.0709	0.410101	0.778157
GO_MICROTUBULE_NUCLEATION	29	0.405951	1.07051	0.471264	0.778055
GO_AZUROPHIL_GRANULE_MEMBRANE	56	0.335723	1.07032	0.39666	0.777409
GO_NON_RECOMBINATIONAL_REPAIR	75	0.382299	1.06955	0.482072	0.778097
GO_REGULATION_OF_MITOPHAGY	16	0.461826	1.06902	0.478431	0.778197
GO_POSITIVE_REGULATION_OF_MONOOXYGENASE_ACTIVITY	31	0.370531	1.06879	0.375281	0.777663
GO_LYSOSOMAL_PROTEIN_CATABOLIC_PROCESS	15	0.429292	1.06828	0.426036	0.777806
GO_POSITIVE_REGULATION_OF_DNA_BINDING	56	0.306282	1.06624	0.377011	0.781358
GO_POSITIVE_REGULATION_OF_PROTEIN_LOCALIZATION_TO_MEMBRANE	124	0.308924	1.0662	0.420382	0.780367
GO_MHC_CLASS_II_BIOSYNTHETIC_PROCESS	16	0.453925	1.06577	0.431373	0.780331
GO_POSITIVE_REGULATION_OF_INTERLEUKIN_10_PRODUCTION	37	0.453155	1.0642	0.436853	0.783231
GO_ADP_BINDING	34	0.37	1.06397	0.43129	0.782708
GO_BRANCHING_INVOLVED_IN_MAMMARY_GLAND_DUCT_MORPHOGENESIS	24	0.392455	1.06356	0.437086	0.782589
GO_PROTEIN_CATABOLIC_PROCESS_IN_THE_VACUOLE	19	0.381626	1.06244	0.425358	0.784052
GO_REGULATION_OF_PROTEIN_TYROSINE_KINASE_ACTIVITY	89	0.350997	1.06217	0.413223	0.783678
GO_PROTEIN_LOCALIZATION_TO_CHROMOSOME_TELOMERIC_REGION	29	0.398712	1.06182	0.446465	0.783326
GO_CYTOPLASMIC_TRANSLATION	101	0.320775	1.06175	0.461538	0.782401
GO_REGULATION_OF_ISOTYPE_SWITCHING	31	0.419525	1.06057	0.449187	0.784052
GO_TRNA_TRANSPORT	35	0.441158	1.05984	0.519608	0.784681
GO_NEUROINFLAMMATORY_RESPONSE	75	0.398323	1.05872	0.430672	0.786237
GO_PHOSPHATIDYLGLYCEROL_ACYL_CHAIN_REMODELING	18	0.376812	1.05843	0.403423	0.785755
GO_MULTI_ORGANISM_LOCALIZATION	64	0.367467	1.05718	0.469185	0.787666
GO_PRESYNAPTIC_MODULATION_OF_CHEMICAL_SYNAPTIC_TRANSMISSION	15	0.392941	1.05697	0.380952	0.787091
GO_VESICLE_LUMEN	322	0.285926	1.05654	0.392857	0.787089
GO_POSITIVE_REGULATION_OF_ALPHA_BETA_T_CELL_PROLIFERATION	21	0.552486	1.05557	0.466258	0.788124
GO_INHIBITORY_EXTRACELLULAR_LIGAND_GATED_ION_CHANNEL_ACTIVITY	15	0.418873	1.05556	0.37766	0.787083
GO_POSITIVE_REGULATION_OF_INTRACELLULAR_TRANSPORT	215	0.303234	1.05494	0.454918	0.787419
GO_POSITIVE_REGULATION_OF_APOPTOTIC_SIGNALING_PATHWAY	177	0.295642	1.05473	0.421471	0.786874
GO_T_HELPER_2_CELL_DIFFERENTIATION	15	0.473307	1.05439	0.439922	0.786578
GO_ERBB2_SIGNALING_PATHWAY	31	0.365346	1.05389	0.421162	0.786692
GO_MICROTUBULE_MOTOR_ACTIVITY	77	0.364488	1.05383	0.423077	0.785771
GO_ACTIVATION_OF_CYSTEINE_TYPE_ENDOPEPTIDASE_ACTIVITY	15	0.438554	1.05349	0.425	0.785517
GO_PODOSOME	29	0.411329	1.05338	0.461538	0.784713
GO_CYTOPLASMIC_PATTERN_RECOGNITION_RECEPTOR_SIGNALING_PATHWAY	63	0.361603	1.05231	0.444	0.786082
GO_CXCR_CHEMOKINE_RECEPTOR_BINDING	17	0.497651	1.0519	0.435146	0.786021
GO_RESPONSE_TO_INTERLEUKIN_7	28	0.377525	1.05167	0.4375	0.78553
GO_BASAL_PART_OF_CELL	68	0.366635	1.05153	0.408207	0.784809
GO_POSITIVE_REGULATION_OF_MACROPHAGE_ACTIVATION	26	0.45454	1.05061	0.4125	0.785983
GO_REGULATION_OF_HISTONE_DEACETYLATION	29	0.355285	1.04999	0.445361	0.786327
GO_NEGATIVE_REGULATION_OF_NATURAL_KILLER_CELL_MEDIATED_IMMUNITY	17	0.504612	1.04961	0.461378	0.78613
GO_EPHRIN_RECEPTOR_SIGNALING_PATHWAY	87	0.306733	1.0496	0.42827	0.785096
GO_TRANSFERASE_COMPLEX_TRANSFERRING_PHOSPHORUS_CONTAINING_GROUPS	247	0.323003	1.04952	0.463265	0.78425
GO_SYNAPTONEMAL_COMPLEX_ORGANIZATION	23	0.368202	1.04936	0.416471	0.783538
GO_KERATINOCYTE_PROLIFERATION	50	0.372293	1.04936	0.41048	0.782505
GO_MOTOR_ACTIVITY	132	0.320694	1.04915	0.388764	0.78193
GO_SUBSTRATE_DEPENDENT_CELL_MIGRATION	26	0.427915	1.04913	0.433468	0.78096
GO_PRERIBOSOME_LARGE_SUBUNIT_PRECURSOR	23	0.42167	1.04913	0.498062	0.779926
GO_LIVER_REGENERATION	32	0.346264	1.04903	0.403118	0.779139
GO_POSITIVE_REGULATION_OF_CELL_CYCLE_G1_S_PHASE_TRANSITION	60	0.327279	1.04899	0.420732	0.778199
GO_REGULATION_OF_PEPTIDYL_LYSINE_ACETYLATION	61	0.306277	1.04897	0.390782	0.777216
GO_NEGATIVE_REGULATION_OF_KERATINOCYTE_PROLIFERATION	18	0.432296	1.04879	0.421053	0.776617
GO_MATURATION_OF_SSU_RRNA	47	0.384437	1.04842	0.472486	0.776401
GO_NUCLEAR_ENVELOPE_REASSEMBLY	18	0.42786	1.04837	0.462428	0.775516
GO_ATPASE_ACTIVITY	407	0.325735	1.04697	0.459746	0.777946
GO_REGULATION_OF_HISTONE_H3_K9_METHYLATION	22	0.405712	1.04624	0.440426	0.778598
GO_PROTEOGLYCAN_BINDING	35	0.445633	1.04587	0.448065	0.778435
GO_ACTIVATION_OF_MAPK_ACTIVITY	151	0.319638	1.04562	0.416309	0.777936
GO_REGULATION_OF_MACROPHAGE_ACTIVATION	55	0.406026	1.0454	0.433684	0.777545
GO_POSITIVE_REGULATION_OF_INTERFERON_BETA_PRODUCTION	30	0.395466	1.04471	0.440162	0.778202
GO_RIBONUCLEOSIDE_CATABOLIC_PROCESS	21	0.390049	1.0447	0.407787	0.777205
GO_DEFENSE_RESPONSE_TO_GRAM_NEGATIVE_BACTERIUM	78	0.338054	1.04456	0.423529	0.776503
GO_APOPTOTIC_MITOCHONDRIAL_CHANGES	120	0.271047	1.04413	0.418511	0.776413
GO_SERINE_FAMILY_AMINO_ACID_BIOSYNTHETIC_PROCESS	17	0.390177	1.04413	0.430524	0.775414
GO_LATE_ENDOSOME_TO_VACUOLE_TRANSPORT_VIA_MULTIVESICULAR_BODY_SORTING_PATHWAY	17	0.389433	1.04395	0.453307	0.774863
GO_GLYCOLIPID_BINDING	25	0.363744	1.04368	0.423237	0.774448
GO_STRESS_GRANULE_ASSEMBLY	23	0.40892	1.04292	0.482283	0.775114
GO_SERINE_HYDROLASE_ACTIVITY	186	0.292729	1.04205	0.389022	0.776031
GO_POSITIVE_REGULATION_OF_HISTONE_METHYLATION	39	0.339654	1.04179	0.452381	0.775595
GO_REGULATION_OF_DNA_BINDING	119	0.289427	1.04106	0.440181	0.776249
GO_GOLGI_VESICLE_BUDDING	80	0.334828	1.04038	0.478516	0.77684
GO_NEGATIVE_REGULATION_OF_SIGNAL_TRANSDUCTION_IN_ABSENCE_OF_LIGAND	36	0.33664	1.03947	0.414847	0.777951
GO_REGULATION_OF_EPIDERMAL_GROWTH_FACTOR_ACTIVATED_RECEPTOR_ACTIVITY	30	0.37946	1.03888	0.451064	0.778292
GO_NEGATIVE_REGULATION_OF_GENE_EXPRESSION_EPIGENETIC	60	0.350112	1.03871	0.475207	0.777716
GO_INTRAMOLECULAR_TRANSFERASE_ACTIVITY	25	0.385038	1.03858	0.471513	0.777029
GO_INTERLEUKIN_10_PRODUCTION	61	0.415191	1.03769	0.44898	0.777984
GO_REGULATION_OF_GOLGI_ORGANIZATION	15	0.448273	1.03687	0.491968	0.778869
GO_NON_MEMBRANE_SPANNING_PROTEIN_TYROSINE_KINASE_ACTIVITY	46	0.392648	1.03602	0.466942	0.779696
GO_PHOSPHATIDYLINOSITOL_BISPHOSPHATE_BINDING	113	0.288359	1.03573	0.425234	0.779367
GO_RESPONSE_TO_ANGIOTENSIN	28	0.350609	1.03475	0.444186	0.7806
GO_PHOSPHATIDYLINOSITOL_4_5_BISPHOSPHATE_BINDING	76	0.297039	1.03465	0.425532	0.779821
GO_REGULATION_OF_MEMBRANE_PERMEABILITY	85	0.275949	1.03392	0.443515	0.780486
GO_PROTEIN_DNA_COMPLEX	110	0.290456	1.03379	0.453782	0.779788
GO_T_CELL_CYTOKINE_PRODUCTION	43	0.394976	1.03376	0.449799	0.778872
GO_LYMPHOCYTE_APOPTOTIC_PROCESS	73	0.354159	1.03362	0.454741	0.778184
GO_FILOPODIUM	101	0.321661	1.03335	0.435789	0.777788
GO_REGULATION_OF_PROTEIN_ACETYLATION	75	0.305441	1.03333	0.423077	0.776847
GO_WATER_HOMEOSTASIS	79	0.303192	1.03245	0.441379	0.777948
GO_VESICLE_TARGETING	92	0.332006	1.03205	0.469903	0.777898
GO_ACYLGLYCEROL_O_ACYLTRANSFERASE_ACTIVITY	22	0.33071	1.03158	0.421296	0.777931
GO_NEGATIVE_REGULATION_OF_ORGANELLE_ORGANIZATION	387	0.292532	1.0297	0.450939	0.781127
GO_CIRCADIAN_SLEEP_WAKE_CYCLE_SLEEP	22	0.375474	1.02955	0.394541	0.780459
GO_CARBOHYDRATE_PHOSPHORYLATION	22	0.388489	1.02912	0.450526	0.780398
GO_REGULATION_OF_TYPE_I_INTERFERON_MEDIATED_SIGNALING_PATHWAY	35	0.372504	1.02817	0.464646	0.781479
GO_POSITIVE_REGULATION_OF_VIRAL_LIFE_CYCLE	60	0.333617	1.02766	0.47379	0.781618
GO_POSITIVE_REGULATION_OF_CELLULAR_PROTEIN_LOCALIZATION	330	0.289702	1.02749	0.459016	0.781019
GO_ARACHIDONIC_ACID_METABOLIC_PROCESS	58	0.331844	1.02718	0.410926	0.780736
GO_POSITIVE_REGULATION_OF_SMOOTH_MUSCLE_CELL_APOPTOTIC_PROCESS	17	0.388111	1.0262	0.45	0.782103
GO_POSITIVE_REGULATION_OF_UBIQUITIN_DEPENDENT_PROTEIN_CATABOLIC_PROCESS	98	0.301449	1.02602	0.469008	0.781551
GO_RHO_GTPASE_BINDING	156	0.351946	1.02601	0.473896	0.780611
GO_ALPHA_BETA_T_CELL_PROLIFERATION	35	0.449962	1.02555	0.485714	0.780685
GO_GDP_DISSOCIATION_INHIBITOR_ACTIVITY	16	0.399081	1.02521	0.456842	0.780473
GO_LYMPHOCYTE_CHEMOTAXIS	63	0.430568	1.02499	0.46493	0.780016
GO_SYNAPTIC_VESICLE_RECYCLING	74	0.31836	1.02495	0.436403	0.779116
GO_RNA_INTERFERENCE	17	0.388247	1.02454	0.45733	0.779098
GO_NEGATIVE_REGULATION_OF_CHOLESTEROL_EFFLUX	20	0.37706	1.02429	0.447942	0.778703
GO_POSITIVE_REGULATION_OF_MYELOID_LEUKOCYTE_CYTOKINE_PRODUCTION_INVOLVED_IN_IMMUNE_RESPONSE	19	0.422042	1.02309	0.445564	0.780367
GO_PORE_COMPLEX_ASSEMBLY	19	0.407652	1.02208	0.472837	0.781641
GO_PROTEIN_LOCALIZATION_TO_GOLGI_APPARATUS	27	0.380134	1.02203	0.499051	0.780777
GO_RNA_CAP_BINDING	18	0.379756	1.02132	0.468951	0.781336
GO_POSITIVE_REGULATION_OF_CHROMOSOME_ORGANIZATION	174	0.304171	1.02086	0.498998	0.781377
GO_COATED_VESICLE_MEMBRANE	177	0.29284	1.02065	0.460526	0.780901
GO_PURINE_CONTAINING_COMPOUND_SALVAGE	15	0.376665	1.02022	0.473469	0.780846
GO_CELL_ADHESION_MEDIATED_BY_INTEGRIN	67	0.392415	1.01982	0.458753	0.780711
GO_CELLULAR_METABOLIC_COMPOUND_SALVAGE	32	0.328124	1.01952	0.46281	0.780435
GO_REGULATION_OF_KERATINOCYTE_DIFFERENTIATION	42	0.351081	1.0194	0.432071	0.779795
GO_RECEPTOR_BIOSYNTHETIC_PROCESS	28	0.348467	1.01901	0.427957	0.779647
GO_POSITIVE_REGULATION_OF_REGULATED_SECRETORY_PATHWAY	55	0.315741	1.01898	0.442697	0.77876
GO_RESPONSE_TO_RADIATION	429	0.287607	1.01883	0.465066	0.778123
GO_ACTIVATION_OF_NF_KAPPAB_INDUCING_KINASE_ACTIVITY	17	0.416039	1.01863	0.471579	0.777623
GO_NEGATIVE_REGULATION_OF_UBIQUITIN_DEPENDENT_PROTEIN_CATABOLIC_PROCESS	47	0.31269	1.01841	0.476578	0.777214
GO_SIGNAL_TRANSDUCTION_IN_ABSENCE_OF_LIGAND	74	0.309974	1.0183	0.474249	0.776614
GO_PEPTIDE_ANTIGEN_BINDING	30	0.490227	1.01792	0.498952	0.77652
GO_POSITIVE_REGULATION_OF_INTERLEUKIN_4_PRODUCTION	24	0.453463	1.01758	0.485537	0.776289
GO_DEFENSE_RESPONSE_TO_VIRUS	248	0.330622	1.01675	0.474645	0.777026
GO_REGULATION_OF_EXTRINSIC_APOPTOTIC_SIGNALING_PATHWAY_VIA_DEATH_DOMAIN_RECEPTORS	61	0.336715	1.01659	0.449791	0.77645
GO_MRNA_5_UTR_BINDING	26	0.346273	1.01651	0.462025	0.775687
GO_CCR_CHEMOKINE_RECEPTOR_BINDING	41	0.439826	1.01625	0.47505	0.775284
GO_POSITIVE_REGULATION_OF_PROTEIN_MODIFICATION_BY_SMALL_PROTEIN_CONJUGATION_OR_REMOVAL	132	0.311151	1.01622	0.475538	0.774409
GO_POSITIVE_REGULATION_OF_MACROAUTOPHAGY	65	0.349908	1.01603	0.47929	0.77388
GO_RACEMASE_AND_EPIMERASE_ACTIVITY	16	0.390093	1.0157	0.452756	0.773688
GO_REGULATION_OF_PROTEASOMAL_UBIQUITIN_DEPENDENT_PROTEIN_CATABOLIC_PROCESS	126	0.307767	1.01553	0.469388	0.773138
GO_NEGATIVE_REGULATION_OF_UBIQUITIN_PROTEIN_TRANSFERASE_ACTIVITY	16	0.387191	1.0155	0.49	0.772292
GO_ACUTE_INFLAMMATORY_RESPONSE	110	0.339688	1.01542	0.426573	0.771555
GO_REGULATION_OF_EPIDERMAL_CELL_DIFFERENTIATION	62	0.342439	1.01525	0.451111	0.771036
GO_RIBOSOMAL_SMALL_SUBUNIT_BIOGENESIS	69	0.358108	1.01432	0.505725	0.772153
GO_NEGATIVE_REGULATION_OF_PROTEIN_MODIFICATION_BY_SMALL_PROTEIN_CONJUGATION_OR_REMOVAL	87	0.295117	1.01343	0.465863	0.77316
GO_MEMBRANE_LIPID_METABOLIC_PROCESS	198	0.27054	1.01326	0.454158	0.772634
GO_POSITIVE_REGULATION_OF_DEFENSE_RESPONSE	374	0.315496	1.01271	0.462687	0.77288
GO_POSITIVE_REGULATION_OF_AMYLOID_PRECURSOR_PROTEIN_CATABOLIC_PROCESS	24	0.350642	1.01266	0.452138	0.772097
GO_NEUTROPHIL_MIGRATION	117	0.374559	1.01227	0.45738	0.772035
GO_PYRIMIDINE_CONTAINING_COMPOUND_METABOLIC_PROCESS	81	0.296638	1.01121	0.484211	0.773486
GO_CUL4_RING_E3_UBIQUITIN_LIGASE_COMPLEX	33	0.349315	1.01039	0.487654	0.774399
GO_KILLING_OF_CELLS_OF_OTHER_ORGANISM	63	0.308456	1.01016	0.420213	0.774024
GO_LATE_ENDOSOME_TO_VACUOLE_TRANSPORT	24	0.373196	1.01014	0.501946	0.773165
GO_GTP_METABOLIC_PROCESS	24	0.330392	1.01013	0.479532	0.772279
GO_CENTROSOME_DUPLICATION	66	0.380245	1.00974	0.535497	0.772226
GO_CERAMIDE_BIOSYNTHETIC_PROCESS	64	0.29508	1.00916	0.428571	0.772643
GO_NEGATIVE_REGULATION_OF_CYTOKINE_BIOSYNTHETIC_PROCESS	20	0.398318	1.00912	0.446121	0.771822
GO_APICOLATERAL_PLASMA_MEMBRANE	19	0.411414	1.00848	0.477459	0.772268
GO_REGULATION_OF_MACROAUTOPHAGY	171	0.314444	1.00819	0.501961	0.77204
GO_MICROTUBULE_BINDING	252	0.312243	1.00765	0.478351	0.772247
GO_VESICLE_DOCKING	65	0.298799	1.00728	0.460722	0.772181
GO_ANTIGEN_PROCESSING_AND_PRESENTATION_OF_PEPTIDE_ANTIGEN_VIA_MHC_CLASS_I	99	0.323373	1.00698	0.483101	0.771908
GO_LOCOMOTOR_RHYTHM	15	0.373544	1.00668	0.461101	0.771658
GO_PROTEIN_PHOSPHATASE_BINDING	147	0.293978	1.00655	0.483871	0.771069
GO_RESPONSE_TO_VIRUS	337	0.317698	1.00643	0.477642	0.770416
GO_REGULATION_OF_ERBB_SIGNALING_PATHWAY	95	0.310107	1.00641	0.472165	0.769585
GO_CELLULAR_RESPONSE_TO_UV	78	0.325364	1.00591	0.493042	0.769819
GO_REGULATION_OF_INTRINSIC_APOPTOTIC_SIGNALING_PATHWAY_IN_RESPONSE_TO_DNA_DAMAGE	37	0.329566	1.00553	0.493014	0.76973
GO_VIRAL_GENE_EXPRESSION	192	0.314893	1.00543	0.521073	0.769123
GO_POSITIVE_REGULATION_OF_RESPONSE_TO_BIOTIC_STIMULUS	245	0.312018	1.00482	0.48203	0.769458
GO_ATP_DEPENDENT_MICROTUBULE_MOTOR_ACTIVITY_PLUS_END_DIRECTED	16	0.419142	1.00474	0.465447	0.768748
GO_RESPONSE_TO_MURAMYL_DIPEPTIDE	18	0.423851	1.00462	0.473373	0.768099
GO_NEGATIVE_REGULATION_OF_OXIDATIVE_STRESS_INDUCED_INTRINSIC_APOPTOTIC_SIGNALING_PATHWAY	18	0.330683	1.00362	0.44246	0.769379
GO_CULLIN_RING_UBIQUITIN_LIGASE_COMPLEX	156	0.310319	1.0033	0.502994	0.769172
GO_PYRIMIDINE_NUCLEOSIDE_TRIPHOSPHATE_BIOSYNTHETIC_PROCESS	19	0.372174	1.00304	0.492784	0.768918
GO_METHYL_CPG_BINDING	24	0.347837	1.00301	0.470716	0.768092
GO_VESICLE_COAT	54	0.321293	1.00265	0.486381	0.767995
GO_NEGATIVE_REGULATION_OF_CELLULAR_RESPONSE_TO_VASCULAR_ENDOTHELIAL_GROWTH_FACTOR_STIMULUS	20	0.370176	1.00241	0.446184	0.767642
GO_POSITIVE_REGULATION_OF_INFLAMMATORY_RESPONSE	152	0.345578	1.00061	0.475891	0.770598
GO_PYRIMIDINE_NUCLEOSIDE_TRIPHOSPHATE_METABOLIC_PROCESS	22	0.360835	0.999882	0.482546	0.771293
GO_CELLULAR_RESPONSE_TO_NUTRIENT	44	0.32764	0.999622	0.491489	0.770917
GO_INTRINSIC_APOPTOTIC_SIGNALING_PATHWAY_IN_RESPONSE_TO_ENDOPLASMIC_RETICULUM_STRESS	59	0.279216	0.999503	0.479393	0.770275
GO_REGULATION_OF_VENTRICULAR_CARDIAC_MUSCLE_CELL_ACTION_POTENTIAL	18	0.401485	0.999322	0.472332	0.769767
GO_EARLY_ENDOSOME_MEMBRANE	152	0.294045	0.999115	0.467505	0.769365
GO_CELL_KILLING	168	0.341794	0.998543	0.467249	0.769752
GO_PEPTIDYL_LYSINE_DIMETHYLATION	21	0.36995	0.998266	0.497845	0.769426
GO_PYRIMIDINE_DEOXYRIBONUCLEOTIDE_METABOLIC_PROCESS	18	0.36353	0.998235	0.479253	0.768624
GO_NEUTROPHIL_CHEMOTAXIS	98	0.379877	0.998235	0.47551	0.767761
GO_RECEPTOR_CATABOLIC_PROCESS	34	0.3552	0.998131	0.495885	0.767133
GO_REGULATION_OF_MICROTUBULE_CYTOSKELETON_ORGANIZATION	184	0.319595	0.997862	0.498965	0.766837
GO_NEGATIVE_REGULATION_OF_PROTEASOMAL_UBIQUITIN_DEPENDENT_PROTEIN_CATABOLIC_PROCESS	34	0.326508	0.997494	0.492662	0.766749
GO_PLACENTA_DEVELOPMENT	155	0.288686	0.997488	0.493724	0.7659
GO_VACUOLAR_MEMBRANE	403	0.275472	0.997166	0.478702	0.765676
GO_NEGATIVE_REGULATION_OF_LYMPHOCYTE_ACTIVATION	150	0.352244	0.995713	0.488753	0.767792
GO_EXOCYTIC_PROCESS	82	0.28014	0.995619	0.460385	0.767124
GO_MATURATION_OF_SSU_RRNA_FROM_TRICISTRONIC_RRNA_TRANSCRIPT_SSU_RRNA_5_8S_RRNA_LSU_RRNA	35	0.364787	0.995469	0.512524	0.766566
GO_UBIQUITIN_PROTEIN_TRANSFERASE_REGULATOR_ACTIVITY	18	0.356561	0.994588	0.506494	0.767555
GO_REGULATION_OF_CELLULAR_RESPIRATION	29	0.320012	0.994485	0.467213	0.766946
GO_POSITIVE_REGULATION_OF_ALPHA_BETA_T_CELL_ACTIVATION	63	0.404351	0.994472	0.511022	0.766134
GO_REGULATION_OF_PROTEIN_MODIFICATION_BY_SMALL_PROTEIN_CONJUGATION_OR_REMOVAL	228	0.294266	0.993978	0.487078	0.766356
GO_TRANSPORT_VESICLE_MEMBRANE	200	0.257962	0.99318	0.454955	0.76723
GO_NEGATIVE_REGULATION_OF_LEUKOCYTE_CELL_CELL_ADHESION	133	0.346433	0.991573	0.497925	0.769772
GO_POSITIVE_REGULATION_OF_ACTIN_FILAMENT_POLYMERIZATION	93	0.287623	0.991315	0.47619	0.769441
GO_PYRIMIDINE_NUCLEOTIDE_BIOSYNTHETIC_PROCESS	30	0.333348	0.991179	0.486762	0.768926
GO_REGULATION_OF_UBIQUITIN_DEPENDENT_PROTEIN_CATABOLIC_PROCESS	154	0.290118	0.991003	0.497934	0.768479
GO_CELL_DIFFERENTIATION_INVOLVED_IN_EMBRYONIC_PLACENTA_DEVELOPMENT	26	0.377729	0.990848	0.488518	0.76796
GO_REGULATION_OF_MEMBRANE_LIPID_DISTRIBUTION	50	0.346666	0.990087	0.484513	0.768759
GO_PROTEIN_O_LINKED_GLYCOSYLATION	96	0.307	0.989862	0.478652	0.768362
GO_ESTABLISHMENT_OF_PROTEIN_LOCALIZATION_TO_VACUOLE	52	0.323167	0.988257	0.518367	0.770926
GO_NEGATIVE_REGULATION_OF_NERVOUS_SYSTEM_PROCESS	27	0.345915	0.988215	0.464602	0.770189
GO_ESTABLISHMENT_OF_PIGMENT_GRANULE_LOCALIZATION	24	0.357881	0.988073	0.482328	0.769622
GO_HEPATOCYTE_DIFFERENTIATION	15	0.367787	0.987728	0.461728	0.76951
GO_EXONUCLEASE_ACTIVITY_ACTIVE_WITH_EITHER_RIBO_OR_DEOXYRIBONUCLEIC_ACIDS_AND_PRODUCING_5_PHOSPHOMONOESTERS	57	0.342839	0.987623	0.522727	0.768907
GO_NEGATIVE_REGULATION_OF_EXTRINSIC_APOPTOTIC_SIGNALING_PATHWAY	106	0.303117	0.987502	0.476293	0.768303
GO_REGULATION_OF_ACTIN_NUCLEATION	29	0.320773	0.987388	0.496788	0.7677
GO_POSITIVE_REGULATION_OF_NITRIC_OXIDE_SYNTHASE_ACTIVITY	22	0.359815	0.987154	0.5	0.767343
GO_POSITIVE_REGULATION_OF_GLIAL_CELL_PROLIFERATION	19	0.40296	0.986152	0.498986	0.768613
GO_NEGATIVE_REGULATION_OF_TELOMERE_MAINTENANCE_VIA_TELOMERE_LENGTHENING	25	0.373677	0.985984	0.532787	0.768127
GO_PHOSPHATIDYLINOSITOL_ACYL_CHAIN_REMODELING	17	0.366304	0.985652	0.486284	0.767929
GO_CENTRIOLE_ASSEMBLY	38	0.393553	0.985307	0.534654	0.767825
GO_REGULATION_OF_EPIDERMIS_DEVELOPMENT	87	0.320205	0.985047	0.4946	0.76752
GO_LYTIC_VACUOLE_ORGANIZATION	64	0.293355	0.984993	0.474645	0.766806
GO_U2_SNRNP	23	0.351058	0.984765	0.482558	0.766493
GO_BLASTODERM_SEGMENTATION	19	0.3671	0.984666	0.469758	0.765881
GO_APOPTOTIC_CELL_CLEARANCE	50	0.369811	0.983842	0.48203	0.766787
GO_SNORNA_BINDING	30	0.351547	0.983809	0.510397	0.766033
GO_POSITIVE_REGULATION_OF_PROTEOLYSIS_INVOLVED_IN_CELLULAR_PROTEIN_CATABOLIC_PROCESS	121	0.287637	0.983752	0.5	0.765316
GO_CELL_DEATH_IN_RESPONSE_TO_HYDROGEN_PEROXIDE	33	0.319779	0.9832	0.505703	0.765614
GO_T_CELL_PROLIFERATION	191	0.364746	0.983043	0.507337	0.765104
GO_PSEUDOPODIUM_ORGANIZATION	16	0.415048	0.982688	0.509165	0.765039
GO_ESTABLISHMENT_OF_CELL_POLARITY	137	0.314952	0.982469	0.501018	0.764667
GO_FILAMENTOUS_ACTIN	32	0.342897	0.981804	0.476793	0.765223
GO_POSITIVE_REGULATION_OF_EPIDERMIS_DEVELOPMENT	40	0.338417	0.981661	0.484211	0.764708
GO_REGULATION_OF_CD4_POSITIVE_ALPHA_BETA_T_CELL_ACTIVATION	62	0.392924	0.981498	0.518443	0.764241
GO_CELLULAR_RESPONSE_TO_ATP	18	0.370708	0.981286	0.480932	0.763904
GO_LONG_CHAIN_FATTY_ACID_METABOLIC_PROCESS	112	0.281558	0.98123	0.490476	0.763233
GO_REGULATION_OF_GENE_EXPRESSION_EPIGENETIC	143	0.308152	0.980401	0.544898	0.764074
GO_DETECTION_OF_STIMULUS_INVOLVED_IN_SENSORY_PERCEPTION_OF_PAIN	24	0.341408	0.979885	0.504808	0.764368
GO_REGULATION_OF_T_HELPER_17_TYPE_IMMUNE_RESPONSE	22	0.433975	0.979645	0.515337	0.764094
GO_PROTEIN_ADP_RIBOSYLASE_ACTIVITY	16	0.421324	0.979269	0.535573	0.764088
GO_REGULATION_OF_PROTEIN_LOCALIZATION_TO_NUCLEUS	125	0.277022	0.979165	0.492662	0.763517
GO_RIBOSOMAL_LARGE_SUBUNIT_BIOGENESIS	71	0.33323	0.97909	0.533981	0.762848
GO_REGULATION_OF_DEFENSE_RESPONSE_TO_VIRUS	71	0.352279	0.978859	0.503043	0.76253
GO_MATURATION_OF_LSU_RRNA	27	0.392187	0.978682	0.564639	0.762076
GO_RRNA_CATABOLIC_PROCESS	20	0.342414	0.978669	0.51927	0.761301
GO_RESPONSE_TO_PROTOZOAN	27	0.429804	0.978149	0.5	0.761636
GO_REGULATION_OF_CIRCADIAN_RHYTHM	120	0.274828	0.977688	0.486726	0.761753
GO_PARTURITION	16	0.396752	0.977548	0.503371	0.761251
GO_INTERFERON_GAMMA_PRODUCTION	112	0.385897	0.977212	0.515658	0.76112
GO_RETROGRADE_TRANSPORT_ENDOSOME_TO_PLASMA_MEMBRANE	22	0.360935	0.977211	0.521739	0.760319
GO_E_BOX_BINDING	50	0.299314	0.976847	0.510843	0.760311
GO_NEGATIVE_REGULATION_OF_VIRAL_PROCESS	100	0.313865	0.974364	0.513458	0.764642
GO_NEGATIVE_REGULATION_OF_LIPID_STORAGE	22	0.376884	0.974276	0.504525	0.76405
GO_LYSOPHOSPHOLIPID_ACYLTRANSFERASE_ACTIVITY	18	0.360204	0.974106	0.541494	0.763588
GO_REGULATION_OF_ENDOPLASMIC_RETICULUM_STRESS_INDUCED_INTRINSIC_APOPTOTIC_SIGNALING_PATHWAY	30	0.29164	0.972426	0.4846	0.766234
GO_REGULATION_OF_TYPE_2_IMMUNE_RESPONSE	31	0.389001	0.972143	0.502994	0.766065
GO_NUCLEAR_LOCALIZATION_SEQUENCE_BINDING	26	0.340381	0.972059	0.52988	0.765448
GO_VESICLE_CYTOSKELETAL_TRAFFICKING	72	0.306764	0.970564	0.490722	0.767814
GO_PIGMENT_GRANULE_LOCALIZATION	26	0.346793	0.970136	0.510331	0.767897
GO_CELLULAR_PIGMENTATION	52	0.30828	0.969692	0.535354	0.768015
GO_GRANULOCYTE_MACROPHAGE_COLONY_STIMULATING_FACTOR_PRODUCTION	16	0.444132	0.969197	0.53178	0.768294
GO_KINASE_REGULATOR_ACTIVITY	203	0.286036	0.968091	0.50308	0.769668
GO_NUCLEOID	40	0.32469	0.968063	0.536	0.768937
GO_NEGATIVE_REGULATION_OF_APOPTOTIC_SIGNALING_PATHWAY	228	0.262813	0.967454	0.501066	0.769427
GO_NEGATIVE_REGULATION_OF_AUTOPHAGY	82	0.299924	0.967013	0.519916	0.769487
GO_REGULATION_OF_KERATINOCYTE_PROLIFERATION	39	0.361375	0.966749	0.507559	0.769199
GO_GROWTH_FACTOR_RECEPTOR_BINDING	139	0.298257	0.966398	0.502392	0.769119
GO_NEUTRAL_AMINO_ACID_TRANSMEMBRANE_TRANSPORTER_ACTIVITY	34	0.316864	0.965899	0.491647	0.769339
GO_MATURATION_OF_5_8S_RRNA	35	0.370072	0.965096	0.573643	0.770181
GO_NEGATIVE_REGULATION_OF_VIRAL_RELEASE_FROM_HOST_CELL	15	0.38998	0.965093	0.537374	0.769388
GO_GLIAL_CELL_ACTIVATION	58	0.387077	0.96509	0.530043	0.768599
GO_REGULATION_OF_LYMPHOCYTE_APOPTOTIC_PROCESS	56	0.33831	0.965068	0.514644	0.767863
GO_POSITIVE_REGULATION_OF_TUMOR_NECROSIS_FACTOR_SUPERFAMILY_CYTOKINE_PRODUCTION	92	0.354153	0.964988	0.517241	0.767238
GO_GRANULOCYTE_CHEMOTAXIS	120	0.354999	0.964446	0.476578	0.767694
GO_INTERFERON_BETA_PRODUCTION	49	0.347128	0.964423	0.540323	0.766972
GO_INTRINSIC_COMPONENT_OF_ENDOPLASMIC_RETICULUM_MEMBRANE	154	0.282608	0.964316	0.529175	0.766386
GO_NEGATIVE_REGULATION_OF_RESPONSE_TO_REACTIVE_OXYGEN_SPECIES	22	0.35327	0.964205	0.516765	0.765843
GO_NEGATIVE_REGULATION_OF_DNA_METABOLIC_PROCESS	107	0.302143	0.964201	0.516949	0.76507
GO_REGULATION_OF_CIRCADIAN_SLEEP_WAKE_CYCLE_SLEEP	18	0.363204	0.963985	0.503896	0.764772
GO_POSITIVE_REGULATION_OF_PROTEIN_TARGETING_TO_MITOCHONDRION	32	0.332632	0.96285	0.520958	0.766314
GO_POSITIVE_REGULATION_OF_INTRINSIC_APOPTOTIC_SIGNALING_PATHWAY	58	0.27761	0.9621	0.52	0.767017
GO_AMINOPEPTIDASE_ACTIVITY	43	0.298872	0.961702	0.525751	0.767099
GO_REGULATION_OF_PROTEIN_MATURATION	66	0.284239	0.961681	0.512529	0.766377
GO_FILOPODIUM_MEMBRANE	18	0.381419	0.961659	0.513238	0.765651
GO_POSITIVE_REGULATION_OF_GRANULOCYTE_CHEMOTAXIS	28	0.386158	0.961432	0.512146	0.765348
GO_OOGENESIS	82	0.284844	0.961386	0.52	0.764684
GO_MODULATION_BY_VIRUS_OF_HOST_PROCESS	29	0.327565	0.960912	0.54661	0.765004
GO_POSITIVE_REGULATION_OF_DNA_BIOSYNTHETIC_PROCESS	69	0.306585	0.960578	0.54224	0.764915
GO_PHOSPHATIDYLINOSITOL_BINDING	252	0.28548	0.959636	0.534884	0.766016
GO_DECIDUALIZATION	25	0.335578	0.959206	0.512448	0.76613
GO_MESENCHYMAL_TO_EPITHELIAL_TRANSITION	20	0.347943	0.959012	0.520642	0.76575
GO_REGULATION_OF_DENDRITIC_SPINE_MORPHOGENESIS	47	0.341694	0.958506	0.511247	0.766061
GO_OLIGOSACCHARIDE_BIOSYNTHETIC_PROCESS	17	0.349762	0.958269	0.487288	0.765753
GO_MULTIVESICULAR_BODY_ORGANIZATION	31	0.347171	0.958211	0.55706	0.765092
GO_REGULATION_OF_TRANSLATIONAL_FIDELITY	15	0.380456	0.957987	0.577465	0.764794
GO_HYDROLASE_ACTIVITY_HYDROLYZING_O_GLYCOSYL_COMPOUNDS	89	0.252905	0.95788	0.484185	0.764252
GO_LEUKOCYTE_MEDIATED_CYTOTOXICITY	106	0.372756	0.956788	0.538462	0.765697
GO_POSITIVE_REGULATION_OF_ORGANELLE_ASSEMBLY	67	0.318632	0.956773	0.537074	0.764964
GO_AUTOPHAGOSOME	95	0.293409	0.956704	0.551515	0.764347
GO_ENAMEL_MINERALIZATION	15	0.376149	0.956317	0.511879	0.764318
GO_MHC_CLASS_II_PROTEIN_COMPLEX_BINDING	16	0.467401	0.956077	0.555328	0.764016
GO_RESPONSE_TO_TUMOR_NECROSIS_FACTOR	308	0.280868	0.955866	0.535565	0.763664
GO_UNSATURATED_FATTY_ACID_BIOSYNTHETIC_PROCESS	57	0.315322	0.955852	0.523908	0.762939
GO_SOMATIC_DIVERSIFICATION_OF_IMMUNE_RECEPTORS	70	0.34559	0.955636	0.546584	0.762587
GO_GRANULOCYTE_MIGRATION	143	0.343826	0.954783	0.5	0.763473
GO_ENDOPEPTIDASE_ACTIVITY	430	0.257727	0.954546	0.567308	0.763176
GO_LABYRINTHINE_LAYER_BLOOD_VESSEL_DEVELOPMENT	20	0.344646	0.954114	0.519751	0.763376
GO_REGULATION_OF_EARLY_ENDOSOME_TO_LATE_ENDOSOME_TRANSPORT	17	0.395213	0.952702	0.568317	0.76537
GO_CORE_PROMOTER_SEQUENCE_SPECIFIC_DNA_BINDING	42	0.332686	0.950804	0.568589	0.768383
GO_REGULATION_OF_CARDIAC_MUSCLE_CELL_ACTION_POTENTIAL	33	0.342593	0.950744	0.536688	0.767769
GO_NEGATIVE_REGULATION_OF_CD4_POSITIVE_ALPHA_BETA_T_CELL_DIFFERENTIATION	21	0.407303	0.95034	0.56778	0.76782
GO_NEGATIVE_REGULATION_OF_CD4_POSITIVE_ALPHA_BETA_T_CELL_ACTIVATION	30	0.375621	0.95032	0.549296	0.767101
GO_PHOSPHATASE_BINDING	192	0.27351	0.950283	0.526316	0.766422
GO_ACTIVATION_OF_MAPKK_ACTIVITY	50	0.327505	0.950116	0.54918	0.766007
GO_EXTRINSIC_APOPTOTIC_SIGNALING_PATHWAY_VIA_DEATH_DOMAIN_RECEPTORS	87	0.298954	0.949477	0.514344	0.766554
GO_COATED_VESICLE	290	0.26057	0.948842	0.523605	0.767128
GO_NEGATIVE_REGULATION_OF_STRESS_ACTIVATED_PROTEIN_KINASE_SIGNALING_CASCADE	49	0.306449	0.948724	0.527054	0.766605
GO_IMMUNOGLOBULIN_PRODUCTION_INVOLVED_IN_IMMUNOGLOBULIN_MEDIATED_IMMUNE_RESPONSE	55	0.365496	0.948391	0.543434	0.766537
GO_PROTEIN_LOCALIZATION_TO_MICROTUBULE_ORGANIZING_CENTER	33	0.378752	0.948153	0.55668	0.76628
GO_DENDRITIC_SPINE_MORPHOGENESIS	61	0.325642	0.948049	0.518672	0.765754
GO_VESICLE_MEDIATED_TRANSPORT_BETWEEN_ENDOSOMAL_COMPARTMENTS	41	0.347876	0.94794	0.577075	0.765193
GO_POSITIVE_REGULATION_OF_LEUKOCYTE_DEGRANULATION	25	0.355299	0.947521	0.539095	0.765301
GO_HETEROCHROMATIN_ORGANIZATION	49	0.336353	0.946492	0.564682	0.76659
GO_COCHLEA_MORPHOGENESIS	24	0.358778	0.946278	0.521186	0.766221
GO_NUCLEOTIDE_BINDING_DOMAIN_LEUCINE_RICH_REPEAT_CONTAINING_RECEPTOR_SIGNALING_PATHWAY	36	0.356774	0.946209	0.551657	0.765596
GO_RIBOSOMAL_SMALL_SUBUNIT_ASSEMBLY	18	0.365	0.945757	0.55	0.76575
GO_PRESYNAPTIC_ENDOCYTOSIS	62	0.304759	0.944684	0.525974	0.767234
GO_CELLULAR_RESPONSE_TO_NITRIC_OXIDE	15	0.31013	0.944401	0.533333	0.767068
GO_CALCIUM_DEPENDENT_PHOSPHOLIPASE_A2_ACTIVITY	16	0.359191	0.944123	0.527778	0.766816
GO_NEGATIVE_REGULATION_OF_INNATE_IMMUNE_RESPONSE	61	0.333528	0.943749	0.544277	0.766831
GO_NEGATIVE_REGULATION_OF_TELOMERE_MAINTENANCE	34	0.358029	0.94284	0.602823	0.767923
GO_CELLULAR_RESPONSE_TO_GAMMA_RADIATION	28	0.323649	0.942731	0.54672	0.767402
GO_FIBROBLAST_APOPTOTIC_PROCESS	23	0.370542	0.942608	0.582809	0.766901
GO_EPIDERMAL_GROWTH_FACTOR_RECEPTOR_SIGNALING_PATHWAY	120	0.292733	0.942515	0.52621	0.766314
GO_RUFFLE_ASSEMBLY	42	0.311209	0.942318	0.545073	0.765958
GO_REGULATION_OF_APOPTOTIC_SIGNALING_PATHWAY	401	0.250834	0.941944	0.538302	0.765935
GO_REGULATION_OF_NUCLEASE_ACTIVITY	22	0.351986	0.941495	0.546748	0.766194
GO_ECTODERM_DEVELOPMENT	22	0.348952	0.941373	0.524752	0.765657
GO_SYNCYTIUM_FORMATION	55	0.302439	0.941362	0.516509	0.764942
GO_ALPHA_AMINO_ACID_BIOSYNTHETIC_PROCESS	64	0.280387	0.941334	0.545259	0.76425
GO_EPIBOLY	31	0.340394	0.940933	0.543033	0.764376
GO_MITOCHONDRIAL_FISSION	39	0.320007	0.940918	0.545455	0.763671
GO_PATTERN_RECOGNITION_RECEPTOR_SIGNALING_PATHWAY	194	0.304319	0.94081	0.536998	0.763161
GO_REGULATION_OF_LEUKOCYTE_DEGRANULATION	46	0.3649	0.940313	0.546778	0.763522
GO_CELLULAR_RESPONSE_TO_HYDROGEN_PEROXIDE	99	0.277215	0.940306	0.52834	0.762801
GO_HYPOTHALAMUS_DEVELOPMENT	21	0.305692	0.940231	0.545455	0.762193
GO_INTERLEUKIN_6_PRODUCTION	165	0.315775	0.939721	0.516194	0.762464
GO_NEURAL_NUCLEUS_DEVELOPMENT	59	0.245963	0.939333	0.554455	0.762479
GO_REGULATION_OF_NUCLEAR_CELL_CYCLE_DNA_REPLICATION	17	0.376637	0.938843	0.547131	0.762692
GO_POSITIVE_REGULATION_OF_CYTOKINE_PRODUCTION	450	0.314539	0.93826	0.54661	0.763175
GO_PHAGOCYTIC_VESICLE	138	0.30662	0.938082	0.543388	0.762799
GO_NEGATIVE_REGULATION_OF_CELL_MATRIX_ADHESION	41	0.349647	0.937129	0.531621	0.764126
GO_HAIR_FOLLICLE_MATURATION	16	0.365945	0.937107	0.548319	0.763437
GO_CIRCADIAN_REGULATION_OF_GENE_EXPRESSION	64	0.30724	0.936694	0.55144	0.763552
GO_POSITIVE_REGULATION_OF_CALCINEURIN_MEDIATED_SIGNALING	15	0.334907	0.936693	0.537246	0.762829
GO_REGULATION_OF_ADAPTIVE_IMMUNE_RESPONSE	160	0.350888	0.936615	0.559184	0.762283
GO_POLY_A_BINDING	23	0.346045	0.936474	0.561866	0.761837
GO_ACUTE_PHASE_RESPONSE	47	0.330612	0.936262	0.496368	0.761558
GO_REGULATION_OF_PHOSPHOLIPID_BIOSYNTHETIC_PROCESS	19	0.325194	0.935688	0.525581	0.761961
GO_PROTEIN_MODIFICATION_BY_SMALL_PROTEIN_REMOVAL	288	0.296676	0.935595	0.574	0.761455
GO_DETECTION_OF_MECHANICAL_STIMULUS_INVOLVED_IN_SENSORY_PERCEPTION	28	0.328072	0.934645	0.539474	0.762555
GO_MODULATION_BY_SYMBIONT_OF_HOST_PROCESS	38	0.313984	0.933955	0.570824	0.763165
GO_MACROPHAGE_ACTIVATION	97	0.338481	0.933704	0.535417	0.762924
GO_RAB_GTPASE_BINDING	168	0.30409	0.933476	0.569937	0.762631
GO_TRANSLATION_FACTOR_ACTIVITY_RNA_BINDING	80	0.277346	0.933241	0.552063	0.762373
GO_ENDODERMAL_CELL_DIFFERENTIATION	45	0.333798	0.932145	0.522727	0.763735
GO_ENDOPLASMIC_RETICULUM_GOLGI_INTERMEDIATE_COMPARTMENT	126	0.267764	0.931974	0.566802	0.763351
GO_HOMOPHILIC_CELL_ADHESION_VIA_PLASMA_MEMBRANE_ADHESION_MOLECULES	164	0.313989	0.931885	0.530892	0.762827
GO_NEGATIVE_REGULATION_OF_VIRAL_LIFE_CYCLE	82	0.308272	0.931766	0.550725	0.762336
GO_SERINE_PHOSPHORYLATION_OF_STAT_PROTEIN	27	0.328064	0.931061	0.553846	0.763026
GO_CORTICAL_ACTIN_CYTOSKELETON	79	0.289935	0.930866	0.561822	0.762759
GO_SWI_SNF_COMPLEX	17	0.353933	0.930817	0.560086	0.762149
GO_ERBB_SIGNALING_PATHWAY	141	0.279546	0.930692	0.539554	0.761675
GO_POSITIVE_REGULATION_OF_TYPE_I_INTERFERON_PRODUCTION	71	0.310361	0.929929	0.559838	0.762438
GO_LIPOPROTEIN_CATABOLIC_PROCESS	15	0.347297	0.929551	0.557484	0.762343
GO_MICROTUBULE_PLUS_END	23	0.352497	0.929493	0.559671	0.761839
GO_TRANSLATION_ELONGATION_FACTOR_ACTIVITY	18	0.310196	0.929327	0.545082	0.761453
GO_MITOCHONDRIAL_MEMBRANE_ORGANIZATION	117	0.248165	0.929206	0.545455	0.761
GO_LEUKOCYTE_MIGRATION_INVOLVED_IN_INFLAMMATORY_RESPONSE	16	0.458534	0.9291	0.553606	0.760471
GO_PHOSPHATIDYLINOSITOL_MONOPHOSPHATE_PHOSPHATASE_ACTIVITY	18	0.427505	0.928912	0.609562	0.760142
GO_PLACENTA_BLOOD_VESSEL_DEVELOPMENT	34	0.320251	0.92867	0.532416	0.75991
GO_REGULATION_OF_POSTTRANSCRIPTIONAL_GENE_SILENCING	88	0.299032	0.928641	0.6	0.759263
GO_NEGATIVE_REGULATION_OF_CELL_MORPHOGENESIS_INVOLVED_IN_DIFFERENTIATION	96	0.30525	0.928569	0.555319	0.758723
GO_STRUCTURAL_CONSTITUENT_OF_NUCLEAR_PORE	27	0.371519	0.928392	0.599206	0.758378
GO_PHOSPHOPROTEIN_BINDING	85	0.299081	0.928382	0.552361	0.757699
GO_GANGLIOSIDE_METABOLIC_PROCESS	22	0.32599	0.928302	0.550976	0.757147
GO_FIBRONECTIN_BINDING	26	0.384187	0.928208	0.540275	0.756628
GO_CHROMATIN_DNA_BINDING	89	0.275176	0.928073	0.58022	0.756181
GO_NUCLEAR_INNER_MEMBRANE	55	0.289416	0.927406	0.558296	0.756708
GO_LAMELLIPODIUM_MEMBRANE	22	0.369948	0.92729	0.553719	0.756207
GO_POSITIVE_REGULATION_OF_INTERFERON_ALPHA_PRODUCTION	20	0.396984	0.927265	0.58215	0.755578
GO_CELLULAR_RESPONSE_TO_EXTRACELLULAR_STIMULUS	243	0.261463	0.926997	0.541053	0.755427
GO_DEOXYRIBONUCLEOSIDE_TRIPHOSPHATE_METABOLIC_PROCESS	17	0.34623	0.926482	0.556863	0.755762
GO_RRNA_CONTAINING_RIBONUCLEOPROTEIN_COMPLEX_EXPORT_FROM_NUCLEUS	15	0.386933	0.92623	0.6	0.755536
GO_REGULATION_OF_ALPHA_BETA_T_CELL_DIFFERENTIATION	64	0.360038	0.926059	0.55332	0.755168
GO_TYPE_I_INTERFERON_PRODUCTION	121	0.310791	0.926058	0.549898	0.754479
GO_NEGATIVE_REGULATION_OF_VIRAL_GENOME_REPLICATION	57	0.334474	0.925963	0.551102	0.754
GO_MYELIN_SHEATH	46	0.292812	0.925191	0.567511	0.754804
GO_POSITIVE_REGULATION_OF_T_CELL_PROLIFERATION	100	0.38029	0.925038	0.572895	0.754443
GO_HYDROLASE_ACTIVITY_ACTING_ON_GLYCOSYL_BONDS	126	0.245287	0.924139	0.546988	0.755563
GO_POSITIVE_REGULATION_OF_MAST_CELL_ACTIVATION	21	0.342754	0.923924	0.570455	0.755351
GO_NEGATIVE_REGULATION_OF_TELOMERE_MAINTENANCE_VIA_TELOMERASE	18	0.366026	0.92329	0.588957	0.755838
GO_GLUCOSE_6_PHOSPHATE_METABOLIC_PROCESS	25	0.290985	0.923076	0.545861	0.75561
GO_INTEGRIN_MEDIATED_SIGNALING_PATHWAY	102	0.33018	0.922517	0.576923	0.755993
GO_POSITIVE_REGULATION_OF_INNATE_IMMUNE_RESPONSE	208	0.290591	0.922501	0.557652	0.755339
GO_REGULATION_OF_SYMBIOTIC_PROCESS	225	0.26491	0.922435	0.550725	0.754794
GO_MEMBRANE_LIPID_BIOSYNTHETIC_PROCESS	134	0.264509	0.92231	0.557987	0.754314
GO_NEGATIVE_REGULATION_OF_MRNA_PROCESSING	31	0.342645	0.922258	0.587891	0.753762
GO_LONG_CHAIN_FATTY_ACYL_COA_BIOSYNTHETIC_PROCESS	17	0.331816	0.922131	0.556962	0.75332
GO_POSITIVE_REGULATION_OF_INTERLEUKIN_1_PRODUCTION	57	0.364916	0.921989	0.544555	0.752928
GO_MICROTUBULE_DEPOLYMERIZATION	44	0.337419	0.921806	0.582627	0.752586
GO_GERM_CELL_NUCLEUS	16	0.358094	0.921581	0.562077	0.75234
GO_CELLULAR_RESPONSE_TO_LIGHT_STIMULUS	123	0.259329	0.921257	0.563991	0.752277
GO_REGULATION_OF_RESPIRATORY_BURST	16	0.374432	0.921165	0.549474	0.751756
GO_REGULATION_OF_VIRAL_LIFE_CYCLE	151	0.277693	0.92087	0.562105	0.751653
GO_NEGATIVE_REGULATION_OF_VIRAL_TRANSCRIPTION	27	0.332415	0.919272	0.578629	0.754119
GO_TRANS_GOLGI_NETWORK	225	0.271567	0.919266	0.533333	0.753456
GO_PROTEIN_LOCALIZATION_TO_CYTOSKELETON	57	0.327975	0.919143	0.59127	0.753022
GO_PEPTIDYL_THREONINE_DEPHOSPHORYLATION	22	0.368374	0.91833	0.6	0.753918
GO_NUCLEOTIDYLTRANSFERASE_ACTIVITY	115	0.27431	0.918162	0.552419	0.753621
GO_INNATE_IMMUNE_RESPONSE_ACTIVATING_SIGNAL_TRANSDUCTION	116	0.264989	0.918036	0.562363	0.753214
GO_ASTROCYTE_ACTIVATION	26	0.35511	0.917212	0.577586	0.753958
GO_DNA_DEALKYLATION	33	0.305216	0.916922	0.554192	0.753862
GO_POSITIVE_REGULATION_OF_HISTONE_H3_K4_METHYLATION	18	0.329738	0.916566	0.568465	0.753862
GO_TYPE_2_IMMUNE_RESPONSE	39	0.353325	0.916457	0.582	0.753414
GO_AGGRESOME	38	0.293728	0.916445	0.580448	0.752767
GO_NEGATIVE_REGULATION_OF_DEFENSE_RESPONSE_TO_VIRUS	22	0.338757	0.915561	0.561368	0.753733
GO_CEREBELLAR_PURKINJE_CELL_LAYER_MORPHOGENESIS	15	0.370568	0.915129	0.591111	0.753934
GO_ANOIKIS	33	0.32218	0.914886	0.57438	0.753752
GO_MITOCHONDRION_MORPHOGENESIS	22	0.319157	0.914713	0.582205	0.753417
GO_MONOCYTE_CHEMOTAXIS	64	0.36903	0.9145	0.552419	0.753125
GO_INACTIVATION_OF_MAPK_ACTIVITY	26	0.349676	0.914401	0.564583	0.752657
GO_NEGATIVE_REGULATION_OF_SYNAPSE_ORGANIZATION	25	0.318072	0.91311	0.591647	0.754373
GO_ACTIVATION_OF_PROTEIN_KINASE_ACTIVITY	325	0.274344	0.913104	0.583878	0.753715
GO_POSITIVE_REGULATION_OF_PRODUCTION_OF_MOLECULAR_MEDIATOR_OF_IMMUNE_RESPONSE	93	0.332243	0.912481	0.584711	0.754235
GO_TELOMERIC_DNA_BINDING	35	0.327118	0.912366	0.597959	0.753813
GO_RESPONSE_TO_FUNGUS	54	0.304864	0.912213	0.565517	0.753438
GO_TRANSLATIONAL_INITIATION	190	0.270013	0.911987	0.582846	0.753222
GO_POSITIVE_REGULATION_OF_NEUTROPHIL_MIGRATION	30	0.373379	0.911972	0.55754	0.752596
GO_POSITIVE_REGULATION_OF_ESTABLISHMENT_OF_PROTEIN_LOCALIZATION	393	0.249306	0.911596	0.58296	0.752679
GO_TRANSCRIPTION_ELONGATION_FACTOR_COMPLEX	47	0.34198	0.911318	0.610338	0.752568
GO_MODULATION_OF_EXCITATORY_POSTSYNAPTIC_POTENTIAL	45	0.305335	0.911242	0.612676	0.752045
GO_MUSCLE_CELL_CELLULAR_HOMEOSTASIS	19	0.315631	0.911231	0.579327	0.751411
GO_DNA_DEMETHYLATION	27	0.318819	0.910608	0.549495	0.751927
GO_REGULATION_OF_OXIDATIVE_STRESS_INDUCED_CELL_DEATH	74	0.266382	0.910423	0.565762	0.751625
GO_CELLULAR_RESPONSE_TO_REACTIVE_NITROGEN_SPECIES	18	0.288826	0.91028	0.573333	0.751251
GO_ESTABLISHMENT_OF_PLANAR_POLARITY_INVOLVED_IN_NEURAL_TUBE_CLOSURE	15	0.383571	0.909888	0.586956	0.751376
GO_NEGATIVE_REGULATION_OF_NEUROINFLAMMATORY_RESPONSE	18	0.382048	0.909822	0.58351	0.750852
GO_HYDROLASE_ACTIVITY_ACTING_ON_CARBON_NITROGEN_BUT_NOT_PEPTIDE_BONDS_IN_CYCLIC_AMIDINES	34	0.310604	0.909335	0.569507	0.751129
GO_REGULATION_OF_HISTONE_METHYLATION	63	0.294899	0.908972	0.593684	0.751164
GO_POLYUBIQUITIN_MODIFICATION_DEPENDENT_PROTEIN_BINDING	44	0.315435	0.908546	0.586558	0.751291
GO_ALPHA_BETA_T_CELL_ACTIVATION_INVOLVED_IN_IMMUNE_RESPONSE	63	0.370109	0.908477	0.590726	0.750775
GO_PROTEIN_AUTOUBIQUITINATION	70	0.287694	0.908254	0.576065	0.750543
GO_RESPIRATORY_BURST	34	0.389763	0.907841	0.564948	0.750681
GO_KINASE_ACTIVATOR_ACTIVITY	87	0.282562	0.907483	0.566316	0.750774
GO_RIBONUCLEOPROTEIN_COMPLEX_BINDING	126	0.274246	0.906934	0.574627	0.751084
GO_PROTEIN_NITROSYLATION	16	0.350322	0.906877	0.560254	0.750532
GO_MONOVALENT_INORGANIC_ANION_HOMEOSTASIS	26	0.294724	0.906848	0.601064	0.74994
GO_PROTEIN_LOCALIZATION_TO_MITOCHONDRION	138	0.2503	0.905941	0.559289	0.751023
GO_MACROAUTOPHAGY	298	0.276943	0.905744	0.590998	0.750711
GO_MATURATION_OF_5_8S_RRNA_FROM_TRICISTRONIC_RRNA_TRANSCRIPT_SSU_RRNA_5_8S_RRNA_LSU_RRNA	25	0.358075	0.9057	0.637081	0.750162
GO_RAC_PROTEIN_SIGNAL_TRANSDUCTION	37	0.334528	0.905533	0.584158	0.749837
GO_DYNEIN_COMPLEX_BINDING	20	0.363457	0.905431	0.587755	0.749391
GO_DNA_METHYLATION_OR_DEMETHYLATION	94	0.266252	0.905284	0.592166	0.74904
GO_HISTONE_H3_ACETYLATION	58	0.30541	0.905191	0.590726	0.748602
GO_PHOSPHATIDYLSERINE_BINDING	56	0.297515	0.904785	0.592677	0.748738
GO_POSITIVE_REGULATION_OF_CELLULAR_PROTEIN_CATABOLIC_PROCESS	143	0.264616	0.904618	0.581109	0.748402
GO_POSTSYNAPTIC_DENSITY_INTRACELLULAR_COMPONENT	17	0.329712	0.904224	0.568345	0.748546
GO_POSITIVE_REGULATION_OF_CYTOKINE_PRODUCTION_INVOLVED_IN_IMMUNE_RESPONSE	54	0.35234	0.903677	0.572874	0.748877
GO_ACTIVATED_T_CELL_PROLIFERATION	46	0.339207	0.903424	0.592132	0.748741
GO_RESPONSE_TO_INTERLEUKIN_1	206	0.276184	0.903262	0.574786	0.748376
GO_MICROTUBULE	418	0.271788	0.902951	0.595388	0.748394
GO_REGULATION_OF_ARP2_3_COMPLEX_MEDIATED_ACTIN_NUCLEATION	20	0.320871	0.902486	0.586558	0.74862
GO_REGULATION_OF_CELL_SHAPE	151	0.287892	0.902035	0.561224	0.748764
GO_POSITIVE_REGULATION_OF_MONOCYTE_CHEMOTAXIS	19	0.375212	0.901239	0.573499	0.749583
GO_OXIDOREDUCTASE_ACTIVITY_ACTING_ON_THE_CH_NH_GROUP_OF_DONORS_NAD_OR_NADP_AS_ACCEPTOR	16	0.36208	0.901117	0.580931	0.749234
GO_REGULATION_OF_DENDRITE_EXTENSION	24	0.308372	0.900963	0.595855	0.748889
GO_RETINOIC_ACID_RECEPTOR_BINDING	27	0.313648	0.90061	0.589744	0.748937
GO_POSITIVE_REGULATION_OF_LEUKOCYTE_MEDIATED_IMMUNITY	130	0.342749	0.900498	0.599174	0.748488
GO_INTERMEDIATE_FILAMENT_BASED_PROCESS	50	0.29316	0.900475	0.555556	0.747896
GO_NEURON_PROJECTION_ORGANIZATION	91	0.284072	0.900355	0.569296	0.74749
GO_POSITIVE_REGULATION_OF_MRNA_METABOLIC_PROCESS	81	0.277943	0.90028	0.596311	0.746986
GO_CELLULAR_SENESCENCE	75	0.277842	0.900233	0.565385	0.746437
GO_NUCLEOSIDE_METABOLIC_PROCESS	99	0.250873	0.900106	0.564155	0.74602
GO_MODULATION_BY_VIRUS_OF_HOST_CELLULAR_PROCESS	19	0.320306	0.899728	0.580838	0.746088
GO_TOLL_LIKE_RECEPTOR_4_SIGNALING_PATHWAY	39	0.348768	0.899471	0.580376	0.745962
GO_POSITIVE_REGULATION_OF_VIRAL_PROCESS	105	0.274127	0.898386	0.590385	0.747232
GO_PROTEIN_SERINE_THREONINE_TYROSINE_KINASE_ACTIVITY	45	0.300233	0.898327	0.595436	0.746715
GO_NEGATIVE_REGULATION_OF_RHO_PROTEIN_SIGNAL_TRANSDUCTION	21	0.374149	0.897943	0.590099	0.74685
GO_CARBOXY_TERMINAL_DOMAIN_PROTEIN_KINASE_COMPLEX	20	0.371056	0.897738	0.629907	0.74665
GO_RESPONSE_TO_DEXAMETHASONE	41	0.299276	0.896638	0.585202	0.748176
GO_CELL_CELL_ADHESION_VIA_PLASMA_MEMBRANE_ADHESION_MOLECULES	270	0.282747	0.896299	0.553288	0.748296
GO_NUCLEAR_PORE	83	0.292305	0.896246	0.593626	0.747747
GO_ENDODEOXYRIBONUCLEASE_ACTIVITY_PRODUCING_5_PHOSPHOMONOESTERS	17	0.371042	0.895565	0.590164	0.748326
GO_ANTIGEN_PROCESSING_AND_PRESENTATION_OF_EXOGENOUS_PEPTIDE_ANTIGEN_VIA_MHC_CLASS_I	80	0.30057	0.895452	0.589744	0.74792
GO_REGULATION_OF_GONAD_DEVELOPMENT	20	0.300539	0.895405	0.61573	0.747373
GO_CD4_POSITIVE_ALPHA_BETA_T_CELL_DIFFERENTIATION	78	0.357322	0.895381	0.611336	0.746785
GO_TUMOR_NECROSIS_FACTOR_RECEPTOR_SUPERFAMILY_BINDING	46	0.344447	0.895163	0.596774	0.74657
GO_SULFURIC_ESTER_HYDROLASE_ACTIVITY	16	0.358519	0.893511	0.59408	0.748994
GO_POSITIVE_REGULATION_OF_TELOMERASE_RNA_LOCALIZATION_TO_CAJAL_BODY	15	0.387286	0.892732	0.63197	0.749795
GO_PHOSPHOLIPASE_A2_ACTIVITY_CONSUMING_1_2_DIPALMITOYLPHOSPHATIDYLCHOLINE	20	0.313979	0.892703	0.603491	0.749211
GO_CELLULAR_RESPONSE_TO_HEAT	120	0.28207	0.892459	0.588235	0.749052
GO_H4_HISTONE_ACETYLTRANSFERASE_ACTIVITY	17	0.371945	0.891895	0.648594	0.749488
GO_POLYSOME	68	0.262878	0.891848	0.6	0.748939
GO_POSITIVE_REGULATION_OF_PLASMA_MEMBRANE_BOUNDED_CELL_PROJECTION_ASSEMBLY	96	0.282402	0.891749	0.604508	0.748504
GO_PROTEIN_FOLDING_CHAPERONE	27	0.271867	0.891653	0.577963	0.748044
GO_POSITIVE_REGULATION_OF_PROTEOLYSIS	356	0.253157	0.891598	0.574194	0.747501
GO_BASEMENT_MEMBRANE_ORGANIZATION	30	0.329489	0.891336	0.59	0.747373
GO_NEGATIVE_REGULATION_OF_MICROTUBULE_POLYMERIZATION_OR_DEPOLYMERIZATION	37	0.322824	0.891003	0.6125	0.74737
GO_POSITIVE_REGULATION_OF_CYCLIN_DEPENDENT_PROTEIN_KINASE_ACTIVITY	35	0.309326	0.890882	0.622718	0.746968
GO_NEGATIVE_REGULATION_OF_RESPONSE_TO_OXIDATIVE_STRESS	57	0.264858	0.889659	0.5762	0.748628
GO_POSITIVE_REGULATION_OF_PEPTIDYL_TYROSINE_PHOSPHORYLATION	193	0.282281	0.889429	0.595238	0.748393
GO_CHEMOKINE_PRODUCTION	93	0.313632	0.88938	0.578838	0.747844
GO_ENDODERM_FORMATION	54	0.314742	0.889229	0.576842	0.747526
GO_REGION_OF_CYTOSOL	25	0.317695	0.889161	0.606452	0.74703
GO_PRESYNAPTIC_ACTIVE_ZONE_CYTOPLASMIC_COMPONENT	15	0.350221	0.888919	0.600897	0.746879
GO_NEGATIVE_REGULATION_OF_EXTRINSIC_APOPTOTIC_SIGNALING_PATHWAY_VIA_DEATH_DOMAIN_RECEPTORS	41	0.304753	0.888521	0.581498	0.747082
GO_REGULATION_OF_ATP_BIOSYNTHETIC_PROCESS	17	0.29161	0.888474	0.613095	0.746559
GO_DEFENSE_RESPONSE_TO_GRAM_POSITIVE_BACTERIUM	90	0.298642	0.888233	0.577342	0.746419
GO_REGULATION_OF_DEFENSE_RESPONSE_TO_VIRUS_BY_HOST	37	0.353125	0.888233	0.60575	0.745813
GO_REGULATION_OF_CHROMATIN_BINDING	21	0.334955	0.888214	0.59798	0.745229
GO_REGULATION_OF_MICROTUBULE_BASED_PROCESS	232	0.265402	0.888147	0.581053	0.744716
GO_GOLGI_TO_ENDOSOME_TRANSPORT	15	0.37462	0.887549	0.634051	0.745158
GO_RECYCLING_ENDOSOME_MEMBRANE	83	0.274124	0.88689	0.590062	0.745841
GO_MODIFICATION_DEPENDENT_PROTEIN_BINDING	145	0.301326	0.886882	0.625755	0.745242
GO_REGULATION_OF_RESPONSE_TO_TUMOR_CELL	15	0.382998	0.885934	0.600849	0.746305
GO_NEGATIVE_REGULATION_OF_POSTTRANSCRIPTIONAL_GENE_SILENCING	22	0.293051	0.88592	0.638298	0.745721
GO_NURD_COMPLEX	15	0.361811	0.885528	0.619342	0.745842
GO_PROTEIN_COMPLEX_INVOLVED_IN_CELL_ADHESION	36	0.378517	0.885352	0.580838	0.745528
GO_CYSTEINE_TYPE_ENDOPEPTIDASE_INHIBITOR_ACTIVITY	59	0.275637	0.885236	0.604598	0.745139
GO_TOLL_LIKE_RECEPTOR_SIGNALING_PATHWAY	150	0.295575	0.885119	0.597015	0.744758
GO_NUCLEAR_ENVELOPE	450	0.254971	0.885069	0.600823	0.744227
GO_MATERNAL_PROCESS_INVOLVED_IN_FEMALE_PREGNANCY	64	0.26901	0.884988	0.60177	0.743762
GO_REGULATION_OF_PROTEIN_CATABOLIC_PROCESS	385	0.243652	0.884697	0.595529	0.743662
GO_SPLEEN_DEVELOPMENT	34	0.298658	0.884476	0.617117	0.743423
GO_PYRIMIDINE_NUCLEOTIDE_METABOLIC_PROCESS	45	0.280487	0.883996	0.608163	0.743722
GO_NEGATIVE_REGULATION_OF_MRNA_SPLICING_VIA_SPLICEOSOME	22	0.329303	0.883257	0.626923	0.744393
GO_NUCLEAR_RECEPTOR_TRANSCRIPTION_COACTIVATOR_ACTIVITY	54	0.3099	0.883083	0.607803	0.744083
GO_TRANSCRIPTION_REPRESSOR_COMPLEX	75	0.288048	0.882617	0.609808	0.74433
GO_ENDOSOME_MEMBRANE	484	0.245504	0.882113	0.592213	0.744635
GO_PROTEIN_LOCALIZATION_TO_LYSOSOME	42	0.283427	0.881807	0.622129	0.744564
GO_LOW_DENSITY_LIPOPROTEIN_RECEPTOR_PARTICLE_METABOLIC_PROCESS	23	0.279319	0.881706	0.603325	0.744182
GO_AP_TYPE_MEMBRANE_COAT_ADAPTOR_COMPLEX	39	0.304713	0.881669	0.613281	0.743661
GO_SMALL_GTPASE_BINDING	415	0.279476	0.881392	0.597938	0.743527
GO_PHOSPHATIDYLCHOLINE_ACYL_CHAIN_REMODELING	28	0.2931	0.880964	0.641827	0.743686
GO_REPRODUCTIVE_SYSTEM_DEVELOPMENT	443	0.252188	0.880867	0.608108	0.743262
GO_ENDORIBONUCLEASE_ACTIVITY_PRODUCING_5_PHOSPHOMONOESTERS	29	0.307583	0.880794	0.599165	0.742788
GO_EMBRYONIC_PLACENTA_DEVELOPMENT	88	0.277605	0.879534	0.603774	0.744497
GO_RESPONSE_TO_UV_B	17	0.333589	0.879149	0.615538	0.74459
GO_INTERLEUKIN_2_PRODUCTION	54	0.346265	0.878934	0.610766	0.744405
GO_MEMBRANE_COAT	91	0.272963	0.878373	0.610236	0.74487
GO_POSITIVE_REGULATION_OF_EPIDERMAL_CELL_DIFFERENTIATION	25	0.321113	0.878078	0.651261	0.744898
GO_REGULATION_OF_PROTEIN_LOCALIZATION_TO_CELL_PERIPHERY	121	0.2513	0.878009	0.578616	0.744412
GO_POSITIVE_REGULATION_OF_MYELOID_LEUKOCYTE_MEDIATED_IMMUNITY	34	0.332732	0.877769	0.608787	0.744331
GO_TRANSFERASE_ACTIVITY_TRANSFERRING_ACYL_GROUPS	248	0.23664	0.877277	0.605321	0.744732
GO_NEGATIVE_REGULATION_OF_T_CELL_RECEPTOR_SIGNALING_PATHWAY	23	0.360721	0.876867	0.62268	0.744929
GO_PHAGOSOME_MATURATION	48	0.265545	0.876842	0.591579	0.744377
GO_REGULATION_OF_GRANULOCYTE_DIFFERENTIATION	15	0.369848	0.876786	0.59919	0.743888
GO_POSITIVE_REGULATION_OF_T_CELL_CYTOKINE_PRODUCTION	20	0.380879	0.876713	0.61477	0.743439
GO_REGULATION_OF_T_CELL_CYTOKINE_PRODUCTION	32	0.349571	0.876597	0.583984	0.743079
GO_CENTRIOLAR_SATELLITE	91	0.283801	0.876187	0.611465	0.743147
GO_PERINUCLEAR_ENDOPLASMIC_RETICULUM	22	0.288589	0.875958	0.635747	0.742974
GO_LYMPHOCYTE_ACTIVATION_INVOLVED_IN_IMMUNE_RESPONSE	181	0.316767	0.875401	0.610236	0.743404
GO_PROTEIN_K63_LINKED_UBIQUITINATION	56	0.269484	0.875385	0.601578	0.742843
GO_GLYCOLIPID_CATABOLIC_PROCESS	17	0.281495	0.874157	0.616205	0.744579
GO_RIBONUCLEOSIDE_MONOPHOSPHATE_METABOLIC_PROCESS	49	0.273834	0.874118	0.615538	0.74405
GO_NUCLEOSIDE_CATABOLIC_PROCESS	31	0.298914	0.874113	0.618844	0.743477
GO_REGULATION_OF_CHROMATIN_ORGANIZATION	180	0.258618	0.873736	0.601215	0.743509
GO_REGULATION_OF_VIRAL_GENOME_REPLICATION	95	0.280354	0.873626	0.609856	0.743133
GO_PROTEIN_TARGETING_TO_VACUOLE	40	0.335535	0.873042	0.645669	0.743641
GO_POSITIVE_REGULATION_OF_IMMUNE_EFFECTOR_PROCESS	213	0.316659	0.872919	0.632353	0.743246
GO_POSITIVE_REGULATION_OF_G1_S_TRANSITION_OF_MITOTIC_CELL_CYCLE	49	0.277109	0.87286	0.611554	0.742759
GO_LOW_DENSITY_LIPOPROTEIN_PARTICLE_CLEARANCE	42	0.248768	0.872472	0.640703	0.742889
GO_MAP_KINASE_KINASE_KINASE_ACTIVITY	22	0.345976	0.872338	0.649193	0.74252
GO_CEREBELLAR_PURKINJE_CELL_LAYER_DEVELOPMENT	25	0.290017	0.871985	0.625592	0.742533
GO_REGULATION_OF_PLATELET_DERIVED_GROWTH_FACTOR_RECEPTOR_SIGNALING_PATHWAY	24	0.330102	0.871805	0.598726	0.742263
GO_GANGLION_DEVELOPMENT	16	0.351878	0.87179	0.588362	0.741709
GO_MRNA_CLEAVAGE_AND_POLYADENYLATION_SPECIFICITY_FACTOR_COMPLEX	18	0.349079	0.871775	0.640316	0.741154
GO_RETINAL_GANGLION_CELL_AXON_GUIDANCE	20	0.328239	0.871442	0.640662	0.741218
GO_DNA_METHYLATION	70	0.260801	0.870899	0.648837	0.741631
GO_REGULATION_OF_HISTONE_MODIFICATION	145	0.256789	0.870846	0.589958	0.74115
GO_ACTIN_FILAMENT_BUNDLE	68	0.289763	0.870241	0.592357	0.741677
GO_REGULATION_OF_CD8_POSITIVE_ALPHA_BETA_T_CELL_ACTIVATION	17	0.401215	0.869911	0.625251	0.741655
GO_POLY_PURINE_TRACT_BINDING	29	0.318908	0.86979	0.65121	0.741282
GO_RNA_HELICASE_ACTIVITY	76	0.291076	0.869158	0.656522	0.741852
GO_NEGATIVE_REGULATION_OF_MEIOTIC_CELL_CYCLE	16	0.333183	0.86911	0.648889	0.741358
GO_NEGATIVE_REGULATION_OF_ADAPTIVE_IMMUNE_RESPONSE	48	0.340752	0.868809	0.627049	0.741317
GO_CELLULAR_RESPONSE_TO_MOLECULE_OF_BACTERIAL_ORIGIN	218	0.295905	0.868771	0.592827	0.740802
GO_INTERACTION_WITH_SYMBIONT	92	0.248284	0.86848	0.602381	0.740739
GO_POSITIVE_REGULATION_OF_POSTTRANSCRIPTIONAL_GENE_SILENCING	25	0.320525	0.868281	0.607803	0.740544
GO_REGULATION_OF_INFLAMMATORY_RESPONSE	412	0.270686	0.868142	0.590234	0.740263
GO_INTERLEUKIN_7_MEDIATED_SIGNALING_PATHWAY	17	0.344574	0.867824	0.614583	0.740284
GO_CLATHRIN_COAT_OF_COATED_PIT	16	0.322114	0.867627	0.612524	0.740069
GO_NEGATIVE_REGULATION_OF_CELLULAR_SENESCENCE	23	0.32571	0.867526	0.628692	0.739661
GO_REGULATION_OF_RECEPTOR_RECYCLING	22	0.305494	0.866789	0.603896	0.740546
GO_HISTONE_H4_K5_ACETYLATION	16	0.38977	0.866777	0.66474	0.73999
GO_REGULATION_OF_HAIR_CYCLE	29	0.306494	0.86647	0.607456	0.739977
GO_CELLULAR_RESPONSE_TO_BIOTIC_STIMULUS	240	0.286416	0.866436	0.598739	0.739475
GO_POSITIVE_REGULATION_OF_LYMPHOCYTE_DIFFERENTIATION	104	0.331169	0.866107	0.61336	0.739509
GO_POSITIVE_REGULATION_OF_TRANSFORMING_GROWTH_FACTOR_BETA_PRODUCTION	20	0.351984	0.865647	0.598837	0.739811
GO_SIALIC_ACID_BINDING	22	0.382796	0.865506	0.597315	0.739567
GO_PINOCYTOSIS	22	0.30122	0.865306	0.613169	0.739365
GO_RETINOID_X_RECEPTOR_BINDING	18	0.320281	0.865043	0.6	0.739288
GO_REGULATION_OF_INTRACELLULAR_PROTEIN_TRANSPORT	257	0.248821	0.864992	0.621339	0.738816
GO_LENS_MORPHOGENESIS_IN_CAMERA_TYPE_EYE	20	0.314526	0.864191	0.625806	0.739733
GO_POSITIVE_REGULATION_OF_INTERLEUKIN_2_PRODUCTION	26	0.3841	0.864187	0.616601	0.739178
GO_RRNA_TRANSCRIPTION	28	0.322967	0.86416	0.643002	0.738655
GO_METALLOPEPTIDASE_ACTIVITY	182	0.258809	0.864009	0.615741	0.738402
GO_CONNECTIVE_TISSUE_REPLACEMENT	20	0.339104	0.863699	0.639556	0.738376
GO_RIBONUCLEOPROTEIN_GRANULE	235	0.247575	0.863675	0.609407	0.737839
GO_NEUROTRANSMITTER_RECEPTOR_INTERNALIZATION	27	0.303163	0.86361	0.630588	0.737399
GO_ER_NUCLEUS_SIGNALING_PATHWAY	50	0.293253	0.862725	0.604697	0.738407
GO_P_BODY	83	0.281908	0.862207	0.63286	0.738822
GO_POSITIVE_REGULATION_OF_LAMELLIPODIUM_ORGANIZATION	31	0.282547	0.862202	0.632035	0.738263
GO_CLATHRIN_COAT_ASSEMBLY	16	0.305456	0.861893	0.638831	0.738247
GO_REGULATION_OF_CELL_PROJECTION_ASSEMBLY	175	0.258323	0.861522	0.621901	0.738376
GO_REGULATION_OF_DNA_TEMPLATED_TRANSCRIPTION_IN_RESPONSE_TO_STRESS	111	0.230607	0.861091	0.602339	0.738562
GO_POSITIVE_REGULATION_OF_INTERFERON_GAMMA_PRODUCTION	64	0.378121	0.860667	0.613779	0.738829
GO_REGULATION_OF_MAST_CELL_ACTIVATION	42	0.315186	0.860633	0.624733	0.73835
GO_MODULATION_BY_SYMBIONT_OF_HOST_CELLULAR_PROCESS	26	0.303967	0.860622	0.651546	0.737812
GO_PROTEIN_N_TERMINUS_BINDING	106	0.241352	0.860262	0.605578	0.737936
GO_KINESIN_BINDING	41	0.297047	0.860027	0.646799	0.73776
GO_MAMMARY_GLAND_EPITHELIUM_DEVELOPMENT	71	0.278154	0.860023	0.632609	0.737209
GO_REGULATION_OF_PEPTIDASE_ACTIVITY	450	0.235897	0.85995	0.618391	0.736775
GO_PROTEIN_SERINE_THREONINE_KINASE_INHIBITOR_ACTIVITY	28	0.299496	0.859936	0.628684	0.736237
GO_REGULATION_OF_EPITHELIAL_TUBE_FORMATION	18	0.346762	0.859851	0.601227	0.735815
GO_POSITIVE_REGULATION_OF_LYMPHOCYTE_MEDIATED_IMMUNITY	98	0.338382	0.859736	0.640404	0.735462
GO_MACROPHAGE_CHEMOTAXIS	40	0.31738	0.859501	0.620902	0.735331
GO_REGULATION_OF_CELL_KILLING	90	0.345759	0.859488	0.627049	0.7348
GO_T_CELL_DIFFERENTIATION_INVOLVED_IN_IMMUNE_RESPONSE	71	0.345571	0.858905	0.633401	0.735233
GO_PHOSPHATIDYLINOSITOL_3_4_5_TRISPHOSPHATE_BINDING	38	0.288994	0.858717	0.607966	0.73504
GO_PYRIMIDINE_NUCLEOSIDE_CATABOLIC_PROCESS	23	0.318874	0.858661	0.631356	0.734554
GO_REGULATION_OF_INNATE_IMMUNE_RESPONSE	300	0.274423	0.857049	0.631915	0.736838
GO_NUCLEOSIDE_TRIPHOSPHATE_BIOSYNTHETIC_PROCESS	61	0.234892	0.856928	0.649485	0.736477
GO_NEGATIVE_REGULATION_OF_PROTEIN_CATABOLIC_PROCESS	128	0.23512	0.856908	0.625263	0.735958
GO_PROTEIN_LOCALIZATION_TO_NUCLEUS	272	0.240626	0.856455	0.627572	0.736201
GO_REGULATION_OF_PHAGOCYTOSIS	95	0.297828	0.856432	0.61194	0.735688
GO_POSITIVE_REGULATION_OF_MITOCHONDRIAL_FISSION	15	0.338624	0.855422	0.621881	0.736981
GO_VACUOLE_ORGANIZATION	168	0.250906	0.855162	0.615385	0.736849
GO_REGULATION_OF_CELLULAR_PROTEIN_CATABOLIC_PROCESS	250	0.238972	0.854668	0.612903	0.737146
GO_PURINE_NUCLEOSIDE_MONOPHOSPHATE_METABOLIC_PROCESS	38	0.275969	0.854212	0.628968	0.737401
GO_POLARIZED_EPITHELIAL_CELL_DIFFERENTIATION	22	0.319604	0.854069	0.653445	0.737111
GO_POSITIVE_REGULATION_OF_SIGNALING_RECEPTOR_ACTIVITY	37	0.318146	0.853884	0.62256	0.7369
GO_TYPE_I_INTERFERON_RECEPTOR_BINDING	17	0.341925	0.85295	0.659677	0.738077
GO_POSITIVE_REGULATION_OF_CELL_CELL_ADHESION	274	0.312753	0.852585	0.620545	0.738229
GO_NEGATIVE_REGULATION_OF_NECROTIC_CELL_DEATH	22	0.296083	0.852386	0.656904	0.738061
GO_RESPONSE_TO_VITAMIN	91	0.250301	0.851888	0.660422	0.7384
GO_REGULATION_OF_OXIDATIVE_STRESS_INDUCED_INTRINSIC_APOPTOTIC_SIGNALING_PATHWAY	26	0.259683	0.85187	0.596838	0.737878
GO_REGULATION_OF_LAMELLIPODIUM_ORGANIZATION	48	0.270452	0.85052	0.655914	0.739818
GO_RESPONSE_TO_NITRIC_OXIDE	19	0.282248	0.850483	0.635762	0.739315
GO_LEUKOCYTE_CELL_CELL_ADHESION	358	0.303854	0.850458	0.627329	0.738803
GO_HEAT_GENERATION	17	0.350155	0.850236	0.679654	0.738645
GO_REGULATION_OF_PEPTIDYL_SERINE_PHOSPHORYLATION_OF_STAT_PROTEIN	23	0.308164	0.850177	0.661157	0.738225
GO_POSITIVE_REGULATION_OF_NEURON_MIGRATION	15	0.374616	0.849632	0.645669	0.738598
GO_INFLAMMATORY_RESPONSE_TO_WOUNDING	15	0.400043	0.849547	0.647525	0.738204
GO_REGULATION_OF_MICROTUBULE_POLYMERIZATION_OR_DEPOLYMERIZATION	80	0.268406	0.847819	0.658174	0.740816
GO_NEGATIVE_REGULATION_OF_CYTOKINE_SECRETION	38	0.302116	0.847551	0.669355	0.740722
GO_CULLIN_FAMILY_PROTEIN_BINDING	23	0.302848	0.847424	0.646035	0.740421
GO_NEGATIVE_REGULATION_OF_MACROPHAGE_ACTIVATION	16	0.374652	0.846908	0.627016	0.740774
GO_HYDROLASE_ACTIVITY_HYDROLYZING_N_GLYCOSYL_COMPOUNDS	34	0.298276	0.846879	0.643606	0.740268
GO_K63_LINKED_POLYUBIQUITIN_MODIFICATION_DEPENDENT_PROTEIN_BINDING	19	0.36561	0.846048	0.660679	0.741213
GO_POSITIVE_REGULATION_OF_PROTEIN_ACETYLATION	44	0.268888	0.845689	0.658103	0.741281
GO_KILLING_OF_CELLS_IN_OTHER_ORGANISM_INVOLVED_IN_SYMBIOTIC_INTERACTION	28	0.303889	0.844447	0.655462	0.74291
GO_POSITIVE_REGULATION_OF_I_KAPPAB_KINASE_NF_KAPPAB_SIGNALING	186	0.282662	0.844281	0.635052	0.742686
GO_LIPID_TRANSLOCATION	44	0.3046	0.844036	0.647826	0.742625
GO_NUCLEOSOME_BINDING	53	0.304296	0.843792	0.666667	0.742495
GO_G_PROTEIN_COUPLED_GLUTAMATE_RECEPTOR_SIGNALING_PATHWAY	15	0.310819	0.842732	0.693976	0.743831
GO_POSITIVE_REGULATION_OF_DEFENSE_RESPONSE_TO_VIRUS_BY_HOST	26	0.34952	0.842649	0.647887	0.743453
GO_CELLULAR_RESPONSE_TO_EXTERNAL_STIMULUS	315	0.24027	0.84245	0.647917	0.74333
GO_ENDONUCLEASE_ACTIVITY	119	0.249919	0.842449	0.637681	0.74279
GO_LYSINE_ACETYLATED_HISTONE_BINDING	22	0.345917	0.842119	0.667339	0.742853
GO_RESPONSE_TO_LIGHT_STIMULUS	309	0.229799	0.841803	0.655702	0.7429
GO_PROTEIN_ACETYLATION	200	0.254402	0.841307	0.654762	0.743244
GO_T_HELPER_17_TYPE_IMMUNE_RESPONSE	31	0.351539	0.841298	0.623742	0.742717
GO_UBIQUITIN_LIGASE_COMPLEX	277	0.2667	0.840642	0.646707	0.743389
GO_COTRANSLATIONAL_PROTEIN_TARGETING_TO_MEMBRANE	102	0.289135	0.840391	0.617143	0.743285
GO_ENDOCYTIC_VESICLE_MEMBRANE	160	0.251382	0.840384	0.638478	0.742753
GO_ORGAN_OR_TISSUE_SPECIFIC_IMMUNE_RESPONSE	32	0.283697	0.839459	0.690998	0.743791
GO_ACTIN_POLYMERIZATION_OR_DEPOLYMERIZATION	207	0.241302	0.839054	0.646694	0.743947
GO_REGULATION_OF_ESTABLISHMENT_OR_MAINTENANCE_OF_CELL_POLARITY	21	0.374997	0.838599	0.659836	0.744143
GO_POSITIVE_REGULATION_OF_MONONUCLEAR_CELL_MIGRATION	25	0.327182	0.838442	0.652695	0.743934
GO_MIDBRAIN_DEVELOPMENT	88	0.2357	0.838295	0.694511	0.743659
GO_3_5_EXONUCLEASE_ACTIVITY	53	0.294205	0.836897	0.654397	0.745537
GO_REGULATION_OF_ORGANELLE_ASSEMBLY	185	0.252015	0.836813	0.642276	0.74514
GO_REGULATION_OF_PROTEASOMAL_PROTEIN_CATABOLIC_PROCESS	184	0.240977	0.8366	0.647177	0.744934
GO_REGULATION_OF_ACUTE_INFLAMMATORY_RESPONSE	48	0.306035	0.836558	0.646316	0.744461
GO_NEGATIVE_REGULATION_OF_CENTROSOME_CYCLE	15	0.345139	0.836539	0.656442	0.743957
GO_REGULATION_OF_TISSUE_REMODELING	91	0.269952	0.836477	0.646939	0.743536
GO_ACETYLTRANSFERASE_ACTIVITY	103	0.25972	0.836362	0.657315	0.743236
GO_POSITIVE_REGULATION_OF_NEUROINFLAMMATORY_RESPONSE	16	0.382668	0.836179	0.668675	0.743067
GO_PIGMENT_GRANULE_ORGANIZATION	28	0.278846	0.836133	0.650206	0.74261
GO_CELLULAR_RESPONSE_TO_PROSTAGLANDIN_E_STIMULUS	16	0.340251	0.835958	0.650526	0.742401
GO_REGULATION_OF_COLLATERAL_SPROUTING	19	0.30878	0.835925	0.704057	0.741922
GO_CELLULAR_RESPONSE_TO_LIPOPROTEIN_PARTICLE_STIMULUS	36	0.297171	0.835411	0.638116	0.742409
GO_NEGATIVE_REGULATION_OF_LYMPHOCYTE_MEDIATED_IMMUNITY	42	0.324239	0.835284	0.633475	0.74212
GO_CELLULAR_RESPONSE_TO_VIRUS	60	0.271951	0.835222	0.622641	0.741768
GO_KERATINOCYTE_MIGRATION	19	0.313699	0.834051	0.657328	0.743357
GO_FORELIMB_MORPHOGENESIS	40	0.294645	0.833904	0.684091	0.743078
GO_REGULATION_OF_LEUKOCYTE_MEDIATED_CYTOTOXICITY	73	0.345518	0.833685	0.649694	0.742938
GO_POSITIVE_REGULATION_OF_RESPONSE_TO_CYTOKINE_STIMULUS	56	0.31092	0.833567	0.665298	0.742603
GO_REGULATION_OF_PATTERN_RECOGNITION_RECEPTOR_SIGNALING_PATHWAY	93	0.290634	0.833413	0.659574	0.742326
GO_REGULATION_OF_MONOCYTE_CHEMOTAXIS	25	0.350257	0.833404	0.642127	0.741817
GO_TRANSCRIPTION_COUPLED_NUCLEOTIDE_EXCISION_REPAIR	73	0.280454	0.833196	0.653704	0.741675
GO_SKELETAL_MUSCLE_TISSUE_REGENERATION	36	0.269673	0.832992	0.685504	0.741498
GO_CELLULAR_RESPONSE_TO_EXOGENOUS_DSRNA	15	0.337256	0.832597	0.646341	0.741642
GO_POLYOL_BIOSYNTHETIC_PROCESS	64	0.26222	0.832372	0.687773	0.741472
GO_TRANSLATION_INITIATION_FACTOR_BINDING	32	0.270732	0.832212	0.637895	0.741222
GO_NEGATIVE_REGULATION_OF_CELLULAR_PROTEIN_CATABOLIC_PROCESS	83	0.231527	0.831793	0.633197	0.741466
GO_PROTEASOME_ACCESSORY_COMPLEX	24	0.339153	0.831659	0.698292	0.741187
GO_NEGATIVE_REGULATION_OF_TOLL_LIKE_RECEPTOR_SIGNALING_PATHWAY	43	0.318398	0.831553	0.665962	0.740835
GO_POSITIVE_REGULATION_OF_CHEMOKINE_PRODUCTION	60	0.302389	0.831258	0.637652	0.74087
GO_REGULATION_OF_EPITHELIAL_CELL_DIFFERENTIATION_INVOLVED_IN_KIDNEY_DEVELOPMENT	19	0.309503	0.830966	0.663415	0.740805
GO_POSITIVE_REGULATION_OF_PROTEIN_CONTAINING_COMPLEX_ASSEMBLY	241	0.240075	0.83057	0.658228	0.740991
GO_POLY_PYRIMIDINE_TRACT_BINDING	29	0.292205	0.830301	0.664683	0.74094
GO_AUTOPHAGOSOME_MEMBRANE	36	0.257542	0.830163	0.672956	0.74064
GO_EPITHELIAL_CELL_CELL_ADHESION	15	0.314724	0.83009	0.665245	0.740254
GO_VIRAL_GENOME_REPLICATION	121	0.256825	0.830027	0.659044	0.739832
GO_POLYSACCHARIDE_BINDING	24	0.28698	0.82977	0.720988	0.739784
GO_REGULATION_OF_RESPONSE_TO_BIOTIC_STIMULUS	397	0.259953	0.829672	0.656051	0.739457
GO_INNATE_IMMUNE_RESPONSE_IN_MUCOSA	17	0.336591	0.82943	0.675	0.739403
GO_POSITIVE_REGULATION_OF_MEMBRANE_POTENTIAL	15	0.286116	0.828939	0.696703	0.739729
GO_CORPUS_CALLOSUM_DEVELOPMENT	20	0.31898	0.828911	0.653021	0.739247
GO_NEGATIVE_REGULATION_OF_CYSTEINE_TYPE_ENDOPEPTIDASE_ACTIVITY	92	0.245208	0.828591	0.680365	0.739427
GO_ACETYLGLUCOSAMINYLTRANSFERASE_ACTIVITY	48	0.277807	0.828557	0.678571	0.73896
GO_T_HELPER_CELL_LINEAGE_COMMITMENT	16	0.404866	0.828413	0.674699	0.738705
GO_POSITIVE_REGULATION_OF_CELLULAR_RESPONSE_TO_TRANSFORMING_GROWTH_FACTOR_BETA_STIMULUS	30	0.291346	0.828343	0.673228	0.738305
GO_PCG_PROTEIN_COMPLEX	46	0.290528	0.828027	0.658436	0.738312
GO_REGULATION_OF_CENTROSOME_DUPLICATION	43	0.30717	0.827282	0.667355	0.739036
GO_REGULATION_OF_LEUKOCYTE_PROLIFERATION	236	0.298972	0.82689	0.651805	0.739234
GO_NEGATIVE_REGULATION_OF_FATTY_ACID_BIOSYNTHETIC_PROCESS	21	0.274821	0.82677	0.697572	0.738919
GO_POSITIVE_REGULATION_OF_PEPTIDE_HORMONE_SECRETION	96	0.226702	0.826607	0.741848	0.7387
GO_LATE_ENDOSOME	263	0.220739	0.82603	0.645833	0.739158
GO_ACTIVATION_OF_CYSTEINE_TYPE_ENDOPEPTIDASE_ACTIVITY_INVOLVED_IN_APOPTOTIC_PROCESS	84	0.2717	0.825726	0.655172	0.739167
GO_PHOSPHATIDYLINOSITOL_PHOSPHATE_KINASE_ACTIVITY	16	0.33437	0.825693	0.659138	0.738706
GO_TOOTH_MINERALIZATION	22	0.309429	0.825063	0.703625	0.739336
GO_FATTY_ACYL_COA_BIOSYNTHETIC_PROCESS	29	0.266327	0.824472	0.660417	0.739838
GO_AUTOPHAGOSOME_ORGANIZATION	96	0.265583	0.824385	0.662745	0.739447
GO_NUCLEOTIDE_RECEPTOR_ACTIVITY	21	0.351156	0.824375	0.656315	0.738954
GO_REGULATION_OF_MYOBLAST_FUSION	20	0.343226	0.824249	0.668269	0.738667
GO_FIBRINOLYSIS	26	0.341447	0.823878	0.664234	0.738762
GO_VESICLE_TRANSPORT_ALONG_MICROTUBULE	46	0.269179	0.823534	0.62963	0.738783
GO_REGULATION_OF_RAC_PROTEIN_SIGNAL_TRANSDUCTION	17	0.323779	0.823303	0.669903	0.738687
GO_CHAPERONE_MEDIATED_AUTOPHAGY	16	0.304276	0.823105	0.686071	0.738504
GO_NUCLEASE_ACTIVITY	198	0.242702	0.82301	0.669388	0.738169
GO_POSITIVE_REGULATION_OF_LEUKOCYTE_CELL_CELL_ADHESION	232	0.315501	0.822774	0.644898	0.738109
GO_ACTIVATION_OF_INNATE_IMMUNE_RESPONSE	140	0.242142	0.821499	0.652542	0.739805
GO_REGULATION_OF_PROTEIN_LOCALIZATION_TO_MEMBRANE	191	0.22838	0.821101	0.650655	0.740058
GO_POSITIVE_REGULATION_BY_HOST_OF_VIRAL_TRANSCRIPTION	17	0.320796	0.821085	0.673114	0.739571
GO_INTERLEUKIN_1_MEDIATED_SIGNALING_PATHWAY	103	0.254716	0.820932	0.633721	0.73939
GO_TOLERANCE_INDUCTION	24	0.392516	0.819718	0.681913	0.740991
GO_POSITIVE_REGULATION_OF_LEUKOCYTE_PROLIFERATION	149	0.305328	0.819617	0.648649	0.740633
GO_LYSOPHOSPHOLIPASE_ACTIVITY	25	0.271874	0.81955	0.675926	0.740247
GO_RNA_CATABOLIC_PROCESS	398	0.225779	0.819485	0.656126	0.739842
GO_VESICLE_LOCALIZATION	222	0.241454	0.818806	0.660532	0.740574
GO_LONG_CHAIN_FATTY_ACYL_COA_METABOLIC_PROCESS	23	0.28404	0.818797	0.665966	0.740083
GO_POSITIVE_REGULATION_OF_RESPONSE_TO_DNA_DAMAGE_STIMULUS	92	0.257689	0.818347	0.669492	0.74035
GO_ORGANELLE_DISASSEMBLY	105	0.248903	0.818233	0.642308	0.740018
GO_PEPTIDASE_ACTIVATOR_ACTIVITY	37	0.296592	0.817559	0.651485	0.740649
GO_MATURATION_OF_LSU_RRNA_FROM_TRICISTRONIC_RRNA_TRANSCRIPT_SSU_RRNA_5_8S_RRNA_LSU_RRNA	15	0.345869	0.817371	0.710173	0.740413
GO_VACUOLAR_ACIDIFICATION	23	0.256519	0.815648	0.68008	0.74284
GO_HETEROTYPIC_CELL_CELL_ADHESION	62	0.298903	0.815335	0.668142	0.742917
GO_POSITIVE_REGULATION_OF_PEPTIDE_SECRETION	221	0.233791	0.815308	0.676538	0.742461
GO_TRANSFERRIN_TRANSPORT	36	0.240828	0.814677	0.704805	0.743083
GO_POSITIVE_REGULATION_OF_EXTRINSIC_APOPTOTIC_SIGNALING_PATHWAY_VIA_DEATH_DOMAIN_RECEPTORS	15	0.341002	0.814457	0.681342	0.742955
GO_REGULATION_OF_CENTRIOLE_REPLICATION	22	0.344232	0.814038	0.671343	0.743272
GO_MEMBRANE_DOCKING	178	0.257888	0.813449	0.679592	0.743807
GO_CD4_POSITIVE_ALPHA_BETA_T_CELL_ACTIVATION	96	0.307064	0.812612	0.672165	0.744785
GO_LOW_DENSITY_LIPOPROTEIN_PARTICLE_RECEPTOR_BINDING	20	0.268337	0.812382	0.710901	0.744707
GO_LEUKOCYTE_PROLIFERATION	309	0.283637	0.811835	0.666667	0.745102
GO_BIOACTIVE_LIPID_RECEPTOR_ACTIVITY	16	0.345215	0.810488	0.686722	0.746928
GO_REGULATION_OF_T_CELL_ACTIVATION	325	0.290991	0.810243	0.659184	0.746869
GO_RESPONSE_TO_MOLECULE_OF_BACTERIAL_ORIGIN	348	0.262658	0.809913	0.644681	0.746945
GO_T_CELL_MIGRATION	65	0.333001	0.809848	0.658915	0.746549
GO_BARBED_END_ACTIN_FILAMENT_CAPPING	21	0.267512	0.809783	0.672	0.746142
GO_REGULATION_OF_GENERATION_OF_PRECURSOR_METABOLITES_AND_ENERGY	150	0.219144	0.809558	0.665198	0.746056
GO_NUCLEAR_EXPORT	202	0.259937	0.808936	0.670476	0.746625
GO_SNAP_RECEPTOR_ACTIVITY	36	0.261445	0.808618	0.647173	0.74663
GO_FEMALE_GENITALIA_DEVELOPMENT	17	0.331948	0.807916	0.688341	0.747394
GO_T_CELL_HOMEOSTASIS	38	0.301617	0.807348	0.703549	0.747915
GO_CYCLIN_DEPENDENT_PROTEIN_KINASE_ACTIVITY	29	0.29821	0.807291	0.683778	0.747535
GO_SECRETORY_GRANULE_LOCALIZATION	15	0.337575	0.806242	0.689218	0.748995
GO_PROTEIN_DESTABILIZATION	48	0.274618	0.805958	0.700205	0.74896
GO_PROTEIN_ACYLATION	244	0.240352	0.804033	0.680723	0.751702
GO_RUFFLE_ORGANIZATION	53	0.267795	0.803772	0.684426	0.751621
GO_LEUKOCYTE_APOPTOTIC_PROCESS	107	0.277634	0.803617	0.670168	0.751396
GO_REGULATION_OF_SUPEROXIDE_METABOLIC_PROCESS	37	0.275957	0.80281	0.690871	0.752298
GO_MAINTENANCE_OF_SYNAPSE_STRUCTURE	16	0.307483	0.802792	0.695464	0.751841
GO_RESPONSE_TO_VITAMIN_D	36	0.268052	0.802698	0.736597	0.751487
GO_POSITIVE_REGULATION_OF_IMMUNOGLOBULIN_PRODUCTION	39	0.304897	0.802127	0.705882	0.751887
GO_REGULATION_OF_CELL_CELL_ADHESION	430	0.269237	0.801845	0.672956	0.751861
GO_DNA_MODIFICATION	116	0.224634	0.800575	0.707207	0.753561
GO_RNA_POLYMERASE_II_TRANSCRIPTION_REGULATOR_COMPLEX	159	0.230379	0.800539	0.69556	0.753104
GO_ORGANELLE_MEMBRANE_CONTACT_SITE	25	0.310737	0.800485	0.684211	0.752706
GO_NATURAL_KILLER_CELL_ACTIVATION_INVOLVED_IN_IMMUNE_RESPONSE	31	0.286657	0.8004	0.697248	0.752364
GO_REGULATION_OF_EXTRINSIC_APOPTOTIC_SIGNALING_PATHWAY	160	0.241483	0.800313	0.678801	0.751995
GO_PROTEIN_LOCALIZATION_TO_VACUOLE	67	0.257245	0.800082	0.675456	0.751866
GO_TRANSFERASE_ACTIVITY_TRANSFERRING_AMINO_ACYL_GROUPS	18	0.297439	0.799899	0.727064	0.751642
GO_LYMPHOCYTE_COSTIMULATION	58	0.333727	0.799824	0.649606	0.751277
GO_INTEGRIN_BINDING	136	0.274126	0.799743	0.65121	0.750901
GO_VESICLE_ORGANIZATION	326	0.225155	0.799623	0.690763	0.750578
GO_CELLULAR_RESPONSE_TO_GONADOTROPIN_STIMULUS	18	0.303701	0.799571	0.681716	0.750171
GO_PHAGOLYSOSOME_ASSEMBLY	15	0.311569	0.798832	0.691406	0.750994
GO_REGULATION_OF_NUCLEOBASE_CONTAINING_COMPOUND_TRANSPORT	19	0.352032	0.798149	0.718391	0.751668
GO_IMMUNE_RESPONSE_TO_TUMOR_CELL	19	0.328643	0.798065	0.697872	0.75131
GO_UBIQUITIN_LIKE_PROTEIN_TRANSFERASE_ACTIVITY	443	0.232587	0.797991	0.684536	0.75092
GO_REGULATION_OF_AUTOPHAGY	338	0.234082	0.797946	0.670659	0.750482
GO_POST_TRANSLATIONAL_PROTEIN_MODIFICATION	356	0.208751	0.797806	0.676724	0.75021
GO_TRANSITION_METAL_ION_TRANSMEMBRANE_TRANSPORTER_ACTIVITY	37	0.259251	0.796779	0.702643	0.751445
GO_MORPHOGENESIS_OF_AN_EPITHELIAL_SHEET	55	0.276828	0.796337	0.667331	0.751731
GO_LYMPHOCYTE_MIGRATION	113	0.318594	0.796317	0.682474	0.751262
GO_RESPONSE_TO_INTERFERON_GAMMA	195	0.279394	0.796094	0.665306	0.751149
GO_POSITIVE_REGULATION_OF_TYROSINE_PHOSPHORYLATION_OF_STAT_PROTEIN	71	0.276412	0.795689	0.716776	0.751286
GO_POSITIVE_REGULATION_OF_CIRCADIAN_RHYTHM	17	0.277297	0.795187	0.765661	0.751622
GO_CYTOSOLIC_RIBOSOME	108	0.254276	0.794867	0.663918	0.751699
GO_POSITIVE_REGULATION_OF_PEPTIDASE_ACTIVITY	195	0.23832	0.794856	0.698276	0.751222
GO_NEGATIVE_REGULATION_OF_ERBB_SIGNALING_PATHWAY	53	0.270181	0.79477	0.687627	0.750845
GO_DISORDERED_DOMAIN_SPECIFIC_BINDING	35	0.26971	0.794357	0.670041	0.751014
GO_REGULATION_OF_CYSTEINE_TYPE_ENDOPEPTIDASE_ACTIVITY	234	0.230619	0.793798	0.689278	0.751436
GO_NEGATIVE_REGULATION_OF_MRNA_METABOLIC_PROCESS	80	0.227875	0.793638	0.680894	0.751252
GO_PHOSPHATIDYLINOSITOL_3_4_BISPHOSPHATE_BINDING	29	0.288039	0.793196	0.729614	0.751487
GO_NUCLEOSIDE_BISPHOSPHATE_BIOSYNTHETIC_PROCESS	64	0.242661	0.792923	0.684524	0.751482
GO_NECROTIC_CELL_DEATH	61	0.241	0.792765	0.720322	0.751235
GO_LEUKOCYTE_CHEMOTAXIS	222	0.279763	0.792749	0.660455	0.750779
GO_VERY_LONG_CHAIN_FATTY_ACID_METABOLIC_PROCESS	30	0.244334	0.791855	0.756696	0.751856
GO_POSITIVE_REGULATION_OF_MACROPHAGE_CHEMOTAXIS	18	0.345073	0.791164	0.698413	0.752519
GO_NEGATIVE_REGULATION_OF_ALPHA_BETA_T_CELL_DIFFERENTIATION	25	0.316855	0.791161	0.724576	0.75203
GO_HISTONE_METHYLTRANSFERASE_COMPLEX	76	0.284889	0.790981	0.707911	0.751826
GO_TRANSCRIPTION_COREPRESSOR_ACTIVITY	187	0.231396	0.790522	0.696099	0.752163
GO_RNA_POLYMERASE_COMPLEX	105	0.256498	0.790059	0.673347	0.752424
GO_REGULATION_OF_ATP_METABOLIC_PROCESS	117	0.21606	0.789515	0.676533	0.752879
GO_UBIQUITIN_BINDING	72	0.263411	0.788878	0.698225	0.753517
GO_POSITIVE_REGULATION_OF_INSULIN_SECRETION_INVOLVED_IN_CELLULAR_RESPONSE_TO_GLUCOSE_STIMULUS	32	0.239218	0.788821	0.741627	0.753156
GO_REGULATION_OF_LEUKOCYTE_MEDIATED_IMMUNITY	202	0.29249	0.788159	0.690229	0.753775
GO_PURINERGIC_NUCLEOTIDE_RECEPTOR_SIGNALING_PATHWAY	32	0.313035	0.787569	0.72949	0.754241
GO_POSITIVE_REGULATION_OF_CELL_KILLING	59	0.333817	0.787265	0.674134	0.754252
GO_REGULATION_OF_PROTEIN_POLYUBIQUITINATION	24	0.284113	0.787217	0.690229	0.753847
GO_POSITIVE_REGULATION_OF_VIRAL_GENOME_REPLICATION	36	0.267202	0.786777	0.676289	0.754091
GO_RESPONSE_TO_ATP	34	0.267225	0.786027	0.745882	0.754809
GO_TUMOR_NECROSIS_FACTOR_RECEPTOR_BINDING	30	0.332955	0.785944	0.699597	0.754462
GO_HISTONE_H4_ACETYLATION	70	0.265585	0.785773	0.690909	0.754279
GO_SPANNING_COMPONENT_OF_MEMBRANE	19	0.309117	0.785397	0.740319	0.754432
GO_PROTEASOMAL_PROTEIN_CATABOLIC_PROCESS	467	0.226706	0.785038	0.687129	0.754548
GO_ATPASE_REGULATOR_ACTIVITY	39	0.251913	0.783994	0.707269	0.755889
GO_ENDONUCLEASE_ACTIVITY_ACTIVE_WITH_EITHER_RIBO_OR_DEOXYRIBONUCLEIC_ACIDS_AND_PRODUCING_5_PHOSPHOMONOESTERS	42	0.266586	0.783776	0.700205	0.755777
GO_REGULATION_OF_VIRAL_TRANSCRIPTION	65	0.24794	0.783674	0.672414	0.755447
GO_OPSONIN_BINDING	15	0.330935	0.783102	0.697517	0.755991
GO_NEGATIVE_REGULATION_OF_IMMUNE_RESPONSE	157	0.264827	0.782805	0.700422	0.755997
GO_POSITIVE_REGULATION_OF_PROTEIN_DEACETYLATION	21	0.279157	0.78277	0.688623	0.755563
GO_REGULATION_OF_HISTONE_H3_K4_METHYLATION	28	0.259052	0.782582	0.710417	0.755413
GO_REGULATION_OF_CELLULAR_RESPONSE_TO_HEAT	76	0.271389	0.782575	0.689655	0.754934
GO_HISTONE_H3_K4_TRIMETHYLATION	18	0.340072	0.782572	0.717842	0.754452
GO_SINGLE_STRANDED_RNA_BINDING	89	0.239518	0.782188	0.661734	0.754624
GO_MODULATION_OF_PROCESS_OF_OTHER_ORGANISM	112	0.218164	0.781766	0.688196	0.754888
GO_MODULATION_BY_SYMBIONT_OF_ENTRY_INTO_HOST	44	0.263928	0.781474	0.688453	0.754892
GO_PROTEIN_HYDROXYLATION	25	0.269693	0.780975	0.705882	0.755271
GO_POSITIVE_REGULATION_OF_NF_KAPPAB_TRANSCRIPTION_FACTOR_ACTIVITY	159	0.253349	0.780749	0.701863	0.755178
GO_CELLULAR_DEFENSE_RESPONSE	52	0.327167	0.779802	0.669422	0.756304
GO_POSITIVE_REGULATION_OF_PROTEIN_CATABOLIC_PROCESS	218	0.225352	0.779432	0.695378	0.75646
GO_NATURAL_KILLER_CELL_ACTIVATION	84	0.277824	0.777402	0.677228	0.759416
GO_DEFENSE_RESPONSE_TO_BACTERIUM	318	0.261934	0.777362	0.69265	0.758988
GO_RESPONSE_TO_CHEMOKINE	94	0.307035	0.777264	0.671488	0.758642
GO_RESPONSE_TO_INTERFERON_ALPHA	20	0.345229	0.777008	0.709611	0.758593
GO_CELLULAR_MODIFIED_AMINO_ACID_BIOSYNTHETIC_PROCESS	48	0.240905	0.776978	0.721277	0.758156
GO_POSITIVE_REGULATION_OF_HISTONE_DEACETYLATION	17	0.30388	0.776903	0.748988	0.757796
GO_RIBONUCLEOSIDE_TRIPHOSPHATE_METABOLIC_PROCESS	63	0.212697	0.776208	0.728916	0.758573
GO_REGULATION_OF_LYMPHOCYTE_MEDIATED_IMMUNITY	146	0.29268	0.775782	0.696099	0.758844
GO_REGULATION_OF_MEMBRANE_PROTEIN_ECTODOMAIN_PROTEOLYSIS	22	0.310143	0.775385	0.708502	0.759059
GO_CELLULAR_RESPONSE_TO_STARVATION	154	0.226873	0.775321	0.691206	0.758695
GO_REGULATION_OF_ALPHA_BETA_T_CELL_ACTIVATION	96	0.299825	0.774737	0.695296	0.759115
GO_POSITIVE_REGULATION_OF_PHAGOCYTOSIS	68	0.29023	0.774492	0.687755	0.759106
GO_RECEPTOR_INHIBITOR_ACTIVITY	40	0.264515	0.773865	0.798365	0.759736
GO_GAMMA_DELTA_T_CELL_ACTIVATION	18	0.350708	0.773594	0.716567	0.759718
GO_NEGATIVE_REGULATION_OF_CELLULAR_CATABOLIC_PROCESS	248	0.206736	0.773442	0.688525	0.759466
GO_CLEAVAGE_INVOLVED_IN_RRNA_PROCESSING	28	0.30254	0.772616	0.740234	0.7604
GO_REGULATION_OF_GRANULOCYTE_CHEMOTAXIS	50	0.294002	0.772164	0.696177	0.760672
GO_THYMUS_DEVELOPMENT	46	0.250098	0.771861	0.737307	0.760726
GO_PHOSPHATIDYLINOSITOL_3_5_BISPHOSPHATE_BINDING	27	0.250375	0.771841	0.72043	0.760285
GO_POSITIVE_REGULATION_OF_B_CELL_MEDIATED_IMMUNITY	33	0.31873	0.77129	0.708249	0.760789
GO_POSITIVE_REGULATION_OF_AUTOPHAGY	127	0.25653	0.770541	0.695565	0.761558
GO_CATION_CATION_ANTIPORTER_ACTIVITY	26	0.271571	0.770497	0.772959	0.761139
GO_REGULATION_OF_PROTEIN_CONTAINING_COMPLEX_ASSEMBLY	422	0.215278	0.770438	0.698312	0.76074
GO_T_CELL_RECEPTOR_SIGNALING_PATHWAY	200	0.267811	0.770343	0.705645	0.760385
GO_CYTOPLASMIC_STRESS_GRANULE	72	0.254154	0.769855	0.704225	0.760832
GO_REGULATION_OF_NEUTROPHIL_CHEMOTAXIS	32	0.316545	0.769456	0.682828	0.760985
GO_NEGATIVE_REGULATION_OF_AXONOGENESIS	69	0.263281	0.768742	0.75705	0.761667
GO_CYTOSOLIC_TRANSPORT	153	0.250794	0.768701	0.712032	0.761246
GO_NEGATIVE_REGULATION_OF_B_CELL_PROLIFERATION	17	0.381397	0.768088	0.711501	0.761811
GO_RNA_EXPORT_FROM_NUCLEUS	142	0.257575	0.767035	0.702448	0.763113
GO_REGULATION_OF_MICROTUBULE_POLYMERIZATION	49	0.245862	0.766531	0.704497	0.763465
GO_COLLATERAL_SPROUTING	26	0.264292	0.765346	0.757238	0.764974
GO_PEROXISOME_PROLIFERATOR_ACTIVATED_RECEPTOR_SIGNALING_PATHWAY	21	0.282803	0.764405	0.772443	0.766137
GO_NEGATIVE_REGULATION_OF_PROTEIN_LOCALIZATION_TO_CELL_PERIPHERY	25	0.273582	0.76326	0.734066	0.767577
GO_POSITIVE_REGULATION_OF_ACTIVATED_T_CELL_PROLIFERATION	26	0.306356	0.761907	0.733333	0.769311
GO_T_CELL_ACTIVATION	475	0.265225	0.761484	0.705155	0.769612
GO_ORGANELLE_MEMBRANE_FUSION	100	0.219996	0.761187	0.723447	0.769653
GO_ZINC_ION_TRANSPORT	27	0.248967	0.760201	0.790865	0.770882
GO_REGULATION_OF_T_CELL_DIFFERENTIATION	148	0.279863	0.759889	0.707071	0.770925
GO_POSITIVE_REGULATION_OF_LEUKOCYTE_ADHESION_TO_VASCULAR_ENDOTHELIAL_CELL	23	0.346339	0.759371	0.721248	0.771292
GO_POSITIVE_REGULATION_OF_TRANSLATION	132	0.210946	0.758664	0.702128	0.771986
GO_NEGATIVE_REGULATION_OF_MEMBRANE_POTENTIAL	15	0.279339	0.75815	0.793684	0.772395
GO_REGULATION_OF_PROTEIN_SUMOYLATION	26	0.273124	0.757973	0.717803	0.772191
GO_NEGATIVE_REGULATION_OF_T_CELL_DIFFERENTIATION	45	0.282512	0.757942	0.743271	0.771744
GO_POSITIVE_REGULATION_OF_LYMPHOCYTE_CHEMOTAXIS	21	0.337923	0.757334	0.709615	0.772402
GO_RESPONSE_TO_COCAINE	47	0.235298	0.757255	0.770302	0.772097
GO_REGULATION_OF_TUMOR_NECROSIS_FACTOR_MEDIATED_SIGNALING_PATHWAY	57	0.241074	0.757168	0.693548	0.771761
GO_RIBOSOME_BINDING	51	0.24565	0.756964	0.708571	0.771627
GO_ENDOSOMAL_TRANSPORT	224	0.233445	0.755868	0.704365	0.772976
GO_OLFACTORY_RECEPTOR_ACTIVITY	421	0.209673	0.755835	0.783046	0.772549
GO_PROTEIN_POLYUBIQUITINATION	332	0.224789	0.755618	0.72561	0.772463
GO_PYRIMIDINE_CONTAINING_COMPOUND_CATABOLIC_PROCESS	38	0.244995	0.755614	0.774262	0.771985
GO_REGULATION_OF_MICROTUBULE_DEPOLYMERIZATION	29	0.294213	0.755465	0.735537	0.771756
GO_PROGRAMMED_NECROTIC_CELL_DEATH	49	0.247986	0.754348	0.730382	0.773092
GO_POST_ANAL_TAIL_MORPHOGENESIS	18	0.289492	0.754167	0.79021	0.772925
GO_POSITIVE_REGULATION_OF_INTERLEUKIN_12_PRODUCTION	35	0.325452	0.75411	0.726141	0.772517
GO_CYTOKINE_SECRETION	128	0.255568	0.753707	0.711066	0.772689
GO_REGULATION_OF_HETEROTYPIC_CELL_CELL_ADHESION	26	0.277099	0.753387	0.778571	0.772735
GO_HUMORAL_IMMUNE_RESPONSE	352	0.27855	0.75333	0.688841	0.772355
GO_PROTON_TRANSPORTING_TWO_SECTOR_ATPASE_COMPLEX	31	0.208715	0.753206	0.763393	0.772102
GO_REGULATION_OF_INTRACELLULAR_TRANSPORT	344	0.21199	0.753049	0.714885	0.771912
GO_NEGATIVE_REGULATION_OF_T_HELPER_CELL_DIFFERENTIATION	17	0.32611	0.752933	0.747495	0.771648
GO_PROTEIN_SERINE_THREONINE_KINASE_ACTIVITY	422	0.235009	0.752678	0.728953	0.771582
GO_CD4_POSITIVE_OR_CD8_POSITIVE_ALPHA_BETA_T_CELL_LINEAGE_COMMITMENT	22	0.332229	0.750553	0.715746	0.774636
GO_CYTOKINE_METABOLIC_PROCESS	73	0.27407	0.750416	0.718941	0.774409
GO_NEURON_DEATH	352	0.209776	0.749487	0.758542	0.775538
GO_NEGATIVE_REGULATION_OF_I_KAPPAB_KINASE_NF_KAPPAB_SIGNALING	52	0.254878	0.748718	0.741036	0.776351
GO_HISTONE_H3_K9_TRIMETHYLATION	16	0.329231	0.748076	0.748963	0.776883
GO_EXTRINSIC_APOPTOTIC_SIGNALING_PATHWAY	226	0.223152	0.747873	0.724576	0.77682
GO_EMBRYONIC_FORELIMB_MORPHOGENESIS	32	0.281895	0.747854	0.774617	0.776376
GO_GOLGI_VESICLE_TRANSPORT	365	0.217089	0.747623	0.699605	0.776282
GO_POSITIVE_REGULATION_OF_RECEPTOR_SIGNALING_PATHWAY_VIA_STAT	93	0.255589	0.74694	0.784141	0.776916
GO_BONE_REMODELING	91	0.253867	0.745564	0.755411	0.778753
GO_CENTRAL_NERVOUS_SYSTEM_PROJECTION_NEURON_AXONOGENESIS	26	0.281402	0.745412	0.753623	0.778522
GO_PEPTIDYL_LYSINE_ACETYLATION	170	0.229122	0.744559	0.716024	0.779452
GO_EPITHELIAL_TUBE_BRANCHING_INVOLVED_IN_LUNG_MORPHOGENESIS	29	0.279546	0.743797	0.75162	0.780275
GO_REGULATION_OF_TORC1_SIGNALING	31	0.271183	0.742801	0.7357	0.781435
GO_NEGATIVE_REGULATION_OF_CELL_ACTIVATION	201	0.25535	0.74257	0.738947	0.781334
GO_NUCLEUS_ORGANIZATION	126	0.223888	0.742452	0.738956	0.781051
GO_MYELIN_MAINTENANCE	18	0.263038	0.742198	0.78355	0.781007
GO_NUCLEIC_ACID_PHOSPHODIESTER_BOND_HYDROLYSIS	298	0.21498	0.741594	0.730612	0.781518
GO_POSITIVE_REGULATION_OF_AMYLOID_BETA_FORMATION	20	0.255891	0.741159	0.77572	0.781754
GO_REGULATION_OF_RECEPTOR_SIGNALING_PATHWAY_VIA_STAT	151	0.231006	0.741097	0.796943	0.781362
GO_CELL_JUNCTION_DISASSEMBLY	19	0.325661	0.741063	0.719057	0.780953
GO_DEOXYRIBONUCLEASE_ACTIVITY	58	0.242685	0.740979	0.743802	0.780638
GO_RNA_DESTABILIZATION	34	0.263498	0.739881	0.745868	0.781924
GO_MEMBRANE_FUSION	156	0.197516	0.738993	0.75705	0.782885
GO_POSITIVE_REGULATION_OF_PATTERN_RECOGNITION_RECEPTOR_SIGNALING_PATHWAY	37	0.276124	0.738966	0.760776	0.782455
GO_NEGATIVE_REGULATION_OF_RESPONSE_TO_BIOTIC_STIMULUS	94	0.241169	0.738706	0.729032	0.782422
GO_ENDONUCLEOLYTIC_CLEAVAGE_INVOLVED_IN_RRNA_PROCESSING	16	0.312874	0.73795	0.763779	0.78324
GO_REGULATION_OF_MYELOID_LEUKOCYTE_MEDIATED_IMMUNITY	57	0.277469	0.737884	0.73499	0.782855
GO_UBIQUITIN_DEPENDENT_PROTEIN_CATABOLIC_PROCESS_VIA_THE_MULTIVESICULAR_BODY_SORTING_PATHWAY	23	0.276376	0.737741	0.736308	0.782598
GO_ENDOPLASMIC_RETICULUM_MANNOSE_TRIMMING	15	0.308729	0.737568	0.75442	0.782436
GO_POSITIVE_REGULATION_OF_CYSTEINE_TYPE_ENDOPEPTIDASE_ACTIVITY	147	0.22762	0.737478	0.746781	0.782107
GO_TRANSCRIPTION_ELONGATION_FROM_RNA_POLYMERASE_I_PROMOTER	30	0.267656	0.736854	0.741036	0.782583
GO_NEGATIVE_REGULATION_OF_PEPTIDYL_THREONINE_PHOSPHORYLATION	21	0.255464	0.736269	0.735178	0.783172
GO_VASCULAR_ASSOCIATED_SMOOTH_MUSCLE_CELL_APOPTOTIC_PROCESS	17	0.269215	0.73625	0.827957	0.782723
GO_CUL3_RING_UBIQUITIN_LIGASE_COMPLEX	36	0.260012	0.736233	0.730612	0.782294
GO_METHYLATED_HISTONE_BINDING	68	0.265564	0.735877	0.720884	0.782347
GO_MULTI_ORGANISM_CELLULAR_PROCESS	16	0.314625	0.735555	0.766871	0.782476
GO_PROTEIN_SERINE_THREONINE_KINASE_ACTIVATOR_ACTIVITY	38	0.263495	0.734137	0.746392	0.784354
GO_MONONUCLEAR_CELL_MIGRATION	91	0.277675	0.733938	0.726	0.784196
GO_CELLULAR_RESPONSE_TO_INTERFERON_BETA	20	0.286755	0.732708	0.772727	0.785946
GO_MITOCHONDRIAL_TRANSPORT	242	0.19595	0.731876	0.703125	0.786851
GO_IMPORT_INTO_NUCLEUS	169	0.211291	0.73124	0.743158	0.787465
GO_TOLL_LIKE_RECEPTOR_9_SIGNALING_PATHWAY	25	0.293696	0.731117	0.745418	0.787195
GO_POSITIVE_REGULATION_OF_LEUKOCYTE_DIFFERENTIATION	158	0.261619	0.730989	0.702648	0.786918
GO_REGULATION_OF_TOR_SIGNALING	92	0.226062	0.730839	0.753535	0.786681
GO_NADPLUS_NUCLEOSIDASE_ACTIVITY	16	0.335635	0.730794	0.75	0.786272
GO_SCF_UBIQUITIN_LIGASE_COMPLEX	60	0.241893	0.730561	0.729045	0.786195
GO_N_TERMINAL_PROTEIN_AMINO_ACID_MODIFICATION	28	0.254236	0.73037	0.751528	0.786022
GO_PHAGOSOME_ACIDIFICATION	28	0.214651	0.730283	0.805556	0.785701
GO_PEPTIDASE_ACTIVATOR_ACTIVITY_INVOLVED_IN_APOPTOTIC_PROCESS	18	0.296255	0.729711	0.768924	0.7862
GO_RNA_SURVEILLANCE	15	0.291924	0.729346	0.776699	0.786279
GO_CRANIOFACIAL_SUTURE_MORPHOGENESIS	17	0.311728	0.729324	0.783262	0.785836
GO_PYRIMIDINE_RIBONUCLEOTIDE_METABOLIC_PROCESS	24	0.250236	0.728569	0.780876	0.786602
GO_ESCRT_COMPLEX	27	0.253019	0.728561	0.740964	0.786144
GO_CELL_CELL_ADHESION_MEDIATED_BY_INTEGRIN	16	0.331566	0.728404	0.740519	0.785938
GO_14_3_3_PROTEIN_BINDING	30	0.262862	0.727609	0.783505	0.78676
GO_TRNA_BINDING	54	0.249786	0.727562	0.760396	0.78636
GO_REGULATION_OF_RESPONSE_TO_CYTOKINE_STIMULUS	190	0.225577	0.727149	0.75154	0.786557
GO_REGULATION_OF_CELL_ADHESION_MEDIATED_BY_INTEGRIN	47	0.267324	0.726909	0.745418	0.78647
GO_NEGATIVE_REGULATION_OF_RNA_SPLICING	26	0.259101	0.726478	0.777992	0.786702
GO_REGULATION_OF_AMYLOID_BETA_CLEARANCE	18	0.287176	0.725814	0.820565	0.787308
GO_UBIQUITIN_CONJUGATING_ENZYME_BINDING	30	0.268491	0.725707	0.747934	0.787045
GO_COVALENT_CHROMATIN_MODIFICATION	460	0.222219	0.724361	0.750524	0.788831
GO_TYROSINE_PHOSPHORYLATION_OF_STAT_PROTEIN	89	0.241702	0.72424	0.817391	0.788583
GO_REGULATION_OF_IMMUNOGLOBULIN_PRODUCTION	61	0.262801	0.723577	0.747934	0.789129
GO_REGULATION_OF_NUCLEOCYTOPLASMIC_TRANSPORT	111	0.227772	0.723252	0.769874	0.789173
GO_UBIQUITIN_LIKE_PROTEIN_LIGASE_ACTIVITY	293	0.206855	0.723153	0.762887	0.788865
GO_REGULATION_OF_T_CELL_RECEPTOR_SIGNALING_PATHWAY	42	0.28931	0.721903	0.721443	0.790502
GO_INTERLEUKIN_4_PRODUCTION	35	0.286521	0.721814	0.752643	0.790207
GO_MITOCHONDRIAL_FUSION	24	0.257433	0.72179	0.745698	0.78982
GO_TELOMERASE_RNA_LOCALIZATION	19	0.298256	0.721314	0.817491	0.790162
GO_NUCLEAR_TRANSPORT	354	0.210372	0.720956	0.734774	0.790262
GO_REGULATION_OF_TOLL_LIKE_RECEPTOR_SIGNALING_PATHWAY	72	0.26601	0.71956	0.763213	0.79199
GO_BETA_CATENIN_DESTRUCTION_COMPLEX_DISASSEMBLY	21	0.267751	0.719301	0.795652	0.791922
GO_NEGATIVE_REGULATION_OF_OXIDATIVE_STRESS_INDUCED_NEURON_DEATH	18	0.27687	0.718106	0.796178	0.793339
GO_2_OXOGLUTARATE_METABOLIC_PROCESS	15	0.294786	0.718083	0.77686	0.792901
GO_RECEPTOR_SIGNALING_PATHWAY_VIA_STAT	174	0.223191	0.717392	0.800434	0.793597
GO_MITOCHONDRIAL_GENOME_MAINTENANCE	23	0.264482	0.717301	0.780684	0.793247
GO_POSITIVE_REGULATION_OF_CHROMATIN_ORGANIZATION	102	0.214824	0.715048	0.740125	0.796528
GO_FIBRILLAR_CENTER	124	0.216398	0.712003	0.75	0.800857
GO_HISTONE_H3_K4_METHYLATION	53	0.247222	0.711458	0.748414	0.801284
GO_REGULATION_OF_SPHINGOLIPID_BIOSYNTHETIC_PROCESS	17	0.24933	0.710694	0.784553	0.801988
GO_REGULATION_OF_BROWN_FAT_CELL_DIFFERENTIATION	24	0.251531	0.710513	0.812933	0.801824
GO_MACROPHAGE_CYTOKINE_PRODUCTION	16	0.309626	0.710189	0.744597	0.801869
GO_ALPHA_BETA_T_CELL_DIFFERENTIATION	106	0.26487	0.710152	0.738956	0.801447
GO_REGULATION_OF_LYMPHOCYTE_DIFFERENTIATION	179	0.254012	0.709504	0.748466	0.80206
GO_POSITIVE_REGULATION_OF_CATABOLIC_PROCESS	442	0.199257	0.709073	0.733471	0.802269
GO_POSITIVE_REGULATION_OF_NIK_NF_KAPPAB_SIGNALING	79	0.244319	0.708974	0.779626	0.801967
GO_REGULATION_OF_LEUKOCYTE_ADHESION_TO_VASCULAR_ENDOTHELIAL_CELL	37	0.286691	0.70894	0.784553	0.801548
GO_MIRNA_BINDING	29	0.256654	0.707988	0.798337	0.802643
GO_REGULATION_OF_CAMP_DEPENDENT_PROTEIN_KINASE_ACTIVITY	22	0.248056	0.707908	0.868263	0.802288
GO_POSITIVE_REGULATION_OF_CELLULAR_AMIDE_METABOLIC_PROCESS	161	0.193377	0.707724	0.747059	0.802088
GO_HISTONE_BINDING	230	0.241184	0.707629	0.742915	0.801788
GO_PHOSPHATIDYLINOSITOL_PHOSPHATE_PHOSPHATASE_ACTIVITY	31	0.285917	0.707335	0.782158	0.801845
GO_LATE_ENDOSOME_MEMBRANE	129	0.195611	0.706852	0.771372	0.802145
GO_MRNA_EXPORT_FROM_NUCLEUS	111	0.243723	0.706793	0.73814	0.801766
GO_INTERLEUKIN_8_PRODUCTION	101	0.229892	0.706408	0.766046	0.801852
GO_OUTER_MITOCHONDRIAL_MEMBRANE_PROTEIN_COMPLEX	21	0.27012	0.706065	0.750473	0.801942
GO_IMMUNOLOGICAL_SYNAPSE	38	0.304598	0.705481	0.731463	0.802318
GO_INTERLEUKIN_1_PRODUCTION	117	0.252087	0.705198	0.766529	0.802295
GO_U5_SNRNP	22	0.242162	0.705057	0.776596	0.802021
GO_POSITIVE_REGULATION_OF_ERAD_PATHWAY	15	0.287535	0.704954	0.804391	0.801701
GO_TUMOR_NECROSIS_FACTOR_MEDIATED_SIGNALING_PATHWAY	167	0.216435	0.704589	0.779835	0.801759
GO_SENSORY_PERCEPTION_OF_SMELL	446	0.19192	0.704227	0.90462	0.801839
GO_TRANSCRIPTION_PREINITIATION_COMPLEX_ASSEMBLY	36	0.242	0.703966	0.77551	0.801776
GO_NEGATIVE_REGULATION_OF_ALPHA_BETA_T_CELL_ACTIVATION	39	0.26608	0.703873	0.8	0.801439
GO_ORGANELLE_ENVELOPE_LUMEN	84	0.191254	0.702879	0.754455	0.802528
GO_RESPONSE_TO_HEAT	161	0.197129	0.702724	0.744511	0.802346
GO_I_KAPPAB_KINASE_NF_KAPPAB_SIGNALING	282	0.226012	0.702092	0.767821	0.802814
GO_POSITIVE_REGULATION_OF_INTERLEUKIN_8_PRODUCTION	54	0.252081	0.700702	0.779915	0.804511
GO_REGULATION_OF_MRNA_CATABOLIC_PROCESS	199	0.197455	0.699721	0.763527	0.80555
GO_DNA_METHYLATION_DEPENDENT_HETEROCHROMATIN_ASSEMBLY	18	0.275713	0.6996	0.811839	0.805275
GO_PROTEIN_PHOSPHORYLATED_AMINO_ACID_BINDING	53	0.240628	0.699075	0.775967	0.805644
GO_ESTABLISHMENT_OF_EPITHELIAL_CELL_APICAL_BASAL_POLARITY	15	0.267764	0.698837	0.825726	0.805613
GO_NATURAL_KILLER_CELL_MEDIATED_IMMUNITY	65	0.290724	0.698468	0.737946	0.805685
GO_HISTONE_H3_K9_METHYLATION	37	0.265708	0.698326	0.764463	0.80545
GO_CENTRIOLE	131	0.249017	0.698017	0.759443	0.805447
GO_ISOMERASE_ACTIVITY	149	0.187251	0.69618	0.82265	0.807803
GO_INTERLEUKIN_12_PRODUCTION	57	0.291841	0.695562	0.745935	0.808336
GO_REGULATION_OF_NEUTROPHIL_MIGRATION	41	0.286301	0.694955	0.754564	0.808772
GO_MICROTUBULE_ANCHORING	21	0.313492	0.694548	0.789579	0.808913
GO_ARF_GUANYL_NUCLEOTIDE_EXCHANGE_FACTOR_ACTIVITY	18	0.258082	0.694199	0.768267	0.809015
GO_T_CELL_LINEAGE_COMMITMENT	28	0.285173	0.693442	0.76971	0.809659
GO_TOR_SIGNALING	113	0.210992	0.693377	0.774193	0.809324
GO_PHAGOCYTOSIS	362	0.26746	0.693241	0.743802	0.809084
GO_ZINC_ION_TRANSMEMBRANE_TRANSPORTER_ACTIVITY	21	0.245601	0.692381	0.854503	0.810058
GO_TORC1_SIGNALING	39	0.247695	0.691055	0.770297	0.811667
GO_HISTONE_METHYLTRANSFERASE_ACTIVITY_H3_K4_SPECIFIC	17	0.285193	0.690632	0.800866	0.811879
GO_POSITIVE_REGULATION_OF_CELL_ACTIVATION	394	0.265737	0.690471	0.7577	0.811699
GO_CYTOKINE_PRODUCTION_INVOLVED_IN_IMMUNE_RESPONSE	102	0.250157	0.689969	0.795876	0.812025
GO_NEGATIVE_REGULATION_OF_LEUKOCYTE_MEDIATED_IMMUNITY	52	0.273091	0.689849	0.772152	0.811771
GO_UBIQUITIN_LIKE_PROTEIN_BINDING	90	0.237361	0.689597	0.774257	0.811688
GO_REGULATION_OF_RESPONSE_TO_OXIDATIVE_STRESS	96	0.201617	0.687342	0.787755	0.814639
GO_ENDOPLASMIC_RETICULUM_QUALITY_CONTROL_COMPARTMENT	22	0.256633	0.686694	0.814229	0.815114
GO_NBAF_COMPLEX	15	0.269252	0.686355	0.825902	0.815156
GO_DNA_TEMPLATED_TRANSCRIPTION_ELONGATION	108	0.230176	0.684889	0.776031	0.816849
GO_RESPONSE_TO_AMINO_ACID_STARVATION	45	0.22768	0.682376	0.782101	0.820278
GO_REGULATION_OF_LYMPHOCYTE_CHEMOTAXIS	27	0.311599	0.682327	0.792415	0.819879
GO_MACROPHAGE_MIGRATION	54	0.249953	0.68059	0.801205	0.822133
GO_HISTONE_METHYLATION	132	0.21577	0.680487	0.773218	0.821811
GO_REGULATION_OF_IMMUNE_EFFECTOR_PROCESS	452	0.248492	0.680257	0.765199	0.821652
GO_POSITIVE_REGULATION_OF_MRNA_CATABOLIC_PROCESS	49	0.2401	0.679596	0.781124	0.822171
GO_REGULATION_OF_PRODUCTION_OF_MOLECULAR_MEDIATOR_OF_IMMUNE_RESPONSE	136	0.239436	0.679323	0.804928	0.822116
GO_CYSTEINE_TYPE_PEPTIDASE_ACTIVITY	137	0.202249	0.678595	0.810021	0.822799
GO_IMMUNE_RECEPTOR_ACTIVITY	132	0.263538	0.678019	0.772727	0.823183
GO_UBIQUITIN_LIKE_PROTEIN_CONJUGATING_ENZYME_BINDING	36	0.23993	0.67628	0.80083	0.825178
GO_POSITIVE_REGULATION_OF_EXECUTION_PHASE_OF_APOPTOSIS	15	0.2646	0.673392	0.827935	0.828845
GO_RRNA_METABOLIC_PROCESS	224	0.215298	0.671865	0.782197	0.830756
GO_POSITIVE_REGULATION_OF_MACROPHAGE_MIGRATION	25	0.286716	0.671168	0.793651	0.83132
GO_REGULATION_OF_B_CELL_MEDIATED_IMMUNITY	49	0.260746	0.670961	0.777096	0.831123
GO_CYTOSOLIC_LARGE_RIBOSOMAL_SUBUNIT	58	0.255826	0.670573	0.800839	0.831255
GO_ALPHA_BETA_T_CELL_ACTIVATION	145	0.249612	0.670566	0.777096	0.830796
GO_INTRACELLULAR_LIPID_TRANSPORT	43	0.225479	0.670556	0.847082	0.830343
GO_PROTEIN_K63_LINKED_DEUBIQUITINATION	31	0.251904	0.669447	0.815574	0.831549
GO_REGULATION_OF_MACROPHAGE_CHEMOTAXIS	29	0.262646	0.668565	0.838843	0.832473
GO_NIK_NF_KAPPAB_SIGNALING	181	0.199033	0.668342	0.811359	0.832362
GO_REGULATION_OF_RESPONSE_TO_ENDOPLASMIC_RETICULUM_STRESS	88	0.197764	0.668256	0.784553	0.83205
GO_ETHER_METABOLIC_PROCESS	25	0.222993	0.667901	0.862786	0.832144
GO_HISTONE_LYSINE_N_METHYLTRANSFERASE_ACTIVITY	39	0.245572	0.667878	0.8	0.831713
GO_NEGATIVE_REGULATION_OF_PROTEIN_TYROSINE_KINASE_ACTIVITY	27	0.239469	0.666727	0.826347	0.832929
GO_PRECATALYTIC_SPLICEOSOME	52	0.243336	0.665634	0.829982	0.83406
GO_NEGATIVE_REGULATION_OF_BONE_MINERALIZATION	18	0.235505	0.661847	0.926014	0.839068
GO_ACETYL_COA_BIOSYNTHETIC_PROCESS_FROM_PYRUVATE	16	0.249927	0.660713	0.834971	0.840286
GO_RIBONUCLEASE_ACTIVITY	110	0.200003	0.658559	0.798354	0.843031
GO_PRESPLICEOSOME	17	0.240809	0.65796	0.828629	0.843415
GO_ADAPTIVE_IMMUNE_RESPONSE_BASED_ON_SOMATIC_RECOMBINATION_OF_IMMUNE_RECEPTORS_BUILT_FROM_IMMUNOGLOBULIN_SUPERFAMILY_DOMAINS	349	0.273045	0.657675	0.780538	0.843365
GO_RIBOSOMAL_LARGE_SUBUNIT_ASSEMBLY	29	0.221311	0.657327	0.836134	0.843369
GO_NCRNA_CATABOLIC_PROCESS	33	0.21993	0.657091	0.814737	0.843235
GO_INFLAMMATORY_CELL_APOPTOTIC_PROCESS	21	0.265791	0.656258	0.814737	0.843929
GO_REGULATION_OF_LYMPHOCYTE_ACTIVATION	489	0.238538	0.655913	0.780933	0.843912
GO_MRNA_3_END_PROCESSING	96	0.221362	0.655842	0.762906	0.843524
GO_ENDOPEPTIDASE_COMPLEX	68	0.214363	0.651956	0.813333	0.848694
GO_PEPTIDYL_LYSINE_METHYLATION	113	0.217213	0.651896	0.79661	0.848298
GO_PROTEIN_SUMOYLATION	80	0.225368	0.649543	0.785714	0.85115
GO_PEPTIDE_LYSINE_N_ACETYLTRANSFERASE_ACTIVITY	56	0.255308	0.649095	0.782524	0.851364
GO_REGULATION_OF_RESPONSE_TO_INTERFERON_GAMMA	25	0.232414	0.647544	0.858333	0.853108
GO_HISTONE_H3_K9_MODIFICATION	48	0.237348	0.646733	0.802469	0.853779
GO_NEGATIVE_REGULATION_OF_REGULATED_SECRETORY_PATHWAY	22	0.266961	0.646714	0.824131	0.853332
GO_KERATIN_FILAMENT	94	0.196431	0.646194	0.947699	0.853587
GO_POSITIVE_REGULATION_OF_NATURAL_KILLER_CELL_ACTIVATION	20	0.273771	0.645969	0.823171	0.853411
GO_RIBOSOME_BIOGENESIS	292	0.206716	0.645764	0.792453	0.853215
GO_REGULATION_OF_RECEPTOR_LOCALIZATION_TO_SYNAPSE	17	0.241467	0.645446	0.86558	0.853146
GO_MEMBRANE_INVAGINATION	129	0.29111	0.644183	0.773006	0.854392
GO_MITOCHONDRIAL_CALCIUM_ION_TRANSMEMBRANE_TRANSPORT	23	0.21371	0.643011	0.861344	0.855682
GO_DETECTION_OF_LIGHT_STIMULUS_INVOLVED_IN_SENSORY_PERCEPTION	19	0.239751	0.643001	0.950119	0.855217
GO_FERROUS_IRON_BINDING	26	0.212227	0.642996	0.899396	0.854753
GO_CARD_DOMAIN_BINDING	15	0.293648	0.642294	0.831197	0.855334
GO_METHYLTRANSFERASE_COMPLEX	102	0.224327	0.642037	0.798805	0.855209
GO_CELLULAR_RESPONSE_TO_ARSENIC_CONTAINING_SUBSTANCE	20	0.225907	0.64158	0.844444	0.855365
GO_REGULATION_OF_NATURAL_KILLER_CELL_MEDIATED_IMMUNITY	44	0.286924	0.641574	0.783951	0.854899
GO_REGULATION_OF_T_CELL_CHEMOTAXIS	17	0.295046	0.641532	0.808594	0.854518
GO_DNA_REPAIR_COMPLEX	38	0.23891	0.641153	0.79588	0.854497
GO_REGULATION_OF_CYTOKINE_PRODUCTION_INVOLVED_IN_IMMUNE_RESPONSE	82	0.244122	0.640793	0.857143	0.854531
GO_POSITIVE_REGULATION_OF_NITRIC_OXIDE_METABOLIC_PROCESS	46	0.22481	0.640787	0.878723	0.854069
GO_POSITIVE_REGULATION_OF_TOLL_LIKE_RECEPTOR_SIGNALING_PATHWAY	24	0.253514	0.63987	0.837067	0.854791
GO_NEGATIVE_REGULATION_OF_VASCULAR_ENDOTHELIAL_GROWTH_FACTOR_PRODUCTION	30	0.219271	0.639509	0.892794	0.854769
GO_POSITIVE_REGULATION_OF_CYTOKINE_BIOSYNTHETIC_PROCESS	37	0.260694	0.63792	0.821569	0.856508
GO_2_OXOGLUTARATE_DEPENDENT_DIOXYGENASE_ACTIVITY	43	0.222357	0.6373	0.8	0.856853
GO_POST_GOLGI_VESICLE_MEDIATED_TRANSPORT	99	0.219131	0.636637	0.793372	0.857283
GO_PROTON_TRANSPORTING_V_TYPE_ATPASE_COMPLEX	26	0.191687	0.636253	0.907658	0.857354
GO_PEPTIDE_N_ACETYLTRANSFERASE_ACTIVITY	63	0.244019	0.635712	0.789168	0.857557
GO_TBP_CLASS_PROTEIN_BINDING	26	0.236174	0.634968	0.816327	0.858027
GO_MIRNA_METABOLIC_PROCESS	26	0.226949	0.633472	0.871102	0.859502
GO_PEPTIDYL_LYSINE_MODIFICATION	382	0.193123	0.631559	0.792	0.861586
GO_ACUTE_INFLAMMATORY_RESPONSE_TO_ANTIGENIC_STIMULUS	23	0.265992	0.630456	0.868476	0.862623
GO_NUCLEOTIDE_EXCISION_REPAIR_PREINCISION_COMPLEX_ASSEMBLY	29	0.225666	0.63015	0.841418	0.862543
GO_NUCLEOTIDE_EXCISION_REPAIR_DNA_DUPLEX_UNWINDING	22	0.226503	0.628251	0.864151	0.864576
GO_DETECTION_OF_OTHER_ORGANISM	19	0.286513	0.627946	0.863135	0.864561
GO_REGULATION_OF_MRNA_POLYADENYLATION	16	0.260425	0.627621	0.8998	0.86451
GO_MEMBRANE_PROTEIN_INTRACELLULAR_DOMAIN_PROTEOLYSIS	18	0.255927	0.627578	0.845545	0.864112
GO_PROTEIN_K48_LINKED_DEUBIQUITINATION	31	0.247385	0.62756	0.822709	0.86366
GO_POSITIVE_REGULATION_OF_LYMPHOCYTE_ACTIVATION	335	0.246962	0.62649	0.801242	0.864583
GO_POSITIVE_REGULATION_OF_HUMORAL_IMMUNE_RESPONSE	18	0.275387	0.625912	0.870775	0.864878
GO_P_BODY_ASSEMBLY	19	0.254161	0.625167	0.840077	0.865396
GO_REGULATION_OF_NIK_NF_KAPPAB_SIGNALING	116	0.202103	0.622304	0.844898	0.868685
GO_B_CELL_ACTIVATION_INVOLVED_IN_IMMUNE_RESPONSE	74	0.238016	0.621943	0.82449	0.868711
GO_SULFUR_AMINO_ACID_CATABOLIC_PROCESS	15	0.219416	0.621915	0.934579	0.868279
GO_NLS_BEARING_PROTEIN_IMPORT_INTO_NUCLEUS	20	0.23737	0.621476	0.871681	0.868395
GO_PHOSPHOTRANSFERASE_ACTIVITY_FOR_OTHER_SUBSTITUTED_PHOSPHATE_GROUPS	18	0.274519	0.621013	0.861446	0.868575
GO_NEGATIVE_REGULATION_OF_INTERLEUKIN_2_PRODUCTION	23	0.241863	0.62048	0.859833	0.868812
GO_ATPASE_COMPLEX	76	0.211208	0.620423	0.821721	0.868409
GO_CHEMOKINE_C_X_C_MOTIF_LIGAND_2_PRODUCTION	15	0.251704	0.616771	0.873984	0.872573
GO_N_ACYLTRANSFERASE_ACTIVITY	98	0.189299	0.615615	0.834368	0.873661
GO_NUCLEAR_TRANSCRIBED_MRNA_CATABOLIC_PROCESS	201	0.191959	0.614611	0.819444	0.874555
GO_RNA_3_END_PROCESSING	145	0.188728	0.614031	0.792636	0.874768
GO_MRNA_TRANSPORT	148	0.195064	0.609609	0.805769	0.87952
GO_DOUBLE_STRANDED_RNA_BINDING	76	0.208441	0.608469	0.823028	0.880524
GO_TRANSCRIPTION_ELONGATION_FROM_RNA_POLYMERASE_II_PROMOTER	79	0.207283	0.607171	0.838323	0.881678
GO_REGULATION_OF_ANTIGEN_PROCESSING_AND_PRESENTATION	20	0.306175	0.606428	0.840237	0.882122
GO_PROTEASOMAL_UBIQUITIN_INDEPENDENT_PROTEIN_CATABOLIC_PROCESS	22	0.218336	0.605474	0.880859	0.882899
GO_PROTEASOME_CORE_COMPLEX	20	0.234905	0.604209	0.913655	0.883931
GO_DETECTION_OF_TEMPERATURE_STIMULUS_INVOLVED_IN_SENSORY_PERCEPTION	18	0.218841	0.603086	0.958537	0.884786
GO_POSITIVE_REGULATION_OF_T_CELL_MIGRATION	30	0.26208	0.602643	0.814815	0.884787
GO_POSITIVE_REGULATION_OF_TRANSCRIPTION_INITIATION_FROM_RNA_POLYMERASE_II_PROMOTER	31	0.204578	0.60083	0.875519	0.886535
GO_REGULATION_OF_MRNA_METABOLIC_PROCESS	334	0.171229	0.599803	0.820565	0.887332
GO_RNA_LOCALIZATION	231	0.187904	0.598884	0.80226	0.88794
GO_PROTEIN_QUALITY_CONTROL_FOR_MISFOLDED_OR_INCOMPLETELY_SYNTHESIZED_PROTEINS	28	0.224663	0.598188	0.852207	0.888273
GO_N_ACETYLTRANSFERASE_ACTIVITY	82	0.203107	0.597113	0.84507	0.889038
GO_NEGATIVE_REGULATION_OF_ANTIGEN_RECEPTOR_MEDIATED_SIGNALING_PATHWAY	31	0.238846	0.594577	0.835968	0.891563
GO_PROTEIN_DEGLYCOSYLATION	26	0.22629	0.594263	0.851429	0.891461
GO_RNA_POLYMERASE_II_HOLOENZYME	77	0.195655	0.59412	0.833659	0.891146
GO_REGULATION_OF_AUTOPHAGOSOME_ASSEMBLY	36	0.210178	0.593811	0.841699	0.891023
GO_PROTEIN_METHYLATION	163	0.185099	0.59368	0.847966	0.890712
GO_TRANSCRIPTION_COACTIVATOR_ACTIVITY	260	0.170571	0.59283	0.846154	0.891189
GO_REGULATION_OF_B_CELL_PROLIFERATION	62	0.236737	0.592557	0.868526	0.891038
GO_RNA_POLYMERASE_II_PREINITIATION_COMPLEX_ASSEMBLY	25	0.205658	0.590508	0.902954	0.893032
GO_PEPTIDYL_LYSINE_TRIMETHYLATION	43	0.222949	0.589978	0.844898	0.893184
GO_T_CELL_CHEMOTAXIS	28	0.266746	0.588584	0.848837	0.894302
GO_GOLGI_TO_PLASMA_MEMBRANE_TRANSPORT	57	0.203174	0.587224	0.842413	0.895366
GO_NUCLEAR_EXOSOME_RNASE_COMPLEX	15	0.245409	0.586846	0.920234	0.895291
GO_RNA_SPLICING_VIA_ENDONUCLEOLYTIC_CLEAVAGE_AND_LIGATION	15	0.237957	0.584708	0.908549	0.897259
GO_THREONINE_TYPE_ENDOPEPTIDASE_ACTIVITY	21	0.211073	0.583155	0.915984	0.898487
GO_HISTONE_H4_K16_ACETYLATION	21	0.243331	0.581936	0.875494	0.899285
GO_PRC1_COMPLEX	15	0.241056	0.580679	0.884615	0.900112
GO_CHEMOKINE_BINDING	33	0.252321	0.579589	0.842105	0.900778
GO_NEGATIVE_REGULATION_OF_CHEMOKINE_PRODUCTION	22	0.227834	0.57555	0.952586	0.904727
GO_LYMPHOCYTE_MEDIATED_IMMUNITY	345	0.241295	0.575455	0.842105	0.904361
GO_NUCLEAR_SPECK	383	0.170056	0.574902	0.829703	0.904453
GO_INTERLEUKIN_1_BETA_PRODUCTION	103	0.204665	0.568992	0.911704	0.910131
GO_HISTONE_MRNA_METABOLIC_PROCESS	22	0.219378	0.567864	0.923372	0.910766
GO_REGULATION_OF_ER_TO_GOLGI_VESICLE_MEDIATED_TRANSPORT	16	0.220902	0.567254	0.934866	0.910899
GO_MRNA_CLEAVAGE_FACTOR_COMPLEX	22	0.227862	0.563846	0.912351	0.914046
GO_RIBOSOME_ASSEMBLY	62	0.174885	0.563409	0.861224	0.914054
GO_RIBOSOMAL_SMALL_SUBUNIT_BINDING	17	0.209681	0.557929	0.947269	0.918917
GO_ESTABLISHMENT_OF_RNA_LOCALIZATION	198	0.175628	0.555134	0.838772	0.921094
GO_REGULATION_OF_CYTOPLASMIC_TRANSLATION	29	0.197298	0.552479	0.891348	0.923178
GO_REGULATION_OF_T_CELL_MIGRATION	42	0.226991	0.552332	0.873518	0.922818
GO_NCRNA_TRANSCRIPTION	101	0.18183	0.55057	0.847826	0.923971
GO_TRICARBOXYLIC_ACID_CYCLE	34	0.201323	0.545684	0.86747	0.928123
GO_REGULATION_OF_TRANSCRIPTION_FROM_RNA_POLYMERASE_II_PROMOTER_IN_RESPONSE_TO_HYPOXIA	75	0.15615	0.543871	0.869231	0.929365
GO_RIBONUCLEOPROTEIN_COMPLEX_BIOGENESIS	455	0.155833	0.54011	0.84913	0.932268
GO_CYTOPLASMIC_SEQUESTERING_OF_PROTEIN	23	0.200921	0.534967	0.917671	0.936354
GO_SMN_SM_PROTEIN_COMPLEX	19	0.199627	0.531838	0.957198	0.938627
GO_POSITIVE_T_CELL_SELECTION	36	0.236445	0.531343	0.882828	0.938545
GO_ROUGH_ENDOPLASMIC_RETICULUM_MEMBRANE	27	0.162486	0.528487	0.953216	0.940559
GO_PRODUCTION_OF_MOLECULAR_MEDIATOR_OF_IMMUNE_RESPONSE	296	0.207311	0.526323	0.884058	0.941964
GO_ESTABLISHMENT_OF_PROTEIN_LOCALIZATION_TO_ENDOPLASMIC_RETICULUM	115	0.17027	0.524038	0.857707	0.943263
GO_EXORIBONUCLEASE_ACTIVITY	39	0.191852	0.522483	0.89703	0.943963
GO_NEGATIVE_REGULATION_OF_INTERLEUKIN_8_PRODUCTION	37	0.177438	0.522126	0.982824	0.943809
GO_PROTEIN_ACETYLTRANSFERASE_COMPLEX	91	0.187665	0.520227	0.895257	0.944835
GO_VITAMIN_D_RECEPTOR_BINDING	15	0.228003	0.516778	0.96627	0.94692
GO_CATALYTIC_ACTIVITY_ACTING_ON_RNA	350	0.156334	0.512469	0.861933	0.949838
GO_IMMUNE_RESPONSE_REGULATING_SIGNALING_PATHWAY	496	0.189878	0.509264	0.871102	0.951702
GO_RNA_PHOSPHODIESTER_BOND_HYDROLYSIS_EXONUCLEOLYTIC	42	0.182478	0.508232	0.90625	0.952041
GO_DNA_REPLICATION_FACTOR_A_COMPLEX	15	0.191424	0.505362	0.974257	0.953713
GO_PRODUCTION_OF_SMALL_RNA_INVOLVED_IN_GENE_SILENCING_BY_RNA	51	0.167395	0.502415	0.938034	0.955288
GO_PRENYLTRANSFERASE_ACTIVITY	17	0.20944	0.500572	0.94499	0.956096
GO_U2_TYPE_CATALYTIC_STEP_2_SPLICEOSOME	30	0.191606	0.497296	0.970534	0.95798
GO_SNRNA_TRANSCRIPTION	71	0.173927	0.496626	0.907115	0.957899
GO_REGULATION_OF_CONNECTIVE_TISSUE_REPLACEMENT	15	0.200706	0.491806	0.977941	0.96065
GO_POSITIVE_REGULATION_OF_CYTOKINE_PRODUCTION_INVOLVED_IN_INFLAMMATORY_RESPONSE	22	0.206801	0.486513	0.936345	0.963457
GO_NUCLEOTIDE_EXCISION_REPAIR_DNA_DAMAGE_RECOGNITION	23	0.182932	0.484669	0.988701	0.964029
GO_MLL1_2_COMPLEX	29	0.194496	0.4809	0.946463	0.965841
GO_SMALL_RIBOSOMAL_SUBUNIT	72	0.157167	0.480375	0.932939	0.965614
GO_NUCLEOTIDE_EXCISION_REPAIR_PREINCISION_COMPLEX_STABILIZATION	21	0.176231	0.477864	0.971963	0.966535
GO_U2_TYPE_SPLICEOSOMAL_COMPLEX	91	0.162332	0.475138	0.927103	0.967557
GO_VIRION_ASSEMBLY	40	0.166473	0.474214	0.946939	0.967581
GO_SIN3_TYPE_COMPLEX	15	0.204859	0.465258	0.982626	0.971639
GO_REGULATION_OF_MRNA_PROCESSING	151	0.137274	0.450157	0.924	0.978132
GO_REGULATION_OF_RNA_EXPORT_FROM_NUCLEUS	16	0.20565	0.443516	0.992551	0.980431
GO_TERMINATION_OF_RNA_POLYMERASE_II_TRANSCRIPTION	35	0.170546	0.44175	0.974757	0.980604
GO_SMALL_NUCLEOLAR_RIBONUCLEOPROTEIN_COMPLEX	29	0.142742	0.428194	0.995565	0.985023
GO_TRANSCRIPTIONALLY_ACTIVE_CHROMATIN	20	0.159059	0.413027	0.984405	0.989161
GO_IMMUNOGLOBULIN_PRODUCTION	202	0.171285	0.398334	0.939148	0.992402
GO_TERMINATION_OF_RNA_POLYMERASE_I_TRANSCRIPTION	30	0.147808	0.392222	0.986487	0.993241
GO_NCRNA_PROCESSING	372	0.119694	0.372737	0.963391	0.996105
GO_B_CELL_MEDIATED_IMMUNITY	210	0.169062	0.369732	0.95842	0.995998
GO_VIRAL_BUDDING_VIA_HOST_ESCRT_COMPLEX	21	0.136978	0.363776	0.996078	0.996319
GO_RRNA_BINDING	60	0.116044	0.359881	0.98994	0.99624
GO_CATALYTIC_STEP_2_SPLICEOSOME	85	0.126922	0.34941	0.982626	0.99691
GO_ANTIGEN_BINDING	152	0.171506	0.332027	0.946392	0.997703
[truncated: 63 more rows]
